# Supplementary material for: Molecular dissection of the genetic mechanisms that underlie expression conservation in orthologous yeast ribosomal promoters
Source: HighWire-hosted journal article supplement (doi:10.1101/gr.179259.114), 2014-10-07
Supplement: Supplemental_Tables.xlsx [file Supplemental_Tables.xlsx]

## Sheet: Supplementary Table S1
(*) We found that Pre-WGD species include several RP gene duplicates. For instance, we found two copies of RPL39 in D. hansenii, denoted them by RPL39_v1ha and RPL39_v2ha, and included only RPL39_v2ha in our library.
Gene (* see above)	Organism	PromoterActivity_Mean	PromoterActivity_SE	PromoterDatabaseSequence	ActualPromoter
RPL1	S_Kluyveri	1.25408	0.0266935	TTATAGACGGAAACCCGGTGTTTACGTAGAAAGACCACGGCTTGATAGCCATTCAACAATTTACCTAGCACTTTGCCAGCCAACGGTGGCCATATCGTTCATCAATCATCCGTGCTAAAGCAGGCCCATCAAAAGCATTTGGTACGTAATTCTCAAAGTCACATGACTCATCAGAGAAACCCAGTCACCATACCACTGGATACTCGGCCATTTTTTTCTCCCAGAAAAAAACAAATACGAAAAAAATACAAAAAAGCAGCCACCAAAGTGCAATTGCACAGAAAAGTGTTTGGGTGTAGCCAGACCAACGCAACAGTCAAACGTTTTTGAACAAAAAATTTTTCAACACTTTCCCATTTCAAGATGAATTAGACACGGCCTCTTTCCTGCTACTCCCAC…	-
RPL1	K_Lactis	0.329977	0.0106093	CCCTACAATGATTCAGTATTCGCATGCAGCACCGTGCTACCTTTAACTGTCCAGGTATTGCATATTTGACATTTTACAGCCTTAACTTTTGATTGTCAGTACATATTCCACAGGAGAAACCTTAAAATATAACACCGATGAGATACAAATAAAGGTGAATAAGGAAGTACGTGCACTTTGCGAGTTCTCTAACAGGACGGACTACGAACTATGCAGCTTAGAGGACAACTTCAAGTCTCATCTGGACCTTATGATGCTACTTGGCAAGCGAATAGCCATTAACCCACACACCGCATAATGGTTAAGGATAGTGACACAATTTAAGATTTGAAATTCTTCCTAATTAGGATATTGTTGGCACTGAAATAATAAACACCCAGTCACCGCACCAATTTTCAA…	-
RPL1A	S_Cerevisiae	0.967346	0.0330528	GCTTTGTCGATGGGATAAAGGTAAAAAGAACAACGTAATTAAATCATTACGAAAACTCTACTGCATTATTTTTTAGTCTTTTTATAGAGACATGAACATTCAATTACTTTCAAGGATAAATATTCTAATATTCATATTATTCACTTATGTATTTTTAACGAAACTCTACTCCATTCTACTGGGATCGGGCATACTTTACGGGGTGCACGGATTTTAGCAGTCTTTTTCTTTCTTGGCTTTTGCGAGATGCCTTGAGAGGAAGATTTTTTTTTCACTCAAAACCTCTGTCTTGTACATATCTAGAACATGTTTCATTGATATTGGACGTTACTATTTCAATTTAACAGTCAACCAGTCGTCCAAAA	GCTTTGTCGATGGGATAAAGGTAAAAAGAACAACGTAATTAAATCATTACGAAAACTCTACTGCATTATTTTTTAGTCTTTTTATAGAGACATGAACATTCAATTACTTTCAAGGATAAATATTCTAATATTCATATTATTCACTTATGTATTTTTAACGAAACTCTACTCCATTCTACTGGGATCGGGCATACTTTACGGGGTGCACGGATTTTAGCAGTCTTTTTCTTTCTTGGCTTTTGCGAGATGCCTTGAGAGGAAGATTTTTTTTTCACTCAAAACCTCTGTCTTGTACATATCTAGAACATGTTTCATTGATATTGGACGTTACTATTTCAATTTAACAGTCAACCAGTCGTCCAAAA
RPL1A	S_Paradoxus	0.856718	0.0234982	GCTTTCTCGACAGGATAAAGGTAAGAAAGAACGAAGTAATCAAAAAATTACGAAAACTCTACTGCATTATTTTTCAGGCTCTCTTGAGACATGAACATTCAATTACTTTCAAGGATAAATATTCTAATATTCATATTATTCACTTATGTATTTTTAACGATAAAACTTCTACTTTATTGTACTGGGGAGCTGCATTCTTTATGGGGTGTACGGATTTAACAGTCTTTTTTCTTTCTTGGGCGCGATACCTTGAGAGAGAGACTTTTTTTTTCACCTACTACCTCTGCCCATCTTATATCTAGAACATGTTTTATTGAACTTCAACATTAATACAATTTGTAGCAATCAACCAGTCATCAAAGAA	GCTTTCTCGACAGGATAAAGGTAAGAAAGAACGAAGTAATCAAAAAATTACGAAAACTCTACTGCATTATTTTTCAGGCTCTCTTGAGACATGAACATTCAATTACTTTCAAGGATAAATATTCTAATATTCATATTATTCACTTATGTATTTTTAACGATAAAACTTCTACTTTATTGTACTGGGGAGCTGCATTCTTTATGGGGTGTACGGATTTAACAGTCTTTTTTCTTTCTTGGGCGCGATACCTTGAGAGAGAGACTTTTTTTTTCACCTACTACCTCTGCCCATCTTATATCTAGAACATGTTTTATTGAACTTCAACATTAATACAATTTGTAGCAATCAACCAGTCATCAAAGAA
RPL1A	S_Mikatae	0.706716	0.0157908	GCCTCCTTGATGAAATTAAGGTAAAAAAGAGCAAGGTGTTTAACTAATAACGACAGCTCTACTGCATTATTTTTCAGACTCTTTTGAGACTGGAAATTCAATTACTCTAAAGGATAAATATTCTAATAATCGTATCATTCACTTATGTATTTTTAACAATAAGACTTTCCACTTCATTGCGCTGGGTGCCAGCTTAATATGTATGGGTGCACGTATTTAAACAGTCTTTTTTTCTTGGGCGCGGTGCAATGAGTGAAAGAGATTTTCTTCTATTCAAAACTAATGTTCATCTTATATTGTGAAGAACATGTTTTGGTGAAACTGAGCTTTTGTTGTTACATTTCGTAAGAACTAACCAATCATCAAAA	GCCTCCTTGATGAAATTAAGGTAAAAAAGAGCAAGGTGTTTAACTAATAACGACAGCTCTACTGCATTATTTTTCAGACTCTTTTGAGACTGGAAATTCAATTACTCTGAAGGATAAATATTTTAATAATCGTATCATTCACTTATGTATTTTTAACAATAAGACTTTCCACTTCATTGCGCTGGGTGCCAGCTTAATATGTATGGGTGCACGTATTTAAACAGTCTTTTTTTCTTGGGCGCGGTGCAATGAGTGAAAGAGATTTTCTTCTATTCAAAACTAATGTTCATCTTATATTGTGAAGAACATGTTTTGGTGAAACTGAGCTTTTGTTGTTACATTTCGTAAGAACTAACCAATCATCAAAA
RPL1A	S_Bayanus	1.09382	0.0275354	ACTTTTCAGATAGACTAAGGGGAAAAGAGACGACGAAACAAATAAACACAGAATCCCACTGCATTGCTCTTCCTTCGAGAAACGAACACTCAATTACTTGCAAGGATAAATATTCTAATATTCATATTATTATTAACTTTTGTATTTTTAACAGTATAGACTTCTATTTCATTGTACTACACAAAGGATTATTATAGTGGAATGCACGGATTTAGACTAAGAAAAAAGCAGTCTTTTTTTTTGGGGCGCGATGCTTCGAGCGGAAGAAATTTTTTTTTTTTTTTTTTTTTTTTCAGATTGACTGTATTCTATGCCATCTTAGGATTAAAGAAAATATTTCATTACTGTTAATCCACATTATTGTACTTTGCAACACTCAAAAGGTCAGCAAAA	ACTTTTCAGATAGACTAAGGGGAAAAGAGACGACGAAACAAATAAACACAGAATCCCACTGCATTGCTCTTCCTTCGAGAAACGAACACTCAATTACTTGCAAGGATAAATATTCTAATATTCATATTATTATTAACTTTTGTATTTTTAACAGTATAGACTTCTATTTCATTGTACTACACAAAGGATTATTATAGTGGAATGCACGGATTTAGACTAAGAAAAAAGCAGTCTTTTTTTTTGGGGCGCGATGCTTCGAGCGGAAGAAATTTTTTTTTTTTTTTTTTTTTTTTCAGATTGACTGTATTCTATGCCATCTTAGGATTAAAGAAAATATTTCATTACTGTTAATCCACATTATTGTACTTTGCAACACTCAAAAGGTCAGCAAAA
RPL1B	S_Cerevisiae	1.02632	0.0323587	TTTCCCGTCAGTATGTGTAGTCATTACTTCAAACCTCGGATAAGCCCATCTTGATGGCTACGACTTCCATCTATATCAGAGGCTGACATTTTTCTCTCATTGACGGAGACGCCCTTTAACCGGACCTGATCATTTTTAAAAGAACGCCAGTAAAAGAGATCTTACAAATACCAGAGAAACGGTATTGAACCTTCTTCTTTGATTAGAACAAATTACTTGATCTTCTTTTTTAAAAAAGAACTGAAAAATCAAAAACGATACATGAAGATGGTATGTAAGTTAGCTAAATAACTTGCTTAATTTCAAGAAAGGGGACTGTAAAAAATTCAGTTTACTCTACCATTATCTCCATTAACATATCAACTTTTAGATCGCAATGAAGAAGACTGCGTTCATAAA…	TTTCCCGTCAGTATGTGTAGTCATTACTTCAAACCTCGGATAAGCCCATCTTGATGGCTACGACTTCCATCTATATCAGAGGCTGACATTTTTCTCTCATTGACGGAGACGCCCTTTAACCGGACCTGATCATTTTTAAAAGAACGCCAGTAAAAGAGATCTTACAAATACCAGAGAAACGGTATTGAACCTTCTTCTTTGATTAGAACAAATTACTTGATCTTCTTTTTTAAAAAAGAACTGAAAAATCAAAAACGATACATGAAGATGGTATGTAAGTTAGCTAAATAACTTGCTTAATTTCAAGAAAGGGGACTGTAAAAAATTCAGTTTACTCTACCATTATCTCCATTAACATATCAACTTTTAGATCGCAATGAAGAAGACTGCGTTCATAAA…
RPL1B	S_Paradoxus	0.991139	0.0200319	TTTCCCGTCCGTACGTGTAGTCATTACTTTCAGACCTGTAAGCCTTTCCTGACGGTTGAAACTTTCTATCTGTATTTGAGGCTGACATTTTTCTCTCATTGACGGGCACGCCCTTTAACCGGACATTATCATTTCCAAAAGAACGGCTGGTAAATGTGATCTTATGAAAACCATAGAAACGTATAATGAACCCTCCTCTTTGACCAGAACAAATTAACTAACTCATCTTTGCTTTTTGAAAAGAACCAGAAAAAAAAAATGCAGAAAATATGAGATAATTGAGCAGTATGCTCAATTTCAAGAAGAGAAGAACTACCAAAAATTCAATTCGCCCCGCTATCCCACCCATTAACATCTCTCCTTTCAGGTTACGGTGAATAAAGCTACCTTCATTAACCT…	TTTCCCGTCCGTACGTGTAGTCATTACTTTCAGACCTGTAAGCCTTTCCTGACGGTTGAAACTTTCTATCTGTATTTGAGGCTGACATTTTTCTCTCATTGACGGGCACGCCCTTTAACCGGACATTATCATTTCCAAAAGAACGGCTGGTAAATGTGATCTTATGAAAACCATAGAAACGTATAATGAACCCTCCTCTTTGACCAGAACAAATTAACTAACTCATCTTTGCTTTTTGAAAAGAACCAGAAAAAAAAAATGCAGAAAATATGAGATAATTGAGCAGTATGCTCAATTTCAAGAAGAGAAGAACTACCAAAAATTCAATTCGCCCCGCTATCCCACCCATTAACATCTCTCCTTTCAGGTTACGGTGAATAAAGCTACCTTCATTAACCT…
RPL1B	S_Mikatae	1.10323	0.0303703	TTTCAACTCATAAAAGTAACCATTACATTCAAGCTCTTGTAAGCCTTTCTAATATTGCTGTTGACTTACATGTATATTCAGGATTTACATTTTTCTCTCATTGGCGGACAAGCATGATCCGAACGTAACTCTTTTAGAAGGAACAGCTGGTAAAGGAATCGTATGAAAATCTTGAAACGCATATAACTTTCTCTTGACAGAACAAATTGCGTGATCACGGTTTTATTGAGAAAACTGGAGCATTGGGAAATACAGTAGATAAGTCAATGGAGCATCTTGTTTCAATGCTAAGATGAGGAGAACATTTCGATATCAATTTACTTCACTATCATGCCCATAAAGCTAGGATAATTTAGGAAATGTGGACATAGTTATCTCGTTGACCTCATCACTGGTGTT…	TTTCAACTCATAAAAGTAACCATTACATTCAAGCTCTTGTAAGCCTTTCTAATATTGCTGTTGACTTACATGTATATTCAGGATTTACATTTTTCTCTCATTGGCGGACAAGCATGGTCCGAACGTAACTCTTTTAGAAGGAACAGCTGGTAAAGGAATCGTATGAAAATCTTGAAACGCATATAACTTTCTCTTGACAGAACAAATTGCGTGATCACGGTTTTATTGAGAAAACTGGAGCATTGGGAAATACAGTAGATAAGTCAATGGAGCATCTTGTTTCAATGCTAAGATGAGGAGAACATTTCGATATCAATTTACTTCACTATCATGCCCATAAAGCTAGGATAATTTAGGAAATGTGGACATAGTTATCTCGTTGACCTCATCACTGGTGTT…
RPL1B	S_Bayanus	1.05804	0.0201103	CATGATGTAATAGTTTCTCCTTTAACGGGCAACTGTTGGTTCTAAGCCCTTATATAGCTATAACACTTACTTAAATTTAGGAGACTACATTTTTCCCTCAATGGCGCACACGGCTTTAACCCGACGTAATCGTTTCATGATAACTAAAGCTTAGTGGATTGTTACCAGAATCCAAGAACATGTTCCAGAATCTACTTCTTCTTCCGGGACAGTATGCGTGCTCATTTAGTTCCATGAAGACTGTAAAAGCGGAAATGTGTTTAGAATAAGAATAACTGGCCCCGCCGCCTGGAGCCAACAATATAAAACCGACAAGCTACGGCAATCTGTCACTACTTAGATAAACATCTACCTTATAGGGGGTAAGGTCTGTCATACTCAACTCTCTTCACTATTGGG…	CATGATGTAATAGTTTCTCCTTTAACGGGCAACTGTTGGTTCTAAGCCCTTATATAGCTATAACACTTACTTAAATTTAGGAGACTACATTTTTCCCTCAATGGCGCACACGGCTTTAACCCGACGTAATCGTTTCATGATAACTAAAGCTTAGTGGATTGTTACCAGAATCCAAGAACATGTTCCAGAATCTACTTCTTCTTCCGGGACAGTATGCGTGCTCATTTAGTTCCATGAAGACTGTAAAAGCGGAAATGTGTTTAGAATAAGAATAACTGGCCCCGCCGCCTGGAGCCAACAATATAAAACCGACAAGCTACGGCAATCTGTCACTACTTAGATAAACATCTACCTTATAGGGGGTAAGGTCTGTCATACTCAACTCTCTTCACTATTGGG…
RPL10	S_Cerevisiae	2.84479	0.090675	TCACTTGTCTGTGTGTTTAACTGCCTTTCAATTCACCTCATCTCATCTCCCGCTACTTTCCATATATAAAAGCAAAATTAATTTGCTTTTTCCCCTGTCAGTATAAAAAAATTTTCCGCAGGATATAGAAAAAAAAGAAATGAAATTATAGTAGCGGTTATTTCCGTGGGGTGCTTTTTTACACCTGTACATCTTTTCCCTCCGTACATTTTTTTTATTTTTTTTTTTGGTTTTTTTTTTTCGATATTTTTCCCTCCGAAACTAGTTAGCACAATAATGCTGACTAAGGAAACTTTTCATCTCAGAATTGATGGTCAGTTTGGTTTCTCTAGAGAATAGTTTATAAAAAGATGTTGATGTGGAGCAACCATTTATACATCCTTTCCGCAAGTGCTTTTG…	TCACTTGTCTGTGTGTTTAACTGCCTTTCAATTCACCTCATCTCATCTCCCGCTACTTTCCATATATAAAAGCAAAATTAATTTGCTTTTTCCCCTGTCAGTATAAAAAAATTTTCCGCAGGATATAGAAAAAAAAGAAATGAAATTATAGTAGCGGTTATTTCCGTGGGGTGCTTTTTTACACCTGTACATCTTTTCCCTCCGTACATTTTTTTTATTTTTTTTTTTGGTTTTTTTTTTTCGATATTTTTCCCTCCGAAACTAGTTAGCACAATAATGCTGACTAAGGAAACTTTTCATCTCAGAATTGATGGTCAGTTTGGTTTCTCTAGAGAATAGTTTATAAAAAGATGTTGATGTGGAGCAACCATTTATACATCCTTTCCGCAAGTGCTTTTG…
RPL10	S_Paradoxus	2.87206	0.0609533	TACTTGTACGTGTGTTCAACTATTTTTCATTCACCTCATCTCATCTCACATTACTTACCATATATAATCGTAAATTTAATTTGCTTTTTTCCCCTGTCAGTAAGAAAAATTTTCCACAGAACAGAGAAAAAGAAATAAAACGGGAATAAAAGTCTTCCTGGGACTTTTCTGCACCCGTACCTCTTTCCCTCAGTACATTTTTATTTTTATTTTTATTTGTTTTTTGTATTTTTTCTTAAATTTTTTTCCAGTCCGAAAAGTGAATAGCGCAATGATGCTGACTAAGGAAACTTTTCACCTGAGGATTGATGGTGGATTTCTCTAGATGATAGTTTATAAAAAGAAGAAGTTAGTGCGAGCAACCATTTATACATCCTTTTCGCAGGTGTTTTGAGTTTG…	-
RPL10	S_Mikatae	2.90009	0.055315	TGCTTTTACGTTTGTTTAACCACCTTCTATTCATCTCATCTCATCTCATGGTCGCTATCTACCATATATAATTGCGAATTTCATTACATTTCTCCCTTTGCCGGCTAAAAAAAATAGAAAATTTTTTCCACAGAATGGAGAAAAAGAAATAAAACGGAAATAACAGTAGTTTCCGGGGACGGTTTTTAAACACCTGTACCTCTTTACATTCTTACATTTTGTGCTATTTTTTTTTCGTTTAGATTTGTCTCTGATCCGAATGTGATTCGAGTAATGATGCTGACTAAGGAAACTTTTCACCCAAGGTTTGAGAGTAAAGCTTCTCTAGAGGATAGTTTATAAAAAGAAGAAGTTCACAAGGAGCGACATTATACGTATTCTTTAGCAGTTGGTTTTATT…	-
RPL10	S_Kluyveri	0.992958	0.00798275	TATTACTATTTGTCAAAGCTTTGCGATACACACTAATTGGTATGTATTTTGGCGATGAGATGAGTTTCCTGGAAAATTTTCATCTTTACCTTATCGATAGAAAAAGAAATGGGGTTGTCCTGGAAGCCCTAAGGGGAGAGGAACATTTAGGGCATTCCGATGAGAAAATAGAGGTGACTTCAATAAATCCGTACACCATCAAGCCGCCAATACAAAAAAGGCAGTATGAAATTTGTGTATGGGTGCATTACAAAAAATGCAGGTAAAAATTTCGTTGGAAAAAAAGCGGTCAGTTCATGGCGGTAAGAAGCAAGCGCTCAGGGCTTTTCTGAGACAAATAATTCGCCTATTTCCACCCCCTCCAAAACAGCTCATCGTGTGCTGACAAATTCGGAAAAC…	-
RPL10	K_Lactis	0.365019	0.00831191	TTTCCTTTCTTACCTTCTCCTATATTTCTGACAGGCTGGTACCACAGATTAACTTAAACTATCAAACAAAACCAATGAGTATCTAAGTCTCATAGAGAAAGAGATTCAATGATGTGTGTTTGTACTTCTTTCTTCGCACTTGGCTTTATCGTAGAAACACCGAGTACATAAAATTTTCTGCAATATCATGTCTCGTCTCATCTCATCTCATCTCATCGACTTGGAAAAGAAATGAAATTTCAATCAGCATCACGTGCATAACAACGCATCTGGGACTGCTATCCCCAACACCCAGACACTATTACATATTGGCATTCAACATATTTTTATGATACAAAAACAACCACAATAGGAAATAGAGCACGTGATTAGTAACTATTTTCTTTGATTTGTTTTCAC…	-
RPL11	K_Lactis	0.385507	0.00799394	TGTAATAGGATGCGTATATAAATTGGATAAATCTTCCTCGTTTCAATTTATGACAAATTTAGTCCAAAGTTGATTCAAGTAGATGCTAAATCCTGATTGTATATTATGACTTCTTTCTTCTTCTTTAACTGTACCCTTTTGCCACTCAAGGCTCTAATTGTTTAAGTTCATATAATCTCAGAATGAAGGTTGTAATTCGGGTTTGATATCAACGATTGTATGGGACTGTCAAATGTGTAGGGTAACGATACATCATCCGTACATTCTCTAAAGTATCCAGAATTCCAAATTCATGGTGTACGGATGGTTAAATTAAAAGTGTGTACATGATATTATTACTATATAGGGTTATTTAGTCCGTGAGACTCATAACTCGCTGTGCGGTAAGGGCGATGAGAG…	-
RPL11A	S_Cerevisiae	0.884374	0.0247029	GTTTGTTTTTTTTTCCTTCTTTTCTTTCTGGTTTCTTTCTATCTATTCAATTTAATAGTAAATTTGTTATTCTCTTTTGAAAATTGATATATTGAAGCCTTTCTTTACAATTCACCTTGCATTATTGAAGGAGTGCTATTCTTCGTTTTGCCACCCTTTTGCTGTTTTCCCTCATATCACATAATACCCGGAGAGGCTCTTTCCTGCGACAGCGCAACATCCAACCATCCTAAAGGTATGGGTGTACTGACGATGCGATTATTTCATTAAGTTCTGTCTTTTTTGTATAAATGAAAAAAGAACGGTGAAATCCATAGAAATACAGAGAGCGACGCAAACAGCGCGCAGACTCTACGGGTAATAGACTCACATCCACGTGACCAGTTTCCAATCGAACTT…	GTTTGTTTTTTTTTCCTTCTTTTCTTTCTGGTTTCTTTCTATCTATTCAATTTAATAGTAAATTTGTTATTCTCTTTTGAAAATTGATATATTGAAGCCTTTCTTTACAATTCACCTTGCATTATTGAAGGAGTGCTATTCTTCGTTTTGCCACCCTTTTGCTGTTTTCCCTCATATCACATAATACCCGGAGAGGCTCTTTCCTGCGACAGCGCAACATCCAACCATCCTAAAGGTATGGGTGTACTGACGATGCGATTATTTCATTAAGTTCTGTCTTTTTTGTATAAATGAAAAAAGAACGGTGAAATCCATAGAAATACAGAGAGCGACGCAAACAGCGCGCAGACTCTACGGGTAATAGACTCACATCCACGTGACCAGTTTCCAATCGAACTT…
RPL11A	S_Paradoxus	0.902442	0.0230078	GCTTGCATTTTTTGTTTTTTTCGTTCCTTTCTTCTTTCTCTCTATCTTTTCAACTGGAAGGTAACAGTATAGCTCTCTACTAAACGTCAATACTTTATAATCGGCCTTTCTTTACAATTAACATCGTGTACTATGAAGGAGTGCTAGTCTTCGTTTTGCCACCCTTTTGCTGTTCTCCCTCACATCGCATAATACCCGGAGGATCTCTTTACCCAACGACAGCTCAACATCCAAACATTATTTGAGGTATGGGTGTATTATCAGTTCAATTAATTCATCACTGTGCCATCTTTGTAGAAATGAAAAGAGCTGTGAAATCTGCCAAAATATAGAGAGGGACGCAAAGACAGCGCGTAAACTCTACGGGTAATAGACTCACATCCACGTGATCAGTTTCTA…	GCTTGCATTTTTTGTTTTTTTCGTTCCTTTCTTCTTTCTCTCTATCTTTTCAACTGGAAGGTAACAGTATAGCTCTCTACTAAACGTCAATACTTTATAATCGGCCTTTCTTTACAATTAACATCGTGTACTATGAAGGAGTGCTAGTCTTCGTTTTGCCACCCTTTTGCTGTTCTCCCTCACATCGCATAATACCCGGAGGATCTCTTTACCCAACGACAGCTCAACATCCAAACATTATTTGAGGTATGGGTGTATTATCAGTTCAATTAATTCATCACTGTGCCATCTTTGTAGAAATGAAAAGAGCTGTGAAATCTGCCAAAATATAGAGAGGGACGCAAAGACAGCGCGTAAACTCTACGGGTAATAGACTCACATCCACGTGATCAGTTTCTA…
RPL11A	S_Mikatae	1.05223	0.0562801	TCTTGTTTATTATGTTCCTTTTATTATTTTCTAACTTTCCCGTTAATTTGAAAGTACCAATATAGCTCTCTATCAACTCCTGAAATATTCAACTAAGGACAGACGTTCTTGCTACAGTTGTCATTTAGCAATTTGAAGAAGAGAGCTTCTCTTTATTTTGCCACCCTTTTGCTGTTCTCCTTCATATCGCATAATACCCGGAGAAGATACTTTCTCTCGACAGCTAAACATCCATACACCAAAAGGGCATGGGTGTTCACTGGTCATCTTGATTTTTGTTTTGCAGGAACTTCCTCAAGAAATAAAAAAGTTCAGGCATAAATCGCCGGAAAGTAGAGAGCGACGCAAAAGGAATGAGGCATCTCTACGGGTAATGGACTCACATCCACGTGATCAGTT…	TCTTGTTTATTATGTTCCTTTTATTATTTTCTAACTTTCCCGTTAATTTGAAAGTACCAATATAGCTCTCTATCAACTCCTGAAATATTCAACTATGGACAGACGTTCTTGCTACAGTTGTCATTTAGCAATTTGAAGAAGAGAGCTTCTCTTTATTTTGCCACCCTTTTGCTGTTCTCCTTCATATCGCATAATACCCGGAGAAGATACTTTCTCTCGACAGCTAAACATCCATACACCAAAAGGGCATGGGTGTTCACTGGTCATCTTGATTTTTGTTTTGCAGGAACTTCGTCAAGAAATAAAAAAGTTCAGGCATAAATCGCCGGAAAGTAGAGAGCGACGCAAAAGGAATGAGGCATCTCTACGGGTAATGGACTCACATCCACGTGATCAGTT…
RPL11A	S_Bayanus	0.965024	0.0289148	GCTTGCATTTCTATTTGTTATATTCGTTCCTTTTATCTTTATATCCTTCTAACTTAAAAGCACCAGTGCAACTCTTTGTCCAACCTCGAATGCCAAACAATCAATATCCTCTTTAATGTTGTCATCATACACTTTGAAGGAGAGCTACTCGTTATTTTGCCACCCTTTTGCCGTTTTCACAAATTACTTATTACCCGGTTTAACTCTTCCGAGACTGTATTAATACATCCGTACCTCAAAATGTATGGGCTTAAAATAAGATTTATAAACCAAAAATGGACGCTCTTCGGAAATATTCATGAATCTGATTAAGCGAGATTATAGGCTGCAATCTACCAGATTTGGAGACCGACGCAAAGAAACGCTTGCTTTCCGACGGGTAATGGACTCACATCCACG…	GCTTGCATTTCTATTTGTTATATTCGTTCCTTTTATCTTTATATCCTTCTAACTTAAAAGCACCAGTGCAACTCTTTGTCCAACCTCGAATGCCAAACAATCAATATCCTCTTTAATGTTGTCATCATACACTTTGAAGGAGAGCTACTCGTTATTTTGCCACCCTTTTGCCGTTTTCACAAATTACTTATTACCCGGTTTAACTCTTCCGAGACTGTATTAATACATCCGTACCTCAAAATGTATGGGCTTAAAATAAGATTTATAAACCAAAAATGGACGCTCTTCGGAAATATTCATGAATCTGATTAAGCGAGATTATAGGCTGCAATCTACCAGATTTGGAGACCGACGCAAAGAAACGCTTGCTTTCCGACGGGTAATGGACTCACATCCACG…
RPL11B	S_Cerevisiae	1.51871	0.025247	AACCAGCAGAAAAGAACAAGTTACCATACTAATTAATCTCTTTTAATTAATGCGTGGACAGATAATCATTTCTGTTCCCTCACTCTGAAAAAATTGTTTTATTTTCCTATTTTTTTTTTCATCTATTATTGTATTTTGCCCTCTCCTCACTCCTTACTTTAGTCTATTATCAATATCTCTTCCCCCTCCTAAATATGTACTCTTTTATTTTTTTTAATTGTGAAGGAACAATTCAAGTTAGAACTCTTTTGATAGGAAACATTATTTCCTGTGTAGCCTAATGTTTAATGCCTAATTTTTTTCTAAAATGCAGCAACATACATATGTTGAGTCGTATAGACATCTATATATAACAAGCACAGAACCGTCTAATTGGTATTTTTCAGGACATTTTAAACA…	AACCAGCAGAAAAGAACAAGTTACCATACTAATTAATCTCTTTTAATTAATGCGTGGACAGATAATCATTTCTGTTCCCTCACTCTGAAAAAATTGTTTTATTTTCCTATTTTTTTTTTCATCTATTATTGTATTTTGCCCTCTCCTCACTCCTTACTTTAGTCTATTATCAATATCTCTTCCCCCTCCTAAATATGTACTCTTTTATTTTTTTTAATTGTGAAGGAACAATTCAAGTTAGAACTCTTTTGATAGGAAACATTATTTCCTGTGTAGCCTAATGTTTAATGCCTAATTTTTTTCTAAAATGCAGCAACATACATATGTTGAGTCGTATAGACATCTATATATAACAAGCACAGAACCGTCTAATTGGTATTTTTCAGGACATTTTAAACA…
RPL11B	S_Paradoxus	1.85017	0.0625229	ATTGACAAGAAAAGAACAAGCTATTATACTAATTAATCTCTTTTAATTAATGAATGGACGGATAAACATTTCTGTTCGCTCATTTTGAAAAAAACTGTTTTATTTTCTATTTTCTAATCATTTTCTTTCTATTTTCTTTTTTTTTCATGCGTTATTGTATTTTGCCCCCCCACTCCACTTCTTACTTTTAGTCTATTATTAATATCTCTCCCCCTAACTATGTACTCTTTTATTTTTTTAATTGTGAAGGAACAATTCAAATTAGAACTAATTTAATGGGACAGCCTTGTTTCCTGCATTTCAGACTATCTCAGCTGTGTTTTTTCCTATCGACTCTAGTTCCACTTTACTTTAATTGTTTTCCATTTCTCCCTTAGTTTTCAATAGTGTCTTCTTTGA…	ATTGACAAGAAAAGAACAAGCTATTATACTAATTAATCTCTTTTAATTAATGAATGGACGGATAAACATTTCTGTTCGCTCATTTTGAAAAAAACTGTTTTATTTTCTATTTTCTAATCATTTTCTTTCTATTTTCTTTTTTTTTCATGCGTTATTGTATTTTGCCCCCCCACTCCACTTCTTACTTTTAGTCTATTATTAATATCTCTCCCCCTAACTATGTACTCTTTTATTTTTTTAATTGTGAAGGAACAATTCAAATTAGAACTAATTTAATGGGACAGCCTTGTTTCCTGCATTTCAGACTATCTCAGCTGTGTTTTTTCCTATCGACTCTAGTTCCACTTTACTTTAATTGTTTTCCATTTCTCCCTTAGTTTTCAATAGTGTCTTCTTTGA…
RPL11B	S_Mikatae	1.26508	0.0412573	TACTTTTAGTCTATTATTAATATCTCTTCCTAACTATGTACTCTTTTATTTTAGTCGTGACATGGAACCACTTAAATCCAAACTATCAAACTACCAAACTACTTCACAGGAGGCATCGTTTCCTGTGTCTCGAACCATCTCAACTGTGTTCTGTGAATTCTAATTTCACTTTACTTTAATTTTTACTATATTTTACTTTTCCTCTCTGTTGGTGTTCAAGTGTATTTTTCCTTTATTCTTCATCACCAGAATAATATGTACCTTCATCTCTACCGCATGTGTAGAACTAATGTTTAATGTAATTTTAATGCAGTGTACGCTAAGTGATTTGCTTTATATTATAACAAGTGCAAATTATGAGGTACAAATATTGTTGCATTTATCAGGACGTTTCACACA…	TACTTTTAGTCTATTATTAATATCTCTTCCTAACTATGTACTCTTTTATTTTAGTCGTGACATGGAACCACTTAAATCCAAACTATCAAACTACCAAACTACTTCACAGGAGGCATCGTTTCCTGTGTCTCGAACCATCTCAACTATGTTCTGTGAATTCTAATTTCACTTTACTTTAATTTTTACTATATTTTACTTTTCCTCTCTGTTGGTGTTCAAGTGTATTTTTCCTTTATTCTTCATCACCAGAATAATATGTACCTCCATCTCTTCCGCATGTGTAGAACTAATGTTTAATGTAATTTTAATGCAGTGTACGCTAAGTGATTTGCTTTATATTATAACAAGTGCAAATTATGAGGTACAAATATTGTTGCATTTATCAGGACGTTTCACACA…
RPL11B	S_Bayanus	1.41896	0.0296806	AATCATCAAGAAAAGAACGTATTAATTAATCTCTTTTAACTAATGAATGAGCGGAAAAACAGCTTTTCCCTCCTCAAAAAAACAACCGTTTTACTTTTTATTTTCTGACCTTTTTTTTTCTTTCTGTATTTTTCTTTATTTTATTGAATTTGCCTTCCCTTCCCTCTTACTCTTAGTCTATTAATAATATCTCCCTAAACTATGTACTCTTTTATTTTTTAATCGTCACAGAGAACAGTTTAAATTTTGAACTATTTTTACAGGAGAGTATCATTCCCTGCATCTAGAACAACTTTTCTACGTTTTCCTATCAATTCTAACTTAACTTAATTTCAATTATCCTTACTTTTTTTCCATCAGTGTGAGTTCCTACCATACGTGGCTCTAATATATTAATGT…	AATCATCAAGAAAAGAACGTATTAATTAATCTCTTTTAACTAATGAATGAGCGGAAAAACAGCTTTTCCCTCCTCAAAAAAACAACCGTTTTACTTTTTATTTTCTGACCTTTTTTTTTCTTTCTGTATTTTTCTTTATTTTATTGAATTTGCCTTCCCTTCCCTCTTACTCTTAGTCTATTAATAATATCTCCCTAAACTATGTACTCTTTTATTTTTTAATCGTCACAGAGAACAGTTTAAATTTTGAACTATTTTTACAGGAGAGTATCATTCCCTGCATCTAGAACAACTTTTCTACGTTTTCCTATCAATTCTAACTTAACTTAATTTCAATTATCCTTACTTTTTTTCCATCAGTGTGAGTTCCTACCATACGTGGCTCTAATATATTAATGT…
RPL12	S_Kluyveri	1.49298	0.0269443	GCACACAGACTCACAATATACATTTTATTACGAAATCCAAGATGTAAGCAGCAGCAGATCACGTGATGTTACACCCACTTTTGGGGGTATTATTGGTTTTGTGACCAGTCTCGATTTTGTCAGTAGAAAACTAGATTAGATTTTTCTAAAAAAGAAAAATCGGGTTCACGTGACTTTTGGTAGACTGCTTTTTCAATTTTTAAGCCCAGACATGTTATGGCCATTTGGAAATTTTTATTCCACCCTTTCCCACTCCTACAAAAAAATTGTTTGCTGGTATGTGTGGGTTTTTAATGTGAGATGGGTCGAGTATGTCACGATATGTAGTACAAAAGAGAAGCAAAAGATGGCAGTAAAAAACAGGTACAATCACTGGCCTTATAGATAATACTACGGCTA…	-
RPL12	K_Lactis	0.918909	0.0252627	TGGTGATATTGCATGTATATAAACGGCCATATAGAAATATCAGTGTACATCTGAATCGGTAATTGTATGAACCCTAATTTACCTGTGTGATAGTGACCGTGAAGGGTTCACAGACGAAAATAAACAAGAAAACATGAGACTGTGCAACATCAGTGCCTCCATATATTTTGTATAATATGTATGGGTGTATTTTCATTCCCCTTAAAAAAGTTCCCGAAAGAGAAGTTTTGAGAGAAATCCTGATATCACGTGACATAGGCATATTATTCGATTCCCTGCGTAATCCCAGCCAAAGGACAAGACCAAAAGCACTACCAAGCAGGCCTCATTAGATGTGCAACGATCTCAGCTCTGCGAGCAACTTTCTGGCCCATACTCTCTTACTTTTGTTCCGTTCTT…	-
RPL12A	S_Cerevisiae	0.892187	0.0453572	TCTGGAATTTACCCTAACTGTACAAAATATATTTAGCATTATATACCCGCTATTTAATTATTATAAAGGAGACCTTTATACTCAAACAAATGAAGCCACCTTATGCCATTATCCCATTCGTACCAGTCTAAAACAAGATAAATACCCTGTTTAACATCCGAACACCAAATATGTGTGGGTGTCAAACAAAGAGACAATGTAATGAGACAATGTACTGCTTGTAAACTATAACAGTATCAGCTCAATTTCAATGCCATCTACTCCAGATATCGTTGCGATTGTACCTACAAGCCGCCTACAACGGCGTTATTGTTGTAAGCTGGTAAAATGCAGTGCGTTCCCCCGTTGTGAGTTCGGGCCAAACTTACTTGGCTGGGAGTTCCGTCCGTACAGTTGTGG…	TCTGGAATTTACCCTAACTGTACAAAATATATTTAGCATTATATACCCGCTATTTAATTATTATAAAGGAGACCTTTATACTCAAACAAATGAAGCCACCTTATGCCATTATCCCATTCGTACCAGTCTAAAACAAGATAAATACCCTGTTTAACATCCGAACACCAAATATGTGTGGGTGTCAAACAAAGAGACAATGTAATGAGACAATGTACTGCTTGTAAACTATAACAGTATCAGCTCAATTTCAATGCCATCTACTCCAGATATCGTTGCGATTGTACCTACAAGCCGCCTACAACGGCGTTATTGTTGTAAGCTGGTAAAATGCAGTGCGTTCCCCCGTTGTGAGTTCGGGCCAAACTTACTTGGCTGGGAGTTCCGTCCGTACAGTTGTGG…
RPL12A	S_Paradoxus	1.03758	0.034618	CCCAAAGTCTACCCCAACTGTACACAGTATATTTAGCATTATATAGGCGCTATTCAATTACCATAAAGGATTCATTTTCCTCTATACGCAAAGCAAATAGACCACCTCTGCACTGTTATCAATTTAATACCAAGTGAATTCCTGCTCAACATCCGTGCACCAAACATGTTTGGGTGGTAAATAAACAAGATTTTAGACAGAAGCAGTGTAATGAGAAGGAAGTACTGATTGTAGACTACAGTGGTATCAGCTCAATTCCATGGTCATTTCCTTCGAAATGTGGCAGCGATTGCCTCTACAAGCAGCCTAGTTGTGCAGATTGCAATGCGTTCCCCCCTTGTGAGTCTAGCACAAAATCTTGCTAGGCAGGGAGATTCGGCCGGTATAGCTTTTGGCTCT…	CCCAAAGTCTACCCCAACTGTACACAGTATATTTAGCATTATATAGGCGCTATTCAATTACCATAAAGGATTCATTTTCCTCTATACGCAAAGCAAATAGACCACCTCTGCACTGTTATCAATTTAATACCAAGTGAATTCCTGCTCAACATCCGTGCACCAAACATGTTTGGGTGGTAAATAAACAAGATTTTAGACAGAAGCAGTGTAATGAGAAGGAAGTACTGATTGTAGACTACAGTGGTATCAGCTCAATTCCATGGTCATTTCCTTCGAAATGTGGCAGCGATTGCCTCTACAAGCAGCCTAGTTGTGCAGATTGCAATGCGTTCCCCCCTTGTGAGTCTAGCACAAAATCTTGCTAGGCAGGGAGATTCGGCCGGTATAGCTTTTGGCTCT…
RPL12A	S_Mikatae	1.1045	0.0142301	CAACTCTTAATCTACATCACCTATACAAGAGCGTATTTAACACTCTATAAGCTATATTATTTATCATGAATAATTCGATTTTTCTACATGCAAGATGAATAGATTACTTATACACCTGAGTCAAAAAATGTCCTGCTAAACATCCGTACATCAATAGGGATTGGGTGTAAACACAAAAGGAGGTAGGAGAGAACTCCAATATAACCCAAAGGAACTACTATAAAATGTCTAAGTACAAGATTAACTCTGTGGTCATTTGCTTTCACATATAGCAGCTGTTGCCCTCGTTAGTCCGCCTACAACGGCTTATTGTTTCATACTGATAGAAACTGCTATGCGTACGCTTGTAGTGAGCCCGCAACAAAAGCCTCCTAGAAAGAGGCTCGAGCCCGCATCGCT…	-
RPL12A	S_Bayanus	1.09386	0.0424239	GCCGCAAATGATCCTAAATAGAAATCAAAAGAGGAGCAACCGTACATGTAACTATTTACCACTATATACACACCATTTACATAGCATAAAACATCCACGGCCATCTGTACGCCAAATAAACAGTTGACTACATAGGATCGCATTAAGATAATTTCCTGCCTAACACCCGTACAGTTCAAAGATGAATGGGTGCCTATCATTTTTTTTCAAGAAAAGAAAAGAAGTCCAAAAAATGATTTTGATAAATTGACAACATTGGGCGAGCGATACTAGTTTTTCTTTCCAGATTTCTGCAGCAGCAAAATACTGAATTGAATAGCGACTGGCCCAAAACAAATTTTTTAGGCGGGCAATTAGGCTCGCGTCGTCCTGCCGTTCTGCCTGGACCAGCTGGCATCT…	GCCGCAAATGATCCTAAATAGAAATCAAAAGAGGAGCAACCGTACATGTAACTATTTACCACTATATACACACCATTTACATAGCATAAAACATCCACGGCCATCTGTACGCCAAATAAACAGTTGACTACATAGGATCGCATTAAGATAATTTCCTGCCTAACACCCGTACAGTTCAAAGATGAATGGGTGCCTATCATTTTTTTTCAAGAAAAGAAAAGAAGTCCAAAAAATGATTTTGATAAATTGACAACATTGGGCGAGCGATACTAGTTTTTCTTTCCAGATTTCTGCAGCAGCAAAATACTGAATTGAATAGCGACTGGCCCAAAACAAATTTTTTAGGCGGGCAATTAGGCTCGCGTCGTCCTGCCGTTCTGCCTGGACCAGCTGGCATCT…
RPL12B	S_Cerevisiae	1.81733	0.0944718	TTTTTGGTGCGGCCTTCTGCAATTACTGATTAAGTAGCAATTTTCCTTCAAACATCCGTGCACTGTGGATGTTTGGGTTGTGTATTTTGCTTTCATAACATACAGATATTTTGTTTAAGGAAGTGAAATAAACAATATCATAAAACAGGTACTTCATAGACCATAAAGCATAACCCAGATTATCCTCTTAGATAGCAATGCTAATGTAAACAGAGATCCGTTTGCGTGACTTTATACTAATATGATATGTCTACTTCGCTTTGTGTTCGAGCAGCCTGGCAGTCCCCTCTAGCCGCTTTTTTCCCTTTCCGAAGGTTTCCGCCTAAGCCCCCTGGCTCTAGGCCGAGAAAATGTTAATGCTCCTTCTACGAGAAAATGCTTGTCGCCACACCAGGACAG…	TTTTTGGTGCGGCCTTCTGCAATTACTGATTAAGTAGCAATTTTCCTTCAAACATCCGTGCACTGTGGATGTTTGGGTTGTGTATTTTGCTTTCATAACATACAGATATTTTGTTTAAGGAAGTGAAATAAACAATATCATAAAACAGGTACTTCATAGACCATAAAGCATAACCCAGATTATCCTCTTAGATAGCAATGCTAATGTAAACAGAGATCCGTTTGCGTGACTTTATACTAATATGATATGTCTACTTCGCTTTGTGTTCGAGCAGCCTGGCAGTCCCCTCTAGCCGCTTTTTTCCCTTTCCGAAGGTTTCCGCCTAAGCCCCCTGGCTCTAGGCCGAGAAAATGTTAATGCTCCTTCTACGAGAAAATGCTTGTCGCCACACCAGGACAG…
RPL12B	S_Paradoxus	1.72656	0.0203073	TTCTTACTACAACCATCCACGATTACTGATCAGCCAACAATTTTTCCTTTTTCCATCCGTACATACTCGGTGTTTGGGTTGTGAAACTTTGCTCCAATAATATACCTGCTTTGAGGTTTAAGTATGCAAAATATATATATATATGTATATATATCATGTAATAGGGCTTAACAGACTATGAAGCATGATCCAATAATCCTATTGGAGAGCGACGCTAATGTAAACAAGGATACGTTTAGGTGTCTTTGTACCAATACGATATTATTACTTCGCTTTGCCTGTGAGTAGCCCGCACTTCCTTCTGCTCGCTCTTTTCCTCTCCGAAGGTTTCCGCCTAAACCGCCTGGCTCTAGGCGGAGGAGATGGTAATGCTTCCCCCACAAGGAAATGCTTGCCGCC…	TTCTTACTACAACCATCCACGATTACTGATCAGCCAACAATTTTTCCTTTTTCCATCCGTACATACTCGGTGTTTGGGTTGTGAAACTTTGCTCCAATAATGTACCTGCTTTGAGGTTTAAGTATGCAAAATATATATATATATGTATATATATCATGTAATAGGGCTTCACAGACTATGAAGCATGATCCAATAATCCTATTGGAGAGCGACGCTAATGTAAACAAGGATACGTTTAGGTGTCTTTGTACCAATACGATATTATTACTTCGCTTTGCCTGTGAGTAGCCCGCACTTCCTTCTGCTCGCTCTTTTCCTCTCCGAAGGTTTCCGCCTAAACCGCCTGGCTCTAGGCGGAGGAGATGGTAATGCTTCCCCCACAAGGAAATGCTTGCCGCC…
RPL12B	S_Mikatae	1.72626	0.0444593	ATTTCCGTCGCCCATGGTTATCGAAATTCGTGAAAAATTTCCTTTTCCATCCGTACATATTGGGTGTTTGGGCTGTCATGGTTAGTCAAAACGATATGCACGCTCTTTAGTTCTACCACGAAAACAATATAATATCATATAATAGGTACTTCATACATCATGAGACAAAGCTCCATTTAAGCTTATCTTATAGCAACGATAATGCGAACAGAGTTCTGTTCAGGCCTCTTTCTACCAATATGGTATGTCTACTTACCTTTGCGTGTGAACAAGCTCGAAATTTCTTTCCAGCACTCTTTTTCACTCGGAAGGACTCCGCCTAAACCACCCAGCTCTAGGCGGAGGAGATGTTAATGTTCCTTCCACGAGAAAATGCTTGCCGCCGCATCAAGACAAATG…	ATTTCCGTCGCCCATGGTTATCGAAATTCGTGAAAAATTTCCTTTTCCATCCGTACATATTGGGTGTTTGGGCTGTCATGGTTAGTCAAAACGAGATGCACGCTCTTTAGTTCTACCACGAAAACAATATAATATCATATAATAGGTACTTCATACATCATGAGACAAAGCTCCATTTAAGCTTATCTTATAGCAACGATAATGCGAACAGAGTTCTGTTCAGGCCTCTTTCTACCAATATGGTATGTCTACTTACCTTTGCGTGTGAACAAGCTCGAAATTCCTTTCCAGCACTCTTTTTCACTCGGAAGGACTCCGCCTAAATCACCCAGCTCTAGGCGGAGGAGATGTTAATGTTCCTTCCACGAGAAAATGCTTGCCGCCGCATCAAGACAAATG…
RPL12B	S_Bayanus	1.55319	0.0336507	CTTTAGTAACTACCGTTGCCCGTAGTTACCAATAATTATTTTTCCTTCATGTACACCCGTACATACATGGTGATTGGGTTGTCGAAACCGGTCCAAATAATTTCTTTCACTATAGCTATACAAGAAGAAGGAGTTCCCATGAAACAGTTATCTGGTTAATGCAGGAGACCTCTTCCTATGAAGCGTGCTTAATATCGCGTAGAACTAAGTCTACTGCCAATGCACCTAAGCTCTCCTCTAGTGTCTTTGTATCGCCGTAGTATTTTGCTTTCCCTTCCGCGCAAACGGCGTGTCTCCCTCTAATTGTTCCTTTTCCTTCCGGAGGCGTCTGCCTAGACAGGCGGGCTCTAGGCAGACAACGCCTGGCTGCTCCTTTCACAAAGAAATGCGCGTTGCCGC…	CTTTAGTAACTACCGTTGCCCGTAGTTACCAATAATTATTTTTCCTTCATGTACACCCGTACATACATGGTGATTGGGTTGTCGAAACCGGTCCAAATAATTTCTTTCACTATAGCTATACAAGAAGAAGGAGTTCCCATGAAACAGTTATCTGGTTAATGCAGGAGACCTCTTCCTATGAAGCGTGCTTAATATCGCGTAGAACTAAGTCTACTGCCAATGCACCTAAGCTCTCCTCTAGTGTCTTTGTATCGCCGTAGTATTTTGCTTTCCCTTCCGCGCAAACGGCGTGTCTCCCTCTAATTGTTCCTTTTCCTTCCGGAGGCGTCTGCCTAGACAGGCGGGCTCTAGGCAGACAACGCCTGGCTGCTCCTTTCACAAAGAAATGCGCGTTGCCGC…
RPL13	S_Kluyveri	1.07216	0.0124298	AGTTACTACAGGGCTACAGGCCGTAATGCTAGGCAGAGATCATTACGCAGGCATCACGAAGCTAGGCGGAGGAGTTGCTGGCTGTGCTTCAACGTAGGTAGGGGCAAAGCCTGAGGCCGGGGGCAGTCTGCCAGGCTCCCAGGGTCGAGGAGCTCTGCCTACGTGGGGGAGTTCGGGAGGAAGCCCCCCTCCCCCTGTGCGCAGGAGTCTTCCGCTCATAGAACCAGGTAGCTTCACAACGATGCGTGCGCCCTTTCTACACCGACTCATCAGACAGTCATCAAAATAATGTGCAGACGACTTCTGATGTATATATTGAGGTGTACTGGCTCTCCAAACAACTCCCCCTTTGTATGTATGGGTTTATTCTGTCGCACGTTCCGGGTACGTCAGGAATCT…	-
RPL13	K_Lactis	1.35074	0.0178196	AATTCTAACAAACTTCCAAGGGTAGAAACCTCTCAGCCAGAGAGAGGTGGGAACCACGGTCGCCTCAGAGTACACCAGAGGCTCACCACTATGCTGAGACGGTGTGTTTGGGTTGTGTCCGAGGACCTTGTGAAACTGGCGGCGCCCATGGTACGAAGGTTACTACGGATGGTTACCTGTGGTGGAAGAGGAATTGCCTAGGAACAGTCCATCCCCACCTAGAGATAGAGTTTCCAGGCTGGAATTGCGAACTGGATTCCTGCCTAGAGTGGCGGAGCCACCAGCCTGTTGCCAGCAATGGAATTCGGAAAGAGAGAAATGAACCGAGCTCGTCGTAGACCCCGTTTCGTTCGAATAAGAGTGTCAGTCTTTCCTTATGAGGGAATTTGTATTTATAAC…	-
RPL13	Y_Lipolytica	0.00690569	0.00933299	TGTCGTTGTGTGTGTTTGCAACTTTTCGAAATTTTCAAGACGAAGGTAAACTGCAAAGTGTGTGGGTCGCGGGCCACGCACTGCGTGGGAGCACATCCCAATCGGGAAGAAAGTCAAAAAAGGCAGTCATATCATGTGACCCAGATGGGAGGAATGGGAAGGTCGGTCATGTGACCATGCCACCCACAACAGCGACTTGGTAGTAAATGTCTGTGTAAATACACTAAAATTACTGTGCGGGACTGGTATTATAAAAAAAATAAGAGTATACTCATTGACGAGATAAACAGTTGCCAAATAAGGTGGAATTCTGGTCATACTGTATACAGTGTCAAATAAGGTATGTATCTTTTCAGCTTGGACGGAGTTGTAACTACAATAAATATTGGAAACGTCATT…	-
RPL13	S_Pombe	0.113796	0.00343269	GGTTGGCTCCTGTATAAGCTCTAGCACATTCAGAATGGGTTACTGTAGTGTTGCGAAAAAAAGCAGTCACGTTTGTGTTGACTACGAAAAAAAGTCCTCACCACCGAGCACCAACTTACCTTCCACACCAACTCACCTGAACCACC	-
RPL13A	S_Cerevisiae	1.12369	0.00734	CTTGTTGCTTATTCTCTTGCTGTATTTTTCGAAACACTGCTAAATAAAAAGGTATATATTAAATAGTCTACTGCGTAACCTATACATTTTACATGGCATTTACTTTTGACTTTGCCAGTGTTACTCTCTGCGCTAGGATAATATTCGGTGGTATAGGCTCACGCGGCCTGGCCGGAACGAACTGCTACCAGTTCTGTTTCCCTCAGCTAGAGGGAAACAGAGAGAATTTCCGCCCAGGTCAAAGGCCACAGCATCCTTCTAGAGGAGGAGCGACAACCTAAGGAAAATTCAGTTTTTCCTAGATCGCATACATTTTTCAACCACTTTTTTTCACAATGCATTATTTTTCAACATGTATGGGTGTTTTTTCTGAATATCAGACTCTTTTATGGAGTAAAA…	CTTGTTGCTTATTCTCTTGCTGTATTTTTCGAAACACTGCTAAATAAAAAGGTATATATTAAATAGTCTACTGCGTAACCTATACATTTTACATGGCATTTACTTTTGACTTTGCCAGTGTTACTCTCTGCGCTAGGATAATATTCGGTGGTATAGGCTCACGCGGCCTGGCCGGAACGAACTGCTACCAGTTCTGTTTCCCTCAGCTAGAGGGAAACAGAGAGAATTTCCGCCCAGGTCAAAGGCCACAGCATCCTTCTAGAGGAGGAGCGACAACCTAAGGAAAATTCAGTTTTTCCTAGATCGCATACATTTTTCAACCACTTTTTTTCACAATGCATTATTTTTCAACATGTATGGGTGTTTTTTCTGAATATCAGACTCTTTTATGGAGTAAAA…
RPL13A	S_Paradoxus	0.861552	0.0126716	CTTGTTGCTTATTCTCTTGCTGTATTTTTTCGAAGCACTGCTAAATAAAAAGGTGTATATTAAATAGTCTACTGCGTAACCTATACATTTTACATGGCATTTACTTTTGACTCAGCGAGTATTACTCTCTGCTCTATGACAGAATCGGCATTCTAGGCTCACGCAGCCTCGCTGAAACTTACTGCCTGCCAGTATGTGTTCCCCTCCAGCGTTAACCAGCTAGAGAGAATCTCCGTCTAGGGAAAATGAGCCATACTCTCATTCTAGAGGGGAGGCGGTAATCTAAGGAAAATTCAACTTTTTTTAGATCGTATGTACTTTTTCAAGCGTTTTTTTTTTTCATAGAGCATTATTTTAGCATGTATGGGTGTTCTCTCAATAACTGGCTATCCTTCACCG…	-
RPL13A	S_Mikatae	1.04757	0.0239639	CTTGTGCTTATTCTCTTGCTGTACTTATTCAGAATATTACTAGAAAAAAAGGTATACACTAATTACTGTGCTGCGTAACCTATACATTTTACATCACACATACCTTTGACCTTGCAAGTGCTACTCTCTGGGCCACTACAACTGTCCATCGATAGTCTAGGCTCATGCAGCCTCTCTGGAGCATACAGCTGTCAGTAGTGTCTTTCCTTACAGCAGTAACAGGCAGTAAGCTTCGCCTACGAAAAGGCGACGTCCTAGAGGGAAAGAAGCCGCCTGGAAAACTTAACTGCTCCTTGGTATGCAAGCATTTTCTTGAACATTTTTTTTTCGTAGTACAGTATTTATTACATGTATGGGTGTTTTTAGAATACTTGATAGTCTTTAAGCAGAGAAAACATG…	-
RPL13A	S_Bayanus	0.937963	0.0233034	CTTGTGCTTATTCTCTTGCTATATTTGTTCGAAAAACTACTTAATAAAAAGGTATATATTAATTAACCTACTACGTAACCTATACATTTTACATCGCATTTACTTTTGACTTTGTCAGTGTTGCTCACTGAGCTCCGAGAATTGCCCTTCCAGATTCTAGGCTCATCCAGCCCAGCTGCACCATGCGATCCCCTGGAGGAGCCTTCCTTCCAGCTGGAACGAACTGGGTTCAGCCTAGCCTCGGAAAGAGACGATATTCTCCTTCTACGGAGCAAGCCGCTCCCCTGAAAAACTCAACTTTTCTCAGTCGAAGTGAATTTTTTCAATATAATATTTTTATTCGGTATAAAACTGTTGTTTGTATGGGTGTTTCAAAAAAGCCAGTGCAGCTTATAGTGT…	-
RPL13B	S_Cerevisiae	1.63325	0.00993981	TTGGGATTCTTCTCTTGTATACTTTACTATCTACCTTTATTTATGAGGCTTCCTTTACAGAGTTCAGAATTTGTAGGCTATTTTTATGTATATCCTTGCCCTCTCAGTTGTTGCAGCGAGTTCACGATAGTTTGCGCTAAGCGGTAACTCTTGGAATTCCAGCAAACTGCCAATCGTCCGCTGTGCTAAACTGGACGGGAGTCAAGGAAAATCAAGCGTCAATTACTTTTCTTACCAGGCCGCCAACAATTTTTATATACGGCCTTAGCATTTTCCATTTCCGAGATGATTTTATAATGTATGGGTGCCAATATGTACTGATGTTTAAGTAATACGGTGAGATTATCTTGAAAAAGATTTTCAGTGCCATAAAATCTGTACATTACGCACCCATACATT…	TTGGGATTCTTCTCTTGTATACTTTACTATCTACCTTTATTTATGAGGCTTCCTTTACAGAGTTCAGAATTTGTAGGCTATTTTTATGTATATCCTTGCCCTCTCAGTTGTTGCAGCGAGTTCACGATAGTTTGCGCTAAGCGGTAACTCTTGGAATTCCAGCAAACTGCCAATCGTCCGCTGTGCTAAACTGGACGGGAGTCAAGGAAAATCAAGCGTCAATTACTTTTCTTACCAGGCCGCCAACAATTTTTATATACGGCCTTAGCATTTTCCATTTCCGAGATGATTTTATAATGTATGGGTGCCAATATGTACTGATGTTTAAGTAATACGGTGAGATTATCTTGAAAAAGATTTTCAGTGCCATAAAATCTGTACATTACGCACCCATACATT…
RPL13B	S_Paradoxus	1.43833	0.0173919	TTGGGATTCTTCTCTTGTATACTTTATTATCTACCTTTATGTATGAGGCTTCTTTAACAGAGTTCAATTTTGTAGGCTATTTTTATGTATATCCTTGCCCTCTCAGTTGTTGCAGCAAGTTCACGATAGTTTGCGCTCTAAGCGGTAACTCTTGGAATTCCAGCACACTGCCAATCGTCCGTTCCGCTGGACTGAAAGGAAGTCAAAGGAAATTGAGCGTCATTTTACTTTCTTCCTTCCCTACGGAACCGCCTACAATAGTTAAAAAAAACCTTAGCTTCATTCTTTTTCGAATAATTATATACAGTGTTTGGGTGGGAAAATGTACCGATGTTTATTCTTTTTGTGAAATTTTTTAAAGGTGTTTTTCACCCTTAACATCTGTACATTATAAACCCA…	TTGGGATTCTTCTCTTGTATACTTTATTATCTACCTTTATGTATGAGGCTTCTTTAACAGAGTTCAATTTTGTAGGCTATTTTTATGTATATCCTTGCCCTCTCAGTTGTTGCAGCAAGTTCACGATAGTTTGCGCTCTAAGCGGTAACTCTTGGAATTCCAGCACACTGCCAATCGTCCGTTCCGCTGGACTGAAAGGAAGTCAAAGGAAATTGAGCGTCATTTTACTTTCTTCCTTCCCTACGGGGCCGCCTACAATAGTTAAAAAAAACCTTAGCTTCATTCTTTTTCGAATAATTATATACAGTGTTTGGGTGGAAAAATGTACCGATGTTTATTCTTTTTGTGAAATTTTTTAAAGGTGTTTTTCACCCTTAACATCTGTACATTATAAACCCA…
RPL13B	S_Mikatae	1.39019	0.015558	TTGAGATTCTTCTTTTGTATATTTAGTTGTCTACTATATTATGAGTTTCCTTAAGATAGTTCAATTATAGTAGGCTATTTTATGTATATCCTTGCCCTCTCCGTTGTTGCAGTAAGGTTCGCCATAGTTTGCGCTCTGAGCGGTAACTCTTGGATTTCCAGTACACAGCCAACGGCCCGTTCTGCCAAACTGTACGGAAATTAAGCGTCATTTTTCTTCCCTCTTCCATTCCAAATTTCCCTTCTATTCCTTGAAAAAGTCATAACCCTTTTTTCGTTTAAAACTTTTGTTCCCAATGATTGGGTGGAGAAATGTACCGATGTTGTCTGTTTGAGAGCTGTATTTCCGCTAGTAATTTTCAGACTAAAAACATCTGTACATCATAAACCCATAACTCTT…	TTGAGATTCTTCTTTTGTATATTTAGTTGTCTATTATATTATGAGTTTCCTTAAGATAGTTCAATTATAGTAGGCTATTTTATGTATATCCTTGCCCTCTCCGTTGTTGCAGTAAGGTTCGCCTTAGTTTGCGCTCTGAGCGGTAACTCTTGGATTTCCAGTACACAGCCAACGGCCCGTTCTGCCAAACTGAACGGAAATTAAGCGTCATTTTTCTTCCCTCTTCCATTCCAAATTTCCCTTCTATTCCTTGAAAAAGTCATAACCCTTTTTTCGTTTAAAACTTTTGTTCCCAATGATTGGGTGGAGAAATGTACCGATGTTGTCTGTTTGAGAGCTGTATTTCCGCTAGTAATTTTCAGACTAAAAACATCTGTACATCATAAACCCATAACTCTT…
RPL13B	S_Bayanus	1.09216	0.0277818	TTGGGATTATTCTCTTCTATGTATTGATTTTCCTAACTTTAATTGTGTTTTATTTTTGAATATTACTTATTAATACTAGACTCTATTTTATGTATATCCTTCCCCCCTCCGTTGTTGGAACAATGAGCCTAGTTTGCAGTAAGAACCGTAGTAGTTTGCACTCTAAGCGGTAACTCTAGGAAGCCTGGCACCGTCGGTACGCGCGTTCCACCAAATTGAAAGAAAGTAAAGCGCCATTTGCGTTATAGGCGCCAATAGTTTTTGAAAAAAATGAACCGTCTCATTTTCAGGGTGTTTGTCTGCGCTGAATGGGTGGAAAAATGTACCGATGTTAAATGCCGACACCGTCGGCATTTAAAGTCCCTTTCTTTTCAGGCCTATAACATCCGTACACTAAAA…	TTGGGATTATTCTCTTCTATGTATTGATTTTCCTAACTTTAATTGTGTTTTATTTTTGAATATTACTTATTAATACTAGACTCTATTTTATGTATATCCTTCCCCCCTCCGTTGTTGGAACAATGAGCCTAGTTTGCAGTAAGAACCGTAGTAGTTTGCACTCTAAGCGGTAACTCTAGGAAGCCTGGCACCGTCGGTACGCGCGTTCCACCAAATTGAAAGAAAGTAAAGCGCCATTTGCGTTATAGGCGCCAATAGTTTTTGAAAAAAATGAACCGTCTCATTTTCAGGGTGTTTGTCTGCGCTGAATGGGTGGAAAAATGTACCGATGTTAAATGCCGACACCGTCGGCATTTAAAGTCCCTTTCTTTTCAGGCCTATAACATCCGTACACTAAAA…
RPL14	S_Kluyveri	0.628436	0.0193422	AGTTGTTGTTGAAAGGGCTACATTTTACTTGAAGCCATAAAAGCTCTAATTTTCACGTACATGATGATCTTCGGTTGGGATGTTATATCAGCCAAAGGGTAACTTTACTTGGAAGATATCACGTTAGAAAAGCTCAAGACAAGATATTTATGTAACTGCGTTGGTAAAACTAAAACTGGGACAAGTGAAAATATCAGAGTAGATCTTGGTGTAATATTAGTGTTTGAATTTTCATGGGAAAATCAATTTAGGCGAACTTTTTTCATCACAAAAATCACCAAAGATCCCGTAGTTGTTTTAATAACGCATAAATCAGGTATGAAAAGCCTCTATCAACAATGGATGAACTCACCTGAGTTCTCCTTGCCCTCCTCAGTCATTCTCATTAGAACGAAATCC…	-
RPL14	K_Lactis	1.32534	0.0110303	TATATATAAGTATGATCACAATTGGAACATGACTAGGTGCAGAAGTACACGATAATTATCTCCTCACCTCTGCTGAGGTGAAAGAAAGAGAAGAATTAGTTATAATGAATGTGTTGTAATGAAAGGATTCTTTTCTATAATAGTCAGACCGAAAGTTATTCGCATACCACAAGACTCCCATAATGGAACTAGGCATGTCCCGAGATGACTTGCCCTCGATCGCAAATTATAAAACATCATTCAAAAGAAAAGAAGCGAACCCCAAAACCACGAAACATTATGATAAGAATTCTTCTCAAATCCATACTTCCTGCTGCTAAATCTCAATCATCACTAAAACTAGGTATAGTAATAGCAGTGGCTACTGCTCATGCTGTTACTATTATTATTAAAGTGACG…	-
RPL14	D_Hansenii	0.0898367	0.00483219	AAACGAATCTTCCTTGTCCTATGTATCGACACCTTCATGCCCACCGCTGGGCGGTAGCATCAACATATTTTTGCGCTTGTGGATTTGGATGATCACGTGCATACGTCGGAAGAAAAACCTTCGTCTTAACTACTACCAGTACGCTGGCACTACAATGTCTACAGATGATATGAATGGGAGTATGTGTATTAACTAGTCTAAGCGTGGCCGTTCAACGACTTTGGGTTGGCGTGTTGGGCGTCTCATACTCTATTTCTGTTAGTAACGGTTCCGATGGCCGGTGTATTCATCTCAGCATCAACTAGTTTCAGTAGTAAGTTGGTCGCATGTCGTAGCAAACCCATATGAAACTAGGCATGTTTCAGGTTGTACTACTCTCGAACGCAAATTATTAGTCAT…	-
RPL14	Y_Lipolytica	0.0235877	0.00598762	GTGATGGGGGTGTTTGCAACAGTTGTATTTATAGTCAGGTAATTAATGAATGGTAATATAATGCGGGAGTAGACGTGGGTAGCGCCACCAGTATGAACATTATAAAGGGATACACATAAATATGGGAGATGTTTCGGGGATGAAATGTATCTTGCTCCAGTACATTGTACGATTACGCATTCGTTCTGTCTGCTATGTGTGTGTGCTTATTATCATGTCTGTTCGTGCTATATAGAGGAGACGACTACTTGCAGTAGGTCTGCTTCAGGTATCTGGGTTAGAATATGTTTAGAAAACGCCTTAGGCATTATAGTAACATCAGCGATCTTGGTGATAAAAGATTGTCTTCAGGTGTACAGAAAAGTAGCAGATAGTTATCATCAGAGGAGAGGATTGCTG…	-
RPL14	S_Pombe	0.136166	0.00318414	CTTTTCAACGATTTCGCCACTCGACTTTTGGGAATGTGGTGTTTGGCACTCGACAAAATGTCATTTATCCATCCGTATTTTGCACCCAATCTCACTACCCTCGAGTTTGTTGCGACCACTCCCCAAAAAAGCAGTCACATTGCCTACCTAGTGGAAACATAGATGAACGACGACTTGCTCTTCCCCTAACAAGTCACCACCAGAAAATCAAAA	-
RPL14A	S_Cerevisiae	1.59984	0.027531	TCTGCATGTAGCAATGCGCGGCTTCTTGCAATAACAAGAAAACTAGAGTAGCTAATTTACTGCATGAACCGTACATTCAGCAACAAGAAACATAAGATACTTACCGCACAATATTCATTGGTCAGTTACCGTACACACGAAGATCCTTTCTGAGTAGCGTAGTTTAAGGGAGCACACATTTTTAAATTCTAAACATTGCCTCAAGATGTTCTCCCATATACAAGGAAGGAATATTGAGCAACATGGTTAATCTGCCAGTTGCAACAACGCAAGTGTTATTAGAAATATTGTTCAAGGAAAATATCAGATAAAAAATTTTTCGCACTTCGCTAATCACCCATATAGAACATGGCGGTGTTCCAAGTGATTAGCCCTAGATCGCAAATTATATCATCATTC…	TCTGCATGTAGCAATGCGCGGCTTCTTGCAATAACAAGAAAACTAGAGTAGCTAATTTACTGCATGAACCGTACATTCAGCAACAAGAAACATAAGATACTTACCGCACAATATTCATTGGTCAGTTACCGTACACACGAAGATCCTTTCTGAGTAGCGTAGTTTAAGGGAGCACACATTTTTAAATTCTAAACATTGCCTCAAGATGTTCTCCCATATACAAGGAAGGAATATTGAGCAACATGGTTAATCTGCCAGTTGCAACAACGCAAGTGTTATTAGAAATATTGTTCAAGGAAAATATCAGATAAAAAATTTTTCGCACTTCGCTAATCACCCATATAGAACATGGCGGTGTTCCAAGTGATTAGCCCTAGATCGCAAATTATATCATCATTC…
RPL14A	S_Paradoxus	1.56604	0.0279161	TCTCCATACAGCACTACGCGGCTTCTTGCAATAATAAGAACACCAGGATAGCTGATGTAGCACTTGCCTGCAGCATCCACAACAAGAAACGTGCGATATTTGTCGATCAGCCACCGCAGATACAAGAAATCTTGCTCGGCAGCGTAGTTATAAGATAGCGTATAGTTGAAATGGTTATACATTACCTCAAGATGTTCTTCCCAGATGCAGGTTAGGAATATCGCGCAATATGGTTAATGTACCAGTTACAACGACGTAGGTACTATTGAAAATGGTACTCAAGAAAAATGTCAGATAAAAAACTTTTCGCACTTCGCTAAACACCCATATAGAACATGGCGGTGTTCCAAGTGATTAGCCCTAGATCGCAAATTATATCATCATTCAATTACCTTTCTT…	TCTCCATACAGCACTACGCGGCTTCTTGCAATAATAAGAACACCAGGATAGCTGATGTAGCACTTGCCTGCAGCATCCACAACAAGAAACGTGCGATATTTGTCGATCAGCCACCGCAGATACAAGAAATCTTGCTCGGCAGCGTAGTTATAAGATAGCGTATAGTTGAAATGGTTATACATTACCTCAAGATGTTCTTCCCAGATGCAGGTTAGGAATATCGCGCAATATGGTTAATGTACCAGTTACAACGACGTAGGTACTATTGAAAATGGTACTCAAGAAAAATGTCAGATAAAAAACTTTTCGCACTTCGCTAAACACCCATATAGAACATGGCGGTGTTCCAAGTGATTAGCCCTAGATCGCAAATTATATCATCATTCAATTACCTTTCTT…
RPL14A	S_Mikatae	1.60755	0.00744758	TCTCCATACAGCACTGCGCGGCTTCTTGGAATGACAAAAGCGCCAAGTAATGTAGCACCATGTGTGTATGCCTTTCCTTCATAGTAAGAAATGTACTACACTTACCAATCAGCCATAGCACACACAAGGAATACTTGCTTGGTGACGTAACACTGAAAAAAAATAATCTTACTTATTTAAAAGATAACATAACTGTCTCCCAAGATGTCCTTCTTATACTCATGCCAGTGATATGACGCAACAGTGCCAAGGTACTAGTTACAATAACGCAAGTGTTACTAAAAATACTGCTCAAGAAAAACGTCAGATAAAAAACTTTTCGCACTCCGCTAAACACCCATATAGAACATGGCGGTGTTCCAAGTGATTAGCCCTAGATCGCAAATTATATCATCATTC…	TCTCCATACAGCACTGCGCGGCTTCTTGGAATGACAAAAGCGCCAAGTAATGTAGCACCATGTGTGTATGCCTTTCCTTCATAGTAAGAAATGTACTACACTTACCAATCAGCCATAGCACACACAAGGAATACTTGCTTGGTGACGTAACACTGAAAAAAAATAATCTTACTTATTTAAAAGATAACATAACTGTCTCCCAAGATGTCCTTCTTATACTCATGCCAGTGATATGACGCAACAGTGCCAAGGTACTAGTTACAATAACGCAAGTGTTACTAAAAATACTGCTCAAGAAAAACGTCAGATAAAAAACTTTTCGCACTCCGCTAAACACCCATATAGAACATGGCGGTGTTCCAAATGATTAGCCCTAGATCGCAAATTATATCATCATTC…
RPL14A	S_Bayanus	1.6029	0.0236818	TCTCCATATAACAATATGCGGCTTCTTTAGAATAACAACAACATAAGGGGAGCAAAACTAACACGTCTTCGCAAAAACGAAAGCTGTGCAAGTGCAACCTTTCTGGTCATACCCAAGCGCACAAGAAAACACTGGCTTGGTTTTAGGATGGTAAAGTTGAAACCTGTATTTCAGTAAACTGTCCAAGTATTTGCGCTACGATGTTGTAATACACTAGTCCAGAAGCAAAGAACATGGCCAATGTAGAAGGCGAAATAGTACCAGCGCCACTTAAGATGTTATTTAAGTTTAAGTAATGTCAGATAAAAAAATTTTCGCATTTCGCTAAACACTCATAAAGAACATGGCGGTGTTCCAAGTGATTAGCCCTAGATCGCAAATTATATCATCATTTAATTA…	TCTCCATATAACAATATGCGGCTTCTTTAGAATAACAACAACATAAGGGGAGCAAAACTAACACGTCTTCGCAAAAACGAAAGCTGTGCAAGTGCAACCTTTCTGGTCATACCCAAGCGCACAAGAAAACACTGGCTTGGTTTTAGGATGGTAAAGTTGAAACCTGTATTTCAGTAAACTGTCCAAGTATTTGCGCTACGATGTTGTAATACACTAGTCCAGAAGCAAAGAACATGGCCAATGTAGAAGGCGAAATAGTACCAGCGCCACTTAAGATGTTATTTAAGTTTAAGTAATGTCAGATAAAAAAATTTTCGCATTTCGCTAAACACTCATAAAGAACATGGCGGTGTTCCAAGTGATTAGCCCTAGATCGCAAATTATATCATCATTTAATTA…
RPL14B	S_Cerevisiae	1.36514	0.015132	CCCTTCAACTTATATAGCACCTTTACATATCTTTAATTTTTACGAAGAGCATTTTATTCAACTTTTGTACCTTTAAAGACGGTTTTCAGCCCACACATTTTTTGTTATTTTACACCACACAGTAAAACTTTCTTGCTTTTTTTTCTTGAGACTCCCCGACCATTGTTCGATATTCCAATTTTCGCAATCTTCAGAAAAGGGTATCCTAACATTCTAAATTAATAATAAAGAAGAGAGGCTACAAGCATTTATTAGTGTGAAGCATTTAAAGTAACTTCAGGAAATAAACGCGCAAATAAACCAAAA	CCCTTCAACTTATATAGCACCTTTACATATCTTTAATTTTTACGAAGAGCATTTTATTCAACTTTTGTACCTTTAAAGACGGTTTTCAGCCCACACATTTTTTGTTATTTTACACCACACAGTAAAACTTTCTTGCTTTTTTTTCTTGAGACTCCCCGACCATTGTTCGATATTCCAATTTTCGCAATCTTCAGAAAAGGGTATCCTAACATTCTAAATTAATAATAAAGAAGAGAGGCTACAAGCATTTATTAGTGTGAAGCATTTAAAGTAACTTCAGGAAATAAACGCGCAAATAAACCAAAA
RPL14B	S_Paradoxus	1.43478	0.025388	TTCTCTAAATCTACATAGCACCTTAAGATACTTTTAATTTTATAAGGCGTCTTACTCAACTTTCATATCTTGCCGCTAAGGTCTTTGGGGACGCCTCTCCGCCCATACATTTTAATATATTTACACCACACTGCAAAAGATATCTTGGCTTTTTTCTTCAAACTCGCCGGCCATTCTCCGACATTTCAAATTTCACAATCTTCAGAAAAGGGTATCCTAACATCCTAAATTAATGATGAAGAAAAGAGGCTATAAGCATTTGTTAGTGTGAAGCATTTAGAGCATCTTAAGGAAATAAACGCGCAAATAAACCAAAA	-
RPL14B	S_Mikatae	1.26565	0.0225286	CTTCTAAATTGTATAGCGCCTTACGTACCGTCAATTTATAGGACTTTACTTAATGTTCTGATCCGGTCGTTAATGCCTTTTGAAAAAGACCTTTTCCGCCCATACATTTTATTAAATTTACACCACACTATAAATAAATATTGGCCATTTAATTCAATTTTCGCCGACCATTCATCTATATTTCAACTTTTGACATTTTTCAAAAAAAAGGTATCCAAACATCCTAAATTACTGTTGAAAAGAGCTATAAACATTTACAAGCGTAAAGCGATTGAACCAAACCTAAGAAAGAAACGCCTAAATCATCCAAAA	-
RPL14B	S_Bayanus	1.59631	0.0397771	TTCCTTAATTTTGTACCGCCTTACGTATCACAATATATACCTGAGCAGGTTCGCTTAATTTCTCTGATTCAACCTCAACTAATTTTGAGGACTTTATTGCGCCCATACCTTTTTTCTGTTCTACACCGCAGCATGAAATCATTTTGTAATTTTTTCTCGGGATTCCTTCAAGCATTCGCCGAGCGTTCCTTGAAATTTCAGTTTTCGTATTCTTCGCTAAAGGGTTTCGATACTATCTTAAGTCAATAGTGTAGAAAAGAGGTAATAGGCATCTATTAGTATATGCTCTCTTGAAAAACCTTTAAAAAAGAAACGCACAAATCACTCAAAA	-
RPL15	S_Kluyveri	3.32076	0.101698	ATGTTGTCGTTCACGTTTGAACACACCTTCCTATTAAAGTAAAGAACTGAGGGGCTGTTACTACGGGATTTCGTGAAACCAGTGCTCCTGAGGGTTTCCCTGCAAACGAGGTAAAGGAAGTTGGTATGGACAACTGTACTTTGCAGCTATCCCATATCATGTACTCTAGGCCCTGAATTGAGTTTGTAACCGCTACGCGAAGCAAGAAAACCGCAAACTCACTTACCCTCCTCGCCTTAATACCGAGGTCTCTGGAATTCGTTTTATAAATCCTTGTTCTTCTTCCCACGGTTTCGTAGCACATTCTACAATCTCGTCGCTTCGAATGCACGTGCACATATACCGTTGGACGAACACCTTCGTCAGAAAAAACATTTATAGTTTTCAAATGTCTCGCGG…	-
RPL15	K_Lactis	1.61816	0.0747266	TTGATCCAAAAAAGAAGCAACAAGTGCAGGGGTAGTGATGTAAAGACAGTAAAGATAATTGAGATAGTGAGCCAGAACGTTTGAGATCATAACCTTTTCGTCTCGAATCACTCCCAAGTAATTCAAGTTAGCTGAAGAAAAAACACATAAGGTGGCTTGCATACTTACGAAATATGTAGAATATACCCAACAATCTAATGTTGTTCTTGATCCAACGATCACTTTCTCGGCCGGAGACCAATTTGAGCAGCCAGCTGCTCTTCGCCGGAAAAAAGAGCTCTAAAAAGAAAAACCGTTATTTAACAAAGAGATCGACCAATTTTCTGTGAGACGACATAATTATGCCTTGTAAAAGAAATACTAAGGAGGAACCAGTATCTGCAAGAAGTCATACGCGAA…	-
RPL15A	S_Cerevisiae	2.39889	0.021736	AGGCCACACACAGACACAAGCTGAAACGAAAATATCTATAAATATACACTTCTTAATTTGTATTCAAGATATTCTTATCAAAGCACTTATTTTTTCATTATATTTCTATATTGATTTAAGGACGGTACGCTATTTTCTTTGTACCTTTTACTATGCATAAAAAAAGGGGAAGTGTTTAACAATCGACACTTACTTAATATGTTTTGCCGCCCTTCATAAGAGGGTGTTTCTAAAATTTATTGGGCAAGAATGAGATGGACTCGCACCCTACATGACGTTTAAATATTTAGTGTTAAGGTTCAGAACATGCACCAGGTGCGACATGTGTTGCGATTATCATGACAATGTCTCTATCCGAGATGCATTTGTAGTATCAATTGATGCGTATTATGACATGAT…	AGGCCACACACAGACACAAGCTGAAACGAAAATATCTATAAATATACACTTCTTAATTTGTATTCAAGATATTCTTATCAAAGCACTTATTTTTTCATTATATTTCTATATTGATTTAAGGACGGTACGCTATTTTCTTTGTACCTTTTACTATGCATAAAAAAAGGGGAAGTGTTTAACAATCGACACTTACTTAATATGTTTTGCCGCCCTTCATAAGAGGGTGTTTCTAAAATTTATTGGGCAAGAATGAGATGGACTCGCACCCTACATGACGTTTAAATATTTAGTGTTAAGGTTCAGAACATGCACCAGGTGCGACATGTGTTGCGATTATCATGACAATGTCTCTATCCGAGATGCATTTGTAGTATCAATTGATGCGTATTATGACATGAT…
RPL15A	S_Paradoxus	2.03473	0.0777316	AGACCACACGCAGGCACAGGCACGCACGCTAAAGCGAGGAAACTATAAATATACACTTCTTAATTTGTACTCAAGATGTTCTTATTAAAGCAAATAATTTCGCCATCATATTCTATGTTTGTTCAAGGACGGTACGCTATTTTCTTTGTACCTTTTTACTATGCATAAAAAAAGGGGAAGTGTCTAATAATGAACAGTTACTTAATACGCTTTGCCGCCCTGAATAGAAGATGATTCCAGGAAATAATGGACAAGAACGAGGTAGTTTTATACCGTATGTGACCGTCAGATATCTAGCAGTAAGTTCAAACCATCCTCCAGGTGCGACATGTGTTACGATTATCATGACATTGTCTCTTATCCACAAGGCTTCTGCAGTTTCGAATGATGCATAATACA…	-
RPL15A	S_Mikatae	2.39978	0.0448803	AGATCACAAACACACGCACAAAACTATGGACACCTATGAATATACTTCTTGATTTATATAAAACTGTTTTCATCAACAAAATAGAATCATCATTATAATTTTATACGCTTGAGGATGGTACGCTGTTTTCTTTGTACCTTTCCATTTTGCATGAAAAAGGGGAAGGCTTTATATAAAGAAGAATTACATAACTCACTTTGCCGCCCTGCACAGTAGACTGATTATGGACAATATTGAACAGGAACAAAATAGTAAATAACGCCTATGTGATGGATACCTAGCAGTAAACTCAAAATAAGCCTTAGAGCACCATGTATTAAAGTTATCCTGTCATTGCCTCTTATCTGAAGGACTTTTGCAAACTCAACTGATGCATTTTGCAACATTATTATTAAAGGG…	-
RPL15A	S_Bayanus	2.00106	0.0254507	TCTTGCGTCACATATAAATCACGTACACACACACACACACACACACACACACACACACACACACACACAGACAATCACTACATAAATATATACATCGAAGAATTTTTTTATAATATGTATTTTGAGGCTCGGATAAATACGGTGCATAATTTCCCTTGTACCTTTTCAGAGTGCATAAAAAAGGGGAAGGGTCTTTTTTTCAGTGATTTGGTAATAAATAATACAGATAGCTTTTGCCGCCCACCTTTAGCAAGCTGATTTTGTTGCCATTGACCAAGAACAAAGCAACGCTTGTCCTATATGCGCCTTGAATCATAGGGAACATAACATCAAGGCTTTTAAAAGCTGCTCCACGTGGCCAGTTACCATTAAGTTTTCTCCCAATGGCATACTGCAGGG…	-
RPL15B	S_Cerevisiae	0.214231	0.00501357	TTTATTCAGGTTATTTGCGATTAGGTTGGGGTTTGTGTTTGATGGAGACCTCAGTAATTAACAGTACATTCTGAGAGCGGCAAACAGAATTCTGCCTTAAATTCAGATCGTTTATATACTTTTTTTTCACTTTTTACGCTCGAGACACCATAACCCAAAAATAGATCAAACTAGCCATTGTATTTTTCACCAATATGGCAATGTGATTTCCGCATTAGGCAATACTGTGAAAGACTCTATGCTACGTCAGTTCGGAGGCGTGTTTCGCAATCTTCGCGTTCCAGAACGCACCAACGCGTTGTTATTTGCGCAGCACAAGGGGGACGAGAGACATTCTGGCCAACGTGCATTCGACGGAAGTAAATTTCGGCTGGAGGCTAAGCGCTGCTTTACTGCAAT…	TTTATTCAGGTTATTTGCGATTAGGTTGGGGTTTGTGTTTGATGGAGACCTCAGTAATTAACAGTACATTCTGAGAGCGGCAAACAGAATTCTGCCTTAAATTCAGATCGTTTATATACTTTTTTTTCACTTTTTACGCTCGAGACACCATAACCCAAAAATAGATCAAACTAGCCATTGTATTTTTCACCAATATGGCAATGTGATTTCCGCATTAGGCAATACTGTGAAAGACTCTATGCTACGTCAGTTCGGAGGCGTGTTTCGCAATCTTCGCGTTCCAGAACGCACCAACGCGTTGTTATTTGCGCAGCACAAGGGGGACGAGAGACATTCTGGCCAACGTGCATTCGACGGAAGTAAATTTCGGCTGGAGGCTAAGCGCTGCTTTACTGCAAT…
RPL15B	S_Paradoxus	0.622276	0.011758	TTTATCGAGGAGATCTGTGGTTGGTTTGCGTTTGTTTTTCGATGCAGACTTCAGTAAAGGATATCACACTCGAAAAGCTATAAAACAGAATTATGTCTCAGATTCAGATTGTTTATATACTTTTTTTTCACTTTTTACGCTCGAGACACCATAACCCAAAAATAGATCAAACTAGCCATTGTATTTTTTACTAATATGGCAATGTGGTTTCCGCATTGGGCAATACTGGAAGAAAATATATGCTACGTCAGTTCGGGGGCGTGTTTCGCAATCTTCGCGTTCTAGAACGCACCAACGCGTTGTTATCTGCGCAGCACAAGGGGGATGAGAGACATTCTGGCCAACGTGCATTCAACGGAAGTAAATTTCGGTAATGGAGGCTAAGTGCCGCTTTACTGC…	TTTATCGAGGAGATCTGTGGTTGGTTTGCGTTTGTTTTTCGATGCAGACTTCAGTAAAGGATATCACACTCGATAAGCTATAAAACAGAATTATGTCTCAGATTCAGATTGTTTATATACTTTTTTTTCACTTTTTACGCTCGAGACACCATAACCCAAAAATAGATCAAACTAGCCATTGTATTTTTTACTAATATGGCAATGTGGTTTCCGCATTGGGCAATACTGGAAGAAAATATATGCTACGTCAGTTCGGGGGCGTGTTTCGCAATCTTCGCGTTCTAGAACGCACCAACGCGTTGTTATCTGCGCAGCACAAGGGGGATGAGAGACATTCTGGCCAACGTGCATTCAACGGAAGTAAATTTCGGTAATGGAGGCTAAGTGCCGCTTTACTGC…
RPL15B	S_Mikatae	0.0691084	0.00608391	TATATTGAGTGAATTTGTATTTGGTTTGTTTTTTTGGTTAATTATATCACGAAGATAACTCCTGTAAGCTGTAAAGTAGAAACCTAGTTCGAATTCTCATTGTTTATATACTTTTTTCCACTTTTCACTCTCGAAACATCTAAAGCCAAAAATAGATCAAACTAGCCATTGTATTTTTCACCAATATGGTAATGTCGTTTCTGCATTAGGCAATAGTGCAAAAAAGTATGCTCTACGTCAGCTTCGAGGCGTGTTTCGCAATCTTCGCGTTCTAGAACGCGAAGCTCAAGGGGGAGGAGGGAGACATTCTGGCCAACATACTTTTGACGGAGGTTAAATTCGCAACAAATAGCTTCATCAGAGTGGCTTGCAGAAATGTGCTATCGATACTGGTTTGTG…	TATATTGAGTGAATTTGTATTTGGTTTGTTTTTTTGGTTAATTATATCACGAAGATAATTTCCTGTAAGCTGTAAAGTAGAAACCTAGTTCGAATTCTCATTGTTTATATACTTTTTTCCACTTTTCACTCTCGAAACATCTAAAGCCAAAAATAGATCAAACTAGCCATTGTATTTTTCACCAATATGGTAATGTCGTTTCTGCATTAGGCAATAGTGCAAAAAAGTATGCTCTACGTCAGCTTCGAGGCGTGTTTCGCAATCTTCGCGTTCTAGAACGCGAAGCTCAAGGGGGAGGAGGGAGACATTCTGGCCAACATACTTTTGACGGAGGTTAAATTCGCAACAAATAGCTTCATCAGAGTGGCTTGCAGAAATGTGCTATCTATACTGGTTTGT…
RPL15B	S_Bayanus	0.718282	0.0321191	TTGATTGTATGTATGTGTGGTGGTTTTTTTATTTGATGATTATTTCTGAGACACGAGAAAGGAACTACACAACTCAGGGCCAACAATGCCGTTTTCGTAACTGTATTCTGATACTTTATATACTTTTTTTCACTGTTCCATGCTCGAGACTCCATGAGCCAAAAATAGAATAGACCCGCCATGATGTTTTTTACCAATTTGGCAGTATGGTTTCCGAATCGGGCAATACAGCAAGAAACCAGTACTACGTCAACTCGGGCGGGAGGGGGCGTGTTTCGCAATCTTCGCGTTCCGGAACGCAGCGACGCGTTGCCTCCATGCAGCCCAGGGAGGGGGCGTTCTGGCCACCACAGTCGAGGCTAAGTCCCGCCCAGCCCGGTGGCTGCTGCAGCAGGAGCT…	TTGATTGTATGTATGTGTGGTGGTTTTTTTATTTGATGATTATTTCTGAGACACGAGAAAGGAACTACACAACTCAGGGCCAACAATGCCGTTTTCGTAACTGTATTCTGATACTTTATATACTTTTTTTCACTGTTCCATGCTCGAGACTCCATGAGCCAAAAATAGAATAGACCCGCCATGATGTTTTTTACCAATTTGGCAGTATGGTTTCCGAATCGGGCAATACAGCAAGAAACCAGTACTACGTCAACTCGGGCGGGAGGGGGCGTGTTTCGCAATCTTCGCGTTCCGGAACGCAGCGACGCGTTGCCTCCATGCAGCCCAGGGAGGGGGCGTTCTGGCCACCACAGTCGAGGCTAAGTCCCGCCCAGCCCGGTGGCTGCTGCAGCAGGAGCT…
RPL16	S_Kluyveri	1.10827	0.00968006	GGCAGTAAGAATAGGGCATATGCTTACAATCTATGACTTTTACATCCATACATTATATAAATTTCTCTTATAAGTAACCCATACACCGAGATTATTTTCAGTGAACCTCCATAGGTTTTTTGTCGCGTGGATGTTTCTACGCGAACGACACATTCTGGGCGTGCGACCACTGCTGACTCGTTTTACACGGAGAGGGCCGTTGGCGTCGTATGCTTCCCAACCTGCGTAGGCTGAGCCCAGCACTCCTGCCGAATCAGCCTAGCTTGCTCAGGCTTCTCTCCCCTGGAGCCACACGGTCCTGCCCAGAACCCTCCAGCTACGCTGTGGAACCCCTCCAGCTTACACTCCAACCTCGATGCCTGTAGTCTCACCGGTTACTCCCGCTCGAGTCCTCTGATG…	-
RPL16	K_Lactis	1.46668	0.0241587	ACAGAAGAATGGCGCAGTATATACGACATATTCACAGTATGATAGGGTAAGATTATTCTGTGTAGAACTTCTGGAAACGCTTTATGATTACCCGGATTGAAAGTATCTGTTTCCTCCTTGGACTGTTTTCCTGAACACCCGAACACCCGACAAGTTTATCAAATTCACGGAAAACTATATTATTTGTATGATTACCGGATATTGCAAAATTGTTTTTTCGAGAATTACAGTGAAGTCAACAACCACCAGAAGGAGTACTGTGCGCGATTAGGCCGCCTGCGCAAATCGTTTCTTCCCATGATCGCCTTCCCGCCAATCACCCCAGCCTAGCTTCTGACTGCCTTGGCCAGCCTACTGAGAATCCCAAACTCTCTTTCCGCTTTGGACGTTACTCGGCTG…	-
RPL16A	S_Cerevisiae	1.46088	0.0199154	AGCATCGGTACACCATGTAACACCAGTACATTTATTCATGAAACATTAAATTTTTCTGCGTCGGGCCGAGAGATTATTTTCATGATACTTCGGCCTAGCTATGCTCCTACGCCCGCCAATGCAGAACAAATCCTGCCCGGGAAAACTACCCCGATGCTAGACTTCTCCCTCTGTATCCATGCCCGGCAACAGAGACCCTTGGCTAAGCCCGATGCGCAATAGTACCTGTAGTGCACTCCCCGAGCTTATGCCTGAGAATATGCTATTGCAATGGGTCAATGTAGGTACTGCAGGGAAATTCAATCTTGGGCTGCTGTGTAATAATAATTAAATTAGCAATTTAGTAATCACACTGTATAATTGCACGCTATCGTTATACATATTATTTCTCTTTGAAAA…	-
RPL16A	S_Paradoxus	1.60686	0.0154997	AGCATCGGTACACCCTAATACACCTGTACATTATTTATGGAATATTGAATTTTTTCCGCGTCGGGCCGAGAGAATTAGTTTACTATACTTCGGCTTGGGTCTGGGCAGCTACATCGATTCAGGAAGAAATTGTTCTGCCTGGGCAAACTACCTTCATGATACACTTCCCCTCCGGCGTCCATGCCCGGCAGCAGAGAGCCCTTCGCCAAACCCGATGGGTAATTGTGCCAGTAGTAAAACTCTCCAAGCTTATGCCTGAGAATCTGCTATTGCAATGGGTCAATGTAGGTTGTGCAGGACAGTTCAATCTTGGGCTGCTGTGTAATAATTATATTAGCCATTTAGTAACTACACAATATTATTTGCACTATATCTTTATACGTTTTATTTTTCTTGTTG…	-
RPL16A	S_Mikatae	1.34933	0.0243983	TTTTATAAGATGACCTCACCAAGCATCTGTACACCTACTAGCACCTGTACATTTTATTTGAAATATATGAATTATTTTCCGCGTCGCGCCGTGTACGATGGTTTATTGTAATATGGCCTGAGGTTAGGCCATTAGATCGTTCTAGGAAAAATATGTTCTGCCTGGACCGACTACCTTTACGCGAAACTTCTGCTCCTGTATTCATACTGGACTGCTAGTGGGCCTCTCTCCCGGCCTTCTAGCCAATTGTATGTAGTAGTGAAACCCTCTCTAAGCACAAGCCTGAGAATCTGCTATTGCAATGGGTCAACGTAGGTTGTGCAGGGACGGGCAATCTTGGGCTGCTACGTAGTAGTAATTATATTCATCATTTACTAAGTATAATATATTGATTGCAGT…	-
RPL16A	S_Bayanus	1.6119	0.0190489	AAGCAACTTAAATGACTGCTTTATGAAATTGAAACATCGGTACACCCGAAGAACCTGTACATATTCAAGAGCTCTTGAATTGTATTTCGCGTCCTATCGGAAGCGTTGGCCCGCTGTGCTCGGCCGGGGGTTAGGCGCATTCAATAATCCAGACAGAGCAAATCCTGTCTGGGCGAATAATTCCCGGGCTGGGTTTCTGTTCGCAGACCCGAGCTGGGAACGGCGAGAGTCTACTCCAGGCTCATTGCGCAACTGTAGTGGTAGGGAAATCTCCAAGCATGTGCTTGGAAATTTACTATTGCAATGGGCCAACGTAGATTGTACAGGAATAGGTCAATTTTGGGCTATCATGTAATAATTATATTAGCCATTTACTACGTACATCATATTAATTGCATT…	-
RPL16B	S_Cerevisiae	1.52043	0.0345374	ACAAGAAACAAGGTGAATCACTAAGACTAAAGAAATGAATGAGAAATGGCTAAGCTGCAGCCAGTCATATGAGCTGCTTTCCTTTCATTCTATTGTCGTCCGAATCTATGTCACGAAGTACATATATAACTGTCTTTCATATATAATATTTAATCACCGTGCATTCCCTATTTTACTCTTCCTCATGCGTTTGATCATCTGACCTTTATGATTTTGAACACCCCGCAATGTTCACTCTAATTTATGCAACTGAACTTTATTTTCGCTGCTGTGTTTGCATCCTTGACATATTCAATCCGTACACTATACACACCCAAACCTCCTTTAAAAATTTCCTATGAATCAGAAAATTTGGCTGTTTCTCAACGCTTCGGCCAACGGGTGAAAAACAGCGGCAGA…	ACAAGAAACAAGGTGAATCACTAAGACTAAAGAAATGAATGAGAAATGGCTAAGCTGCAGCCAGTCATATGAGCTGCTTTCCTTTCATTCTATTGTCGTCCGAATCTATGTCACGAAGTACATATATAACTGTCTTTCATATATAATATTTAATCACCGTGCATTCCCTATTTTACTCTTCCTCATGCGTTTGATCATCTGACCTTTATGATTTTGAACACCCCGCAATGTTCACTCTAATTTATGCAACTGAACTTTATTTTCGCTGCTGTGTTTGCATCCTTGACATATTCAATCCGTACACTATACACACCCAAACCTCCTTTAAAAATTTCCTATGAATCAGAAAATTTGGCTGTTTCTCAACGCTTCGGCCAACGGGTGAAAAACAGCGGCAGA…
RPL16B	S_Paradoxus	1.5258	0.00568981	ATAAAAAACAAGGTGAATCACTAAGACCAAAGAAATGAACTGGAAATGGCAAACTCTGACCGTAAAAGCAGCTTTTTCTACCATTCTAATGTTATCCAAACCGATATCACGAGATACATATATAACTGTTTTTCATATACAATATTTAATCACCGTGCATTCCATTTTTTACTTTACCTCTTTGTTTGGTCATCAGACATTTACAATTTCAATCACCTGCATTTCTTCACATTTTTACTCTCTATTTTAGGCAGCTGAACTTCATTTTCATTGAAAGTTTCCTATTCCTGACATTATTAAATCCGTACATTCCTTAAACCCAAACCTCATCTTCAAAAATTTACACCTGGCTAGAAAAGTGGGGCCTTTCTTGACGGTTGGGGAGCGCGTGAAAGACCG…	ATAAAAAACAAGGTGAATCACTAAGACCAAAGAAATGAACTGGAAATGGCAAACTCTGACCGTAAAAGCAGCTTTTTCTACCATTCTAATGTTATCCAAACCGATATCACGAGATACATATATAACTGTTTTTCATATACAATATTTAATCACCGTGCATTCCATTTTTTACTTTACCTCTTTGTTTGGTCATCAGACATTTACAATTTCAATCACCTGCATTTCTTCACATTTTTACTCTCTATTTTAGGCAGCTGAACTTCATTTTCATTGAAAGTTTCCTATTCCTGACATTATTAAATCCGTACATTCCTTAAACCCAAACCTCATCTTCAAAAATTTACACCTGGCTAGAAAAGTGGGGCCTTTCTTGACGGTTGGGGAGCGCGTGAAAGACCG…
RPL16B	S_Mikatae	1.55927	0.0194273	ACAATTAAATTAAGAAACGAGTCCAAAACTGAATAAGTAAATGAAGGATGACTAAGGAAGGTATGACCAGAAAAGCAACTTTTGCACAATTCCATTGTTAATCAAAGTAAAATCACGAGGCACGTATATAAATGCTTTCATATACTGTATTTATTCACTATGCATTCCATTTTTCAATTTTCTCTCTGTTTGGTCATCAAACTTTCATGTACTTTTAAACGCTATTTTCTTCAATTCTCACTTCACATAATATATGCTGTTTTCTATCCTTGTCATTTTTAAATCCGTACATACTACTTAACCCAAACATTTTATATAAGTCTGACCGGCGAGATGATTATTTTATTTCTTAACGCTTTGAGGAGCGGGTGGAAAAACAGCGACAAACCGTTTCCCCCC…	ACAATTAAATTAAGAAACGAGTCCAAAACTGAATAAGTAAATGAAGGATGACTAAGGAAGGTATGACCAGAAAAGCAACTTTTGCACAATTCCATTGTTAATCAAAGTAAAATCACGAGGTACGTATATAAATGCTTTCATATACTGTATTTATTCACTATGCATTCCATTTTTCAATTTTCTCTCTGTTTGGTCATCAAACTTTCGTGTACTTTTAAACGCTATTTTCTTCAATTCTCACTTCACATAATATATGCTGTTTTCTATCCTTGTCATTTTTAAATCCGTACATACTACTTAACCCAAACATTGTATATAAGTCTGACCGGCGAGATGATTATTTTATTTCTTAACGCTTTGAGGAGCGGGTGGAAAAACAGCGACAAATCGTTTCCCCCC…
RPL16B	S_Bayanus	1.27561	0.0121006	GCAAGAAAGTAAGAGAGAGTAACAAAAACGAACAATGGAACGACATGGTTAAAACTCACTTTACTCATCTCTCACCTATAGAGCGCCTTTTCTGCTGCTCTTTTGTTAATTAGATTAAAACTACGAAATACATATCCCGCATTATTTCATATACTATATTTATTCGCATGCATTTTTTTCCCCACTTTTCTTTTCATGTTTAATTATCAAATCGTCATGTGCCTATGAAGATTCCTTACACTCCTCTCTCTGCCCAGTGGATGATGAGACCATAGATTAAATCTTACTATCTCAAACCATTTTTTTGCCGAATCAGATATCAACACCCGTGCATTTATAAGACCCAGACCCCATAAACACTGAAGTACTTTCAATTTTTTGCTTTCAAGAATGAAAAAG…	GCAAGAAAGTAAGAGAGAGTAACAAAAACGAACAATGGAACGACATGGTTAAAACTCACTTTACTCATCTCTCACCTATAGAGCGCCTTTTCTGCTGCTCTTTTGTTAATTAGATTAAAACTACGAAATACATATCCCGCATTATTTCATATACTATATTTATTCGCATGCATTTTTTTCCCCACTTTTCTTTTCATGTTTAATTATCAAATCGTCATGTGCCTATGAAGATTCCTTACACTCCTCTCTCTGCCCAGTGGATGATGAGACCATAGATTAAATCTTACTATCTCAAACCATTTTTTTGCCGAATCAGATATCAACACCCGTGCATTTATAAGACCCAGACCCCATAAACACTGAAGTACTTTCAATTTTTTGCTTTCAAGAATGAAAAAG…
RPL17	S_Kluyveri	0.862726	0.0260217	ACATATGTCTATCAGAAAAAGCTGTGTAACCCACACATGCGCGTATGCGCGTACACGCGGTTTTTAATGTGCTCACGCAATCCTGGTTTTCTGTTTTTTTTCTTCGCTCTTTTTCGTTGCGGGCAGAGATTGCTACCCACGCAACATCGCTCACATGCTCTTGCCTGGCCGATGCCAGCTTGCGCACCCAGTGGGTGGACTCCTCCCGGCTCGCAACCCAGCACAGTCTGCCTGGTGCCCTGTGCCCGGCACGCATGCCCAGTCCCCTCCTGTCCAGTTCACCCCATTCAGCCCAGTGGCAGGCCTCCCCCCCAATGGCCCCGTCTCCTGCCTCCGCTCGCTTCCGCACCGACTCTCTCTGCCAATTTCGTCAATCACACTTTGCGGGCTGCACATATA…	-
RPL17	K_Lactis	1.14464	0.0296269	GTATAGTTTTGCGTAGTTTCCTTTGGAATTATTCAATAAACCCGTTTTCGGTATATATAACTCCCCTGAGACAACAATAAACTCTTATTAGAGCGAAATCTTGAGAAGAGGCGACTTTTCAAAGGGCACTGTATGTACTCAGCACTTAATTATTTGCGTAGTTACCTTGCTTGGATACCTGATGTAGACAACATAGGGCTTCAAAAGTAGTTATGGTTCAAATGGAAATGTAAAGAACTCGTTGTATATTAATGCTAATCCTATCTGATAAATGTCATTAGCTTAGGGGAAATATATGTGGCCGGGTAAATATCCATCTTGTGACTGTTTAAGCCCGTGCATCCTTTTACATGCGATATTTAACACCCATAAATCTCCTTCTTTATTCTCTATAATATA…	-
RPL17A	S_Cerevisiae	1.72614	0.02982	AGAGAGTGTGCGCAATATTTTAGTTCTTAAATATGACATAGATTATCAAAAAACTTTGTATGTTTGCCAGATTTCAGTGAATCTGCAAGAGTATAAATTATAGGAATTTGGGTGAATTAAACCATTTATTATGTTTTATGTATCATGGAAAAAACAGAACCTTTATCAAATCATCTATGAAATTTTGACAGGTTAGCCATTTTCCTCATTTTATTGCTCTGCAATAGTAAATTATATAGATTTATGCAATGCTCTAGGTTCCGGCGGCTTTTCATTTAATGTGAACTCAAGACTATTATCATCCAAACACATTACAACATCCGTACATTTAGTTGGCTCCATTTTTTGAAAAAATACTTCCGAGTAAGATGCTGAAAGTAATCAAATTCCGTGAAAAAG…	AGAGAGTGTGCGCAATATTTTAGTTCTTAAATATGACATAGATTATCAAAAAACTTTGTATGTTTGCCAGATTTCAGTGAATCTGCAAGAGTATAAATTATAGGAATTTGGGTGAATTAAACCATTTATTATGTTTTATGTATCATGGAAAAAACAGAACCTTTATCAAATCATCTATGAAATTTTGACAGGTTAGCCATTTTCCTCATTTTATTGCTCTGCAATAGTAAATTATATAGATTTATGCAATGCTCTAGGTTCCGGCGGCTTTTCATTTAATGTGAACTCAAGACTATTATCATCCAAACACATTACAACATCCGTACATTTAGTTGGCTCCATTTTTTGAAAAAATACTTCCGAGTAAGATGCTGAAAGTAATCAAATTCCGTGAAAAAG…
RPL17A	S_Paradoxus	1.59571	0.035657	AAAGAGTTTAAGTAATATTTTATTTCTTAAATATGACATAGACTATCAAACACTTTGTATATTTGTCAGATTTCAGCAAATCTGCAAAAGTATAAATTATAGGAATTTGGGTGAATTGAACTGTTTACCATTTTTTACATATCATAAAAGGACAAAATCCTCATGAAATTTTTGATAGTATTATAATGGGTTGAATATTTCCCTTTATTATTGCTCTGCAATCATAAATTATATAAATCTATGCGACGCTTTAAGTTTCAGTGGCATTTCATTTTATTGGAACTTCAGACTGTTTATCATCCAGACATTCAGACATCCGTACATGTTTTACTTGGCTCTCTTTAGAAAATACTTTGGAATAAGATTCTGATGGAGCATATTCCGCGAAAAAGAGACCAG…	-
RPL17A	S_Mikatae	1.80141	0.0775211	ACGAGAGCGTAAGTAATATATTATCCCTTTAATATGACATAGATTATCAAAACACTTGGTATATTTGCTGGATACCAGCAGATCTACAAAAGTATAAAATATAAGAATTTGGGTGGGTTAATAATGTGCAACTTTTTTTTGTTATCTACTTAAAATTATATCACAGCAATACAGGATCTTTAAATTAAATTTCAATATCATTATGACAAGCTGGCTTTTTTGCATTTTTCAATCTATAATAGTAACTTCTGTCCTTAAATGCGACATTCTAGTCTTCAGTAGCAATTCACCCTTTCTGGTGAAATGTTAGACTATCAACATCCTAACATCATCACACCCATACATAATATCAATCCCTAGGAAAATGAACATAAAGTAACATGCCGACGGTGAGAAAAA…	-
RPL17A	S_Bayanus	1.91863	0.0328804	CGAGGCTATAAATAGTATTTATCTCTTAAGTATGACAACATATCATCAAAACATTTTGCATGATTGCCAAAAAAATGAGCAAATCTACAAAAGTTAAAATATAAAAATTTGGTTGGGCTGATCATCATTCATTGCTTTTCAAACGTATTACATGGAATTGTAATATCAAGATACAGATTCCCTTGGTATCGCGTTTGAAAATCACTACACCCACTTGGTGAAGCTATTTTCGCATTCTATTGATCCTCAGGTGATAATTAGATATATATCAGATATTCAATACTAGTTTCATTGTGGTTTCCAAAACTCAAAACTTCTGCGGCTGTTTTCTAGTTTTGTGCATCCAGACATTTGCACATCCGTACATTTTTATATGACATTGTTCTAGAAGTATTCTGA…	-
RPL17B	S_Cerevisiae	1.15691	0.0263196	AGCTTTCCTTACCTTTATCTATCGCATCGATTGAAGATCTCAGATATAAATCTACAGCAGACTAATATGCCACTAACCTCTTGAAAACCCGTCGCTTACGAAAAAGAAGGAAGACGGAAAAAGGACGGCATCCTTTTCAATTTGCACCTGGACATTCTCACCCATACATGGCCTTGTTTTTTTTTTAACTGAAACTTTTTTGGCCGTTTTTGAGGATATGATATTTCTATGTCGGAGAACAAAAGTAGGCGTGGGAAGTGAAGATCTTTCGCTCTTTCTGTGATGATCTCCTTCCAGCTAGGCTCGGTTCGACCCTGAGGTCTGCCCCTAGCTCCTTCCTATTCCAAACGGAATACCAAATGTCCAGCCCGTGACAATGCAGCAGGGTGGCTAATTTTT…	AGCTTTCCTTACCTTTATCTATCGCATCGATTGAAGATCTCAGATATAAATCTACAGCAGACTAATATGCCACTAACCTCTTGAAAACCCGTCGCTTACGAAAAAGAAGGAAGACGGAAAAAGGACGGCATCCTTTTCAATTTGCACCTGGACATTCTCACCCATACATGGCCTTGTTTTTTTTTTAACTGAAACTTTTTTGGCCGTTTTTGAGGATATGATATTTCTATGTCGGAGAACAAAAGTAGGCGTGGGAAGTGAAGCTCTTTCGCTCTTTCTGTGATGATCTCCTTCCAGCTAGGCTCGGTTCGACCCTGAGGTCTGCCCCTAGCTCCTTCCTATTCCAAACGGAATACCAAATGTCCAGCCCGTGACAATGCAGCAGGGTGGCTAATTTTT…
RPL17B	S_Paradoxus	1.20018	0.010569	AACTTTCCTTGCCGTTATCTATCGTATCGGTGCACACCTCAGATATGAATCTACAGCACAGCTAATATGCTACTAACCTCTTGAAAACCCGTCCCTTACGAAAAAAGAAGAAGCTATGAAAAGGACTGCACCTTCATTGTTTGCACCTGGACATTCACCCAAACATGTTCTCAGCTTTTTTTTTAACTGAAACTTTTTTGATAGTTTCTGGGTAGATGATCTTTTCATGCCGCGAAATGAAAGTAGGCGTGGCAGCGAGAAGGTCTTTCTCTCTTCCTGTGATATTCTCCTTCTAGCGATGCGCATCCTCTGCCCTGAGGTCTGGCCCAAGCTTCTTTCTATTCCAAGCAGAATACCAAGTGTTCAGCCTATGCCGGTGGCTAATTTTTCATTCAGACT…	AACTTTCCTTGCCGTTATCTATCGTATCGGTGCACACCTCAGATATGAATCTACAGCACAGCTAATATGCTACTAACCTCTTGAAAACCCGTCCCTTACGAAAAAAGAAGAAGCTATAAAAAGGACTGCACCTTCATTGTTTGCACCTGGACATTCACCCAAACATGTTCTCAGCTTTTTTTTTAACTGAAACTTTTTTGATAGTTTCTGGGTAGATGATCTTTTCATGCCGCGAAATGAAAGTAGGCGTGGCAGCGAGAAGGTCTTTCTCTCTTCCTGTGATATTCTCCTTCTAGCGATGCGCATCCTCTGCCCTGAGGTCTGGCCCAAGCTTCTTTCTATTCCAAGCAGAATACCAAGTGTTCAGCCTATGCCGGTGGCTAATTTTTCATTCAGACT…
RPL17B	S_Mikatae	1.02458	0.0537095	AGATTTTTCTTGTCTTTATCTATCCTACCGACTCACCATCTCTGGTATTAATCTTTAACACAACTACCATGTCAGTATCATCTTAAAAACCCGTCCCTTACGAGAAAAGGAAGAATATAAAAAAGACAGCTTTCTTTACAATTTGACCCAGACATTTAGACCCAGACATTCTATTTTAGTATTTCTTTTACTGAAACTTTTTCCTCGACGTTTTAGGCAAGTGATATCTCCATGCCACGGAGGAAAGGTAGGCGGGCCGAGCAGGAGGCCACTGCGCTCTTCCGATGACAATCTCCTTCCAAGGAGATTCCACCATAGGCCTAAGCATCGGCCTGTTACAAGCAGAATTCGAGGAGTTCGGCCTACGCAAACGCAGCATGGCTATTTTTTCATCAAGCG…	AGATTTTTCTTGTCTTTATCTATCCTACCGACTCACCATCTCTGGTATTAATCTTTAATACAACTACCATGTCAGTATCATCTTAAAAACCCGTCCCTTACGAGAAAAGGAAGAATATAAAAAAGACAGCTTCCTTTACAATTTGACCCAGACATTTAGACCCAGACATTCTATTTTAGTATTTCTTTTACTGAAACTTTTTCCTCGACGTTTTAGGCAAGTGATATCTCCATGCCACGGAGGAAAGGTAGGCGGGCCGAGCAGGAGGCCACTGCGCTTTTCCGATGACAATCTCCTTCCAAGGAGATTCCACCATAGGCCTAAGCATCAGCCTGTTACAAGCAGAATTCGAGGAGTTCGGCCTACGCAAACGCAGCATGGCTATTTTTTCATCAAGCG…
RPL17B	S_Bayanus	1.21544	0.0259456	AGTGTTTCCTCTTTGTTACCTATCCGATTGAGGGCCCATCTCCTACTAAAATCTACCTGTACACCTTATGCCACTATTCTCTTGACAAACCGTCCCTTACGGAAAAAATAGAAACAAAAAAAAGACCGGCATTTTGGTTTTACACCTGAACATCCTCAACCCAAACATAATACTTTTTTTATTATTTTGGTGCCTGAATTTTTCGTCTGGAATATTTCCGCGGGTGATGTTACCAGTTGCGTTTCTTACGCTAAGGGAACCATCGTGCACGCAGAGAATGGATACCAGTTCCAGGCTCTAGTGCGCATCCTCTCTGGGCAGAACACCTCTCTGGGCTGGTGCTTCTGTCCAAGGATTTCGCTTTCCCAGGCAGAAACACAACGGTGTAACCTGTGCCGA…	AGTGTTTCCTCTTTGTTACCTATCCGATTGAGGGCCCATCTCCTACTAAAATCTACCTGTACACCTTATGCCACTATTCTCTTGACAAACCGTCCCTTACGGAAAAAATAGAAACAAAAAAAAGACCGGCATTTTGGTTTTACACCTGAACATCCTCAACCCAAACATAATACTTTTTTTATTATTTTGGTGCCTGAATTTTTCGTCTGGAATATTTCCGCGGGTGATGTTACCAGTTGCGTTTCTTACGCTAAGGGAACCATCGTGCACGCAGAGAATGGATACCAGTTCCAGGCTCTAGTGCGCATCCTCTCTGGGCAGAACACCTCTCTGGGCTGGTGCTTCTGTCCAAGGATTTCGCTTTCCCAGGCAGAAACACAACGGTGTAACCTGTGCCGA…
RPL18	S_Kluyveri	1.38474	0.0465283	CGATTTTCTTTTCTTTTAATTCTTTGAAAGTGATCAATAGATCATTCCATAAAGTGGATTTATACATCAGATTAAAAGGTTCGCATAAGGTAAGATGCCCACTATGATCAATCAAAAGGGCGGATATAAAATTTCAGGCATCATTCGTACTAAACTCGTCAACCTCGTCCCAATTTTCCAAATACGAAAGGGAGAGAAGTTGGGTTTATGGTTCGAAAATTCATGGCTCATTGGGTCGAAGTTGCTCTTAGTTTGTATTCTATATATCTCAGAAATCATAATCCAAACACATGAAAACTAAAGTTTAAAACCTAGACTATACTGTAAGGGCTGAGGCTTTAAAAAAAAAAAAGTTAGAAGAAACAGTAGACTACATGGATGCTAAAAATGAATATAAAA…	-
RPL18	K_Lactis	0.725808	0.0110616	GTCTACTGGCAGCATAACTAAACGGAAACATATTCACACTTATATCCAATATATATATGTACATGATATAATTGACAGATTTTAACTGTTGATCGTCAGTCTGATGTGATGACACTGTCACTGGACAGAAGCCGAACACAGGTCACATGACTAACATATGTTTTCTGGGACTGTTTGAGAATGTACGGATGTAGTTTTTTCAAAACTAGAAAACCAACAATATATTACCTAAATAGGAATAAAGTTTTCAAAACTCATCAACTCACTGACATCGACAAATTTCACATCGTTACGAGTAGTGCATATATGAAGAAACCATCTTTCAATACAGTTAATCATACCATTAAGCATATGTTCTAATGTACTATTATCTCGATTAATTCTTGAAAGAACACACAC…	-
RPL18A	S_Cerevisiae	1.85325	0.0198662	GGTCAGCGTTCAGAAGCGTTCCAATAGGGGGGGGGGGGGGTATTTCGTTGATACCTATGTGGCTATATAGTCGATCTAGCTTTAAAAACTCTAAAGCATATATACATATATACATATTTAGCGTCATGCCAAGAATTCATAATTTCGAAGACTGTTTTCTACATATCTTATGTGGTGTACGGATATGAATTTTTTTACCGAAGACAATAATGCATGGGTGTTAATTCTATTTTTTTTTTTTTCTAATTCAGAATGAAATTTTTTTCTTGCTGGAGATTACAGTGGAAATTTCGCTCCAACACACGCACTCTCTCTGACTTGGTGCTGCCGTGAGATTCTGGTTCCTCAAGGAATATTGTATGAGATAATTTAAAACAAATTGAGTTGAAGATTCATCAA…	GGTCAGCGTTCAGAAGCGTTCCAATAGGGGGGGGGGGGGGTATTTCGTTGATACCTATGTGGCTATATAGTCGATCTAGCTTTAAAAACTCTAAAGCATATATACATATATACATATTTAGCGTCATGCCAAGAATTCATAATTTCGAAGACTGTTTTCTACATATCTTATGTGGTGTACGGATATGAATTTTTTTACCGAAGACAATAATGCATGGGTGTTAATTCTATTTTTTTTTTTTCTAATTCAGAATGAAATTTTTTTCTTGCTGGAGATTACAGTGGAAATTTCGCTCCAACACACGCACTCTCTCTGACTTGGTGCTGCCGTGAGATTCTGGTTCCTCAAGGAATATTGTATGAGATAATTTAAAACAAATTGAGTTGAAGATTCATCAAT…
RPL18A	S_Paradoxus	1.77851	0.0432098	GGTCTACGTGCAGAAACATTTCATTCCAATAGGGAGACTTTTGTTGTTACCTCCGTAATTATATATTCGCTGTAGCTTTATAAACTCTATACTACCATATATATACATTTTTAGTGTCGAACTAATAATTTGTAATTTCGAAGACTGTTTTTTTAAGCCACCACGTGGTGTACAGAGTGGTGTACAGAGTGAAATATTTTTAGTGAATATTCACAATGTATGGGTGTTACAACTTTTTTTGAATTTAAAATGAACTTTTTTTTTTTGGAGTTTACATCGGAAATCTCGCCCTCGCAAACGCACTCCTTCACCTGACGCTACCGCTAGCTTCTGGGCTGCTCAAGCGATGTCGGTGAACTAATTTAAAACTAGATGAATTGAAGCTTTATGAATTCTGAC…	GGTCTACGTGCAGAAACATTTCATTCCAATAGGGAGACTTTTGTTGTTACCTCCGTAATTATATATTCGCTGTAGCTTTATAAACTCTATACTACCATATATATACATTTTTAGTGTCGAACTAATAATTTGTAATTTCGAAGACTGTTTTTTGAAGACACCACGTGGTGTACAGAGTGAAATATTTTTAGTGAATATTCACAATGTATGGGTGTTACAACTTTTTTTGAATTTAAAATGAACTTTTTTTTTTTGGAGTTTACATCGGAAATCTCGCCCTCGCAAACGCACTCCTTCACCTGACGCTACCGCTAGCTTCTGGGCTGCTCAAGCGATGTCGGTGAACTAATTTAAAACTAGATGAATTGAAGCTTTATGAATTCTGACATCTAAGAAACA…
RPL18A	S_Mikatae	1.59334	0.0314518	TGTAAGTTTTGAAGTTTATATTCTAAAAAGGACACATTAAGCAATTTTCCATTGTTATCTACGCAAATATATGCATTGTAGTCTTATACTCTTTATACCATCATACATACAAGTTAGTGTCATAATAATATTTTTCAAGTATGAAGACTGTTTTTAGATGTTATGTGGTGTACCGAGTGTAATCTCTGAGAATATAATTTATGGGTGTTGTATCTTTTTTCCTAATTTTTTTCTGATTTGATTAGTTTTTTCTTGGAATTTACATGGAAATTACCCTTTGGCGTACGCACTCTCTTCAATTTGACACTGCGACAAACTTTCGGGTTCCTTAAGCGAGTTGGTGAACTAGTTTAAAACTGGTTAAGTTGATAACTTTCTGGTTTATACTTTAAGGAATAG…	TGTAAGTTTTGAAGTTTATATTCTAAAAAGGACACATTAAGCAATTTTCCATTGTTATCTACGCAAATATATGCATTGTAGTCTTATACTCTTTATACCATTATACATACAAGTTAGTGTCATAATAATATTTTTCAAGTATGAAGACTGTTTTTAGATGTTATGTGGTGTACCGAGTGTAATCTCTGAGAATATAATTTATGGGTGTTGTATCTTTTTTCCTAATTTTTTTCTGATTTGATTAGTTTTTTCTTGGAATTTACATGGAAATTACCCTTTGGCGTACGCACTCTCTTCAATTTGACACTGCGACAAACTTTCGGGTTCCTTAAGCGAGTTGGTGAACTAGTTTAAAACTGGTTAAGTTGATAACTTTCTGGTTTATACTTTAAGGAATAG…
RPL18A	S_Bayanus	1.2813	0.0556374	TGCAAGTTCTAAGCCAATATTCCGACATCATTCCGTGATGGATACTGTTTAACTACATAAGCGATCACCTATGCATTATAGCTTCATATACTCTACACTATAACACATACATATTAATGACATACTAATGCCCCAATAGTCATTGTGAATTTTTCAGGACTGTTTTCCAAACGTACGCGGTGTATAGGTGCCATGTAATAGGAAGTGTGTGGGTTGAGGTTTTTTCAACAGAGTGACTTTTTTTTTTTGGAAACTGATGCTGGAAAATCTCAATCTAGGGAACGCACTCTCCGCCGTTTGAAGCTTTACTATACTCTTGGTTTGCTCAAGCGATGTTGGTAAACTACTTTAAAAGTGAATGAGTTGAAATTCTAAATACTGTTAAAGGTTTAGTAATCA…	TGCAAGTTCTAAGCCAATATTCCGACATCATTCCGTGATGGATACTGTTTAACTACATAAGCGATCACCTATGCATTATAGCTTCATATACTCTACACTATAACACATACATATTAATGACATACTAATGCCCCAATAGTCATTGTGAATTTTTCAGGACTGTTTTCCAAACGTACGCGGTGTATAGGTGCCATGTAATAGGAAGTGTGTGGGTTGAGGTTTTTTCAACAGAGTGACTTTTTTTTTTGGAAACTGATGCTGGAAAATCTCAATCTAGGGAACGCACTCTCCGCCGTTTGAAGCTTTACTATACTCTTGGTTTGCTCAAGCGATGTTGGTAAACTACTTTAAAAGTGAATGAGTTGAAATTCTAAATACTGTTAAAGGTTTAGTAATCAC…
RPL18B	S_Cerevisiae	1.23783	0.009699	GCCGAAGGCAGGGATAAGGAAGGAATGCAGTTGGTTTTCTATGGACTACTCTTTTAAATGATATATGTACCAATAAAGATGGAGTAGGCGTAATAACAAAGTTTCAAGGCCATATATAGCGCCTTATATATACACATGCATGTATTTATCACGAATTTTATTTTCCTCGAGAATCACCACCGTTCATTACAAGACTATACCAGAAGACGCCAAAATCAGACAGAATTGATCTGGCGGTGCCTTATTCGGAAGTACAAGATCAGTATCAATGTAGTGACTCTGCTACATTTCGTGTCAGGATCTTCACCTTTTGGCGACTGCTAATGGCTATATATACCGTCATTTTCGCGTCACTTCTTTGTGCTTCCTGCTTTTTCGTGACGCGCGGTTTTGAAAACA…	GCCGAAGGCAGGGATAAGGAAGGAATGCAGTTGGTTTTCTATGGACTACTCTTTTAAATGATATATGTACCAATAAAGATGGAGTAGGCGTAATAACAAAGTTTCAAGGCCATATATAGCGCCTTATATATACACATGCATGTATTTATCACGAATTTTATTTTCCTCGAGAATCACCACCGTTCATTACAAGACTATACCAGAAGACGCCAAAATCAGACAGAATTGATCTGGCGGTGCCTTATTCGGAAGTACAAGATCAGTATCAATGTAGTGACTCTGCTACATTTCGTGTCAGGATCTTCACCTTTTGGCGACTGCTAATGGCTATATATACCGTCATTTTCGCGTCACTTCTTTGTGCTTCCTGCTTTTTCGTGACGCGCGGTTTTGAAAACA…
RPL18B	S_Paradoxus	0.925531	0.0349562	GCCGAAGGTAGTGGTAAAGAAGGAATGCAGTTGGTGTTTTATGGACAATTCTCTATATTGAGAAACAACCCAATACAGAAGCGGTAAACGTGATAACAAGGTTTCCAAGGCCTTATATAGCGCCTTATATATACATATATATGTAAATATTATGAATTTAATTTTTCACGAGGATTACCATCTTTCACTACAAGACTGTGGTCGAAAACGCCAAATTGCAACCGCACTGATCTTGCAGTGCTCTATTCGGAAGTACGAGATCAATATCAATGTACTGACTCCTATACATTTCGTGTCAGGATCTTCACCATTTGGCGACCGCTAATGGTTATAAATACTGTCATTTTCGCGTCATTTCGTTGTATATTCTGGGTTTTTCGTGACGCGCCGATTGGAAAC…	-
RPL18B	S_Mikatae	0.88624	0.0407266	GCCGAAGATAGCAGTAAAGAAAGAATGCAGTTGGTTTTTTACGGACCTTGCTCTCTATAAAGAGACAGGCCAAGAAGATGGAAGCATGATGACAAGGTTCTAAGGGTATGTTTAGGGCCTTATATATACATAAAGACATAATGATTTAATTTTCATGAGGATTGCCCATCTTCCGCTTCAAAGCTGTGGTGGAGACGCCAAAACTGCAACAGCATTGATCTCAAAGCGCTCTATTTGGAAGTACAGGATCAAGATTAGGATCAGGATCAACATTTTTGATCCTACACATTTCGTGTCAATACCCTCACCATTTGGCGACTACTATGGCTCTGAATACCTTCATTTTCGCGTCATTTCATTGTATATTCTGGTTTTTCGTGACGCGCGGTTTTGAATTAT…	-
RPL18B	S_Bayanus	1.16143	0.051618	GTCGAAGACAGTGTAAAGGAAAGGATGCAGTTGGTGTTTTGCGAGCTTTTATTTGTAGCAAAAAAAAAAACTGACAAATAAGAGGAAGAACCTGATAAATAGCTTTCCAAGGACAGTGGCAGCACCTTATATATATATATATATATATATATACAATTTTAATATCCGCAAGCATTCGCATCTCTCACCACAAAAAGCTCCCAAAGGCGAGGTGGAGAACGCCAAACAGCAGGAACAGCATTGATCTTGCGCTTCTCTATTAGGAAGTGCAAGATCAGATCATTATTTGGATCCTTATACATTTCGTGTCAAGCTCCTCACCATTTGGCGACTGTTAAAGGACATGAATACTTTTATTTTCGCGTCACTTTCATAGCAAACTCGGGCTTTTTCGTGACG…	-
RPL19	S_Kluyveri	1.48072	0.0591843	TGTTTCTGTTTTTCTTTTTAGTCTAGTGTGTCTTCCCTTGCAACGAACTCTGATGGACATGAGAGCTCATCTCTAATTTGTGAAAAATTTTATTAGATGCCGACACATTTCTTTTTTTTTATGTGCCGTTTTAAGTTATCTATTAAAACAGTCATGGTTTTTAATTAGTTCGCACCCATACCCCCGATATGTGTATTACTGTCTTTATTTTTCTAAGCCCACACATTATACGAAAAATGTCTCGGATTTTTCAAGCACCTACGTGTGCGTCGTGAAACATTTAAGGCGAGGTTAGTTCAGCTGCTTGTGGCTCACAGCCGGCAATTCAGTACCCCCCCCTCCCCCCGCCCCCTCGCTAGCGGTATCCTGCCAGAGTCACCGCGAGACACACACCACTTC…	-
RPL19	K_Lactis	1.57438	0.0344994	GGTGAATTATGTACTAGTTGGTTCTCGAGCTTCCTAAGGGGTCTATAAATGGAGCAGTTCACCTCATCTCAACTTATCTCATCCCATCTCATAGAGCAAGTACATCTTAGTCGACAATTAAATTTTCCTAGAGTCCATATCTCTAAACACGTTTCTTTTTCTGCATGGACTGTTCTTGTGACTGTTTACATCCGTACATTATTTGTATATTTATTTCAAGATGTGTAGTATTTTCTCATTTCCTAATAAGGGAATGCATAATCTGGAAAGAACATGAAAAACAGCAAAGTCTGGGAAGGAAGAGCTCTGATGGCCAGAGCTGTGATGGGGGAATCACTGTCTGGAGCCAGACTCCATCTCCCCGCCTAGCGTGGAAACCGAGACCTGCGTTCTCTGCCT…	-
RPL19A	S_Cerevisiae	1.71643	0.0346516	TCACTTCAGGTAAACCGTCTTCAATTGAGTTAATTATACTCACACCACTTCTTTAGTCTTTCTATCTGAAATCATTCAAGCGCACTTTAGATTCACTTCAACGCCTAATGAAAAGGACAATGGAAAACCCTTCTCGAGAAATCTTATATGTAATTTGAAGGCAACCAAACAATGAAAAAGAAAAAAAAAAAAAAAAAGGAAAAACTTTATTTCAAAATTCGTCAACCCACTAAGGTTTATTACAAGTTCGTCTCATTTCCTTTTTTACACCCATGCATTTTGTCATCCAGACATTACGCATTTTCCGTGAAGATTTTTTTTCTTCGTTTCGTTTAATATCCGTTCTCGGTGAGGAGGCCATTGGAAGCATGTCTTCCGCTTAGCACCAGACTGAGAGAG…	-
RPL19A	S_Paradoxus	1.63437	0.056495	TGTTGTTCAGGGCCCAATATATTACTGTAAGCTAACCGGTTTCAATTGAGTTAGTTATACTCACACTACTTTCTACTTCGTATCTGAAATCATGTAAGTGCATTTTAGATGCACCTTAACGCCTGGTGAAAGAACAATGGAAAACCCATCTCGAGAAATCTTACATTTTATTTAAAGGCAACCGGACAATGAAAAAGAAAAAAAAAAGGAAAAACTTTATTTCAAAATTAGTCAACTTTATGAGGGTAATACTGAGTCTCTAACATTTCCGTCTGCACACCCATGCATTTTTTCATCCAGACATTCACATTTTTTGTGTAGCTATTTTTTTTTTCTGTTTCGTCTGATACCCGTTCTCGGTACAAGGAAAATTGAGTTATGTCTTCTGCTTGGAACGTA…	-
RPL19A	S_Mikatae	1.69041	0.0474688	TGCTTTTCAAAGACTATTGTATCAGTGTAATTTGACCGTTTTCAATTGACTTAGTTGTACACACACTACTTGTTCCAGTTGCTACTTAGAATCATTTAAGTGTGTGATATATACAGGCCAATTCCTGACAGAAGAACAATGGAAAATACATCTCAAGAAATTTCAAGTTTATTTAAAGGCAACCGAACAATGAAAAAGAAGGGAAAAAAAAACTCTATTTCAAAATTAGTCAATACATTAAGGATGAAAATGGCTGCCAATATTTTGTATAATACACCCATGTATTTTACCATCCATACATTCTTAAAACCACTTTTTTTCGGAGACTTTTTTTTTTCATTATCATTTGATTTCCGTCATGTCGCTGGTAAGAATTCCACCACAGGGCGATGATACAAT…	-
RPL19A	S_Bayanus	1.51428	0.0262591	TTTTCTTTTCAAGATCCCTGTATATTGTTAATCTATCTGCGATTAATTGAATAAGTCAACGTCACCCTATTAAATAAAGTTTTCTATATAGAGAAATGCAAGTGTACCTAGAGGCACGTTTATTAAAAGAACAATGGAAAACCTATAACGAGAAATTTTATGATATATTTAAAGGCAAGCAAACAAAGAAAAAAAACTTTATTTCAAAATGGGTCTATTCTAAGGGTAATACCCAATGCGAGACTTTTCAAGTCCGTACACCCACACACTTTAACATCCATACATGTTTTTATTTTTCTTCAAAGATTTTTTTTCTTATGCGTGATGCCCCCGCCCGCCGCCAGCAGACACTTGCAAAGCGTTTTCCACTAGGAATGAAGGTCTAAGCGGACGCATAGC…	-
RPL19B	S_Cerevisiae	1.45539	0.0243356	AACTTATTTTATATGCTGAACTCTTGGTTTGTCATCAGTGTCAATATATCAGAATGTTTTACTAATACCTAGTACGAAAATTTTTCGTAGAGCCTCATCGCTCTGTCTCTCGCTATCCAAAAAAAAAAAAAAAAGTGGAACTGGATGAATATTGCGTATAAGGACAGTGTTTTAAAACCCAGACATATTTTTCACCAGTACCTCTTGGAAAACGGAAAAAGTTTTTTTGCGAATACTTTCAATTCTTGAGTTGTAAGGCTGCATCCCTCCGTAGAACAAACCAGAGAGCCGAGCTTAGTAATGAGCTTACGGAATGTTCGTCCCACTGGGAGGGAGTGGCAATACCGTCTAACCTCTCGCCTACGTTCTCATCGCTATGGGAATTGGGCAGGCCTGGTG…	AACTTATTTTATATGCTGAACTCTTGGTTTGTCATCAGTGTCAATATATCAGAATGTTTTACTAATACCTAGTACGAAAATTTTTCGTAGAGCCTCATCGCTCTGTCTCTCGCTATCCAAAAAAAAAAAAAAAAGTGGAACTGGATGAATATTGCGTATAAGGACAGTGTTTTAAAACCCAGACATATTTTTCACCAGTACCTCTTGGAAAACGGAAAAAGTTTTTTTGCGAATACTTTCAATTCTTGAGTTGTAAGGCTGCATCCCTCCGTAGAACAAACCAGAGAGCCGAGCTTAGTAATGAGCTTACGGAATGTTCGTCCCACTGGGAGGGAGTGGCAATACCGTCTAACCTCTCGCCTACGTTCTCATCGCTATGGGAATTGGGCAGGCCTGGTG…
RPL19B	S_Paradoxus	1.49563	0.0379903	ACCCTAATTTATAAGCTTAATTCTTCGAATGTCGTCAATATTAATAAATGGAGTTGTTTTTACTAATTTTTAATACGAAAATTTTTCATGGAACCTCATCGCTCTGTCTCTCGCAATCCAAAAAAAAAAAAAAAAAAAAAAGAGAAAAATAGAACTACATAAATGCGCCTTATGTGAGACAGTTTTTAACCCAGACATATTTACACCTGTACCTCCTGAAAATAAAAAGGATTTCCGCAAGCATTTTCAATCCTTCTGAGTTGTGGAGGCTGCATCTTCGTGTGGGAGAAACCCGAGAGCTGAGCTTAGTAATGAGCTTAGAGAACGTCCGTCCCTCTGGAAGGAGGCAGCACTTACTGCCTGGCCTCTCGCCTCTGTTCTTATCGCTGTGGGAATTGC…	ACCCTAATTTATAAGCTTAATTCTTCGAATGTCGTCAATATTAATAAATGGAGTTGTTTTTACTAATTTTTAGTACGAAAATTTTTCATGGAACCTCATCGCTCTGTCTCTCGCAATCCAAAAAAAAAAAAAAAAAAAGAGAAAAATAGAACTACATAAATGCGCCTTATGTGAGACAGTTTTTAACCCAGACATATTTACACCTGTACCTCCTGAAAATAAAAAGGATTTCCGCAAGCATTTTCAATCCTTCTGAGTTGTGGAGGCTGCATCTTCGTGTGGGAGAAACCCGAGAGCTGAGCTTAGTAATGAGCCTAGAGAACGTCCGTCCCTCTGGAAGGAGGCAGCACTTACTGCCTGGCCTCTCGCCTCTGTTCTTATCGCTGTGGGAATTGTGCG…
RPL19B	S_Mikatae	1.45688	0.0113729	GTCTAATTTTATACGTTCAACTTCTCGTATGCTAATAAAATTTATACAGCGGATGGTTATTCCAATTTTTAGTTATGAAAATTTTTCTAGAATCTCATCGCTCTGTCCTGGCCGCAAAAAGAAAAAGGAGAGTAAATTAAGTATTTTTCAGGACAGTATTCACCCCCACCTCCAAAATATTTACACCTGTACATCCTAGAAATTTTGGAAAGTTTTTTTAGTTAAAGATTCTTAATCCTCCAAGTTATGAGGCGCCATCTATGTAGGAAACTAGGCAGCCGAACTTTGTAAACGCTTGCAGAAGGGATGTCCCGCTAGAGGGAGAGAGCGCCTACTGTTCTATCTCCCGCCTACCTTTGTTATCGTCATGGGAATTGCGCGGACCGAGTTCGACTAGCC…	GTCTAATTTTATACGTTCAACTTCTCGTATGCTAATAAAATTTATACAGCGGATGGTTATTCCAATTTTTAGTTATGAAAATTTTTCTAGAATCTCATCGCTCTGTCCTGGCCGCAAAAAGAAAAAGGAGAGTAAATTAAGTATTTTTCAGGACAGTATTCACCCCCACCTCCAAAATATTTACACCTGTACATCCTAGAAATTTTGGAAAGTTTTTTTAGTTAAAGATTCTTAATCCTCCAAGTTATGAGGCGCCATCTATGTAGGAAACTAGGCAGCCGAACTTTGTAAACGCTTGCAGAAGGGATGTCCCGCTAGAGGGAGAGAGCGCCTACTGTTCTATCTCCCGCCTACCTTTGTTATCGTCATGGGAATTGCGCGGACCGAGTTCGACTAGCC…
RPL19B	S_Bayanus	1.59483	0.0368281	ACTTTATTTTGGGAGCTTGGATCCTATAATTCACCAACACTAATCCATAGAGTAATTTTAACAGATGTTAGTATGAAAATTTTTCATAGAGCCTCATCGCTCGGTCTTTGATATTGAGAAAGAAAAAAAGGAGAGAAAAACAAGACATGTTTTTCCAGGACGGATTCTTTTTCAACCCGGACACCCCTACACCTATACCTCCCGAAAAAACTGAAAATGCTTTTTGAAAACAAGCCACCGGTGAGTATTGCATCGGCGCGCCCACCGGTGAAAACAAACCGAACAGCCGAGCTTGGAAATGGGCTCTGAGGAGGCGGGTGGTGGTGGTGGTTCCCACTGGGGGGCAACAGCGCCTACTGCCTGGCCTCCCGCCTTTGTGGGTATCAGCATGGGAGTGCG…	ACTTTATTTTGGGAGCTTGGATCCTATAATTCACCAACACTAATCCATAGAGTAATTTTAACAGATGTTAGTATGAAAATTTTTCATAGAGCCTCATCGCTCGGTCTTTGATATTGAGAAAGAAAAAAAGGAGAGAAAAACAAGACATGTTTTTCCAGGACGGATTCTTTTTCAACCCGGACACCCCTACACCTATACCTCCCGAAAAAACTGAAAATGCTTTTTGAAAACAAGCCACCGGTGAGTATTGCATCGGCGCGCCCACCGGTGAAAACAAACCGAACAGCCGAGCTTGGAAATGGGCTCTGAGGAGGCGGGTGGTGGTGGTGGTTCCCACTGGGGGGCAACAGCGCCTACTGCCTGGCCTCCCGCCTTTGTGGGTATCAGCATGGGAGTGCG…
RPL2	S_Kluyveri	1.33854	0.0111736	ACTAAGAACAAAGTGAATGCCATTCTTAATTGTAATTTTTTATTAGTTTATGTTCTAATTGCTCTACGTTTGTACTTGTTTATGTTAATTTGAAGTAATGCCTTACAAAATCTGGTCTTTCTTCCGGTGTGGATTTTCACTTACACCTCTCTTGTCCTATAGCCGCCCACTTCGAGGCCGATTTCACTTGACTTTTCTGAACACAGAACCCATACATATGTTAGAAATCTGCTTTTATGTGGGGATACGATACAACATCCGGACACCAGGATGTCTTTTGGAAGAGAGTTTTTAGGTTTCCGTAACGAGAAATTGGGTGCGAACCGTAGAAAAAAAAGTTGTTCGGACTCCTCTGTGTCCAAAGCTCAGGCCTCCCCGTAGTTGTCGATTCGCGCCCGT…	-
RPL2	K_Lactis	0.877941	0.0242886	TACACATACTACTAGCATTACTACTTCTATCAATTATATAACTATGGTTTCATAAACAACATGCTTTTCTACGTAAAATGCAACAAAACAGTCATCGGGCGATCAGTCAATCAGTCAATAAATTCATTAGTGACACATTCAACATCAGCAAGTACACAATAACAGATTATGTGACTGTTCCACCTTACATCCGTACCTCAATGTATTTTATATATTTTTGGAATTTGGTTATACATTATTACTGTTTAAGGTAATACACATAAACTTTTTCAGAAAAACTTACACAAGGCAGTCCAATTGTGGTAAGGCTGGGTGTCCTGGGCAGACGTCCCCCTGCCGATATTCCTTTCCTCTAAGACTGAGCCGTTCTGCCAGGGGGAGCTGAGACACAGAGTCTCT…	-
RPL2A	S_Cerevisiae	1.13172	0.0317295	TGAAAAGGGGGTATAAACAGTGAGAACTTAACATAAAATACATATATTCGTTTATTGCTAAGTAAACTAAAATTGATCTATTATTTTTCTTTTCTTTTCTTTTGCGGCTGGGGGAACCCCTTTTAAGACAAAATAAGACTTTTTTCACCCGTACATTTTTAACACCCAATTCCTTTCCGGCTCCAACTTTCTTTTTTTTTCGAAAATGATGAGCTTAGTCCTGCGTCCGCTTCCCAAAGAAAAAATGCGTAAGCCTCTTTCACTTCGGCAGCTCACTCTTCCCACTTTCCCTGTATTCGAAGGTACCGTAGGCAGAGGCCTATCCTCATTCTCCCACTGTGTAAACTAGGCGTTCTGCCTAGCGGCTAAGCGTTCTCCGCGTATTGTTTCACCGTTGGG…	TGAAAAGGGGGTATAAACAGTGAGAACTTAACATAAAATACATATATTCGTTTATTGCTAAGTAAACTAAAATTGATCTATTATTTTTCTTTTCTTTTCTTTTGCGGCTGGGGGAACCCCTTTTAAGACAAAATAAGACTTTTTTCACCCGTACATTTTTAACACCCAATTCCTTTCCGGCTCCAACTTTCTTTTTTTTTCGAAAATGATGAGCTTAGTCCTGCGTCCGCTTCCCAAAGAAAAAATGCGTAAGCCTCTTTCACTTCGGCAGCTCACTCTTCCCACTTTCCCTGTATTCGAAGGTACCGTAGGCAGAGGCCTATCCTCATTCTCCCACTGTGTAAACTAGGCGTTCTGCCTAGCGGCTAAGCGTTCTCCGCGTATTGTTTCACCGTTGGG…
RPL2A	S_Paradoxus	1.17537	0.00664819	TGAGATGGAGTACAAACAGTAAGAAAGTGACATAAAATACATATGTTCGTTAATGGCTAAATAAAACTAAATTCTACCTATTATTTTCTTTCCTTTTGCGGCAATGCAATACTTTCGAAGACTATGCACTTCTTCATCCGTACATCCTCCAACACCCATTTCTTATTCGTGTAAGAGCTGCTTTTTTAAAATAATGAGGCCTTGCTCTGCGCGCGCTTTCCAAAGAAAATTGTGAAAGCCTCTTACCTCATGGTCTCCCACTTTTCCCACTTCCCCTTCTGCGTCCGTTAGTACTGTAGACAGAGGTCCGTCCCAATTTCCTGGTAAACATACAGGCAGTTCTGCCTAGCGGCCAAGCTTTCCCCGCCTACTCTGCCACTGCTTCCAAGCAGGGCTCCA…	TGAGATGGAGTACAAACAGTAAGAAAGTGACATAAAATACATATGTTCGTTAATGGCTAAATAAAACTAAATTCTACCTATTATTTTCTTTCCTTTTGCGGCAATGCAATACTTTCGAAGACTATGCACTTCTTCATCCGTACATCCTCCAACACCCATTTCTTATTCGTGTAAGAGCTGCTTTTTTAAAATAATGAGGCCTTGCTCTGCGCGCGCTTTCCAAAGAAAATTGTGAAAGCCTCTTACCTCATGGTCTCCCACTTTTCCCACTTCCCCTTCTGCGTCCGTTAGTACTGTAGACAGAGGTCCGTCCCAATTTCCTGGTAAACATACAGGCAGTTCTGCCTAGCGGCCAAGCTTTCCCCGCCTACTCTGCCACTGCTTCCAAGCAGGGCTCCA…
RPL2A	S_Mikatae	1.20883	0.0438973	TAATAAGGAAGTATAAACAGTGAAAAGCGTAAATTAGAATACATATATTCTTTAATGGCTAAATAAAAACTAAATACTATTACTACTAACTATTCATTTGCTTTTTACAGCCGCGCACCCCTTAGAAAAAGACAGTTTTTAACCCAGACATCTTTCAACACCCATAATTGTTTTTTTACGCGACAGAGTTTTTTCGAGAACGGACTAGTTTTGCTTTGCGTTGCTATATCCAAGTATTGGTGGAATTTCTCTCTTCCTCGTCTCTCCCCGTCTGCATTCGAAGGTATTGTAGACAGAGATCTATCTGTTCCTCCCTGTGAGCGATCAAGCAGGTTTGCCCAGCAGCAAAGCGGTCTCCTCCTAGCTCCTTGTAGTACCGAGCAGTGCAGTAGTACCGCT…	TAATAAGGAAGTATAAACAGTGAAAAGCGTAAATTAGAATACATATATTCTTTAATGGCTAAATAAAAACTAAATACTATTACTACTAACTATTCATTTGCTTTTTACAGCCGCGCACCCCTTAGAAAAAGACAGTTTTTAACCCAGACATCTTTCAACACCCATAATTGTTCTTTTACGCGACAGAGTTTTTTCGAGAACGGACTAGTTTTGCTTTGCGTTGCTATATCCAAGTATTGGTGGAATTTCTCTCTTCCTCGTCTCTCCCCCGTCTGCATTCGAAGGTATTGTAGACAGAGATCTATCTGTTCCTCCCTGTGAGCGATCAAGCAGGTTTGCCCAGCAGCAAAGCCGTCTCCTCCTAGCTCCTTGTAGTACCGAGCAGTGCAGTAGTACCGC…
RPL2A	S_Bayanus	1.32057	0.0284692	TTAAAGCTCTGCGCAACGAATCCACCACCACCAACACATATATTCTTCATAGCTAAATAAGATTAAAGCCATTCTTTTAAAAAAAAAAATAAACATGTTCTTCTTTACGGCAACCTGATCCTTCTGAGGACCGCCGCACATTACCACCCGTGCATCTTGTAACACCCATTTCTTTTAATGGTTTTTGTTTTTTCACCGAGTTTTTTTTTGTTTTCAAGTAGACCCTATATTGCGTGCCCTCGCTTAAAACCCTTCCGGTCTCGCCGCTACTCGGCCCGCCCACTGGCAGGCCCTCCAAACAGGGATCCGTGTCTCTCTCCCCTGGCCCTTCCGGCAAAACCAGCATTGGTTCTGCCTGGCTCCAGCAGTTCTCCTTCTAAGATAGAACTGTTCCCAGCA…	TTAAAGCTCTGCGCAACGAATCCACCACCACCAACACATATATTCTTCATAGCTAAATAAGATTAAAGCCATTCTTTTAAAAAAAAAAATAAACATGTTCTTCTTTACGGCAACCTGATCCTTCTGAGGACCGCCGCACATTACCACCCGTGCATCTTGTAACACCCATTTCTTTTAATGGTTTTTGTTTTTTCACCGAGTTTTTTTTTGTTTTCAAGTAGACCCTATATTGCGTGCCCTCGCTTAAAACCCTTCCGGTCTCGCCGCTACTCGGCCCGCCCACTGGCAGGCCCTCCAAACAGGGATCCGTGTCTCTCTCCCCTGGCCCTTCCGGCAAAACCAGCATTGGTTCTGCCTGGCTCCAGCAGTTCTCCTTCTAAGATAGAACTGTTCCCAGCA…
RPL2B	S_Cerevisiae	1.81484	0.0330282	ATCAATTGTGATTCCATGAACTCACAAACAACTCGCCTAAGAAACTGTCTAAATTTTTATGCACTAAATAGACCACAAATGAGAACGTAAAGAGAAGCTTTTATCATTTTATTTCTCTTCTCCTTAGGAGGAAATACAAATATCTTTTCTACATTTAATTCAATCTGACAGTCAAAGTTATACATATACATTATACCGATTACCAAGTTTTCAGACTAGAACCCATACATTATTTTACAAACCCAGACAGTACACTATACAAAAACCCAAGCAATTGCAATCAATTTTTTTGCACGAAAATTTTATTCGAAATCGCCAACCCGCTAGGGAGAAAAAGAAGGAATTCTCAAAGGAGAGGCTGGACAGAGAGGTCGTCCCAGTCTACCGCCTACGAGTAAT…	-
RPL2B	S_Paradoxus	1.76072	0.0480756	ATTACCTATAATCGCAGGACCGCATAAACGACCGCCTACGAAACTCTCTACTTTTCTATTCACTAGATAAAACTACAGATGAAAACGTACAGGAGACATATTATAATTTTTTTTTGACCTTCTCTAAAGAGATGGAAGCACCTTTTCTACATGTAATCGAATATGATAGTAAAGTTATACATATTTCATTATATCGATTAACAACTTTTCAGACTAGCACCCGTACCTTATCATATAAACCCAGACAATACATTATTTTAAAACCCAAACACCTGATGTTTTCCCTTGAAGAAAATATGTCCTCCTAGTTGTCAGCTCGCTCGAGAGAAAAAGAAGGAATTTTCAGAAGTTGGGACGGGGAGATGGCCTCGGTTTCCAGCCTAACCAGTAAGGCAAGGA…	-
RPL2B	S_Mikatae	1.79057	0.0568175	GTAGGTTATTACTCCAGGAGCGTATGAACAGCTGGCCACAGAGCCATGCAGATTTCTGTTCACTAGGTAGGCTATAGATGAAAACGTACAAGTGACTCATTATTTCTTTTCTGTCTCTAAAAGGAACGGAAATACCTTTTCTACATTTAATTGAATATGACAGTAAAGAGTTCTACATAATTCACTAGGTCGATAACTAAGTCCTCGGACTAGCGCCCGTACATGTTAAAGAACCCATACCGTAATTCTGTAAGCACCCAAACATTTTTTACACCTGAAGAAAATTGATACTTTTTTCAACCTCCAGCTCGCTAGAGAGAAAAAAAAGAAGTCTCGAAGGCAGAGATGGAGAGAAAGGCCCCAGTTTCAGCCTAGCCCACAATGTGCAGGGACTAACCA…	-
RPL2B	S_Bayanus	1.9449	0.0531743	GCTAGCTACGACGTCAAGCAGTGCACAAAAAAATCCTGGCCACGAAACAATTCGGTTTTCCCACTCGCTAGATATAATATAAATGAAAACGTAGATACATATTTTTTCTCTCTCTCTTTGGGGAGAACAGATGTTCTTCTTTTGGTATAATTGAACATGACAGCAAATGCTTGTAATAATGGTATGCCTGTGTTCAACATCCGTACCCCCAGGTGTAGAACCCAAACATTACACTAAGTGCAAAACCCAAGCAAGCGCCTTTTCATCATTCCCCGAAAGAAATATAGAACTATTCTATCCGAAAAAAAGCGAAGAGTTCTCTAAGGGCTGGGCGGAGAGGCAGGTCTGTTTGAGCCTAGCCGGTAGCCTCAGATGCCAGGATCCCCAGTGAGACGCCCT…	-
RPL20	S_Kluyveri	0.892353	0.00884932	GCGTCCCCTCTCCCTCCTTCTCGGAAAGTCAGCGTTCCGTGCAGAGGGCCCGTCCACGCCCGTCTCGCTCCCCTCGCTCCCCACCAGCCGTCGTAATACCACCACGCTCCACCCAGGGCAACCCGATTCTCTGCCTGGGACTACACTGGCTCTGGGGTCGCACTCCGCCTGAGGCCCCCCGTACCACCTACTCCCTTGGTATGACCCCAGCCTGGCAGCTTGCCTCCTCCGGCCGACCCTGCCCACTGCCCTCTGCCCTCTGCCGTGACCCGGCCTACTCCTCTCAGACATCCCCGCAGGGTTGGGGGGCCCTGTCGCCTAATCCCCCTTGGAAAAAATTTATGCTAGGCAAAACTTTTCGTCTAACGCCTCGGATTCTCTCTCTTTAAAACTTGAGTA…	-
RPL20	K_Lactis	0.57	0.0190444	TCTAACTTCCCGCCGCTGGCCCACGATCATCCTTTTCCCTCTCTATTCTCTCACCAACTTTGGTGTCGTCTCTTCCCTAACCTCTGCCTAGCTACGGGCTGGATATTGTGTTTGTCTCATGCACGCTGTGCTGGATGCCAATTCTGGAAATCACTCTGGTAGCTCCTGCTCTGTGTTTGGGTGAGAGTGTCAATGAGCACTTTCAGCTTAGTGGAAAGTATCAAATAATTGTATACAGAAATTTCATTGAACTTTCAACACATAGTATTGGTTAATAGGTTATAGCACTAAAGAGCAGAACCACCAAGAGCAGAACCACCAAGAGCAGTATCCGTCAAAAAGTGAGTACAGCAACACTTGAAGAGTATCCTCGAGTCGATAGTTAACGTCACAAGTACA…	-
RPL20A	S_Cerevisiae	1.42305	0.0241229	AAGGGCTGAAGCCGTCGGTGAATTTATCCCATGGTTCTACAGAGAACATAAACTATATACTATTTACATAATTAATTCTTAGACGTATAGGAAGAAGGCAGTTCTTCCTAACTCAAGAACTGCGTTATTCAATGTATGAATACGCTATCTTTTAGCTATAAATCTCCATTAAAAATTTGTATGCAATATGTGCCACAATCCTTCCTCATCTTTTTTTTGAGACTTTTAACCCAAACATAAAATACCCCCATACATCCAGAATAGCGTTTTTATGTCTCAAATAGTTAACTTTTTTCAGCGCGCGCAGAGCAGGAAACAAATTAAGCTCACTTCGGTGTGGTACCAGCCCAGGAATACCGCTTCTCAATAAGCGTTCCCCTCTAAACCCTGCTGCAATTT…	AAGGGCTGAAGCCGTCGGTGAATTTATCCCATGGTTCTACAGAGAACATAAACTATATACTATTTACATAATTAATTCTTAGACGTATAGGAAGAAGGCAGTTCTTCCTAACTCAAGAACTGCGTTATTCAATGTATGAATACGCTATCTTTTAGCTATAAATCTCCATTAAAAATTTGTATGCAATATGTGCCACAATCCTTCCTCATCTTTTTTTTGAGACTTTTAACCCAAACATAAAATACCCCCATACATCCAGAATAGCGTTTTTATGTCTCAAATAGTTAACTTTTTTCAGCGCGCGCAGAGCAGGAAACAAATTAAGCTCACTTCGGTGTGGTACCAGCCCAGGAATACCGCTTCTCAATAAGCGTTCCCCTCTAAACCCTGCTGCAATTT…
RPL20A	S_Paradoxus	1.74641	0.0660721	AACAGCTGAAGCCGTCAGAGCATTTATTCTAAGGTCCCGTGGAGAACAAAACCTATATAATACTTACATTATTTATTCTTAAACATATGGGAAGAAAATAATTTTGATGGTTCTCCCGAACGCAAGAAATATGTTAGTCAATGCATTACACGCTATCCTTTGGCTATAAATCTTCACTGAAAGTAGTACATAATTTACACTCAAAAAAGTTCTTTGCGGTCTTATTTTTTATAGACAGTAAACCCAAACACAACTATACCCCCATACATCCAGGATAGCTTTTTTTCCGCTTTTACTACTTCCTTTGCTGATTTGATTCCCTTTTCTATCCGCGCAGAAGGAAACAAGTTAGGCTCACTTCGGCGTGGTCCTACAGGCCGGGAACACCGCTCTCCAGTA…	AACAGCTGAAGCCGTCAGAGCATTTATTCTAAGGTCCCGTGGAGAACAAAACCTATATAATACTTACATTATTTATTCTTAAACATATGGGAAGAAAATAATTTTGATGGTTCTCCCGAACGCAAGAAATATGTTAGTCAATGCATTACACGCTATCCTTTGGCTATAAATCTTCACTGAAAGTAGTACATAATTTACACTCAAAAAAGTTCTTTGCGGTCTTATTTTTTATAGACAGTAAACCCAAACACAACTTTACCCCCATACATCCAGGATAGATTTTTTTCCGCTTTTACTACTTCCTTTGCTGATTTGATTCCCTTTTCTGTCCGCGCAGAAGGAAACAAGTTAGGCTCACTTCGGCGTGGTCCTACAGGCCGGGAACACCGCTTTCCAGTA…
RPL20A	S_Mikatae	1.82446	0.0594642	AATGGGAGGCACTTGAAGCATTTAATTCAGAAACTATATACTACTTTCTTTACTTAATTTTAAACATATGAGAAGAAGATATTATTTTGCATGCAGGCGCTTTGTGAATATATCGCACAGTGTTCCCTGGTTGTAAATCTAGACTTAGTTGTAAATAATGTACATAAAAACGTTTCTATTCTTCTTTTTCTGAGACCTTAAACCCGGACATTCTAGACCCCATACATCCACAATATTTTCATCATTATTTTTTGCTCTTTCAGAATATTTCGCTTTCGAGCCCGCGTGGAAGAAAAACGTAGTTGCTCACTTCAGTGCGGCACTAGAGGCAAGAAGTTCCTGCTGTCCAGTAGATATTCCCTTCTAGGTTCTGTTGCAGGTCACTAAGTCCACTCAAAC…	AATGGGAGGCACTTGAAGCATTTAATTCAGAAACTATATACTACTTTCTTTACTTAATTTTAAACATATGAGAAGAAGATATTATTTTGCATGCAGGCGCTTTGTGAATATATCCCACAGTGTTCCCTGGTTGTAAATCTAGACTTAGTTGTAAATAATGTACATAAAAACGTTTCTATTCTTCTTTTTCTGAGACCTTAAACCCGGACATTCTAGAACCCATACATCCACAATATTTTCATCATTATTTTTTGCTCTTTCAGAATATTTCGCTTTCGAGCCCGCGTGGAAGAAAAACGTAGTTGCTCACTTCAGTGCGGCACTAGAGGCAAGAAGTTCCTGCTGTCCAGTAGATATTCCCTTCTAGGTTCTGTTGCAGGTCACTAAGTCCACTCAAAC…
RPL20A	S_Bayanus	1.80224	0.0931955	AATAATTGAGGTGTCGGAACATTTTCTATTGTGAAAGTCCTCCCCCGGAAAACACAAACTATATACTATTTACATTATTTATTCTTAAACATATGGAAAAAAAATAGTCTTTTCATAGCAAGAGTTGCATAAGCAATCCCTTAGTACTATCTTCTTGCAACGGTTTTGAGCGGGTTGTACATAAGTACATCAGAAGAGGTTTGAGAATTTTCGGAACATGAGACTGAAAACCCAAACACTTTCAATTCCAAACACCGAGAAAAGCCCTTTCTTAATTTTTCCAAAGCTTTTTTTTCTTTTCAGAGGATTTTGCGTTTCGGCCCGCGCTGCTGTAAACAAAGCTGGGCCCAATCCTGCAAAGTATCGCGGGCCGAGAGCTCCCCCGTCCGGTGAGGACTT…	AATAATTGAGGTGTCGGAACATTTTCTATTGTGAAAGTCCTCCCCCGGAAAACACAAACTATATACTATTTACATTATTTATTCTTAAACATATGGAAAAAAAATAGTCTTTTCATAGCAAGAGTTGCATAAGCAATCCCTTAGTACTATCTTCTTGCAACGGTTTTGAGCGGGTTGTACATAAGTACATCAGAAGAGGTTTGAGAATTTTCGGAACATGAGACTGAAAACCCAAACACTTTCAATTCCAAACACCGAGAAAAGCCCTTTCTTAATTTTTCCAAAGCTTTTTTTTCTTTTCAGAGGATTTTGCGTTTCGGCCCGCGCTGCTGTAAACAAAGCTGGGCCCAATCCTGCAAAGTATCGCGGGCCGAGAGCTCCCCCGTCCGGTGAGGACTT…
RPL20B	S_Cerevisiae	1.62858	0.015068	TTAATATAGGCGAGAATTTCAATTTGTACCTACTGGCGCAAATTCAATAGGTGTTATCTATTGAAAGCACTGAACTTAAATTTACCAATGTATACACGCTCAACATAAAAAAGAGGTAAAAGAAAATATATTTTTTTGTAAGGAAAGGCTTAATAAATATTTACAAGCTAGATAAAAAAAAAATCAAATAGCAAGCTATTCTGTCATATCTTAAGGTGCTGATTGTTTGTAGGCACGAAGTAAACAAGCTCTTCCCCAAAACAATAAATACGGTTTTCGGGACTGTTCACCCGTACATTTTACGTTTCCGACGGCGCGATGCTATCTTTGAATTTTTATCTCTTTCAGGTAACCCCATGACCAGTAGGGCGGCTTACTACCGAAGAGAAAAATGTCCGC…	TTAATATAGGCGAGAATTTCAATTTGTACCTACTGGCGCAAATTCAATAGGTGTTATCTATTGAAAGCACTGAACTTAAATTTACCAATGTATACACGCTCAACATAAAAAAGAGGTAAAAGAAAATATATTTTTTTGTAAGGAAAGGCTTAATAAATATTTACAAGCTAGATAAAAAAAAAATCAAATAGCAAGCTATTCTGTCATATCTTAAGGTGCTGATTGTTTGTAGGCACGAAGTAAACAAGCTCTTCCCCAAAACAATAAATACGGTTTTCGGGACTGTTCACCCGTACATTTTACGTTTCCGACGGCGCGATGCTATCTTTGAATTTTTATCTCTTTCAGGTAACCCCATGACCAGTAGGGCGGCTTACTACCGAAGAGAAAAATGTCCGC…
RPL20B	S_Paradoxus	1.67179	0.0300926	TTGATATAGGCGGGAGCATTTTAAATTTGTGCTGATTCACTGGTTGGCGCAAAATTCAATAGATGTTATCTATTGAAAGCACTGAACTTAAATCCACCATGTATACACGTTCAACATAAAAAAAAAAGGAGAAGAAACCTATTTTTGTAAGAAAAAGCTTAATAAATATTTACGAGCTAGATAAAAAAACTAAATAGCATGCTATTCTGTCATACCTTAGGGTGCCAATTGTTTACAGGCCCAATAGTAAACATAGGAAACAGCTTGTCTCCTGAAACATAGAATGGGCCTTTCGGGACTGTTCATCCGTACATTTTTATATTTCCGGAATGGTGATGCTCTCCGTGAATTTTCGTTTCTTTCAAGTGCCTTCACCAGGACCAGCAGGCCGGCCTGCTA…	-
RPL20B	S_Mikatae	1.48108	0.00831191	TTGATGTATCCGAGAATCTTGAACCATCCTTTCCATTTACTGGATAAACGAACTTAATTGATACTATACTATCTATTGAGAGCATTGAAGTTAAATTCACTAATATATATACGCTTGATATAAAAAGGTAGAAAAAAGCCTATTTTCTATAAAAAAAAAGCTTAATAAATAGTTACGAGCTAGATAAAAAATTCAACAAGCAAGCTTATCTGTCATTTGCTATATTGCCAACTATTATGTTTACGTAATAGTAAACGTAAGAAACCCATTTTTTTTCTAAAACAAAACCATTTCGAGACTGAGCATCCGTACATTTCATGTTTTATCATATCATAGGATGTCTGTGTCTTTTCAAATTTTTCTACTGTTCCCACCAGAACCAGTAGGCCGGTGTGCTTA…	-
RPL20B	S_Bayanus	1.8124	0.0233235	TGATGATAAACGGAAATCTATAAAAGTTGTGGTGATTTTTATTAAAATAATGCGTATTCAATAGATGTTGTCTATTAATGCTGAATTCAACTTCACTAATATATACACGCTCAATATAAAAAACAGCTTAATAAATATTTTAAGAGCTAGATAAAAAAATCAAAACGAGAGACTGTTTTGCCTTTTCCTATGCCGTCTGATTTGTTTTTAGTGTAGCAGTTACATATTCAAATGGATTGTTTGTGGCGCATGAACTAAAAAGTCTGAGACCGCACATCCGTACATTTTACATATTCCTTTTGGTTTTCATAAATCATTTTCCGTCTTTTAAATTTTTCTTCGGACGCTGCCGCCGAAGATCAAGCCCGGCCTAGTTCTTTGCAGAGGAAAATTGGCCCA…	-
RPL21	S_Kluyveri	1.51418	0.0115117	TTGCATTAATACCATCCACTGTATTATTAGTATGTTATTTTTCTACTTTTTCCGCTCTTATTAAAGAAAGGGTTCTAACAGCTTTTCCAAGAAGTTACTGGTGTGAAACAAGAGAATAGTGCTTTGCCTTTCAAAATCTGTGTAGGTTTGGCTATCTGTGAACACTACAAATCTTTTGAATACTATATAGTACTTCTTTTTAATAAAAGCTGATCACTCTTTTTTGGTTTAAGAACTTTTATAAGAACTAGATTCTTAGATATGTGTTCTACGTTACTTCTTGTATAATAGTCAGTTAATTTGATATCAAATGCCGAAAATGAAGATATTGGTAGGAGTTCTTCGACAAATGTCTTTGTTGGAGCTCATTCACACCTCAACAATCGTTATCGTAGTAAT…	-
RPL21	K_Lactis	0.907116	0.0674962	TTTTTTATATTAGCTTTTGATCATTTTGCCTTTACTTCTTTTTCTTTTCAACTTCATTTCAGAGTTTTTATGATGGTTAAGAAGCTGATCCCAACTATTCACTGCTGTGTTGTGTATATAGAATTAACATCTTTCTCATGTGATTGATTTAAGCAGAAAACAGAAACAAAACTAGTGTAGCAGTTTCATTTAATATCATTTATCTCTGTTTTACAAAAACGGTATTTTAAGGTGTATATTACGATAATTAATTAATGGTTTTCTTACAGTGAGATCATTTTAACTACGTTCAAGTTGTCTTGGCTCGTTGAGAAACCATAACAAAATATATACCAGTTTACCTTTCACGGTACATTGCTTAAAAAACGTCGAAAGACATCTCTTTCAACTCATTCCGTC…	-
RPL21A	S_Cerevisiae	1.64912	0.0167089	AACTTTTCAAATCACGGATCATTTTTCATTTTACTTTGTCATTTTTATTTCATTTGAAAATGGGTAGAGGTACATAACTGGCGCTTTTCTTGCAAGATGACATGGCATTGGATGACACAAGTATTACTCAATACCCAACGTAAATAGCTAGAAGATTTTGATCGGATTTAAATTCCCAACTGCAACTCAGTAGCGTTTAGGATTTTACACCTTGGCTTGGAGAAATCCTTATTGTCAGAAATTGAAGCCGTTAATATTTAAAGGCTAATTCTCCATGCCATCTTGCATTCACTTTGGTATATATCTCTTGACCTCAATATATCTCGATAATATAAATCGCAATATTATACTTGTTAGTCTGACAGTTTTACACCTGTACATCTTCACCATCACCACACC…	AACTTTTCAAATCACGGATCATTTTTCATTTTACTTTGTCATTTTTATTTCATTTGAAAATGGGTAGAGGTACATAACTGGCGCTTTTCTTGCAAGATGACATGGCATTGGATGACACAAGTATTACTCAATACCCAACGTAAATAGCTAGAAGATTTTGATCGGATTTAAATTCCCAACTGCAACTCAGTAGCGTTTAGGATTTTACACCTTGGCTTGGAGAAATCCTTATTGTCAGAAATTGAAGCCGTTAATATTTAAAGGCTAATTCTCCATGCCATCTTGCATTCACTTTGGTATATATCTCTTGACCTCAATATATCTCGATAATATAAATCGCAATATTATACTTGTTAGTCTGACAGTTTTACACCTGTACATCTTCACCATCACCACACC…
RPL21A	S_Paradoxus	1.13555	0.0235877	AACTTTTCAAATCACGGATCATTTTTCATTTTACTCTTTCATGTTTATTTCATTTGAGAGTGAGTAGAGCTGTCTGAGCGGTACGCTCTCTGCAAAATGCTATTGGATGATACAATCATTACTCAGTATCTAATCTAAGTAGCTAGGAGATTTTGGCGAGGTTTGAGATCCCAAGAGCAACCTTGTAGAGCTATGGGATTTTACGTTCTGACTCGAAAAGCTCTTTTGTCAGAAAAAAAGCACCGTTTATGTTTTAAAGCGAAATCATCAAGGAGGTCGGCTGCTTCACCAGGTGCCGTTTAACTTTAACCTCTATTAAACCTTGTGACCTTAACGTATCCCAATGATAGAGATTATTATATTCCATTCGTTCGTCTGACAGCTTTACACCTGTACATC…	AACTTTTCAAATCACGGATCATTTTTCATTTTACTCTTTCATGTTTATTTCATTTGAGAGTGAGTAGAGCTGTCTGAGCGGTACGCTCTCTGCAAAATGCTATTGGATGATACAATCATTACTCAGTATCTAATCTAAGTAGCTAGGAGATTTTGGCGAGGTTTGAGATCCCAAGAGCAACCTTGTAGAGCTATGGGATTTTACGTTCTGACTCGAAAAGCTCTTTTGTCAGAAAAAAAGCACCGTTTATGTTTTAAAGCGAAATCATCAAGGAGGTCGGCTGCTTCACCAGGTGCCGTTTAACTTTAACCTCTATTAAACCTTGTGACCTTAACGTATCCCAATGATAGAGATTATTATATTCCATTCGTTCGTCTGACAGCTTTACACCTGTACATC…
RPL21A	S_Mikatae	1.28953	0.0531026	AACTTTTCAAATCACGGATCATTTTTCATTTTACTTGCTTCCTTTTTCCTCTTATGGAAGTGTAGAATCTACTCTCTTGAAAGTATTGTTAGGAAGAGTATAATTACTACTAAGTATTCAGCGCTTGACAAGGCTCTTGTTAAAGAAAAATTCACCGGTAACAGCCTCAGTCCGGAGTTTTGAGGAGAATAATTATTCTCCATGAAATGCTATTCAGTATTTGTGCAAACTCTCGAGGTCAATATACGTCACGTCAGCAACAGAGATTATTTAGCATTTATTTCAACAGACAGATTTACATCTGTACATTTCACTCATCCCAACACCATTCCAAAAACAAAAAGTAAGCGTGCTTCTAGCGGGCCGCTTTTCGAAGCGAGGCCGAACGTGCCCACAACC…	AACTTTTCAAATCACGGATCATTTTTCATTTTACTTGCTTCCTTTTTCCTCTTATGGAAGTGTAGAATCTACTCTCTTGAAAGGTATTGTTAGGAAGAGTATAATTACTACTAAGTATTCAGCGCTTGACAAGGCTCTTGTTAAAGAAAAATTCACCGGTAACAGCCTCAGTCCGGAGTTTTGAGGAGAATAATTATTCTCCATGAAATGCTATTCAGTATTTGTGCAAACTCTCGAGGTCAATATACGTCACGTCAGCAACAGAGATTATTTAGCATTTATTTCAACAGACAGATTTACATCTGTACATTTCACTCATCCCAACACCATTCCAATAACAAAAAGTAAGCGTGCTTCTAGCGGGCCGCTTTTCGAAGCGAGGCCGAACGTGCCCACAAC…
RPL21A	S_Bayanus	1.47141	0.0467164	AACTTTTCAAATCACGGATCATTTTTTAATTGAGTTTACTTCATATGCCTTAAGTCTCTTATTCAATTGAGAAAGTATAGATTATGTAAATTCTACGGTTCTTTGAAGACAGACCTTGAAAACACAAGCACTACACAGCCTGTTTACGCACAATACATTAAGTGTTCCGTAAAGCCTCGCATCATCTCAAGAGTCAGTATACAAATATACACTTTTCTTCATCATCGCCTGGGGAAAAAATGCAATCGACTTTTTGAAGTGTACATTGCTAAAGAGCCCGTATGTCTTATTTAAAGCAATACTGATTTCATTGTAAATCTCTTGGCATCAGTTGAGGTTATTAAAAAATAATGGTAATGTCATTACATGAATTAATTAACCGCTTTCCGTTTTCGAAAC…	AACTTTTCAAATCACGGATCATTTTTTAATTGAGTTTACTTCATATGCCTTAAGTCTCTTATTCAATTGAGAAAGTATAGATTATGTAAATTCTACGGTTCTTTGAAGACAGACCTTGAAAACACAAGCACTACACAGCCTGTTTACGCACAATACATTAAGTGTTCCGTAAAGCCTCGCATCATCTCAAGAGTCAGTATACAAATATACACTTTTCTTCATCATCGCCTGGGGAAAAAATGCAATCGACTTTTTGAAGTGTACATTGCTAAAGAGCCCGTATGTCTTATTTAAAGCAATACTGATTTCATTGTAAATCTCTTGGCATCAGTTGAGGTTATTAAAAAATAATGGTAATGTCATTACATGAATTAATTAACCGCTTTCCGTTTTCGAAAC…
RPL21B	S_Cerevisiae	1.05575	0.0384963	ACGTGTTGAAATCACGATACTGGCATCCGATAGGGGAGTTGTATTCACAATACTATCGATTTTGTAAAATAGGACGAAGAACTTTTTATATACGAGCATTTCCTAATTAGTAGGAAGCGGAAAATAATAATATAAGAAAGTAAACGCAAAAGATAGGCTGACTGCCTTCATTCGACTAGGAGGTGAGGCGACATATTTGTCACCATTCAAGTTACCGAGATGGTAGAGAGGTGGATGGCTCGGGTGAGCTTGATTGTACACTGCAGCAACGATGCTTTTTCTACCCATTTTATGAAGTTTAACATCCGTACCTTTCCACCTCCAAACATTTTTTGTAACTTCGTCCTTTGAAAAATCAAGAAGTAATAGGTGTGCAGTATAGGGCCGCTTGAGCGCGCA…	ACGTGTTGAAATCACGATACTGGCATCCGATAGGGGAGTTGTATTCACAATACTATCGATTTTGTAAAATAGGACGAAGAACTTTTTATATACGAGCATTTCCTAATTAGTAGGAAGCGGAAAATAATAATATAAGAAAGTAAACGCAAAAGATAGGCTGACTGCCTTCATTCGACTAGGAGGTGAGGCGACATATTTGTCACCATTCAAGTTACCGAGATGGTAGAGAGGTGGATGGCTCGGGTGAGCTTGATTGTACACTGCAGCAACGATGCTTTTTCTACCCATTTTATGAAGTTTAACATCCGTACCTTTCCACCTCCAAACATTTTTTGTAACTTCGTCCTTTGAAAAATCAAGAAGTAATAGGTGTGCAGTATAGGGCCGCTTGAGCGCGCA…
RPL21B	S_Paradoxus	1.03745	0.0183234	ACGTGTGTTAAAATCACAATACTGGCATCCGATAGGGAGTTTATACTCATAGTAACTGTCGATTTTGTAAAATAGGACGAAGAACTTTTAATATACAAGCATTTCATAATAAGTAGAAAACGGAAAATAATAACATAAGAAAACAAATGCAAAAAATTGGTTGAATGCCTCTTTGTGACTAGGAGATGAGGTGACACATTATGCCCCAAATTATCGAGATAGTCGAAAGATAGCTCAGATGCATTTGATTGTACACTAGTAGTAATACTTTTTTTTCAAATCATTGAATGAAGTTTAACATCCGTACCTTTTTACCTCCAAACATTTCTCTTACTTTATCCTTTGAAAAACCAACAAGAGATTGTGCACGCCCGCAATCTACGCGTTAGTTTGAGCGCG…	ACGTGTGTTAAAATCACAATACTGGCATCCGATAGGGAGTTTATACTCATAGTAACTGTCGATTTTGTAAAATAGGACGAAGAACTTTTAATATACAAGCATTTCATAATAAGTAGAAAACGGAAAATAATAACATAAGAAAACAAATGCAAAAAATTGGTTGAATGCCTCTTTGTGACTAGGAGATGAGGTGACACATTATGCCCCAAATTATCGAGATAGTCGAAAGATAGCTCAGATGCATTTGATTGTACACTAGTAGTAATACTTTTTTTTCAAATCATTGAATGAAGTTTAACATCCGTACCTTTTTACCTCCAAACATTTCTCTTACTTTATCCTTTGAAAAACCAACAAGAGATTGTGCACGCCCGCAATCTACGCGTTAGTTTGAGCGCG…
RPL21B	S_Mikatae	1.03591	0.0367923	ACGTTAAAATCACAATACTAGCATCCGATAGAGAATTATTTTCATATTACTATCGACATTGTATAATAGGACGAAGAACTTCTTCTATACGAGCATTTTTATAATAAATAGAAAACGCAAGGTAAAATTATAAGAATACAAATTGGTCAATTGCTTCCTATGATAGGGTCACCAAACTACACATATTTCGACGTTATTGGACTTCAGAGGTAGTTCAGGGTGTGAGCTTCACTGTATATTGGCCACAATTATTCTCCATCATTTATATATCAACATCCGTACCTTTCTGCCTCCAGACATATTTCTGATTTATTTTTTGAAAAACTAAAATGGGATAATATATGCCGCAGTCTGAATAGGCGTGAGCGCGCAGTATCTGGATGGGTGAGGTAAGATCCA…	ACGTTAAAATCACAATACTAGCATCCGATAGAGAATTATTTTCATATTACTATCGACATTGTATAATAGGACGAAGAACTTCTTCTATACGAGCATTTTTATAATAAATAGAAAACGCAAGGTAAAATTATAAGAATACAAATTGGTCAATTGCTTCCTATGATAGGGTCACCAAACTACACATATTTCGACGTTATTGGACTTCAGAGGTAGTTCAGGGTGTGAGCTTCACTGTATATTGGCCACAATTATTCTCCATCATTTATATATCAACATCCGTACCTTTCTGCCTCCAGACATATTTCTGATTTATTTTTTGAAAAACTAAAATGGGATAATATATGCCGCAGTCTGAATAGGCGTGAGCGCGCAGTATCTGGATGGGTGAGGTAAGATCCA…
RPL21B	S_Bayanus	1.1074	0.0306658	ACGTGTAAAATCACGATACTAGCATCACAGAGAGTTATATCTCAATACAATCAGCTTTGTAAATTAGGACTAATAACTTTTATATATACCGGCATTTCATAATAAGTAGAAAATGAAAAAAAATAACAACAATATAATCAAAATGATAGGCCACTTATCCATCTGTAGTCGTTATTGAAGTCAAGCTAATGATAGTTCGATTATACTAGCATGTAGCAATTTTTAAGATCGATAAATGCTTTTTTGCCGTGTGTAAGATACAACATCCGTACCTTTTTACCCTCCATGCATTCTGTCCGTTTTTTTTGACGCTTGAAAAATTAAAAATTAGTTAGTACGCCGCTCTTCTGGATATCGGCGTGAGCGCGCAACATCTGGGTAGGCCAGGTAGGATCCATC…	ACGTGTAAAATCACGATACTAGCATCACAGAGAGTTATATCTCAATACAATCAGCTTTGTAAATTAGGACTAATAACTTTTATATATACCGGCATTTCATAATAAGTAGAAAATGAAAAAAAATAACAACAATATAATCAAAATGATAGGCCACTTATCCATCTGTAGTCGTTATTGAAGTCAAGCTAATGATAGTTCGATTATACTAGCATGTAGCAATTTTTAAGATCGATAAATGCTTTTTTGCCGTGTGTAAGATACAACATCCGTACCTTTTTACCCTCCATGCATTCTGTCCGTTTTTTTTGACGCTTGAAAAATTAAAAATTAGTTAGTACGCCGCTCTTCTGGATATCGGCGTGAGCGCGCAACATCTGGGTAGGCCAGGTAGGATCCATC…
RPL22	S_Kluyveri	1.56926	0.054314	AAGCACTCTGTCCTTCTGATTCAGTGGCCTGCCCAACTTGGTCGTTGAACGAGCAAGGGAGACAGCTCTCGGTCTCAAAAGGCTATCACATGCTTAGGGCTCCAGAGATGACTACCAAAGTGTTAGTTAGGGCATGTAGCGTTAAAGATGACTCGAACCTCAACGCGTTACATCCGTACATATTTATTATTTTCTGCTGAAAAGTTCTTTTACAGCCATACACCATAACTAAGAGGCTTTAATTGTCAGCCTCTTCTTTTTAGAAAGTAAAGCCCGAGATCTTCAAACTCGCTCACCATTGGAATCGTGACGACGCACTAGTATGTGGATTTTTAGTTTTTCAATCATCTGAGTTATAGCTCGACTTTTCAAGAATTCTACATCTGTTCCACTCAAATA…	-
RPL22	K_Lactis	1.21495	0.0483063	ATGACTAACGAAGCTGTTATCCAGTATCTTGTCAGAAACTTTGAATTCTGTTAATAGTCCAATTCTTTCCGCACCCTACAGTCCGATTGTGTAAACACAACACTTTTAGTGCTAATTGAATCGATGCTGTTTTCATGTTCTGAAGCCCTTTAATCTTGATGTCAGGACTGTTCAATGGTGTCCTGATGTTTATAAGAATATTGTCCTTCTGAACCCAGACATATTTTCAAAAAAGAACTGTCAATGAATGACTTCCTATTTCAGCTATTTCGAAGGTTGTTTTTCTTTGGCGAAACCACTTCGATGATCTCGAGATGCATGAAACTTTTCGGCACAATAAACCTTTAACTTGGAAGATTATAGTTACATTTAACATCAACATTATAGCAGTATAGTTTA…	-
RPL22A	S_Cerevisiae	1.8446	0.0298821	TGTAATGTTCTAACAAAAATTTTTACTGATTTATAAAACTTATATAGATAGATAGACACATATATATATCTATATATAGAAACACAACTAAAGTTTACCATGTTTTATATAATATTACTACCGCTACTGAGTAAATGTTTAGCTTGTACTTAACTTTCAAAGACAGTTTTTTTGATAAACATCAGTACATTTAATAATACATCCATACATTTATGTTAATTTGTTTTTCCTTTCCACCTCAGTGCGCTTCTCTTTTGAAAAAATCCTCAACAGGCCACGCGAACAAATCTTACCGAGAATTTCCTAAAATGTTTCAAACTATCATTTAGCTGCATACAATATGTACATTATTAATTGAGATTAACAACTTTACCTGTACTTTACCGTTATCAAATTATA…	TGTAATGTTCTAACAAAAATTTTTACTGATTTATAAAACTTATATAGATAGATAGACACATATATATATCTATATATAGAAACACAACTAAAGTTTACCATGTTTTATATAATATTACTACCGCTACTGAGTAAATGTTTAGCTTGTACTTAACTTTCAAAGACAGTTTTTTTGATAAACATCAGTACATTTAATAATACATCCATACATTTATGTTAATTTGTTTTTCCTTTCCACCTCAGTGCGCTTCTCTTTTGAAAAAATCCTCAACAGGCCACGCGAACAAATCTTACCGAGAATTTCCTAAAATGTTTCAAACTATCATTTAGCTGCATACAATATGTACATTATTAATTGAGATTAACAACTTTACCTGTACTTTACCGTTATCAAATTATA…
RPL22A	S_Paradoxus	1.70807	0.0735174	TGTAATGTTCTAAAAAAATTTCACTGATTTTATAAAACATATATAGATAGATAGGTATATATATATATATCTATATATAGAAATACACTAAAGTTTACTATGTTCTGTGTAAATATTACTGCCCTTTCTGAGTAAATGCATTTACTTAACCTTCGGAGACAGCTTTTTTTGCAGAACATCAGTACATTTAAGATATACATCCATACATTTATGCTTGCTTTTTCTCTTCCCTCCTCTCTGCGCGTTTCTTTTGAAGAAATCCTCAGACTGCCACGCACAATTTTGCCGAGAGATTTCCAAAAAATTTCAAACTATTATTCAGCTACATACCATATGAACTTTGATAATTGAGATATACGACTTTACCTTTTCTTTACTAATATCAAATTAAAAATAACC…	TGTAATGTTCTAAAAAAATTTCACTGATTTTATAAAACATATATAGATAGATAGGTATATATATATATATCTATATATAGAAATACACTAAAGTTTACTATGTTCTGTGTAAATATTACTGCCCTTTCTGAGTAAATGCATTTACTTAACCTTCGGAGACAGCTTTTTTTGCAGAACATCAGTACATTTAAGATATACATCCATACATTTATGCTTGCTTTTTCTCTTCCCTCCTCTCTGCGCGTTTCTTTTGAAGAAATCCTCAGACTGCCACGCACAATTTTGCCGAGAGATTTCCAAAAAATTTCAAACTATTATTCAGCTACATACCATATGAACTTTGATAATTGAGATATACGACTTTACCTTTTCTTTACTAATATCAAATTAAAAATAACC…
RPL22A	S_Mikatae	0.881033	0.0283236	TGCCGAAGTTTTCCTATAATGCAATGTTTCAAAAAAATCTTAACGATTTTAAAGAACATATATAGATATATATATATAAACACACTTAAAGCTTACAATGTTCTGCGTAATACTATTGCGACTACTAAGCGTGCTTTCCTTTGGTCAACTTTTAAGTAGCGACTTTTTTCATAACATCAGTACATTTACGAACAGCCAACATTTTTGGTCTATTTTCTTCCTGCCACATGCGTTTTCTTGAAGAAGACAATCTCGCACCACGCATAATCTGGCCTGGGATTTCCCAAAAAGTTTCAATCTGCCTGTCATTCAGCTACAAGACAAGTACCAATTGTACTTGAAATGGTAATTTATCCTTGTTTTTCTTTCTAACAATCTGAAAACAACCAAAACAAAGAT…	TGCCGAAGTTTTCCTATAATGCAATGTTTCAAAAAAATCTTAACGATTTTAAAAAACATAAATAGATATATATATATAAACACACTTAAAGCTTACAATGTTCTGCGTAATACTATTGCGACTACTAAGCGTGCTTTCCTTTGGTCAACTTTTAAGTAGCGACTTTTTTCATAACATCAGTACATTTACGAACAGCCATACATTTTTGGTCTATTTTCTTCCTGCCACATGCGTTTTCTTGAAGAAGACAATCTCGCACCACGCATAATCTGGCCTGGGATTTCCCAGAAAGTTTCAATCTGCCTGTCATTCAGCTACAAGACAAGTACCAATTGTACTTGAAATGGGAATTTATCCTTGTTTTTCTTTCTAACAATCTGAAAACAACCAAAACAAAGA…
RPL22A	S_Bayanus	1.80332	0.0308987	CGTAGAGATTAATGCCGAAGTCTTCCTATAATGTAATGTTCTAAAAATTTGTTGATTCTATAAAAATATATATATACACACACGAATTTTACTGTTTTTTGCGTGATGCCATAGCTATTATCGAACAACTATGATAATAGCATTACTTTGTAGCGGCCCTCGACCAACATCAGTACATTTCTGGAACATCCATACATTTTCTGTAATTATTTTATTTTTTACGACTGTTTTTTAAAAAAAAGCATGCCGCGACGCATAATCTAGCTGAGGATTTCCAAAAGTTTCAAACTATTCTTTACCTACATTGGTATATGAGACTAGGATTTTGAAATCTAAACTTACTGACAAATTAAAAGATACCAAAACAACAGATTAAGAAACA	CGTAGAGATTAATGCCGAAGTCTTCCTATAATGTAATGTTCTAAAAATTTGTTGATTCTATAAAAATATATATATACACACACGAATTTTACTGTTTTTTGCGTGATGCCATAGCTATTATCGAACAACTATGATAATAGCATTACTTTGTAGCGGCCCTCGACCAACATCAGTACATTTCTGGAACATCCATACATTTTCTGTAATTATTTTATTTTTTACGACTGTTTTTTAAAAAAAAGCATGCCGCGACGCATAATCTAGCTGAGGATTTCCAAAAGTTTCAAACTATTCTTTACCTACATTGGTATATGAGACTAGGATTTTGAAATCTAAACTTACTGACAAATTAAAAGATACCAAAACAACAGATTAAGAAACA
RPL22B	S_Cerevisiae	1.42547	0	TGTTTAATCTTCTCTTTTAACTCTGCCTCTATTACGTTCGAGAAACCCTTCCACTATGCTTTCCAATCACTAATAGAATCACTAAAACTAACTGTACCAGCCAGTAAGGAAAATACGAAGCTATTCAAACTCGGAAACAAACTAGCGTATGGTATAATTCTCTATTAGTAGTACACACCCTTTCCTACTACCACGATAGGATCGTTTATTTGCACCGCATTTCCTTTCATATTCTTAAAGCATTAAGGTCGGCAAAATATCGAGACTGCTTTCTCCATGTCAACACCCGTACATATTCAGAGATAACACCCATAAATTATACAAAAAAGTTTCCAAACTTTTTTTTTAGACAACGCGAGCCGAATGGATGAATTTTTCAAGCAAAAAAGAGCTAATTAC…	TGTTTAATCTTCTCTTTTAACTCTGCCTCTATTACGTTCGAGAAACCCTTCCACTATGCTTTCCAATCACTAATAGAATCACTAAAACTAACTGTACCAGCCAGTAAGGAAAATACGAAGCTATTCAAACTCGGAAACAAACTAGCGTATGGTATAATTCTCTATTAGTAGTACACACCCTTTCCTACTACCACGATAGGATCGTTTATTTGCACCGCATTTCCTTTCATATTCTTAAAGCATTAAGGTCGGCAAAATATCGAGACTGCTTTCTCCATGTCAACACCCGTACATATTCAGAGATAACACCCATAAATTATACAAAAAAGTTTCCAAACTTTTTTTTTAGACAACGCGAGCCGAATGGATGAATTTTTCAAGCAAAAAAGAGCTAATTAC…
RPL22B	S_Paradoxus	1.50334	0.0883857	ACTTTAATCTTCTCTTTTCAACTTTGCCTTTATTGTTATGTTCGAGAAACCCTTCCACTATGCTTTCCAATCACTAATGAACCACTAAAACTAACTAACTGTGCCAGCCAGTAAGGAATATACAAAGTTATCCGAAGTTGGAAACAAACTCGCGTATAGTATAATTCTCTATCAGTACTGCACACCCTTTGCTATTACCACGATAGGATCGTTTATTTGCACCACATTTACTTTCATATTCCTAAAGCATTGAGGTCGACAAGTTTTCAGGACTATTTTCTACATATTAACACCCTAACATATTTACATGTATACCACCCATACATTTTATTCAATTTCTTGAACTTTTTTTTGTTTTTTTCCAGGACAGCGCGAGACTGACAGATTAATTTTTCAAAC…	ACTTTAATCTTCTCTTTTCAACTTTGCCTTTATTGTTCTGTTCGAGAAACCCTTCCACTATGCTTTCCAATCACTAATGAACCACTAAAACTAACTAACTGTGCCAGCCAGTAAGGAATATACAAAGTTATCCGAAGTTGGAAACAAACTCGCGTATAGTATAATTCTCTATCAGTACTGCACACCCTTTGCTATTACCACGATAGGATCGTTTATTTGCACCACATTTACTTTCATATTCCTAAATCATTGAGGTCGACAAGTTTTCAGGACTATTTTCTACATATTAACACCCTAACATATTTACATGTATACCACCCATACATTTTATTCAATTTCTTGAACTTTTTTTTGTTTTTTTCCAGGACAGCGCGAGACTGACAGATTAATTTTTCAAAC…
RPL22B	S_Bayanus	1.24267	0.0361362	TACTTTCCTTCTCTATCTTCAACCTTGCTTTATCTTGTTAAAAAAGCCCTTCCAATATGCTTTACAATCACTAAAAGAACTACCAACACTGTACCAGCCAGCAATCAATATACGCAGCGGCTACAGGTCCTTGAAAAGAAGCTTGCGTACGGTGTAATCCTCTAACAATGCTGCTTTATCTTCACAATTACCACGATAGGATCGTTTACTGCCAGCACATTTCCATTTTAACCTTTACCGTATTAAGGTCGGCCATTTACCGAGACTGCTCTTAAATTTTTACACCCCGACATCCTCAAAAACACGCCCATACATTATTAGTGTTTTTATTTTTATTTTTTAGATTTTTCTGACGACGCGGCGCGACGCGAAATATTTTTGCAAAATCAAAAAGATAAT…	TACTTTCCTTCTCTATCTTCAACCTTGCTTTATCTTGTTAAAAAAGCCCTTCCAATATGCTTTACAATCACTAAAAGAACTACCAACACTGTACCAGCCAGCAATCAATATACGCAGCGGCTACAGGTCCTTGAAAAGAAGCTTGCGTACGGTGTAATCCTCTAACAATGCTGCTTTATCTTCACAATTACCACGATAGGATCGTTTACTGCCAGCACATTTCCATTTTAACCTTTACCGTATTAAGGTCGGCCATTTACCGAGACTGCTCTTAAATTTTTACACCCCGACATCCTCAAAAACACGCCCATACATTATTAGTGTTTTTATTTTTATTTTTTAGATTTTTCTGACGACGCGGCGCGACGCGAAATATTTTTGCAAAATCAAAAAGATAAT…
RPL23	S_Kluyveri	1.32777	0	CCTTCTTGAATAAATATTAGTACCTAGAGGTTCTTGTATCGCTTAGGGTGTTGGGAGATCTAGTAACGTTTACTCTAGTGGTTTACTCCCCCGTCTCTAAACTCCTGCATATACTGAAAGCCCTATATATCAACTCTCCTGAAGTTTAGGGCATCAAATTTAATTCGTGACTATTTAAGTAATTTGCATCCGTACATTTGTTATATTCGTTGCATAGTGTATACCCTTACACCGCGTACTTAAATATCTTATTTGCTTTTTTCAAAAAAGCTGGGGCGCCCCGACGCAACACCGAGGATGAGAGTAGCATGCCACTTCACCCTACTGCTCTGCTCCCCTCTGCATAGTGATTTTCTTCGACATATCCTCTTTAACATAGGTCCAAAGTGATTATTAACA…	-
RPL23	K_Lactis	1.00514	0.0125776	TCCAAGTTGATTTATTTGTAAGAACACTTAATACAGTCTGGACATTAACTACCCTTATTAATACGCCGATGACTCTCTTCAGGTAAAGAGTAAAAAAGTATCAGAAGTATGGATTTAAACTTAAAAAAAAAGGCACTGAGTATACCAGTGGTAGTGAGATATGGCCAAATTTATAGTATGATAGAATTTTCTATACTTCAGAAACCCGTTGGATCATTCGTCTAATGATTTTAAGTCTTTGGTAGCTGAATTTTTGATGTGTATGATTCCAAATGTCTCTAACCTCAATGGAATATTTTGGTTCTTGATTGCTTATATTGAACACAGAGGGAAACCATAGGTGTGACTGTCCTAACTCTTTCCTTTTTCATTCGGACCCATACACCAGTACACCATATG…	-
RPL23A	S_Cerevisiae	0.865117	0.015782	AATATTTGTATTGTTTTATGTAATTATAATCTTAAGCTTGCAATACCAATCACTATTACCATGTTAATGATCCCCCAGATAAAAAGACAAGACAGAGCATATATCAGACTACATTAACATCTGTACACCCCCAACTGCTTTGAAAAAACCCATGCAGTTATTATTTTCAACAGACCAAGTTTTTTTATCGCTTATCCGGCTCACAGAACGAGCCGTACAACCGTCATCAGACTTGCATGGAAATGTTGAAAAAGAGGTAAAAAAGAAAATATCAAACCCAAACACGCTCGGGCTGAAAAATTAATATGGCAGGAAACGAACTGTAGCCATAATGTACCTGTTCCCGCTAATAGTAATACCATCGTATTGCTAAGGTTAGTAGCTAAAAATCTCTTACTT…	AATATTTGTATTGTTTTATGTAATTATAATCTTAAGCTTGCAATACCAATCACTATTACCATGTTAATGATCCCCCAGATAAAAAGACAAGACAGAGCATATATCAGACTACATTAACATCTGTACACCCCCAACTGCTTTGAAAAACCCATGCAGTTATTATTTTCAACAGACCAAGTTTTTTTATCGCTTATCCGGCTCACAGAACGAGCCGTACAACCGTCATCAGACTTGCATGGAAATGTTGAAAAAGAGGTAAAAAAGAAAATATCAAACCCAAACACGCTCGGGCTGAAAAATTAATATGGCAGGAAACGAACTGTAGCCATAATGTACCTGTTCCCGCTAATAGTAATACCATCGTATTGCTAAGGTTAGTAGCTAAAAATCTCTTACTTT…
RPL23A	S_Paradoxus	0.971114	0.025397	ATATTTGTATTGTTTTATATAAATGTAATCCTAAGCTTGCAATCGCAATTACTATTACCATATCATGATATACCTCAGATAAAAAATAAGATAATAGAGCATAGAACAGACGACTTTAACACCGGTACACCATATGAAAAATGCCCTTAAAAACCCATGCAGTTTATTTTAATAAAGACCAAATTTGTGGTGGCTTATCCCGCTTTTATAGAAATTGCCGTACAACCATTAGCAGTCTTGCATAGAAATGTTGAAAAAGAGATAAAAAAAGAAAATATCAAACCCAAACACGCTCGGGCTGAAAAATTAATTTGGCCGGATACGAACTGTAGCCATAATGTACCTGTTTCCCGCTAATAGCAACTATCATATTGCTAAGGTTGTAATTGATTTAGTAGC…	-
RPL23A	S_Mikatae	1.06132	0.0153497	ACTTTTATATTTTTTATTAGATGGTAATCAAAACTTGCAGTATTGAATTTAATTATTTCAATAGTATCTCCAAATAAAAGGTAGAATATAACTGACGACTTTAACACCAGTACATCATGTATTGTGAGAATTTTCTTAAAAACACCCATGCAGTTTCATTTTAGTAAAAACAAAATTCCTTGCTCATCATTTCTCTTTGACAGAAACCGCCGTACAACAGGAATGAGGCTTGCATAGGGATGTTGAAAAGACAAAAAGAAAGAAAGCATCAACCCAAACACGCTCGGGTTGAAAAATTTAATATGAGCCTAATACGTGCTGTAGCCATTATGTACCAGCTCCCGCTCACAACAATATTGTCATAATGCTATGGTCATATTTGATATAGTAGCTTAAAGC…	-
RPL23A	S_Bayanus	1.00032	0.0201976	GTGTATGTACTCAATAAATATATTCATAGGTCTCAAACTTGCAAAACAAAAAAACTATGTCAGCATTAACCCCAGCTTAAATGGAGAGTATGTGACGACTTTACGCCGGTACACCATATTTGCCCTTCATAATAATATTTTGTTAAAACCCATGCAATTCCCACTAGATTAAAACCAAGTGTTTTGGTTGCCCGCCTGGCTGTAACAGAAACCGTCGTACAACAACTTCGAAAAATCCAGAAAAAATGTGAAAAAAGAGAAAAAAGGAAGTTTCAAACCCAAACACGCCCAGGCTGAAAAATTTATTATGGCCTAATACGAACCGTAGCCATTATGTGCCAGTTCCGTTAATAGCAATATTACTATAGTGCTTAAGCTATAAGCTAAAAACCTCTTGCT…	-
RPL23B	S_Cerevisiae	1.67347	0.025255	TCGTTTGTTACTTGGCCGCCCCTTTATATTGACTCAGTAGGGGAAAAAGTACTGTTGATCGAAGAAAGAAAGTTGTTCCTACTAATCTTCCGCATGCTCTAATATCTGACATATTATCCCTTCTCTTCTGTAATTTCCTAAAATACAAATAGATGTAGAAAACAGTTCTTTCTTTCCCTGTTGTATACATCCGTACACTTTTGTGAACCCAAACATTTTTTGTTTAATTTGAAAGATTTTTTTCTATTAGGAGCCGTCTCCTTCAATTCTCGGCAAAGCGAGGGTTCCTCTCATGCTTACTGTTCTCTTCCCCACCGGCAGCTGCTGGGAACCCTCCAACATGCTGTGCACGGGGGAGGGACAGTAGCTAACTACCTTTCACTTGGGCGGGAAACTGAA…	TCGTTTGTTACTTGGCCGCCCCTTTATATTGACTCAGTAGGGGAAAAAGTACTGTTGATCGAAGAAAGAAAGTTGTTCCTACTAATCTTCCGCATGCTCTAATATCTGACATATTATCCCTTCTCTTCTGTAATTTCCTAAAATACAAATAGATGTAGAAAACAGTTCTTTCTTTCCCTGTTGTATACATCCGTACACTTTTGTGAACCCAAACATTTTTTGTTTAATTTGAAAGATTTTTTTCTATTAGGAGCCGTCTCCTTCAATTCTCGGCAAAGCGAGGGTTCCTCTCATGCTTACTGTTCTCTTCCCCACCGGCAGCTGCTGGGAACCCTCCAACATGCTGTGCACGGGGGAGGGACAGTAGCTAACTACCTTTCACTTGGGCGGGAAACTGAA…
RPL23B	S_Paradoxus	1.68893	0.0368259	TCGTTTGTTGCTTAACTGGCTTTTATTTTGGCTCGATAGGAAAAGAGGTATGGTTAATGGAAGAAAAAATGTTGTGCTTAGCAATTTTCCAAGTACTCTGATTTCCTGACATATTATCTCTTCTCTCCTGTAATTTCCTAAATACGAATATGTGTAGAAAACAGTTCTTTTCTTCCCATTGTATACATCCGTACATTATTGTAGAACCCAAATCTTTTTCATTCTGTTTTTTGAAAGACTTTTTTTTTTCAACGAGATACCGCCCTCTTCAACCATGAGCAAGGCGAGAGCACCTTCTGCTTACGCTTCTTTTTCCCTGCCGGAAGCTACTGAGTCTCCTCTGGTACGCTGGGCGCAGGCAGAGACAGTAACTAACGATCTTTCACTTGGGTGGGAAAG…	-
RPL23B	S_Mikatae	1.60656	0.030845	TTGTTTATTGTTTAATTAGATTTTATCTTGGTTAGGCAGTAAAAAAAAGTACGGTAAAATGAAATTAAGCACGCTGTACCTAGTCTTTTCTGATACTTCAATACTTGACATATTTTCTCTTCTCTTCTGGAATTTCCTACAACATAGGCGTTGGAAGTAGTTTCCTTGTTTTAAGTACACATCCGTACATTTATTATTCACCCATACCTTGTCTTATTTTTTTTTCACATGACTGTTTTTCTCATCAAATGCGCCGCTTCCAATTTTGAGCAGGGAGAAGCTCTCCTCCGCTTATTCTTCTCTTCTTTGCTAGGATCTCTTGAGCTCGGAAGGGATGGATTTGCTAGTAATCTTTTCTTTGGGCAGGAAAGCTAGACCAAATACGGAGCCGGCCAGGCT…	-
RPL23B	S_Bayanus	1.98394	0.0443496	TTGTTGATTGTTTCCCTAATTCTTCTTAACCTTACAAGAAAAGGGATGTAAACAAAAAATTGAAAAGGCAAGTATAGGTCTAGTGCTTTCTAACACTTTGATGCAATAAACTATTTTCCTTTCGCCTGTGAAACTCTCTATTACTAAGTAAACGAGAATTAAAGGTTGCTTTTTTGCTTGGATATTACACCCGTACGTTTCCTCTTTTTACACCCATGCCTTTTTTTGTTTCTGCTCTTCTTTTCAAAAAATATTTTTTCCAATGGAGGAATGCGAATTCGCTTTTCTGCCCTCAGCGTGCCCGCGGCTCCCCTCTGCCGCCGGCTAGTCAATTCCATTGGCATCCTTGGTACTGTTAGAGGGAGTGTTGCCGGTAGTCTCTTTTCTGGGCAGAGAGGC…	-
RPL24	S_Kluyveri	1.09358	0.0307957	CAGTCAAAATGATACAAACACCCATATACCACGCTTTATAACTGTGACAAATGATGGGAGGTTTTCTTTTCGTACGAAATGTCCACCTGAAAGGAGTAAGCCTCCGCCATGGAGGTCCCCTCTCTGAGCCTATGTGCGTGGGGTCGATGCAGCTTGCGTCCCTCTTGCTCTCTCTCCTCCTGTGCTGCCCCAACGCCGCCCACCGTGAGCCTACGGAGACCCATGGGCGTAGGCCGAGCCTGGACTGGTACCGTGTCTGTCTGGCCCACGCCAGGTGGGGATGGCACTAGCCAGTGGCGAGCGCAGCGCTACGCGGGCTGACCGCCGGTGCGCAGCGTAGGCAGACAGACACGGTACCAGTCCAGGCTCGGCCTACACCCACGGTCTCGGTCTCGCCAA…	-
RPL24	K_Lactis	1.05655	0.0248215	CTGTTTTCGTAACGAACAGAAAGTGGTGTACGGATGTAAACTTTGAATTTGCTTTGAAAACGGCGCGAATTACTGTATTAGGAAATGCATATTCTCACTTTTTTCCAATTTCAGTTCTTCCTGAGGGAAGGCTGCCTGGACAGGGGCAGTTCCCTCTGTCTGGCTAGCTTTCCAGCAAGGCCTCCCATTGGATCCACCCTCTAGGATGCTGGGAGAGGATTCCTAGGCAGACAGTCATACACTTCCCTCAGCAGCAATCCCACTCTGAACCAGACTCTCCAGCTCACGTCCCACCTGGCCACAGTGCTCCAATGGTCTGCTCATGCGCTGGACTCTGGACAGGAATGGTCCTGAGCCTAGGCTCAGAGCTAGGACCTGTTCCAGGCAGCTTGGCCTGTC…	-
RPL24A	S_Paradoxus	1.2007	0.0231444	ATGGAAGAATGATTAGGATAAGATTACGCCAGCGTGGTTACGCTCTATCGCCCAGCGTGAGTATTGCCATTCCGTCTCTAATGGCAAAAAAAAAAATGAAAAAAAAAATATGGAAGGCGGCCCTAGCCGAAAAAAAGGAGGATTTTCCGCGGAACACCTATCCATCCATACATTTTGTAATTTTACATCCGATCACCACATATACTTAAGCCGGAATATGCCATTTTTTTTTCGTTTTGTCTAACTTGAAGTTTTTATTCCCGTCCACGAACAGGGGATCCTTACTGTGGTGCTAGACAGGAGTTCAGTTACTCCAGGCGGAACGAAACGAAAGTAGACGGACTGAGCTGTCTGGCTGGCAAGGAAAGGAGGAGAGGGCACACAGACAGGCGGTTGGAG…	-
RPL24A	S_Mikatae	1.28526	0.0459641	CTGGAAAAAAATGGTTAAGATAAGATTCCGCATAGTGTGGGTACGCTCTATCGCAAGCGCGAGCACTGCCATTCTGTCTCTAATGAGGAAAAAATGGAAAAAAAAAAAGATACAAAAGCGAGCCACGTAAAAAAAAAAAAGGTTTTGTCGATGAATATACATACATCCGTACATGTTTTGAAATTACATCCGATAACCACATACTTAAAATTAAGATTTTGCCAACTTTTTTCGTCTAGATCAAGTTTTTTTTGTTACTTTCATCAATGAGCCGGTGGAAGTTCTTAGTCTTGGTAGAGTGGACAGGAGCCCAATATACCCAGGCAGAACGAGGGGAGAGTAGGCAGGCGGACGGAGCTGTTTTGTCGACATGGCAGGGAGAGGGAGCACACGGGCAGA…	-
RPL24A	S_Bayanus	1.23363	0.0163372	ATGGAAGATACCGCCTACGATGAATTGCGCCAGCGTGGTTGTGCTCAATCACCGGCGGGATATGCCTTTCCCTCTTGAACGGGAAAAAAAAACTGGAAAAAAAACGCAAACCGACTCTGCGAAAAATTGAATATTTCTTCCTATTTGTGGTCTCCATCCGTGCATTTTATCTTGTAACACCAGTTCACCACATACTTATTACTGAGAAAGGTTCCCGTTTTTCAATGCCGGATTGGAATCTCCATTATCAGTCCGCGAACTAGGAAGTCTCACCGCCGTGGCGAGCTGAAGTGCACCATCTCTAGGCAGAGCCAGGCAGAGCCTGATGGCAGGACAGTCCGCCTGGCACGAGCAGAGATGACGGCCGCACTGACGGACAGAGAGTTCTGTCCAGCAGGA…	-
RPL24B	S_Paradoxus	0.831431	0.0237087	AAACCGAGATACAGCCATACGTAATTCCGTGCGGTAACACGCTGATCTGAAGAAGCTTCCGCCGGATAAAGCACAACATTCAAGGTATATATGTGTGCGTGTTTCCTTCTATGCGTGTAAATGTATCAGTGTGTGAATGTGTGTAAAACGTTTATGGTTAAGCCTGTTCAGAACTCTCATTGACATTAACGTTAACAGGATTTTCTATCTAAAAGAATGAGTATCTTGTTACGTAAAACTTTGCCGAATAATATTTCATACTACATCCGTGCATACTGGATAAACACCCAGTCCTTACTTTTTTAGCTTGAAAAGCTTCATTCTCTGTATTGCGGCAATTAGGACTTCCGCGTTGTTAAGCGCTCTGCGCTTACGGGAAGGTCCCCTTCTATTGAGCCT…	-
RPL24B	S_Mikatae	0.957959	0.0155333	AAACAGAGATATAGTCATAAGCAATATAATCCGCTAATAAGTTTTGCCTGAATCAAGATTTTTGCCGAACAAAGCGCCTTTTTCTAGCCAAATATATTTAAATATACATCTATATATACCTATGTATGCGCATATGAATAAACCTATCTAGAGGTATCAAAGATATAGTGTTAACAGAATTTCTTTTGAAAAGAATTGCATTACTCATTACATCAAAATTGCCGAATCACGTATTATTACATCCGTACATATTACCAACAACCCAGTCATTATTTTTAACAGTTTGATTGTCCGCATTGCGGTAATATAGACTTCCGAGTCGTTAAGCGGGCTACACCTACTGAGAAATCCTTCTCACAGGTTGTCGGCCTCGGAGCGGCAAGTGTAGCACTTTGCTGC…	-
RPL24B	S_Bayanus	1.04898	0.0321863	AGATCGGGATATAGCTATACGTAATACAATGGCCAAAACACTTGGCCTAAAAACGAGCTCTACTGATAACAAACGTGGGGTTTATACGGGGTGGTCTACATGCGTTTATAAATATATGTACATATACAAACTTGAACATTCCCATTGAAACTCAGCTTAGTATACACGTATGTCCTGACCATAAGATTTACATGACAAATTGAAGGAAAATTACAGATATTATTGTTATAACATCCGTGCATACCAGAGTTAAACCCATCCATTCCTTTATTGATTTTTTTCAGTTTGTTCAAGCATTTCGATGATGGGCCCTAGAAAAAGCGCGTTGCTAGCCGCGCTCTCTCTAGAGGGAGACCCCCTTACTGCAGGCAGGGCCTAGTACTGATTACTGTAGCACTT…	-
RPL25	S_Cerevisiae	2.21671	0.0393562	AGGTATGTTAGTGCTAAAAGCAAAATGTATGTAGTATTTTCTTTTTTTTTGTTTGTTTTTTAGTGTCCTCATCGATGTACGTACTGTATCAACACAACGAAGAACGACACCTCTTTATAAACCCTAAGCTTGCTATTTGAGAGCAAGAGATCTTTACGTAAACAGATAGGGTCACACAGACTATACGAAAACCTGTCAATATAATCTATTCGGATAAGATTATCAACCCCTCCCTGCAAGATTTTTTATTGTTATTATTACAGTTTTTAAACTGGTAGCAGAGCTATCCGGTAAACATGTACTAATCAGTCTAACACCCCGGAGGAGGCTTATCATTACATATTCTTGTCTCGGCGTTCTTTAAGTTTCTTATCTTGTATGCCCGATATAGCAACCTTG…	AGGTATGTTAGTGCTAAAAGCAAAATGTATGTAGTATTTTCTTTTTTTTTGTTTGTTTTTTAGTGTCCTCATCGATGTACGTACTGTATCAACACAACGAAGAACGACACCTCTTTATAAACCCTAAGCTTGCTATTTGAGAGCAAGAGATCTTTACGTAAACAGATAGGGTCACACAGACTATACGAAAACCTGTCAATATAATCTATTCGGATAAGATTATCAACCCCTCCCTGCAAGATTTTTTATTGTTATTATTACAGTTTTTAAACTGGTAGCAGAGCTATCCGGTAAACATGTACTAATCAGTCTAACACCCCGGAGGAGGCTTATCATTACATATTCTTGTCTCGGCGTTCTTTAAGTTTCTTATCTTGTATGCCCGATATAGCAACCTTG…
RPL25	S_Paradoxus	2.08882	0.042874	TTGTATGTTAGTAGTAAAAGCAAGTTGTATGTGGTGTTTTTTTTTTTGTTTGTTTTTTAGTTTCCTCATCGATGTATGTACAGTGTCAACACAATGAAGAATGACACCTCTTTATAAATCCTAGGCTCAAAATGTGAAAGCAGAAGATCTTTACGTAAACAAATAGGGTCACTCAAACTATACGAAACCTGTCAATATAATCTATTCCGATAGGATCATATTAATCCCTCCCTTCAAGAAATTTATTATTGTTACAGCTTTTTAACTGTCAGCAGAGCTATCTGATAAACATGTACTAATCAGCCTAACTAACCCCCTGGGGGAAGCTTATCATTACATATTCTTGTCTCGGCGTTCTTTGAGTTTCTTATCTTGTATGCCCGATATAGCAACCTTGTT…	TTGTATGTTAGTAGTAAAAGCAAGTTGTATGTGGTGTTTTTTTTTTTGTTTGTTTTTTAGTTTCCTCATCGATGTATGTACAGTGTCAACACAATGAAGAATGACACCTCTTTATAAATCCTAGGCTCAAAATGTGAAAGCAGAAGATCTTTACGTAAACAAATAGGGTCACTCAAACTATACGAAACCTGTCAATATAATCTATTCCGATAGGATCATATTAATCCCTCCCTTCAAGAAATTTATTATTGTTACAGCTTTTTAACTGTCAGCAGAGCTATCTGATAAACATGTACTAATCAGCCTAACTAACCCCCTGGGGGAAGCTTATCATTACATATTCTTGTCTCGGCGTTCTTTGAGTTTCTTATCTTGTATGCCCGATATAGCAACCTTGTT…
RPL25	S_Mikatae	2.10702	0.0390203	TTGTATTTTCGTATTAAAAGCAACAAGTATGTAGTTTTTTTTTTTGTTGATTTTCTAGTTTCCTCATTAATGTATTTACTGCGTTAGCAAAATGAAGAATGAACACCTCTTTATAAACGCTTAGGTCACGGACACAAGTATTAACCGCGATGTGTAATTGAAAGATCTTTACGTGAGCAGATGCCGTCACTCAAACTATACGAAACTTGTCAATACGATCTGATCTGGTAAGATCATTAATCCCTCCTTACAAGAATCTTTTATTGTTAAAGCTTCTTTAAACTGTTACGCAGTATCATCCAGTAAACATATACTAAGCAGCCTAACAACCCCTAAGTGAACCTTATCGTTACGTATTCTTGTCTCCGTATTCTTTAAGTTTCTTATCTGGTATCACCG…	TTGTATTTTCGTATTAAAAGCAACAAGTATGTAGTTTTTTTTTTTGTTGATTTTCTAGTTTCCTCATTAATGTATTTACTGCGTTAGCAAAATGAAGAATGAACACCTCTTTATAAACGCTTAGGTCACGGACACAAGTATTAACCGCGATGTGTAATTGAAAGATCTTTACGTGAGCAGATGCCGTCACTCAAACTATACGAAACTTGTCAATACGATCTGATCTGGTAAGATCATTAATCCCTCCTTACAAGAATCTTTTATTGTTAAAGCTTCTTTAAACTGTTACGCAGTATCATCCAGTAAACATATACTAAGCAGCCTAACAACCCCTAAGTGAACCTTATCGTTACGTATTCTTGTCTCCGTATTCTTTAAGTTTCTTATCTGGTATCACCG…
RPL25	S_Bayanus	2.04431	0.0460872	TTGTAAGCAAGTACCACAAGCAAGTAAGTAAATGAGATCCAGTTTTTTTTGTTGTTTTTTTTTGGTTTCCTGATCGCTATATTTACTATGTTTGTACAGTAAAGGATGAAACCTCTTTATACACCCTAAAGTTATGGGCACAAGTCTCGCGGGGATGCACAGGTAATAGGTCTTTACAAAACCCTTGCTTACAATGTACATGAAACTTGTCGATAAAGTTTGATAAGTTCATTAACCCCTCCCTACAAGATATCTATTGTTACGACCTTTGACCGTTACGGAGTCTTATCAAGTAAACAAATACTAAGCAGCCTAAGCACCCCTAATTAACCTTATCATGATGTATCATTCTTTCGGAATTCCTTGGCCTTCTTATCTTCCCTTTCCGATACAGCAACC…	TTGTAAGCAAGTACCACAAGCAAGTAAGTAAATGAGATCCAGTTTTTTTTGTTGTTTTTTTTTGGTTTCCTGATCGCTATATTTACTATGTTTGTACAGTAAAGGATGAAACCTCTTTATACACCCTAAAGTTATGGGCACAAGTCTCGCGGGGATGCACAGGTAATAGGTCTTTACAAAACCCTTGCTTACAATGTACATGAAACTTGTCGATAAAGTTTGATAAGTTCATTAACCCCTCCCTACAAGATATCTATTGTTACGACCTTTGACCGTTACGGAGTCTTATCAAGTAAACAAATACTAAGCAGCCTAAGCACCCCTAATTAACCTTATCATGATGTATCATTCTTTCGGAATTCCTTGGCCTTCTTATCTTCCCTTTCCGATACAGCAACC…
RPL25	S_Kluyveri	1.23534	0.0276967	AGGGGAAAAGAATTTCACAGCATCTGGATGCAAGAACCACAAGCCATCATGTTTTTTTTCCTCTCCAGTTCTCGAATAAGTTGCATTTATATCCCGAGGCTTTTGTAAATATATACATACACATCACATTGCAATCATGTACATAAGTGAACAGTGGATTTTTCCATTTTTTTAGTAAAACCCTGTTGCTGTACTAAAACAGCTTGTTCTAAGTTGCACTCGAGCACTGTGGTCACATTTTTAAGACTCTCTAAAAATGTGATTAGGCCTTGAAGAGACAAGCGAGAGTATTTAACGGTATACTTGCAAATTGTCAATGAGATACATTAACTTAACCTTTCCTTTTCTGAGTTGTTTTAAATTTAATGAGCTCTCAAATGTCAGTGACTGCGTTTGGAT…	-
RPL25	K_Lactis	0.573918	0.00656981	TTCGGTCTCTCACCATTTCATCTTTCACTAATAGTCTCTGTGTATAGACATGAATTTGGAAAATAATTCGGTATAATAACAAATAATGCATGTATATAAATTTAACGTAACGCACCAGAATTTTCGTTTAAATACATTAAGACAGCAATTCGAAGTATGATTTCACACAATTATGACATTGCTCATGCCTTATAATCTCTGGATGCTAATTTCATCGAAGATTTAAAATTTTCCGGAAAGTAGCGGGACTGTTTTGTGGATGCACGGATTTGGCTTTAGATTTTTTGTAAAAATTGTTAGGTATTTTAGTATTCCATTTTAGGTAATTAAAATTTCAATTGGAGGTTCTAAAAAAAGGAAAGGCAGAGGAGGCGTTCCGGCTGCCAGGTTCTCACCGTT…	-
RPL26	S_Kluyveri	1.57734	0.0293335	AACTGATAATCTTTGGTTAAACTCCTAACTGGCTGATGACATATTTCTGTCAATGCATTTGGAAAATTTTCCCCTTTAAGAGGTATACACTTGAAATCTTGGGAGAAAGCGCATAGTTCTTGGACAATATAGGACTGTTACAGAGCTATCATAAGTAGATCGCTCTTTAGTGCCCCTTTAGTGCAATGGTTAGCATACATTTTTCCGGTGGATGTGATCCGGGTTCGAGTCCCGGGAGGGGCTTTTAGATCTTAGACGTTGATAGACTTATTGTGCTACCAAAGTTATTTTTTTATCAATGTTGTCTCTCTCTCAAGAGGGTAAAGGTTATGGTTATTGGATTTACCAATTGAAGAAGCTGTCAGACTTTAAGGTAATTGTTATTGGTCGTCTATAGTT…	-
RPL26	K_Lactis	1.08621	0.0482436	ATGTTGTTATTACGGATAATGGTAGAAGCAAGTTAATGGCATGCAAACAGGAAACCGTTTATTTTACATAAATATACTATTTGAAATTAATCAATCCTCATGGTATACAGAGTTAGTGAACAAAAGCAAATAAGTGCTTTTTACAGCCCCTTTAGTGCAATGGTTAGCATACATTTTTCCGGTGGATGTGATCCGGGTTCGAGTCCCGGGAGGGGCTCCTCTGATTTTTGTTCAAAATTTGAATTCATACTACGTGCCGATTCATTCAAATTCCTTTATAATACTTGAACCATCAATGGTGTTCAGGCCCAATGCCTACATTTTTTTTTGTACAAACTCAACCAATGGAGGCTAATATTTATTAGCAATTGTTAACAACTACTATATACTGCTGTTCTT…	-
RPL26A	S_Cerevisiae	2.3298	0.094157	ACGGAGGCTACGATGCCAGCACAGTGTCTATAAAGTCAAGAAATACATTCAAACTCTTCGCGTAAGGGCTGTCAATTTTTCATTTCCCTCAAAGTTAATGCGCAAGAGTTAGGATGATCTTGATTATTAGTTATTTGTTTGTTCCATCAATTATGCCGACGTCCATGAATGCTATTGAAGTATCGATTACTTATGCTATTCTATTGTATTTGAGCCGGCGGCTAGTAAACAAGACAGCATACCTTTCCAACATCCGTACATATTGATTATTGTATCTATGATTTTCATGTAATGTATGGGTTAACTAATCCTTTCTCTTCTTTTTTTTTTTTCTGAAAATCAGTAGCTAGAGGAACCTGTTCGTGAAAGATATGGAATATTCCGTCTAGGGAAGAGCCG…	ACGGAGGCTACGATGCCAGCACAGTGTCTATAAAGTCAAGAAATACATTCAAACTCTTCGCGTAAGGGCTGTCAATTTTTCATTTCCCTCAAAGTTAATGCGCAAGAGTTAGGATGATCTTGATTATTAGTTATTTGTTTGTTCCATCAATTATGCCGACGTCCATGAATGCTATTGAAGTATCGATTACTTATGCTATTCTATTGTATTTGAGCCGGCGGCTAGTAAACAAGACAGCATACCTTTCCAACATCCGTACATATTGATTATTGTATCTATGATTTTCATGTAATGTATGGGTTAACTAATCCTTTCTCTTCTTTTTTTTTTTTCTGAAAATCAGTAGCTAGAGGAACCTGTTCGTGAAAGATATGGAATATTCCGTCTAGGGAAGAGCCG…
RPL27	S_Kluyveri	1.07988	0.0441548	TTTATCTGTGATTTATTCTGCCAGCATAAAGGCCAGCACTCGATTATGAAACGATAGCTTCATTATATCAAGATTTATTTCTCTATAAACAAAAAGTCCAAAATAGGGCGGCAAGGATCGCGAACACATGTTATCAGATCGTATGACTGCTATGTAAACATCCGTACATTATTCCGTGTATAGTTACTTCATATACATATTCCGTAAACCACACTTAAATATTATTTTTTTCAATGATTCTCATTATGGCCCATGCACCACATATAATTATAGATGAAAAGCCTTTTTTTTTAAGCTGGAAAATATATTGAAGACCAGACCATGATGACGCAAGAAGATGAGGTAGGCGAACTACGGGCGGTATGCTACGCGGTTACGGTCCCAGCCTAGCTCCTCTGA…	-
RPL27	K_Lactis	1.61505	0.0273272	TGGTAAAATGTGTCAAGGGACAGCAACTTCAGTTGACCAGTAAAGAAAGTTTTAAATAAAAACAAACTTAAGTGATAGAATATTGTGTTTACTACAAATACCAAACACCCCTGCTCCTATCAAGGCTTGGTGTGCCCTAAGTTATCTTTATAAGGCCAGTAGTACTTCCTATTTGATCCGTACTTTCAGTTCATTGGTTTTTTATTTACATTTCGAAATCTCATCCTGTTGACATTTCGAGAAGTCGAAAATATGGGACTGCTATACACCCATACATAAATCATAACATACGTACATTATAAGATTTTATTGCAAGTGAAAAATAAACACATCCGAAAATGGAAACTAGAGTCACTTCTCTCAGCCTTTGCAACATTCTACTGCGGCTTCGCAAGGTCT…	-
RPL27A	S_Cerevisiae	1.75098	0.044787	ACACTATTCCTTCTGTTGCTTGGTTAAAATGCTATTGATACTTAGATGGTGTATTGGAGAGCACGAAAATCTTTTGCTGAGTGACTTGAACTATCAAACAGAATTACTTGTTGGCTGATTTTTTTTAAGTCTTGATTTAACAATAGAAAAAAAAAAAAAAAAAAAAGGAACAATATAACTTTTGTAGTACGTGTGCCAGGTTACAGATATGGTTTCACTTCTATGTCGTGCTTTTTTCATTCATACGTAATCTTATGCATGTAGGGGATAGACGCACAAAAGCACCAAGGCTGCATGTATTGATAAATTGGCTTACACGATTCCAGCTAAGGGGACTCGGACGGAACCGTCTCATATTATACGTTCAGTGAATATTTTTCACGGAAGAATGGAAAGGGC…	ACACTATTCCTTCTGTTGTTTGGTTAAAATGCTATTGATACTTAGATGGTGTATTGGAGAGCACGAAAATCTTTTGCTGAGTGACTTGAACTATCAAACAGAATTACTTGTTGGCTGATTTTTTTTAAGTCTTGATTTAACAATAGAAAAAAAAAAAAAAAAAAAAGGAACAATATAACTTTTGTAGTACGTGTGCCAGGTTACAGATATGGTTTCACTTCTATGTCGTGCTTTTTTCATTCATACGTAATCTTATGCATGTAGGGGATAGACGCACAAAAGCACCAAGGCTGCATGTATTGATAAATTGGCTTACACGATTCCAGCTAAGGGGACTCGGACGGAACCGTCTCATATTATACGTTCAGTGAATATTTTTCACGGAAGAATGGAAAGGGC…
RPL27A	S_Paradoxus	1.67747	0.0208178	ATTCTACTCCTTTGCTGCTTCGCTAAAATGTTATTGATACTTAAACGGTGTATTAGGGAGCACGAAAGTCTCTTGCTGAGTGATTCGCACTGTTAGATAGAATTATTGGTTGGCTGTTTTTTTTTTTTTAAGTCTTGATTTAACAATAGAAAAAAAAAGATCAAAAAACTTGTCTTAGTACGTACGCCAGGTTATGAATATAGTGTCGCTTCTATGTCGTGCTTTTTTCATTCATACGCAACTTCATGCACATAGGGGATAGACGCATAAAAGCAGTAAGGCTATATGTATTGATAAATTGGCTTTCACAATTCCTGCTAAGGGGACTCGGACGGAACCGGGCTCATATTATACGTTCAATCAATATTTTTTCACGGAAAAATGGAGACCGCTCCGGAA…	-
RPL27A	S_Mikatae	1.63117	0.042565	TTAGAGAATCTTTATTTTGTTGTTTCACTAAAACGCTATTGAATAACCTAATACTGTATCAGGAGGAGCGCAAAAAATCTCTTAGTGAGTGATTCGCACTATTTAAGAAATTCAGTTGTTGACTAATTTTTTCAAGTCTTATTTTAACAACGGAAGAAATTAAATAAAAAAAAACTTTTCTTGTAAGTAAAGTATGCCAGGTTATGGATATAGTGTCGCTTCTATGCCGTGCTTTTTTTCGAATATAAGCAACTTACATGCACGTAGGGGATAGACGCAGGAAAGCACTAAAGCTATAAGTATCAATAAATTGGCCTACACGGTTTCAGCCAAGGTAAGGGGACTCGGACGGAATCGGGCTCATATTATACGTTCAGTGGATATTTTCAACGGAACGAT…	-
RPL27A	S_Bayanus	1.77519	0.0430464	AAACTATTTTTCTTTTCACGTAAAACGTTATGATATCAGCAGTATACCAGTTAATGATGGAGCAAAAATATCAGACTGATTTCACACTGTTTAAGAGCACCAGTGGTTGGCTTTTTTTTTCCAAGCTTTAATATAGCAGCAGGAAAAAGAATAAAAAAACTTTTCCTTAGTTTGTACGCCTGGTGTTGGGTATAGTGTCGCGTTTACAGCGAGCCTTTTCCTTCAACCGAACATACCTCCACGTAAGGGATAAACGCATGAAAGCACGAATGCTATACGTTCTTATGAATTGGCCTACAGTCCGAGCTAAGGGGAAGAGAACCGGACTCGTCCTCACATTGTACGTCTGGTGGAGATTTTTCATCGGAGAAGTGGAAACCGTTTTTCCGCGAGACGATG…	-
RPL27B	S_Cerevisiae	1.30716	0.004892	TGGGGGGTTGAGTTAAACCTATACTATTGGAAACCAAAAATCGGCAGAGAATTAAGGCAAATCAATTAAAATTCCTTTTCTCTCTACCTTTGCTAATATTAAAAACCATAGTTGTAAAGGGTACTTAATGCTATATTCCTGTTAAGTTTCCTATTTCACCTTGTTTTTTCCAATTCTTACCAATTTGAAGACTATGTTTTTAAACACCCAATCATTTTCCACCCACACATATATTACCCTTTTTTTGGGTGAAGAGAAGTAGTATTTTGTTTTTCATGGGAGTGGAAGTCCTTTCAAAACTAATCCGAGCAGTAGTGCTGTCTAGGCGGAGATTATTGAAAGTCGGCATTGGCTGCAGCTAGCGTTTTGTTTTTGGTACTACCTGTCAAACCCGGCGTC…	TGGGGGGTTGAGTTAAACCTATACTATTGGAAACCAAAAATCGGCAGAGAATTAAGGCAAATCAATTAAAATTCCTTTTCTCTCTACCTTTGCTAATATTAAAAACCATAGTTGTAAAGGGTACTTAATGCTATATTCCTGTTAAGTTTCCTATTTCACCTTGTTTTTTCCAATTCTTACCAATTTGAAGACTATGTTTTTAAACACCCAATCATTTTCCACCCACACATATATTACCCTTTTTTTGGGTGAAGAGAAGTAGTATTTTGTTTTTCATGGGAGTGGAAGTCCTTTCAAAACTAATCCGAGCAGTAGTGCTGTCTAGGCGGAGATTATTGAAAGTCGGCATTGGCTGCAGCTAGCGTTTTGTTTTTGGTACTACCTGTCAAACCCGGCGTC…
RPL27B	S_Paradoxus	1.48619	0.0210776	TGAGGAGTTGACTTTAACCTATATTATTGGAAACTGCAAGTTCGTAAACAGAATTAAGACAAACCAAATGAGATTCTTTTCCTCGCTACCTTTGCAGTCCTAAAAAATAATCGGTGGAAAAGAGTTTAGTGCCATATTCATGTCAAGTTTCCTATTCCACCTTGTTTTTCCCAATTTTTTTTCAATTTGAAGACTACGTCCTCAACCACCCAGTCTTTTTTGCACCCACACATATATATTATTTTTGGGTGAAAGGAGGTATTCTTTTTGTTTTTCATGGAGATATTCCACATTAGTCCGTGCAACAGTGCTTTTTAGGCGGAAACCTTTGGAAGTCGGCACTGGCCACAGCTAGTGTATTGTCTTTTGGCGGTACCTGTTCAAGCCAGATCTCTGCCT…	-
RPL27B	S_Mikatae	1.30213	0.0517434	ATGTGACTTGATTTGAACCTATGATACTTGACAAAGAATTCAAAAGAAAACTAATAAAAAGGAACTACACAATCTTCCTTTCTTGATAACATTGTCATTTTAAAAATATAAGTAATAAGGGCATTAAATGCCATTCACATATCAAAGCTCTACTGTTCCGTTCCACCTTGCTTTTTCTAGTTTGAACCATATTAGATGACTACCTTAAACATCCATACCTTTTTACATCCACACATATATATATATATTTTTTTTCTGGAGATTAGCCCTTTCCTTTATGTAAAAAGTTCCCTCCAAAAAACTGTCGGTGGAGATTCTCAAGAGGAGAGAGACCGCTAGGTGGAGGTTCCTGTAAGCTGACACTGGCAACAGTTCGCGGATTATGTTACGTCCCTTCCT…	-
RPL27B	S_Bayanus	1.47369	0	TACGATCAGGTCTTTACCTATACAATTTCAAACAAAACCTGAAAGTAAAACCAAGGCAAATCAATTATAGTTTTCCCTAATTCGTTACTGTCCTACGCAGCAGCAGTAGTTGTAAAGGGTTTTCAAAGCCATACGTACTTAAATTTACATCCCATTTTCATTTTCTCAAATCTAACAATTTCTAAGACTGTGCATTTACCACCCACACATTCTACATCCTTACATATTTTTAAATCATCTCTTTTTTATAATTGCAAGACTACTATTTCCTTGAGGCCGATCTTCAAAAATGAGCCCGCGCAAGCGCCCTGACAATAGAGCCGCTAGACAGAGAATCTCGAAGGACGACACTAGCCATAGCCTGAACATTGGGCTGTGGAGAAACTTCGGTCAGCCTGG…	-
RPL28	S_Cerevisiae	3.10253	0.0441078	ATGCTACGTACCTGTTTAACTCTTCTCATTTTATCCGTTTTCTTTCTTCACCGTTCCTCTTAAGTTCTTTATTTTTTTCATAACAGAATGATCACCCCTTTCACTTTGCCGCCAATATAATATTAACACACAAGAAATAAGTATGAGGTAGTTTGCTCTCGAAAAAACCAAGTAATAGTTCAAAAAATGAAAAAAAGAAAACAAATACCAAATTATGCCACCGTTACCTTACGTTTCATGGTTAATCATCGTTTACTGCCGCCTATGAGCGTAAGCTAATGTTATAAAGAAACAAGCTATAATATTGTTAAATATAGTTGATCAACAGCATTGTAATGATTACAAGAGACGAGGTGGAATGAACCTTATGAAATGCGTATTATATATAAACTGTAATAA…	ATGCTACGTACCTGTTTAACTCTTCTCATTTTATCCGTTTTCTTTCTTCACCGTTCCTCTTAAGTTCTTTATTTTTTTCATAACAGAATGATCACCCCTTTCACTTTGCCGCCAATATAATATTAACACACAAGAAATAAGTATGAGGTAGTTTGCTCTCGAAAAAACCAAGTAATAGTTCAAAAAATGAAAAAAAGAAAACAAATACCAAATTATGCCACCGTTACCTTACGTTTCATGGTTAATCATCGTTTACTGCCGCCTATGAGCGTAAGCTAATGTTATAAAGAAACAAGCTATAATATTGTTAAATATAGTTGATCAACAGCATTGTAATGATTACAAGAGACGAGGTGGAATGAACCTTATGAAATGCGTATTATATATAAACTGTAATAA…
RPL28	S_Paradoxus	2.82086	0.0604136	GCGCTATGTGCCTGCCTAACTTTTCTCATATCATTCGTCTTCTTTTCTCACAATTTCTCTTTCACTTTCATTTTTCTTAACAGGAGGATGATCACCCCTTTCACTTTGCCGCCAATATAATATCAACACAAGAATAAGGCATGAGGTAGTTCTTCGAAAAAAGAGTAAAACTACCAAAAAAAAAGTCAAAAGGTTCTCTCGCTACCCTTTTTCTCATAATTAATTAGCTTTTACTATCACTTATAGGCGTAAGTTAATGTTACAAGGAATTAAACTATGATAATGTATGAACGTAGTTGGTTAACAGTATAATAATAGTTAACAAGACGAGATTGAATGAAAACTATGATGTGCGTTAACAGGAGTTGATTCCAACTGGCATTTATGACATCTGACATC…	GCGCTATGTGCCTGCCTAACTTTTCTCATATCATTCGTCTTCTTTTCTCACAATTTCTCTTTCACTTTCATTTTTCTTAACAGGAGGATGATCACCCCTTTCACTTTGCCGCCAATATAATATCAACACAAGAATAAGGCATGAGGTAGTTCTTCGAAAAAAGAGTAAAACTACCAAAAAATAAGTCAAAAGGTTCTCTCGCTACCCTTTTTCTCATAATTAATTAGCTTTTACTATCACTTATAGGCGTAAGTTAATGTTACAAGGAATTAAACTATGATAATGTATGAACGTAGTTGGTTAACAGTATAATAATAGTTAACAAGACGAGATTGAATGAAAACTATGATGTGCGTTAACAGGAGTTGATTCCAACTGGCATTTATGACATCTGACATC…
RPL28	S_Mikatae	2.49273	0.0150497	GCGCTGTGTACCTGCTTACCTCCTTCTAATTTAACTTTCTCTATCTCAAAATTATTCACCTTTCAATTTCACTTTTTTGTAAAGAAGAAACCCCCCTTTCATGTTGCCGCCAATAGCATATTAACATAAAAGAGAAGAATAAACAGTTCCTCAAAAAGAGGATAGAAAACACCAAAAATAGCAAAATCGCTTGCACTTTGGTTTTCTTCTCGTGATGAACAAATGCTTGCCCTTTCCGATACTCTCAAGGTTAACGTTACAAATAAATGAACTACACTAATGATTAACACAGTTGTTGAGTGATACAACAACGAAAAAGCAAGGCCAAACTAAATTGAAACGATAGTGTGTATCTTTCACACAGACAATAGTAAAATCCAGTCCCAATCAGTCTTTAAT…	GCGCTGTGTACCTGCTTACCTCCTTCTAATTTAACTTTCTCTATCTCAAAATTATTCACCTTTCAATTTCACTTTTTTGTAAAGAAGAAACCCCCCTTTCATGTTGCCGCCAATAGCATATTAACATAAAAGAGAAGAATAAACAGTTCCTCAAAAAGAGGATAGAAAACACCAAAAATAGCAAAATCGCTTGCACTTTGGTTTTCTTCTCGTGATGAACAAATGCTTGCCCTTTCCGATACTCTCAAGGTTAACGTTACAAATAAATGAACTACACTAATGATTAACACAGTTGTTGAGTGATACAACAACGAAAAAGCAAGGCCAAACTAAATTGAAACGATAGTGTGTATCTTTCACACAGACAATAGTAAAATCCAGTCCCAATCAGTCTTTAAT…
RPL28	S_Bayanus	2.93928	0.0503081	TTGCTGAGGAGCATTCAGTTCTGATAAATGGTAACCGAATTGTATTGAACCAATTGAGGCCACGATAATTGCATAGAACAAGGCCTTTGTTAGTTTATTCTCATTTTGCCTCGGTAGGTTAACATTGGACAGTAAAGACGCACTGGATAGCATTCTATTCATCCTGGCCTGTATTCTTGCCAAACTCCTTGTAGGATTAGTCTTCCGTCTCCATTGTTCTTCACTTCTAATCACTTTTTCAGAAAAGTTGTCCCCCTTTTTATTTTGCCGCCAAGAAGATACTAACAAAGGAAAAAGAGATGGCAAAGTTCCTTAAACAGACGTGCAAGCACACAAGCAAGTTGTCCTCAAAATGGTGGCTAAGACGCTGCCAATGACAGCTGGGCATGGACTAATATC…	TTGCTGAGGAGCATTCAGTTCTGATAAATGGTAACCGAATTGTATTGAACCAATTGAGGCCACGATAATTGCATAGAACAAGGCCTTTGTTAGTTTATTCTCATTTTGCCTCGGTAGGTTAACATTGGACAGTAAAGACGCACTGGATAGCATTCTATTCATCCTGGCCTGTATTCTTGCCAAACTCCTTGTAGGATTAGTCTTCCGTCTCCATTGTTCTTCACTTCTAATCACTTTTTCAGAAAAGTTGTCCCCCTTTTTATTTTGCCGCCAAGAAGATACTAACAAAGGAAAAAGAGATGGCAAAGTTCCTTAAACAGACGTGCAAGCACACAAGCAAGTTGTCCTCAAAATGGTGGCTAAGACGCTGCCAATGACAGCTGGGCATGGACTAATATC…
RPL28	S_Kluyveri	1.52117	0.0176471	TTGACCTTTCGTTTGCTAAAGTGCATGAATCCTACCCCCTAATAGTCGATGGGAGATGATCTTCGGGCAATCGCGTAAGTACAAAAAGAGTCCGACACTGATTAAGCCCTAATTAGGGCACTTCCCACTTCCTGTCCATCCTACGTGGAGAGTGGACTTTACACCCATACATTTACTTGCATGATTTTACATCATATGGCTAGGCACCTGTACACCGCACAATATTACCAGATATGGTTCTGGTTTCGTTTTTTGTTTTTGGAAACCATTACTTGCATACACAAATACGTTCATACGAAAGCTCTTGATAGACTCTTGCCGTGTGTCGCCTCGACGGTCTCTGTTTCTCATTTTTTTCAAAATCATTGTCAGTTAAAACAACCAATACAGAAGTTTGGA…	-
RPL28	K_Lactis	2.10777	0.0462104	CAGAAACTTACCGCCCTGGCCACCTCGTCGTATTTCCTATCAAAAGCGGTCCAACCAAATAATGAATTGAGTATTTCCAGCCAACGAAGAAATATCTCTCCGATTTTGCTCAAAGTGTTTTCAGATCACGGTAGGTAGGACTGGTATAAGTATATCTCGAAAGTATTTCTTAGCAACAATGATCTGCAGCAAACTGATGTATATTCCTTGTGTTTCAATGTTTTGAGCATTAAGTTCCCTTAAAAGTAGACATACATAAGTTGGGACTGTTTTGCATCAGTACATCCAGAACTTTTTTTAACATTTAAAGAAAATAAAAATGGTTACCATATCTGGTTATTTCTGACTTTACCACTAATTTTTTGAAAATTACCAGACGCCGCTTTTTCAAGCTTACAG…	-
RPL29	S_Paradoxus	0.991023	0.0165813	TCTGTTTATCTGTCATATCCCCTATATTCATATTTATTCTGGGTCTTGTTACCATTTCTTCAAAAACCCGATCCTTATTTAACCTACTGTATTTAGAAAGTAAATAAATAAACTAAAATTAAAGTAAAATAAAATAAAGTAAACATGATCTTTCTTTCGGAGAGCAATGCTGAATCACACACATATACTGGTGGAAAGGGGGACGTAGTTTGTTTTTTTTTCTTATGTCGGCTTGCCTGTTTCGTCTCGCATCCGTGCATCTTCTTAAACCCATACAGTACCTGTTAATTTTTTCTAGTTTCCGATTTTTGGTTGTTTTTTTTTTACTGCGAGGGAAAAAAAATGTTCCTAGCCGCGCTCGGGAAAACCAACCATATTCTCAATGTAGGAAGTCCACGA…	-
RPL29	S_Mikatae	0.646605	0.0130209	TCTGTTTATCCGTCATCTCCCCTATATTCATATTTATTCTGAGTTTTGTTATTATTTTATTTTTTTTCAGAACCCCCTTTTAACCTACTGTATTTAGAAAGCCAATAAATAAATTAGATTCAAACAAAATAAAAAACGAAAATTGAAATTGACATTAATGTCACTGCTTAAGGGAGTAATGTTTAAAAAGTTGAAAAAGAGTTGCGTTACACGTCTTCGATAAACTTGCTTAACGCCACTTTAGTTTACATCCGTGCATTTTTTCACCCATACACTTATATGACATGCTTTTTCAATTTTCTTGACTTTGGTTCCCTTCTTTGGTTCCTAGCCGCGCTCGGTAAAACCGCTCGGCCTCAATGCGGGAGTCCATGATCCTCTCTCCCTTAGCTCTGTCAT…	-
RPL29	S_Kluyveri	1.02561	0.021465	TTTCTTATTTATTAGATTGATATTCATTCTGTACTTCTTTTTACATATTTGAACACCATTTCTTATGAATTATAAGCGAAAACGTATCTAGAGTACCAACGCACTATTCCCTGGCATTACTGCACCGTAGTTTTAACGCTGCGGATGTTTGCTACGGCACGATGGACACTGGCGGTGAACTGAGTTTCGACGTCTAGTTTCTACATTCACCATGTTTTGACTTGTCACCACATAACATCCATACATATTTAAAATATAAACATAAACCCATACATATTAAAACGCATATTTTTTTCTAATTTTTTTTTTAATTTTCCATTCTAAACTCTGAATAACGGGCAATTCCAGACATACCAGTTGATCCTACGGCATTCACTGGGCGATTCTTCCGACAGCGGG…	-
RPL29	K_Lactis	0.651412	0	GTCATGTTTATTTATTTCATCTGTACCTAAAACCTTTTGTTCATCTAACATTTTCTTTGGCACTTATTTAATTTGTAAATGAAAAGAAAAAAACAATCCGTACAGCAGTCCGTCATACTTTTTCTTTGATGTTTATGCTCACATTATTGTCTCATTATGTTGATCTTCATGCTTAAATATTTGACGATATATTATGTCGTGCAATCTTTATTTGAGGCTAGTATGGGTTTGAGATAAACAGTTTTGGTCCATGAAATTCTGATAAACGAGGACTGTTTAAACTTTAGTTAACACCCGTACACCCATTGGTTTTATTTCTTTCAAAATTTGGTGTATCTCGGGAAATTCAAAAACTGAAAGAAATTACCGTATTTAGTATTTCTGCTGCTCCATTTTCGT…	-
RPL3	S_Cerevisiae	3.40849	0.0134374	AGAGTCTTGGAGATTTTCGACCTGTTCAGACTGGCCAAAAGAGTGCTAATATGAAAATGTTCCCTCTTATAATATATAACATCTGTGACAAAAATCTATTCTTCCACCTATCGCCTGCATAACATGAGGCCTTTCCTGCGGGATAGCTTTTGCTTCAGGTTCTTCTGAGGTTCTGAAAATCAATATATTTTTCCGACAATTTCTCACTATGCCTCTATCCCCCTTAAAAAGAAACACTTTCTACCCTCTTTTCTAAACTCTGCACACTAGACCGAGACAGCAAATCGGAGCCCGAGAGAAAATCCGGAGGACGGAAAAACTAGAAGTAATCTTATGCGGGGAGCATGCACCAGAACGCCCAGAAAACGTGAATGACACTACATACTTTGATACGGATGT…	AGAGTCTTGGAGATTTTCGACCTGTTCAGACTGGCCAAAAGAGTGCTAATATGAAAATGTTCCCTCTTATAATATATAACATCTGTGACAAAAATCTATTCTTCCACCTATCGCCTGCATAACATGAGGCCTTTCCTGCGGGATAGCTTTTGCTTCAGGTTCTTCTGAGGTTCTGAAAATCAATATATTTTTCCGACAATTTCTCACTATGCCTCTATCCCCCTTAAAAAGAAACACTTTCTACCCTCTTTTCTAAACTCTGCACACTAGACCGAGACAGCAAATCGGAGCCCGAGAGAAAATCCGGAGGACGGAAAAACTAGAAGTAATCTTATGCGGGGAGCATGCACCAGAACGCCCAGAAAACGTGAATGACACTACATACTTTGATACGGATGT…
RPL3	S_Paradoxus	3.37135	0.0714439	AGTGTCTTGGAGACTTCTCGACCTGTTAAGTTTGGTCAAAGGAATACCAATGTAGAAACATATTCCCTCTTATAATATATATCACATCTGTGACAAAAACTACCCCTCCATCTATCGTCTACATGATATGAGAAGTTTCCTGCGGGATAACTTCTGCTTTAAGATCTTCTGAGTTTTCTAGAAGCCCATATGTTTTTCCGACAATTTCTCAATGAATCTCTATCCCCTTAAAAAGAAACAGCTCCTACCCTCTTTTCTTTATCCTGTGCATTTATATTCGGACAGCAAACCGGACCCGACAGAAAATTCGGAGGACGGAAAAACTAGAAGTAATCTCATGTGGGGAGCATGCACGCAGAACGCTTGGACGCGGTTTACAGTACATGCTTTGATATTGGT…	AGTGTCTTGGAGACTTCTCGACCTGTTAAGTTTGGTCAAAGGAATACCAATGTAGAAACATATTCCCTCTTATAATATATATCACATCTGTGACAAAAAACTACCCCTCCATCTATCGTCTACATGATATGAGAAGTTTCCTGCGGGGTAACTTCTGCTTTAAGATCTTCTGAGTTTTCTAGAAGCCCACATGTTTTTCCGACAATTTCTCAATGAATCTCTATCCCCTTAAAAAGAAACAGCTCCTACCCTCTTTTCTTTATCCTGTGCATTTATATTCGGACAGCAAACCGGACCCGACAGAAAATTCGGAGGACGGAAAAACTAGAAGTAATCTCATGTGGGGAGCATGCACGCAGAACGCTTGGACGCGGTTTACAGTACATGCTTTGATATTGG…
RPL3	S_Mikatae	3.13762	0.048145	AGTATTCTGTAGACTTTACAATCTATATAGATGTCGAATTGAAGGCCAATGAGATATCAAGTTTATTCTTATAATATATATCATACTTGTGGCAAATTCCAATTCTCCACCTCCCGCCTTGATGATATAAGAGTTTTTTTGCGGGATAACTCTGCTTGAGAATCTTCTGAAGTTTTAAAAGCCTACATTGTTTTTCCGACATTTTTCACTGTACCTTCATCCCCTTAAAAAGAAACATCTCTTTCTAGCCTCTTTTCTCTATCTAGTACATAAGATTCGGACGGTCAATCGGAGCCCGAGAGAAAATCCGGAGCACAGAAAAAATGGAAGAGATCTCATGTGGGGACCATGCACGCAGAACCCTCTGAAGACGCAGATATACTACGTGTTTTGGTATTA…	AGTATTCTGTAGACTTTACAATCTATATAGATGTCGAATTGAAGGCCAATGAGATATCAAGTTTATTCTTATAATATATATCATACTTGTGGCAAATTCCAATTCTCCACCTCCCGCCTTGATGATATGAGAGTTTTTTTGCGGGATAACTCTGCTTGAGAATCTTCTGAAGTTTTAAAAGCCTACATTGTTTTTCCGACATTTTTCACTGTACCTTCATCCCCTTAAAAAGAAACATCTCTTTCTAGCCTCTTTTCTCTATCTAGTACATAAGATTCGGACGGTCAATCGGAGCCCGAGAGAAAATCCGGAGCACAGAAAAAATGGAAGAGATCTCATGTGGGGACCATGCACGCAGAACCCTCTGAAGACGCAGATATACTACGTGTTTTGGTATTA…
RPL3	S_Bayanus	4.08329	0.0641576	AGAATCTTGGAGACCTTTCGGTGTGGCTAGGATATAGAGGTGGGAAAAAGAAATTGTTGGTGAGCAAACAAGCACGTTCCTTTTTATAACATGGCGTTAGTGGCGAAGTGGAACTGCTCGACCTACTTCTTATTTGAGAGGGTTTTCGTGGGGCAACTTTTGCTCAAGAAGGTTGTGCAGCTTTTCTAGTGCCCAATATTTTTCCGACATTTTTCCACTGTTCTTCCATACCCTTAAAGGAACGGCCTACGCAATTTTCATTTCTTCGACGGTTGGGCAAGGAGCGCCCTCTCGGAGCCCGAAAGAAAATCCGGAGGTCGGAAAAATTAGACGTAATCGCGTGCGGGGCATGCAAGCAGAACCCTCGGAGAAATACCTGCACCGCACGCTTCGCTGTCA…	AGAATCTTGGAGACCTTTCGGTGTGGCTAGGATATAGAGGTGGGAAAAAGAAATTGTTGGTGAGCAAACAAGCACGTTCCTTTTTATAACATGGCGTTAGTGGCGAAGTGGAACTGCTCGACCTACTTCTTATTTGAGAGGGTTTTCGTGGGGCAACTTTTGCTCAAGAAGGTTGTGCAGCTTTTCTAGTGCCCAATATTTTTCCGACATTTTTCCACTGTTCTTCCATACCCTTAAAGGAACGGCCTACGCAATTTTCATTTCTTCGACGGTTGGGCAAGGAGCGCCCTCTCGGAGCCCGAAAGAAAATCCGGAGGTCGGAAAAATTAGACGTAATCGCGTGCGGGGCATGCAAGCAGAACCCTCGGAGAAATACCTGCACCGCACGCTTCGCTGTCA…
RPL3	S_Kluyveri	1.97373	0.0164223	AGCTGAACAAGTATTTAATCGTCTGTCGTTACAGTATAGAATGATAATTTTGATGAATTACGTCCTGCACTGCCGAGCCAGTTTCGTATACGACCAAAAACTGCGGAAGAATCTGCTGATCTCAAACTTCTCGGTCAAAGTCTAGAGATAGTGAGTGTAAATGGTGCTAAAATGTTGTGTTTTTCTTTCGAGTCCTACAAATCTACAAGGCCATCTCGTCTCCAGTCACAGCTATCAAAAATCATTCATTTATTTCATAGAGCTGACAAAAGAACCATATTCTCTCCATTTCTTTCCCAAGGAAAACTCAGCTTTGATTAGACAGCATTCGCTGCCTCGCACACAAATACCAAAGCGGTCCAGCTCTCTTGTGAAAGTAATAAAAGGGTCTTGGTCCCT…	-
RPL3	K_Lactis	0.689604	0.0122663	TGGTTCTCTTAGAATCACAAGGGGGGACAAGAAGAAAAACATCTACGAGACCTATGTATTACCCGGGCTGATGCCCGGGTGTGTTTTCTTTTTCTTCGCTTATTGCTTTTCCTTTCGGAAAGATCTGTACGGGGCGACCTGTTGTTTCGATGGGGAGCCAGAAAAGTTTTTCCGACTGGTTGGAGAAGGAGATTTGACAGAAATAAAACAGCTTGAGTATCCAGCTCTAGCGGAGGTGCGCAGTGGGTGTCGTAGGAAGAAGCGGGAAAAACGGCAGTGTTGTTTTTCCGGGATTCGTCTCGTAAGGTTTTTCCGAATGGTGTGAGGAACAACTTGATGGTGAGACTTTTTGGAGATCTCAGTTCGTCACATTACGTAGTGGTAATAAATCGTGTTGAT…	-
RPL30	S_Cerevisiae	1.88815	0.050623	TCACTATATTAATCCACGTTTTTCAAACATATTTGAAAAAAAAAATGTTAGTAAGTCTATGCTTTTCATAGGTAGCCATCTTGTCAATATAAATAATGGTAATCCGCATGGTTGTTCAGGCGTTCGCAAAATTGTAGGAAGAGGAGAACGTGGAAATATGGACTTTTTGCAAATTCAGAATTCATTTTACTAGGTTCTTGCAACATGGATAACATCTCACGCTGTTATTTTTCATGCTTCTCCATATCGTATATATGTAATGAAGCATTTTCATTGGGTTTCCTGCTCAAAGGTTGACATATATTATAAGTTATACTGGAACAAGCCACAATCCTGTCAAAGTCTAAATTCCGGTGTATTGGCTATCTGAAGCTCTCTCATATATTAATACATTGCTTT…	TCACTATATTAATCCACGTTTTTCAAACATATTTGAAAAAAAAAATGTTAGTAAGTCTATGCTTTTCATAGGTAGCCATCTTGTCAATATAAATAATGGTAATCCGCATGGTTGTTCAGGCGTTCGCAAAATTGTAGGAAGAGGAGAACGTGGAAATATGGACTTTTTGCAAATTCAGAATTCATTTTACTAGGTTCTTGCAACATGGATAACATCTCACGCTGTTATTTTTCATGCTTCTCCATATCGTATATATGTAATGAAGCATTTTCATTGGGTTTCCTGCTCAAAGGTTGACATATATTATAAGTTATACTGGAACAAGCCACAATCCTGTCAAAGTCTAAATTCCGGTGTATTGGCTATCTGAAGCTCTCTCATATATTAATACATTGCTTT…
RPL30	S_Paradoxus	1.76613	0.108615	TCACTATACTAATTCATGTTTTTCAAACATATTTGAAAAAGAATTTCATGTTAGTAAATCTATACTTTTTAAAGATATTCATCTTGTCAATATAAATAATGGTATCCAGTATAATTCGGGAGTTCGCACAACTTTAGAAAGAGGAGAAAGCAAAAGTGTAAACATTTGTAAATTTTAAATTCTTTTTACTAGTTTCTTTGAATATCGACATCTAACCCGTAATTTTCGTGCTTCTCCATCGTATATACGTAATGAAGCACTTTCATTGGGGTTTTGCTCGATGGCTGACATATATTATATGTTACGCTAGGATAAACTTTAATCCTATCAAAAATTAATTCCGGTATATTGGTTTTCTGAAATGTCTCATATAATAGCACATTCTAACATAATGCTGCC…	-
RPL30	S_Mikatae	1.79926	0	TCACTATATTAATCCAGGTTTTTCAAAGTTAATTGGAAAAATTCATGTTAGTAAATCTATATTCTTCACAAATAGACATATTGTCAATATAATAATGGTATCCGGTACGGTTATCTGGAAATTCCTGCAATTTTGGGGAGAAAGAAGGTAAAACGAGGAACATTTGTAAATTGCAATTTCCTTTACTTATCATTTCTTTGAATATTAATGATATAGAGCTCAGTCATTTTCACGTTCCTGCAACGTGCATACGAAGTAAAGCAATCTTATTGTGTATGTTGCTCCATAATTGACATATGTTGTACGTTACACTGAGACAAACTTTATTCTTACTAAAATTCAACTTTGCTATATTGGTTTAATGAAATACATCACACGCTAGAACATTCTAACATAATC…	-
RPL30	S_Bayanus	1.96727	0.0659736	TCACTGTAATCAAACGCATTTTCAAAAATATTTGAAAAAATTTCATGTTAGTAAATCTAATTCAACGTAGTAGTTGTCTTGTCGGTAGAAATAATGGTATTTTTGCTATTCGCGAACTTCATGTAGTTATAGAGTGGGTGAGGTAGTACAACGGGTGAACATAGACTCTTCCTTTTGTGCTGACAGTTCTTCTCCAAGTTGATAATATTTTATTCCAGTCATTATTCGTGTTCCAAAATTCCGCCCTCGCCAAAAGCTCTTTTATTTCGGTTATCTTGCTCAATAATTGGCTCTATTTGTACTAGGATAAACCTCAATCATTCAAAATTGGGTTCAGCTGTTTAGGCTCAATGGAATATCTCTTATGTTGCTCGTTTCAACGTCGTGTAGCATTCAGTC…	-
RPL30	S_Kluyveri	1.31319	0.0430128	CCACGCTGGCCAATCCCATCAGCACACACTATCATTTGTTCCTGTGGCCTTAACACTGGCTGGACGTATCCCATCCGTATTCCAACAAGTTTCACTTCACGCTGATTCTGTTACAATTACGACATCACAGGTAGAGCCAGTACTTTCCTCCGTATTTCTCGGGCAATATTCTAACCATTGGACATACCTAATAAGTTGTTGCTTGAGGTTTTTTTGTAAGACAAGACTAAAATCAAAAACAAACTACGTTTAAAATCACCATCATGTAAGAAGTTTTCTTCAAACCGTGAAAATTGTTTGGCGAGACCGAGACCGTGGGTGTAGGCCGAGCCTGGACTGGTACCGTGTCTGTCTGCCTACGCTGCGCACCGGCGGTCAGCCCGCGTAGCGCTGCGCTCG…	-
RPL30	K_Lactis	0.827684	0.0226047	TTCAGAAAATTAGTGCGATCACGGTACATCAATCATGCACGTTAATTTATCCTGTTCATTATTCTATCCATTATTCTATCATATTGGCAATGGCCTCACTCTCAAACTCAATCTTTCAAACGTTCCGGTATTCTCATCCATTCGTTCATTCATTCAGAACTCTCTTCTCAACACGCGGTCTGTACTATATTTGTGTCAGTCGTATATGGAGGCGTATGGTGCATACTTTTTCACTTGATTGGCTTGGTCTATCTAAACAAAGGCCTCTATTAAAACGTATATATGTCTTAATTGGACCTGTACACACTAATTAACTTGTTATTCTCTGTAATTGTTGATTCCAAAATTGTTAAATTGTGAGAAATGTCGAAGACAGGCCAAGCTGCCTGGAACAGGTCC…	-
RPL31	S_Kluyveri	1.15389	0.0165746	TACACGTACGCACCGAATATATGGTCCTGTAACTCGAACCTGCTTCTTTCAAGTGAATTGATATGAAAAACGTCCCTTATGAACTTACACCTTGAGGCCGATCGAAGCCTGAGGAAAGAGCACCGAATATAAACGACGACCGCTTTTCGTGACTGTTTTCATATGCATCCGTACATCTTGTGTTCTGGTACATACACCCATACAGTTATGAAAATACATTTTTTGTCTTTTATTTTTTATTTTTTTAGCGGATCGCGTTTTGGAGCTGTTTTTTAGTTTCCCCTCAAAGTGGCAAATCTTGCGCGAAGGAAGAGAGGCCGGCAACAGCAAGCCCAGCGCAGGATGGGCGTACCTCGCCGTCCTGTGGCAACCTCTGCCTAGCTCTCTCCCGCTACAGTG…	-
RPL31	K_Lactis	1.22768	0.0252156	ATTCAAACAGTGGCTGAAAGCTGTTGAATAAATCAAAGTTTTACCAGCTATACAATCGGCAACTAATCAATTGAGCCACTGCGAAGTTCTCAGCTTGTAATAATGTATCAATCGACCCTGCTCAGGAGTAAATTTCTCTCGATTTATATTATGAATTCACTGTGTATTCGATGTACAGATGGAGATTCTTTCATTAACAACATTCATCACCAGTTTGACCATAATAGTCTATATACGGGACTGTTATAACATCCGTACATTCGTGAGGCTTCATTTGTTCCACTGTAACATCCGTGCACTCTGATGTAAAATAGTTTTATGTTTTCATTTTCTATAATAGGAAACTTTCATTCCGCATTTCGCACTTCGAATGACACAAACATTTCTAGGACATGTTGT…	-
RPL31A	S_Cerevisiae	1.69313	0.017155	TGCGAGTAAATTTTCCCTTACCTTCGTACTAAAATACCGTTATTTGTCAAAACGCTGTCATGGAATTCTATAGCACTTGATGCCGGAATGGAGATGCTTATTCTTGTGTTCTACATTCATGAAGTGCTGATACTATATTTTGTTTTCCCGAACCTCTCCCCTTCTGGGCCCTTTTTCCATTATTCACAATATTTTCATACCTTTACCTCCGTACACCAATCTTTATTTTTACCCCCATACCTTTGTATTCTGAAATTGAGAAATGATTTGTGGTGCTTTTTTTTTTGGACAATCTGCCTTCGTGGACAGTTTTGAAACGCTAGGCGACAGTTTTGCAACGGAAGGAAGTGGGAGAGCCCAGAAAGGCTTTCTCTCGATGGTGGATCATTCTTGCGCAGG…	TGCGAGTAAATTTTCCCTTACCTTCGTACTAAAATACCGTTATTTGTCAAAACGCTGTCATGGAATTCTATAGCACTTGATGCCGGAATGGAGATGCTTATTCTTGTGTTCTACATTCATGAAGTGCTGATACTATATTTTGTTTTCCCGAACCTCTCCCCTTCTGGGCCCTTTTTCCATTATTCACAATATTTTCATACCTTTACCTCCGTACACCAATCTTTATTTTTACCCCCATACCTTTGTATTCTGAAATTGAGAAATGATTTGTGGTGCTTTTTTTTTGGACAATCTGCCTTCGTGGACAGTTTTGAAACGCTAGGCGACAGTTTTGCAACGGAAGGAAGTGGGAGAGCCCAGAAAGGCTTTCTCTCGATGGTGGATCATTCTTGCGCAGGC…
RPL32	S_Paradoxus	0.575233	0.0149153	TATTTATGTTCCACACTGTTGTCAGATCAGGAATGGAACGAAGAGGCTCTATTTAAACCGAAGATACCTCTTCGTTTCTCAATATTGTTGGCTGGGCTTTTCTTTTTTTTTCCTTCCACGTCTATCTATTGTCTCCATCAAAATTAAGAAAAAGAAATGTAGAACGATGAGCCAAACGAGGCTAAGACAGTCATGCATCTGTACATTCCTTAATGTTTGGGTGCATGTACTCAATTCATGTTTGTTTTTTTTCAAACCAAGAATTGGAATGGAAACAGGCGGCCGAAATTCGCTGCCACAGCACATCGGAGGAAAAAGGCGAGGGGGGTGGAATGGTGGACTAATTGTTTGTTGAGCCCAGCAAGCAGTTCTCAATAGACGGTTGTTGGACGGGGCGCA…	-
RPL32	S_Mikatae	0.695379	0.0242908	TATTTTAGGTTCCACACTTTTGCTAGACCAGAAAAGGGAATGAAGAGGCTCTATTTAAACCAAGAACACCTCTTCGTTTCCCAATATTGTTGGGCTTTTCTTTTTCTTTTTCTCTCCAGGTCTATCTATTGTATCTATCAAAATTGGGAAAAAAGAAAGTAGAACGATGCGCCAAACGAGCCTAAGACCATTACCCATCCGTACATTCTATCATGTGTGGGTGTACATTTCAAATTGTTGTTGTTTTTTTTCGGTTCTGATTGAATATCGAAGTGAAAGGGGCCGGCCGGAGGTGCGTCGTTCCAGTAAATTGGAGTAGAGCGGAAAGGGAAAAGACGCGCACTCCCTTTGTTGAGCCCGCCAAGCTGGTCTCGATAGACTACTGTTAGACGGGGGGTA…	-
RPL32	S_Bayanus	0.794334	0.0150743	GAGTTACGTTCCACTTGCTAGACCAGAAACGGGACGAAAAGGCTCTATTTAAATCAAATACACCTCTTCGTTTCTCAATATTGTTGGGCTTTTCTTTTTTTTTTTTTTTTGCTTCCACGTCTATCTATTGTCTCTATCAAAAGGTGGGAAAAAGAAACGTAGAACGATGAGCCAAACGAGGGCACGACTGTTTTACATCCGTGCATTCTCGGATGTTTGGGCGCGTTGTCGACTGTTGGTTTTTTTTTTCGTTTAAAAAAAATACTCAGGCTGGAAACCGCCCGAGCTGGAGCCGCTTGCTGCATCAGCAACTGCAGGCCGGAAAATGCCTACCGGGCGCTGTTGGGCCTAGCAAAATGGGCTCGGCAGCCATCCGTTGGGCGGGGTACTGGCCCCGCT…	-
RPL32	S_Kluyveri	1.08673	0.0125216	ACAAAAATTGGCGGTATCCACGTTCTCACAAAATTAAGTCTAGGTAGGGCAGTAAATATGGTAGATTAAACGGATGTTCTTTATGGGTTTGTGCCAGTTTGCAAAGGTATCGTCTTTTTACCGACCATAATATAATTAATACATGTGGTGTTTGGGCTTCCTGGTGCGTGTTTTTTTTTCCTGTTTCGTGATGTGCGTGCAACTGTGATATTTTCTGGCTGTCTGGAAACTCTCGGCCTGGGCAGCAGACCCGCGGCCAGTCCCGCTGCGTCTCCTTCCCGGTCTTGGTTGTGCCAGAGGGGATCCTGTGCCAGCCCCGCTGCTGGTCGCCCAGCCTAGCCCGAAGGCCTCCCCCTGGGCTGACGCCTCATGCTACGCTACCCTCGCCACTTCGTGCTT…	-
RPL32	K_Lactis	0.599194	0.00858733	CAGGCAATGGACTGAGAAGGGTACACGGGAGGCAGATCCAATACCTGTCGGTAGGCTGGCACACCCCTTTCCCGTTCGCTCAGCTTGGCAATGGGCTAGGCAGAGAGGGTTTGGCTTCCTTCTCCCCAGCTCGGACAGTCTCTCTACCTGTGGACAGAGGAAGGAATCAGTTTGCCAGGCGGAGAAATATGGTAGAGGGAAAGCGGGCCTAGCAGCAACCAGTTTGTATTACGTTCTCTGTAGTTTGTGTGTCTGGAACTTTTTGGTTTAACGAAATAGTATAATGTTGAAAAGTTGAGTTTATACGTTATATATGAAAGTACTGTTAATGGTATTGGTATAGGTATCAGATAGAAAGACTCAGCAAGGAAAGAATAGTTCAAGGTATGTACATAGTGG…	-
RPL33	S_Kluyveri	0.582857	0	AGGAATAGATGGCCAAACCGCTTAGGGTTGTGGACCAAGCTAAAGTTAATACAAATTTTTGTTCTCACTCTTGGGTACAAAGGTTCTGCGGCTCATCAACCAAGTTGGATTCAGTGGCTCTTTTGAAGAGTCAAAGAGTGACGATTCCTATAGAAATGATCCTACTGTGGAAGGTGTTAGTTAAAATCTCTGTCAAATACTGGATGCGAAATAGGAATGTAATCCAAAAATCCAACTTGGAAACATCATCAACGGCAGACAGATTCCAAACCAAGTTTGGATTGCTGCTGTTGATTGATAGTGTAGGGTAAAACACATACTGAAGTACGTCGACATAGATTTAAAAAAGAATAAAAAAAAGATGTGCAAAAAGATGAACAATGAAAGGATACCCAAGCC…	-
RPL33	K_Lactis	1.23759	0.0261113	AAGTACGTCGACAACTATTTAAGAATAAATCAAAAAAGATTTAACATAAACGCGCAACAATAGTTTTCCAACATCTTCCCATCATACCTCGCCTTTTATACTTTTTCAATTGGATTATTTTTCACATCAGTCAAGTTCGAAAAAGAAATTATATATTCGGGTAACGTCTGTGGCGAAGGGCTAATGCTGGGTTAGGGTTTACAATATCTGGCCGGGTAATTCATCGGCACAACTGACACGAATCTCATTGAACAGGCACAAAATGGTCAACCTGATCTCCGGTGCCTAAACACTTTGAAGCATACCTGTAGCGTCCAATATAACAACCGTCACTAGTTCTACCTTGAGTGCCCTCATCAGCTGAATTTCCTTCTCTTCCTTTCACTTTATATTATGTAT…	-
RPL33A	S_Cerevisiae	1.72994	0.035205	ACTAAGTATAATGCGGCTCCAAAATACTGAATCAAACCTTTGATTCGAAAATATTTTGGAAAAAATAAATGATTTGATTGACTTGTCAGACTGCCATTTGTACCCACCCATGAATCCCTATCCTTCCAAAATGGAAGCACATAGGATGGGTCAAGATCATCGCGCCATTAAATATCGCAACAAATTCCAAAGGAAGTTATCACAATTGCAACGGCAAAGCAAAATTTTATTCAAAATTATAGATGGCCGAACCGCTAAGGATTGCGGACCAAGCTAATTTAAATTCGATTTCATTTCCTCACTCTGGGGTACAAAGGTTATGGGGCTCATCAACCAAGTTGGATTCAGTGGCTCTTTTGAAGAGTCAAAGAGTGACGATTCCTATAGAAATGATCCTAC…	ACTAAGTATAATGCGGCTCCAAAATACTGAATCAAACCTTTGATTCGAAAATATTTTGGAAAAAATAAATGATTTGATTGACTTGTCAGACTGCCATTTGTACCCACCCATGAATCCCTATCCTTCCAAAATGGAAGCACATAGGATGGGTCAAGATCATCGCGCCATTAAATATCGCAACAAATTCCAAAGGAAGTTATCACAATTGCAACGGCAAAGCAAAATTTTATTCAAAATTATAGATGGCCGAACCGCTAAGGATTGCGGACCAAGCTAATTTAAATTCGATTTCATTTCCTCACTCTGGGGTACAAAGGTTATGGGGCTCATCAACCAAGTTGGATTCAGTGGCTCTTTTGAAGAGTCAAAGAGTGACGATTCCTATAGAAATGATCCTAC…
RPL33A	S_Paradoxus	1.85395	0.0837998	AGTGAGTTACTTAGTGTTTATGATTGTAGTAAATAGTTTTTTTAAAGTAATACTATATGATTTGGCTCCAAAATACTGAATCAAACCTTTGATTCAAAAATACTTTGGAAAAATAATATAAAAATAGTTGATTGACTTGTCAGACTGCCGTTTGTACCCACCCATGAAGTCCTATCCCTTCCAAAAAGGAAGTACATAGGATGGGTCAAGATCATCGCGCCATTAAATATCGTAATAACTTCCAAAGGAAAAAATTACAAATGCAACGGCAAAGCAAAATTTTTATTCAAAATTATAGATGGCCGAACCGCTAAGGATTGCGGACCAAGCTAATTTAGATTTAATTTCATTTCCTCACTCTAGGGTACAAAGGTTATGGGGCTCATCAACCAAGTTGGA…	-
RPL33A	S_Mikatae	1.97848	0.0715715	GCTATATATACGATTTTGGCTCCAGAATACTGAATCAAGCCTTTGATTCAAAAATATTTTGGAATATAAATATAATAAAATAACTTGTCAGACTGCCATTTGTACCCACCCATGAAACCCTATCCCTTCCAAAAAGGAAGTACATAGGATGGGTCAAGATCATCGCGCCATTATTATCGTGAGAACTTCCAAAAGGGAGTAATCACAATTGCAACGGCAAAGCAAAATTTTTATTCAAAATTATAGATGGCCGAACCGCTAAGGATTGCGGACCAAGCTAATTTAGATTCAATTTCAGTTTCTCACTCTGGGGTACAAAGGTTATGGGGCTCATCAACCAAGTTGGATTCAGTGGCTCTTTTGAAGAGTCAAAGAGTGACGATTCCTATAGAAATGATC…	-
RPL33A	S_Bayanus	1.94387	0.0465776	ACCATAGCATTTAGTTCCAGAATACTGAATCAAACCTTTGATTCAAGAAATACTTTGGAAAAAAAATATGATTGGTTAACTTGTCAGACTGCCATTTGTACCCACCCATGAAGCCCTATCCCTTCCAAAAAGGAAGTACATAGGATGGGTCAAGATCATCGCGCCATTAAAGATCGTAAAAGCTTCCAAAGGAAGAAATTACAAATGCAACGGCAAAGCAAAATTTGTTAAAAATTATAGATGGCCGAACCGCTAAGGATTGCGGACCAAGCTAATTTAGATTAATTTCAATTTCTCACTCTAGGGTACAAAGGTTATGGGCTCATCAACCAAGTTGGATTCAGTGGCTCTTTTGAAGAGTCAAAGAGTGACGATTCCTATAGAAATGATCCTACTGTT…	-
RPL33B	S_Cerevisiae	1.60645	0.020426	GATGTACTAAATCTAATTGACAGCAGAATACAAAGCCTTTATATATGTCTGGTGGGGGAAAGCAAATGAGAAAATTTTCAGGATTTGCCTTCGCCTTAAGGCGCTGTATGTGAAAAGAAAAAAAATCAGGGTTAATAGTAAAAGGTATGTGGGGTATGGGGGGGTGAAAAAATTTTGACGGCCTGTATAAACCCATACAATCAGCCCATACATACTACTGATATTTTTATAAAAAAAGAATCAATATTTTTTTTGAAACGTACGGTATATTGTGAGAAAGCTTTACCGGTAGACGGGCAATCAGAATTTGTTCTGCCTGGAGACCGCTTCTCTTTACACCATCTTCTTCCGGCCAGTGCAACAGAGCGTCACTGCTGGGGGGAACTCTGCCTGGGTACC…	GATGTACTAAATCTAATTGACAGCAGAATACAAAGCCTTTATATATGTCTGGTGGGGGAAAGCAAATGAGAAAATTTTCAGGATTTGCCTTCGCCTTAAGGCGCTGTATGTGAAAAGAAAAAAAATCAGGGTTAATAGTAAAAGGTATGTGGGGTATGGGGGGGTGAAAAAATTTTGACGGCCTGTATAAACCCATACAATCAGCCCATACATACTACTGATATTTTTATAAAAAAAGAATCAATATTTTTTTTGAAACGTACGGTATATTGTGAGAAAGCTTTACCGGTAGACGGGCAATCAGAATTTGTTCTGCCTGGAGACCGCTTCTCTTTACACCATCTTCTTCCGGCCAGTGCAACAGAGCGTCACTGCTGGGGGGAACTCTGCCTGGGTACC…
RPL33B	S_Paradoxus	1.52942	0.117323	AATGTAAGAATTGGAAATAGATGAAATGAGGAGCCTTTATATATGTTTGGTAAAAATGGGCAAATGAGAAAATTTTCAGGACTTGCTTCACATAAACGCGCTATATGGGAAAAGAAAAAAAGTCAGGGTTAACTGTAGAAAGTATGTGGGGTATGGGGGCAACAATTTTTTGACGGCTTTTGAAAACCCACACATGAGCCCATACATACTACTCTAATTTTTCTGTCGAAACAGAGGCAATAGTGTTTTTGCAGGTGAATGTTATGATTGCGAAAACCTCTACTGGTAGACAGACGATTAGAATTTGTTCTGCCTAGAGAGCGTTCCTCTTGCATACCATTCTCTTCAAGCCCAGCGTAGCAGAATATCACCACTGGAGGGGCCCTGCCCTGTGCACTA…	-
RPL33B	S_Mikatae	1.50667	0.0419268	ACACATTCAAATAATTAATAAATAAAAGGTAGACCCTTTATATATGTTTGGTAGGAAAGGTCAGAAGAGAAAATTTTTCGGGTTAGCTTTTGCGTGAAAACATTTCTGGTGTAAAAAAAAAAGTCAGGGTTAAGGCAGGAAAGTATGTGGTGTATTGCAGGTCAATTTCAACGCCATATTTAAACCCACACATGCACCCATACATAAAGATATTTGCGGAAAAAAAAAAAGTTGTAAATTTGTGAGACGGATGACATGACCGTGAAAACCACTACCGGTGGAAAAACGATTAGGATTGTTTTGTCCAGAGAGTGGTCCTCTCATGTGGACTTCCCTTTGAGCTACCACCACATCAGTCACGCGGAGGTAGTGCTTTGCCCTGCCTACCGTAAGCGGTTG…	-
RPL33B	S_Bayanus	1.70737	0.0551515	CACAAACAAATACAACAGCTAGCAAAATGCTGAGCCTTTTTATATGTTTTCCCAGGAAGCTCACAAGAAAATTTTTCAAGTCTTGTCCTTCGCCTAAAGACTTTGTTACGGACTGGAAAAAAAAAGCAGGGTTAAGCTCGTACAGTGTGTGGGGTCTGGGCGCGCGTCTTTTCTAGACGGCGTCACTAAAAGACCCATACATGCACCCATACATTTATGAATTTTTTATTTTGTCTTGGGAAATAAAGTAAGCTCTGCGTTTCTGAGTGGCGCGCAATACTTGTGAAATTAACTGCTTGCGGGGGCAGGACGATCGGAAAGTGCCCTACGCAGAGGATGGTCTCTCTTTAGCCATTTCCGCTGGGCCTAGTACGTCAGAATTTCACCTCTAGGCAGGGC…	-
RPL34	S_Kluyveri	1.1732	0.0326117	CTGAACGGGCATGAGTAGTACCAGGTTTTATAAATAAATTACTAATACATAGCTTATAGGTTCTAGTTAACCCAAGTTGTTCATCCGATACGAACACGCATTTTGTCTTTTTTGTCGATGCAAATTGGACAATAAGTGTAGTAGGTCGCCATTTTTTGAGATAAGGCTTCCCCAAACACCGAGCATAATTACAGTTATTTATAATCATGGGATCGAATGACTTTTGTTTTGACTGTCTATATTTTTGTGAAATATGTATGGGCTCTAACGGTGAAAAAAACATTTCTTATTTACACATGTGATGTATGGGTTCAAATTGCCCTGCCGCTGAAAAAAATAATACGATCAATTGGAATGTCTTTCGATGCTCTTTTTTTTGCGTCGGTGTAACCTCGCGTT…	-
RPL34	K_Lactis	0.784842	0.0323788	TTGCAGTAATACGTTTGTTTATCTGAAGTATATTATCCTTTACTGTCACACATAGAAATGCTTTGACTTATATATAGACTATTCTGTATATAAATATATACTGAATTTTAACATACATGTCCCCAACGCAAGCATCCTTATCTTCATCTTCTGCACCGCACTTAAGAAATAGCTTTCACTTTTTCTTTCATGAGGTTCGTACCATTTGTCTCCTCCAGTCAAAGGCAAAAAAAATGAATATTGTTATATCGAGGACTGTTCGGTGATGTAAGGGTTCTTGAAAAATTATCTGTTGACAACTCTCCTTAAATTTGAGCAGAAATATCTGATTCTTAATTAGGAAAATTCAGTTTTGATGGAGTACAGGAGAGGGGTTGACTAGAGGGAAAATACTTCCAG…	-
RPL34A	S_Cerevisiae	1.00529	0.0102555	GGGCAAGTCTTAATAGCGTCTTTTAGAACTTAGGATTTTACTACGTATTTTTTAGCTTTATAATATAAAGCCCATAGAAGTATGACTTTCATCACCTTCCCATCTGAAGAATGTACATTGTACATTGTATACTAATTTACTTGGTTCCTTCTACAAATACGATGCTCTTCGAGGACTGTTTTTTCCATTAAACATTAGGATGTAAAGGTGTTCTCAAATATATAACACATTTAGTGGTATGTATGGGTGATAAATTTTTTTCCATATATTGTGAAAAAAAAAAGAAGCTTGACTTTCGCTGTTCCCGCTTACGACTACGCTCCCCCGCTAGGTTCCCTTTAGGCCGTCATTTTCTACTGAGCCAAGGCGATTCTGGTAGTTACTCGCGCTTGGTCCCCT…	GGGCAAGTCTTAATAGCGTCTTTTAGAACTTAGGATTTTACTACGTATTTTTTAGCTTTATAATATAAAGCCCATAGAAGTATGACTTTCATCACCTTCCCATCTGAAGAATGTACATTGTACATTGTATACTAATTTACTTGGTTCCTTCTACAAATACGATGCTCTTCGAGGACTGTTTTTTCCATTAAACATTAGGATGTAAAGGTGTTCTCAAATATATAACACATTTAGTGGTATGTATGGGTGATAAATTTTTTTCCATATATTGTGAAAAAAAAAAGAAGCTTGACTTTCGCTGTTCCCGCTTACGACTACGCTCCCCCGCTAGGTTCCCTTTAGGCCGTCATTTTCTACTGAGCCAAGGCGATTCTGGTAGTTACTCGCGCTTGGTCCCCT…
RPL34A	S_Paradoxus	0.867332	0.0233481	GAGCAAGAATTAATAGCGACTTTTAGAAATCAGAGTTCTACTAAATATTTTGTAGGTTAAGATATAAAACCCATAGAAATATGACTTTCGTCGCCCTCCCATCTGAAGAATGCACATGTTGTGCTAATTTAGTTGATTTCCTTTTGCATACCTGACATTTTTCGAAGACTGTTTTTTCAATTAAAAGAAGGATGTAAAGGTGCACTCAGCAAGATACATAATTCAGTGGTGTGTGTGGGTGAGGAATTTTTTTTTTTTTTTTTTTTTTGTTTTTATCTTTTGAAAAGGAAGAGCTTGATTTTGGCTGCTCCCGCTCTGTTAGTGGTTACGACCACACCCTTCACAATTTTCTCATTATACCGTCATTCTCCGCCGAGCGGAAATGCCCTCGGTACGGTA…	GAGCAAGAATTAATAGCGACTTTTAGAAATCAGAGTTCTACTAAATATTTTGTAGGTTAAGATATAAAACCCATAGAAATATGACTTTCGTCGCCCTCCCATCTGAAGAATGCACATGTTGTGCTAATTTAGTTGATTTCCTTTTGCATACCTGACATTTTTCGAAGACTGTTTTTTCAATTAAAAGAAGGATGTAAAGGTGCACTCAGCAAGATACATAATTCAGTGGGGTGTGTGGGTGAGGAATTTTTTTTTTTTTTTTTTTTTTTTGTTTTTATCTTTTGAAAAGGAAGAGCTTGATTTTGGCTGCTCCCGCTCTGTTAGTGGTTACGACCACACCCTTCACAATTTTCTCATTATACCGTCATTCTCCGCCGAGCGGAAATGCCCTCGGTACGG…
RPL34A	S_Mikatae	0.913159	0.0132561	GAGCAAGAATTGACAACGTCCTTTAGAAAATACCTTTCTATAAAATATTAAATAAGTTACAATATAAAGTCCTCGTAAAATATTACTCCTATTGCCTTCCTCTCTGAAGAATCCGAATGTTTTATTAATCATAGTGCCTTTCTTTAACGGGTCTGGTGCTGTTTCAAGACTGTCTCAATTAAATAGTTTGGGTGTAAAGGTGCATTAAATTATACGTCCCAAATGTGGTATGTATGGGCGTATAATTGTGCTTCTTTTTTCCCACTTTTTTTTTTTTTTATTTTTTTTTCTTCTGGAGAAAACGAGCTTGAGTTTGAGAGAGCCCGTACTGGGGATTACGGCCTCCTTCTCTATTATTCTCTCATTGGATTGTTACTTTCTGGTGAATCTTGATGACCT…	GAGCAAGAATTGACAACGTCCTTTAGAAAATACCTTTCTATAAAATATTAAATAAGTTACAATATAAAGTCCTCGTAAAATATTACTCCTACTGCCTTCCTCTCTGAAGAATCCGAATGTTTTATTAATCATAGTGCCTTTCTTTAACGGGTCTGGTGCTGTTTCAAGACTGTCTCAATTAAATAGTTTGGGTGTAAAGGTGCATTAAATTATACGTCCCAAATGTGGTATGTATGGGCGTATAATTGTGCTTCTTTTTTCCCACATTTTTTTTTTTTTATTTTTTTTCTTCTGGAGAAAACGAGCTTGAGTTTGAGAGAGCCCGTACTGGGGATTACGGCCTCCTTCCCTCTTATTCTCTCATTGGATTGTTACTTTCTGGTGAATCTTGATGACCTT…
RPL34A	S_Bayanus	1.08873	0.0360399	AAGCAAGAATAAATAGCTTCCATTGTATGTAAAATTTTTACTGTTTTTTTTTTTACGTTATAGCATTAAGTTCATAGAGATGTAACTCTTGTCGTTATTGCCTTTTAAGAATTAAACATATACATTACTGTTCAGGGTATGATTGATACATCTGATATTTTAGTAGACTGTTTCTCATTTAAAGAGTAGGGTGTAAAGGTGCGACAGTAATAAATATAAATGTATTGCTGTGCATGGGTGTATTAGCTTGCATTTTATTTTTGAAATTTTCGGTTTAGTGAAACGAGGAAAATATCTTTTAGCGGTGCCGTTTTGGCGGTGGTTACGGCCTCCTTCGAGATTTTTTCTATTGGGCTGGGATTCTCCGCTAAAGCAAATGCCGTGGGTATGTTCGCGGGC…	AAGCAAGAATAAATAGCTTCCATTGTATGTAAAATTTTTACTGTTTTTTTTTTTACGTTATAGCATTAAGTTCATAGAGATGTAACTCTTGTCGTTATTGCCTTTTAAGAATTAAACATATACATTACTGTTCAGGGTATGATTGATACATCTGATATTTTAGTAGACTGTTTCTCATTTAAAGAGTAGGGTGTAAAGGTGCGACAGTAATAAATATAAATGTATTGCTGTGCATGGGTGTATTAGCTTGCATTTTATTTTTGAAATTTTCGGTTTAGTGAAACGAGGAAAATATCTTTTAGCGGTGCCGTTTTGGCGGTGGTTACGGCCTCCTTCGAGATTTTTTCTATTGGGCTGGGATTCTCCGCTAAAGCAAATGCCGTGGGTATGTTCGCGGGC…
RPL34B	S_Cerevisiae	1.34695	0.0531698	AGGATTGAAACTTCTTTACTGCCTTTTTTCCACTTGCGATACCGAGGAGTGTACATTTATAAACATTTTAGTAGCATTCTTTAGCGTATATAAGATTTTAACTAAGAAAAGAAACGAATTTACGGAGTTTCAGAATCAGTTTCTTGCCGTTGTAGAAAATGTGAGGGGAGTTTCCCTCTACTTGTATCAATGTTACAAGACAGGGGTAGAAACCTATTACGTGTTGGAACTTATTTTCTTGAACACTCTAATCATAAATTCTAAAAAACTGTGACTGTGTTTTCGTCACAACTTTGCGGTGTACAGATGTCGTCACATACCGTGTGTTGTTTGGGTGTTTTCCTTTCAGCTTTTTTTTTTTTTGAATTTTTGAATTTTTACTTTCATTTGCTTTCGGAG…	AGGATTGAAACTTCTTTACTGCCTTTTTTCCACTTGCGATACCGAGGAGTGTACATTTATAAACATTTTAGTAGCATTCTTTAGCGTATATAAGATTTTAACTAAGAAAAGAAACGAATTTACGGAGTTTCAGAATCAGTTTCTTGCCGTTGTAGAAAATGTGAGGGGAGTTTCCCTCTACTTGTATCAATGTTACAAGACAGGGGTAGAAACCTATTACGTGTTGGAACTTATTTTCTTGAACACTCTAATCATAAATTCTAAAAAACTGTGACTGTGTTTTCGTCACAACTTTGCGGTGTACAGATGTCGTCACATACCGTGTGTTGTTTGGGTGTTTTCCTTTCAGCTTTTTTTTTTTTTGAATTTTTGAATTTTTACTTTCATTTGCTTTCGGAG…
RPL34B	S_Paradoxus	1.41313	0.0250208	AGGTTTGAAACCCTTGCTTGCCCTTTTTCGTCTGTGATACTGAGAAGTGTACTTTTCATACATTTTATTAGCATTCTTTAGCGTATATAAGATATAACTAAGAAAAGAAAATGAAACTGACGTAGTTTCAAAACCCGTTTCTTATCATTGTAGAAAATGAAAAGGCATGTTTTCTTTACTTCCACCAATGTGTCAAATAAGGGTAGGTAACCTAATATAATGCAACTTATTCATCATACACTTTAAGCGTAACTTCTATAATGAAAGAACAATGACTGCTTTTTCCAGAAGACTCTGTGGTGTACATATCTCAATATATGTTATGCGCGGTTTGGGTGTTTTCCTTCCAGGATTTTTTTTTTGAAATTTTTTTACTTTCCATTTGTTTTCGGAGCTTCT…	AGGTTTGAAACCCTTGCTTGCCCTTTTTCGTCTGTGATACTGAGAAGTGTACTTTTCATACATTTTATTAGCATTCTTTAGCGTATATAAGATATAACTAAGAAAAGAAAATGAAACTGACGTAGTTTCAAAACCCGTTTCTTATCATTGTAGAAAATGAAAAGGCATGTTTTCTTTACTTCCACCAATGTGTCAAATAAGGGTAGGTAACCTAATATAATGCAACTTATTCATCATACACTTTAAGCGTAACTTCTATAATGAAAGAACAATGACTGCTTTTTCCAGAAGACTCTGTGGTGTACATATCTCAATATATGTTATGCGCGGTTTGGGTGTTTTCCTTCCAGGATTTTTTTTTTGAAATTTTTTTACTTTCCATTTGTTTTCGGAGCTTCT…
RPL34B	S_Mikatae	1.403	0.0319444	AGGTTTTCAATTTTTCCCCCCTTCTTTTCACCTGTAGTACTAAAGAATATACTTTTTATATATGACGGTGGTATTCTTTAGCCTATGTAAGATATAACTAAGAATGGCAACACAAAAGTGGTGTAGTTTCAAGACCAGGCTCCTAACATTGTGAACAAATGAGAGGATGATTTGCTTTATTTTGCTCGAATTTCCCAGAATAAAATAGTGTCGTACGTAACATAAGACATACGAGATATTTTAAATATATGTTTCAACGCAACTTCCAACAAGACAGTGAAACTATTGACTGCGTTTTCCATTTAAATCTGTGGTGTACGTATTTCATGTGTATTCCTGTAGTGTTTGGGTGTTTTGTTTTTTTTTATTTATTTTTTAATATCATCTACACAACGGTAT…	AGGTTTTCAATTTTTCCCCCCTTCTTTTCACCTGTAGTACTAAAGAATATACTTTTTATATATGACGGTGGTATTCTTTAGCCTATGTAAGATATAACTAAGAATGGCAACACAAAAGTGGTGTAGTTTCAAGACCAGGCTCCTAACATTGTGAAAAAATGAGAGGATGATTTGCTTTATTTTGCTCGAATTTCCCAGAATAAAATAGCGTCGTACGTAACATAAGACATACGAGATATTTTAAATATATGTTTCAACGCAACTTCCAACAAGACAGTGAAACTATTGACTGCGTTTTCCATTTAAATCTGTGGTGTACGTATTTCATGTGTATTCCTGTAGTGTTTGGGTGTTTTGTTTTTTTTTATTTATTTTTTAATATCATCTACACAACGGTAT…
RPL34B	S_Bayanus	1.34845	0.0336529	TGGTCTCAACCTTTGTGTCCCTTTTTTTTTTTTCATCTACGGGTAGGAGAAGATATACTATTTATACATGTTGGTAGCAAATCTTTAGCGTATATAAAACATAATCTAAAAACGAAAACACAAGCTATGTAATTCTTAAAGCCTCAGTCCCACGATTATATATCACACGGACACGCAACCCTTTATGTTTGCTCAAACTTCCTTAATTATCGCGTGTGTAAGGCAATGGAACTTACTTTAATTAGCGAGGTATCTCCCAACACTTTGCTAAGACGGTACTTGTCATATTAGACATGTGGTGTACAGATGTTTTTTATAGTAATGTACTGTGTGGGTGTTGTGCATTTTTTTTTTCTTTTCAGTTTTGTTTTTCCTGTTATTTTTACTGCGCATTACGAC…	TGGTCTCAACCTTTGTGTCCCTTTTTTTTTTTCATCTACGGGTAGGAGAAGATATACTATTTATACATGTTGGTAGCAAATCTTTAGCGTATATAAAACATAATCTAAAAACGAAAACACAAGCTATGTAATTCTTAAAGCCTCAGTCCCACGATTATATATCACACGGACACGCAACCCTTTATGTTTGCTCAAACTTCCTTAATTATCGCGTGTGTAAGGCAATGGAACTTACTTTAATTAGCGAGGTATCTCCCAACACTTTGCTAAGACGGTACTTGTCATATTAGACATGTGGTGTACAGATGTTTTTTATAGTAATGTACTGTGTGGGTGTTGTGCATTTTTTTTTTCTTTTCAGTTTTGTTTTTCCTGTTATTTTTACTGCGCATTACGACA…
RPL35	S_Kluyveri	1.07105	0.0236728	ATGGTATAACATTGTAAAAAAAATAATGGTTATGAATTATTGAGAATTGAAAAACAACACGGAAGAACACGAAGCCATTTTAAACAACGCTGAAACGAAGCGTCAATGAGTTTTTTTTTTGTACCGCCCTATCTTATTTTTTGTACTGCCCTATCTTATTTTCTTTTTTTTTAAATGAACACCTAGCAATACAACTGTTATTTAGCTGCTATTGGCTTATACAGCATCCTAGGAAAGCATTTTATGTATACTTTTAAAATATTTTTTTATTCTCTAATATTTCGGAAGTGATTAAAAAAAAAAAGGTTTAAAGTACTCACCTTTTCTAAGGCGTTGATGTGCGCTCAACTTTGAGGTAGCTGAAACTTAGGGATTTTCATACTGCCAGTATACACAGAT…	-
RPL35	K_Lactis	0.890436	0.0219934	AAACATTGCAAGAGGGTAGGAATGACAGATAACGAAACGAGACTCGAAATTAATTAAACCACAAACTCAATTTCCTTCGGATATCAGTTCAAAAAACCCTCGATTTTTGCATCGAGATCATTGAATGAAAAGAACATAATAAACATACTCGGGAACCGCATCAAATTCTTCATTCGTACCAGTGACAATGACAACATATCTACATGAAAACTGAAGCGAAAATAAAGGGATTTCGAATAAGAATTATCAATAAAATATCTTTAATCATGCACATTAGTGGATAACACTGATTGATCATCCTCTTTTCTGATTTTGGTCCCCTTATTGTTTATTATCTTCTGCTTCTCGTCATTTTCTGTTTATCTTACAATATCGTTATATCATATATATACTTTAGGT…	-
RPL35A	S_Cerevisiae	1.43845	0.0897942	TCTAGAATATGGATCAAATACGCTTGTATAAACTAAATGAAACATAAAGATTAAGAACTTAAGAGGCCAACGTCGATGGATTTATTGACGATCACCAGCCAACACATATAGATTTTAGTGTAAAAGCAATAAAAACCAAGATAATAAAATAAAAAAATACTGAAGAAGCCTAACTAGTATAAACTACTTTAACTAATAATGGCAATTTGATATAGAAACAAAGAAACATGATATATTTAGGATATTATACAACGCATTTTCATTTGTTTTACAGCACCCCTGCGTGAATCATATATTGACGTTTCGCTCTCAGGTCCACCGTGTTCTCAAAAGATACTTTTAAAACCTAAAACACACGAAATCATATTATGATAATTCAGAATGATAGTGTGGTACTGT…	TCTAGAATATGGATCAAATACGCTTGTATAAACTAAATGAAACATAAAGATTAAGAACTTAAGAGGCCAACGTCGATGGATTTATTGACGATCACCAGCCAACACATATAGATTTTAGTGTAAAAGCAATAAAAACCAAGATAATAAAATAAAAAAATACTGAAGAAGCCTAACTAGTATAAACTACTTTAACTAATAATGGCAATTTGATATAGAAACAAAGAAACATGATATATTTAGGATATTATACAACGCATTTTCATTTGTTTTACAGCACCCCTGCGTGAATCATATATTGACGTTTCGCTCTCAGGTCCACCGTGTTCTCAAAAGATACTTTTAAAACCTAAAACACACGAAATCATATTATGATAATTCAGAATGATAGTGTGGTACTGT…
RPL35A	S_Paradoxus	1.15464	0.0350927	TCTAGAATATGGATCAAATACGCTTGTATAAACTAAATGAAACATAAAGATTAAGAACCTAAGAGGCCAACGTCGATGGATTTATTGACGATCTCCAGCCATCACATATAGATTTTAGTGTAAAAGCAATAGAAACCAAGAAAAATAGAACAAAAAAAAAAGCTGAAAAAGCCTAATTAGTATAATGCTACTTTAACTAATAATGGAAATTTGATATAGATACAAAGAAACATGATATATTTAGGATATACAATATACAATGCCCTTTTCATTTGTTCTATTGCCCCCCTGAGTGAATCACATACAGAGGTTTTGCTGTCAGGTCCATTGTACTCGCAAAGATATTTTTAAGAACCAGAACACAGGAAAAACTGTATGTTGATAATTCAAAAATGATGC…	TCTAGAATATGGATCAAATACGCTTGTATAAACTAAATGAAACATAAAGATTAAGAACCTAAGAGGCCAACGTCGATGGATTTATTGACGATCTCCAGCCATCACATATAGATTTTAGTGTAAAAGCAATAGAAACCAAGAAAAATAGAACAAAAAAAAAAGCTGAAAAAGCCTAATTAGTATAATGCTACTTTAACTAATAATGGAAATTTGATATAGATACAAAGAAACATGATATATTTAGGATATACAATATACAATGCCCTTTTCATTTGTTCTATTGCCCCCCTGAGTGAATCACATACAGAGGTTTTGCTGTCAGGTCCATTGTACTCGCAAAGATATTTTTAAGAACCAGAACACAGGAAAAACTGTATGTTGATAATTCAAAAATGATGC…
RPL35A	S_Mikatae	1.50821	0.0412281	TCTAGAATATGGATCAAATACGCTTGTATAAACTAAATGAAAAATAAAGATTAAGAACTTGAGAGGCGAACGTCGATGGAATTATTGACGATCTCCAGCCATCACATATAGATTTTAGTGTAAAAGCAATAAAAAACCAAGAAAAATAGAACGAAGACCTAAAAAAGCTTAACAAGTATAATATTACTGTCACTAATAATGGAAATTCGATAAAGACACAAAAAAACATCAAACATAAATATATAAGATATACAATATACAATACACTTTTTAATTGTTCTATCGCGCCTCTAGGTGAATTTACACATAAAATTTTGGTTATCGAGTTCACTGTGTCGTCAATAGATACTTTTAAGGAGTACTGGCGTGGTAGCAGAAGATGAAATCAGAATAAAATGT…	TCTAGAATATGGATCAAATACGCTTGTATAAACTAAATGAAAAATAAAGATTAAGAACTTGAGAGGCGAACGTCGATGGAATTATTGACGATCTCCAGCCATCACATATAGATTTTAGTGTAAAAGCAATAAAAAACCAAGAAAAATAGAACGAAGACCTAAAAAAGCTTAACAAGTATAATATTACTGTCACTAATAATGGAAATTCGATAAAGACACAAAAAAACATCAAACATAAATATATAAGATATACAATATACAATACACTTTTTAATTGTTCTATCGCGCCTCTAGGTGAATTTACACATAAAATTTTGGTTATCGAGTTCACTGTGTCGTCAATAGATACTTTTAAGGAGTACTGGCGTGGTAGCAGAAGATGAAATCAGAATAAAATGT…
RPL35A	S_Bayanus	1.17688	0.0148257	TCAAGAACATGTATCACATACGCTTGTATAAACTAAATGGAAAATTAAGATTAAGAACGAAGGAGGCCAAAGTCGATGGATCTATTGACAGTCTTGAGCCACCACATATAGATTTAGTGTAAAAGCAATAAAAAACCAAGAAAAGAGAACGAAAAATAGAACTGAAAAAACCTAGTATAATACTACTTTAACTATTAAAAATATAAAGCTGATATAAATACAAACAGATATATCATATATTTAGGACACGAAATATGCGATGCGCTAATCATTTGATCTATCGCCCCCCTAGAGTCGATTTACGTATGAAAACGTTGCTATTTCGTTAACTGAGCTTTAAAAATTTTTACAGAAAGCGAAATTCACCCAATCCTTAGATCAAAACTTAGTAACCATATT…	TCAAGAACATGTATCACATACGCTTGTATAAACTAAATGGAAAATTAAGATTAAGAACGAAGGAGGCCAAAGTCGATGGATCTATTGACAGTCTTGAGCCACCACATATAGATTTAGTGTAAAAGCAATAAAAAACCAAGAAAAGAGAACGAAAAATAGAACTGAAAAAACCTAGTATAATACTACTTTAACTATTAAAAATATAAAGCTGATATAAATACAAACAGATATATCATATATTTAGGACACGAAATATGCGATGCGCTAATCATTTGATCTATCGCCCCCCTAGAGTCGATTTACGTATGAAAACGTTGCTATTTCGTTAACTGAGCTTTAAAAATTTTTACAGAAAGCGAAATTCACCCAATCCTTAGATCAAAACTTAGTAACCATATT…
RPL35B	S_Cerevisiae	0.618577	0.0273451	AGTCATGCGGACCTTGTGTGTTTTGTTTCTAGATTGTTTTATTTTTATGATTGTTGAAGATATAAACCACTGTATAGTTGTATAAGATAGGATAATGATGGTGCACTGAAAATAAACTTACTAGCTCTTTAATATTGCAACGGCTTGTAACGGGCGCCATGATGACATTCAGAATTATACCACTACTATATGAAAAAATGAAAAGAGGCCCTGCTTTGAACCCGTACATTTTATTCTATAATATTGCATCTGTGGTTTGCCTGACGGCAGCGAGTCCAACACAAAGTCTGGCATATGCTACGAATTTTCCACCATGGATTCAGCACCCAAACATTTGAATTTTTTTTCATGTCGATTGTGAAATTTTACTGAAGATGAGGGTAAATAGAGGCCTGCAAT…	AGTCATGCGGACCTTGTGTGTTTTGTTTCTAGATTGTTTTATTTTTATGATTGTTGAAGATATAAACCACTGTATAGTTGTATAAGATAGGATAATGATGGTGCACTGAAAATAAACTTACTAGCTCTTTAATATTGCAACGGCTTGTAACGGGCGCCATGATGACATTCAGAATTATACCACTACTATATGAAAAAATGAAAAGAGGCCCTGCTTTGAACCCGTACATTTTATTCTATAATATTGCATCTGTGGTTTGCCTGACGGCAGCGAGTCCAACACAAAGTCTGGCATATGCTACGAATTTTCCACCATGGATTCAGCACCCAAACATTTGAATTTTTTTTCATGTCGATTGTGAAATTTTACTGAAGATGAGGGTAAATAGAGGCCTGCAAT…
RPL35B	S_Paradoxus	0.529166	0.0274929	AGTCATGCGGACCGTGTGTGTTTTGTTTCTAGATTGTTTTTATTTTTATAATTGTTAAAGATATAAACCACTGTATAGTTGTATAAGATAGGATAATGAAGGTGCACTGAAAATAAACTTACTAGCACTTTAATACTGAAGGGTTTGCCTCTTGTAATGAACGACATGGATGACACTCGGAATTGTGGTACTGTGAGAAAAATGAAGTAAGGAGGCCTGTTTTGAACCCGTACATTTTAGACTCTATCATTGCATCTTTGGTATGTGTTGCCGCACAAAGACGAACGCAAAGCCTGGTATATCTTACGAAGTTTTCAATACGGGTACAGCACCCAAACATTTGCAGTTTTTTTTTCATGTCAATTGTGAAAGTTTACTGAAGATGAGGGTAAATAGTGG…	-
RPL35B	S_Mikatae	0.923054	0.018657	AGTCATGCGGACCGCGTGTGTTTTGCTTCTAAATTGTTCTTATTTTTTATAATTGTTAGAGATATATACCACTGTATTGTTGTATAAGATAGGATAATGAAAGTGCAATGAAAATAAATATACTAACAACTTATTATTGAAGGGTTTCTTTTGCTTCAAATAGCGACATGTTGACACTCGGAATTATGTCACAAAGGAAGACAAGGAAATGAAGCCTGTTTTCCTTTTAAATCCGTACATTTCGTAGTAGAAAATGCACTTCTTGACTTGTTTGGCCGCATTAAGGCCAACGAAAATACCAGCTGTATTATGAATTTTCACTTTAGGTAATAGCACCCAAACATTTGTTACATTCTTTTTTTTGGTATTGGTGGTGAAATTTCATTGAAGATGAGGGTA…	AGTCATGCGGACCGCGTGTGTTTTGCTTCTAAATTGTTCTTATTTTTATAATTGTTAGAGATATATACCACTGTATTGTTGTATAAGATAGGATAATGAAAGTGCAATGAAAATAAATATACTAACAACTTATTATTGAAGGGTTTCTTTTGCTTCAAATAGCGACATGTTGACACTCGGAATTATGTCACAAAGGAAGACAAGGAAATGAAGCCTGTTTTCCTTTTAAATCCGTACATTTCGTAGTAGAAAATGCACTTCTTGACTTGTTTGGCCGCATTAAGGCCAACGAAAATACCAGCTGTATTATGAATTTTCACTTTAGGTAATAGCACCCAAACATTTGTTACATTCTTTTTTTTGGTATTGGTGGTGAAATTTCATTGAAGATGAGGGTAA…
RPL35B	S_Bayanus	1.04854	0.0231847	CCTCATGCGGACCACGTGTGTTTTGTTTCTAGATCGTTTTTATTTTTATAATTGTTAAAGATATAAACCACTGTATAATTGTATAAGATAGGATAATGGAAGTGCACTGAACATATCTACTGAGATTTCATCATTGCGAGAAAGTGCCTTTTGGAATGATATAATGTTAATTGAGAATATGTGCTGGATCGAAGAAACTAAAGCGGCAACTGGCATTCCTACTTTGCACCCGTACATTTCTTTTGTTCCCCGCTCAAAGGGACTGTTTTGCGCGCGCAAAGACCGACGCAAAGCTCGGCATGCCGTGGATTTTTCACCAACAAGTGCTGCACCCAAACATTTACGGCTTTCACGTTTTTTTTTTCACATCAATTTGTGAAATTCTCTCGAAGATGAGGG…	CCTCATGCGGACCACGTGTGTTTTGTTTCTAGATCGTTTTTATTTTTATAATTGTTAAAGATATAAACCACTGTATAATTGTATAAGATAGGATAATGGAAGTGCACTGAACATATCTACTGAGATTTCATCATTGCGAGAAAGTGCCTTTTGGAATGATATAATGTTAATTGAGAATATGTGCTGGATCGAAGAAACTAAAGCGGCAACTGGCATTCCTACTTTGCACCCGTACATTTCTTTTGTTCCCCGCTCAAAGGGACTGTTTTGCGCGCGCAAAGACCGACGCAAAGCTCGGCATGCCGTGGATTTTTCACCAACAAGTGCTGCACCCAAACATTTACGGCTTTCACGTTTTTTTTTTCACATCAATTTGTGAAATTCTCTCGAAGATGAGGG…
RPL36	S_Kluyveri	0.847651	0.0104727	AACAAAGATAGTTTTTTTTAGTGCCGGGTACATAACAGGCAGTTGAACAAAATACATCTTTTCGCAATAATAGCTGTTTGCGGAACAATTAAAAGAGCACAGTATTCAATCTAGGCATAGCTCAGCTGTTCACTTAGTTCATTCACCAGGTCAAACCGGTGGTTTACAAATCTATCTTCACATGCAACCATTCATGAGTCTTTTTCCATCTACTAACGGAATCAACCAGTTTTAGATATTTCTTCATTATTTTTTATTTTTTCCTAGCAATGAATCTTAATCGAATTTGAACCCTTCCAAGGTTTATCCATAGTTGTTTTTGTTACTTTAAATTAATAAGAAGACTTGAGAAAAGAACTATGGTTAACGAGTCAAACCCTACTGTACTTCTCGATGTAT…	-
RPL36	K_Lactis	1.21202	0.0427732	GAACTGAATAGATTTTGTTCCAATTTTATATAAAAGCTTGTAAACAATGAGAAAATAGATTCTACCATGAGCTGGGAGGATGCTTGAAGACTATGCGTTAGTTGTCCGACTGACCGATGCAAGAGTTAATCACCCACTGTTCAATTGAATTGAACGGTGTGCATGTGACTGTTGCACCCAGACATTATTGACTGTTGCACCCATACATACTCAATTTCTGCTGAAAATGAGAATGTTTCCATACTAGGAAATTATTTTCTCATGTCCACCAAATCCGCTGAGCTGACGGTAGGATGCACAGACACATCCCATCCGTCTTCGTTGCTTGCTTCGAGCTGGGCAGGGCCTGTCCCGTTTCCTCCCTAAGCTGGACTGCCCGGTCTGGGCCTGGACATTCCA…	-
RPL36A	S_Cerevisiae	0.919707	0.00468441	AGGAAGAAATAAAGAAGATAATTGCCATTCCGAAAATATCGTTGGTTTTCCCCTGTATATAAAAAAGCATATCTGTTTGTACATATGTAGGTATGCACACATTCTGAACATTATTGATGCGTATATGCTTGCTACATTAATTGGCAATTCATTTTTTAGACTGTTTTACACCCGTACATTTCACAGTTTTTTTTTGAAGTTAAATTCCAACTGAATGGAAGCCTCCGCTCCTATGAAATTTATTTGAAATCAGAGATTTCAGGATGTTGAACAGTATAGTACTGATTTACAAGTATCAAAGAAACAAGAAAGACAGCAAACACAATAAGAA	AGGAAGAAATAAAGAAGATAATTGCCATTCCGAAAATATCGTTGGTTTTCCCCTGTATATAAAAAAGCATATCTGTTTGTACATATGTAGGTATGCACACATTCTGAACATTATTGATGCGTATATGCTTGCTACATTAATTGGCAATTCATTTTTTAGACTGTTTTACACCCGTACATTTCACAGTTTTTTTTTGAAGTTAAATTCCAACTGAATGGAAGCCTCCGCTCCTATGAAATTTATTTGAAATCAGAGATTTCAGGATGTTGAACAGTATAGTACTGATTTACAAGTATCAAAGAAACAAGAAAGACAGCAAACACAATAAGAA
RPL36A	S_Paradoxus	0.348072	0.0113998	AAGAAAAAAGAAGAAGGCGATCAGCTTTCCAACAATACCGTTCGTTTCTCCTGTATATAAAAGAACATATCTGTTGTACATATATAGATATGCCTATATTCTAAACGTTACTGATGTATATGCTTGCAACATTGGTTGGCACTTTATTTACCGACTGCATTAACACCCGAACATTTTCAAATTTTTTGGAGTTAAATGCGAAAGGAAAGGAAGCCTCCGCTCCTATGAAATTTGCTAAAATTAATGATTTGAGGATATTAAACAGTATAGTACTAATTACTAATATCACAGAAACAAGAAAGACAGCAAACACAATAAAAA	AAGAAAAAAGAAGAAGGCGATCAGCTTTCCAACAATACCGTTCGTTTCTCCTGTATATAAAAGAACATATCTGTTGTACATATATAGATATGCCTATATTCTAAACGTTACTGATGTATATGCTTGCAACATTGGTTGGCACTTTATTTACCGACTGCATTAACACCCGAACATTTTCAAATTTTTTGGAGTTAAATGCGAAAGGAAAGGAAGCCTCCGCTCCTATGAAATTTGCTAAAATTAATGATTTGAGGATATTAAACAGTATAGTACTAATTACTAATATCACAGAAACAAGAAAGACAGCAAACACAATAAAAA
RPL36A	S_Mikatae	0.960182	0.00178464	ACAAACGCCAATAAAACTAATAATACAAACTTACCAAAAATGTCGTTCGTTTCGCCCTGTATATAATTAAAATAGCTGTTATGCGTACATGGACATACATATGTTTAAACCCGCTACTGGTAGGTATATGCCTGCAGCACTCGCTGATATTGTATTTTTCGACTGTCAAACACCCGAACATTTTAGTAATATTTCTGGAGTTTAATGGAAACGGAGATTGAGATCACTCGCTTCCATGAAGTCTGTTGAAAATAAAGATTTGAAGATATTAAATAAAGTTGTATTGCTCTCTAACACTAGCGAAGTAAGAAACACAGCAAACACAACAAGAAG	ACAAACGCCAATAAAACTAATAATACAAACTTACCAAAAATGTCGTTCGTTTCGCCCTGTATATAATTAAAATAGCTGTTATGCGTACATGGACATACATATGTTTAAACCCGCTACTGGTAGGTATATGCCTGCAGCACTCGCTGATATTGTATTTTTCGACTGTCAAACACCCGAACATTTTAGTAATATTTCTGGAGTTTAATGGAAACGGAGATTGAGATCACTCGCTTCCATGAAGTCTGTTGAAAATAAAGATTTGAAGATACTAAATAAAGTTGTATTGCTCTCTAACACTAGCGAAGTAAGAAACACAGCAAACACAACAAGAAG
RPL36A	S_Bayanus	1.00098	0.0159924	AGAATGACTTCGTTTCCACTTAACTAAACCTTCCAAAGATATCATTCAATTTTCCCTGTATATATATATAAGCAAAACAACTGAACGTATAGATATATGTATGTTAAAATGTCATTCATTAGTCCCTGTATGCTTACTCTACTTGCTCGTGTACATTTTTTCTGACTACTTAACACCCGAACATATTTTGGGGTTTTTTTTTCTGGAGAGGAGATGCGAACGAAAGGGAAACCGCCGCTCATATGAAATTTGTTTAATTAAAGAACTTGAAGATATTAAACAGTATAGTACTAGTTTACCAGCATTGCACAGATAAGAAGCACAACAATCGATAAA	AGAATGACTTCGTTTCCACTTAACTAAACCTTCCAAAGATATCATTCAATTTTCCCTGTATATATATATATAAGCAAAACAACTGAACGTATAGATATATGTATGTTAAAATGTCATTCATTAGTCCCTGTATGCTTACTCTACTTGCTCGTGTACATTTTTTCTGACTACTTAACACCCGAACATATTTTGGGGTTTTTTTTTCTGGAGAGGAGATGCGAACGAAAGGGAAACCGCCGCTCATATGAAATTTGTTTAATTAAAGAACTTGAAGATATTAAACAGTATAGTACTAGTTTACCAGCATTGCACAGATAAGAAGCACAACAATCGATAAA
RPL36B	S_Cerevisiae	1.50305	0.0337425	TGTATAGTTTTGCGCTGTGTGCACATTGTGTGCCTCTCCAATTTGTGTTAAAAAATGCATCACGACTCGTTTAGACAATGTTGTTGTTGTTGTTTTTTTTTTGACTGTATTTTCACCCGTACATCCACGGATGTGTTGGGTTTTTGTTTCCGCTTTACCGTGCGGGAGACGACCATGACCGAGAGGTCTGGTTGCGAAAGACGCACATACCGCGTGCGCGGAACTTTTTCATTGGGTTGCCAACCAAGGCTGTTCAGGGAAGCCCGACGAGGGAAGCTAGCATGAATGCACTAGGAGAGAGAGAGAGAGAGAGGCAGAGGAAGAGGCACATCATTGCATTTCTTGAATATTCGTTTTAATTAGCGTTAAGTCTTAAGTTCGTGTATTACCATAGTCAAA…	TGTATAGTTTTGCGCTGTGTGCACATTGTGTGCCTCTCCAATTTGTGTTAAAAAATGCATCACGACTCGTTTAGACAATGTTGTTGTTGTTGTTTTTTTTTTGACTGTATTTTCACCCGTACATCCACGGATGTGTTGGGTTTTTGTTTCCGCTTTACCGTGCGGGAGACGACCATGACCGAGAGGTCTGGTTGCGAAAGACGCACATACCGCGTGCGCGGAACTTTTTCATTGGGTTGCCAACCAAGGCTGTTCAGGGAAGCCCGACGAGGGAAGCTAGCATGAATGCACTAGGAGAGAGAGAGAGAGAGAGGCAGAGGAAGAGGCACATCATTGCATTTCTTGAATATTCGTTTTAATTAGCGTTAAGTCTTAAGTTCGTGTATTACCATAGTCAAA…
RPL36B	S_Paradoxus	1.51202	0.0205469	AGTATAGTATAGACCTTTGTGTACGGGTGTGCATCCAATTCGTGTTAAAAAACACATCATGACTTTTTAGACGAAACATTTGGACTGCCGTTTCACCCATACATCTTTTTATGTTCTGGGTTTTATTTTTTTTTCTTTATGCCTTGCAGGAGATGATCATAATCGGGTGTGAGGACGAGTGCTCGTCAGCATGGTTGCGAGAGACGCACGTACCGCGTGCGCGGAACTTTTTCATTGGATTGAGAGCTAAGGCTGCGGAGAGAAGCCCGACGGAGGAGCCAACATGAATGCACAGAGAGAGAGAGAGGAAGAGGCATATCGTTGCATTTCTTGAGTATTAGTTTTAATTAGCGTTAAATCTCAAACTCGTGTATTACCATAGTCAAAACAAAATAGAGA…	AGTATAGTATAGACCTTTGTGTACGGGTGTGCATCCAATTCGTGTTAAAAAACACATCATGACTTTTTAGACGAAACATTTGGACTGCCGTTTCACCCATACATCTTTTTATGTTCTGGGTTTTATTTTTTTTTCTTTATCCTTGCAGGAGATGATCATAATCGGGTGTGAGGACGAGTGCTCGTCAGCATGGTTGCGAGAGACGCACGTACCGCGTGCGCGGAACTTTTTCATTGGATTGAGAGCTAAGGCTGCGGAGAGAAGCCCGACGGAGGAGCCAACATGAATGCACAGAGAGAGAGAGGAAGAGGCATATCGTTGCATTTCTTGAGTATTAGTTTTAATTAGCGTTAAATCTCAAACTCGTGTATTACCATAGTCAAAACAAAATAGAGAAGC…
RPL36B	S_Mikatae	1.5507	0.0094539	AGAAAGTTTTTAAATAGATGTATAAATGTATGTGCATCCAACTATGTTAAAAAATGCATCATAACGTTTCAAAACAGATACCCTCGACTGCTTTTTCACCCGTACATTTAATTGTTTCTGGGTTTTCTTATTTTCTTTTCATTACATACCTTCTCCTCCTGGGAGGCGTCATGTGGGCGTGACGGCTACGGCCCGTCAGCCTGGCCTCAGAGGACGCACGTATCGCGCGAACGAGACCTTTTCACTTGGTTCCGGCCCACAATGTTGTAGAGAGATTCCCAACGGAGAAGCCAACTGGAATGCAGAGAGAGAGTTGGAGAGAGGCAGATCGTTGCACTTCTTAATAAGTTATTTTTAATTAGCGTTACTTTTCAAGCTCATCATTAGCATAGTCAAAAC…	AGAAAGTTTTTAAATAGATGTATAAATGTATGTGCATCCAACTATGTTAAAAAATGCATCATAACGTTTCAAAACAGATACCCTCGACTGCTTTTTCACCCGTACATTTAATTGTTTCTGGGTTTTCTTATTTTCTTTTCATTACATACCTTCTCCTCCTGGGAGGCGTCATGTGGGCGTGACGGCTACGGCACGTCAGCCTGGCCTCAGAGGACGCACGTATCGCGCGGACGAGACCTTTTCACTTGGTTCCGGCCCGCAATGTTGTAGAGAGATTCCCAACGGAGAAGCCAACTGGAATGCAGAGAGAGAGTTGGAGAGAGGCAGATCGTTGCACTTCTTAATTAGTTATTTTTAATTAGCGTTACTTTTCAAGCTCATCATTAGCATAGTCAAAAC…
RPL36B	S_Bayanus	1.61252	0.0430329	TGTATAGGATGCGATGCGTATATATATTTTTATTGTTAAAAATTACATCATGAACTCTTTCTTAAGAGAGTCCTCACGGGACTACTTTTTCCACCCGTACATTTCTATTTTTGAAAGTGTCTTTTTTTTTTCTTTCAGTTTTTTTTTTCAAATACACACTGGCGTGGGCCCAGGGGGACGCGCACACCGCGCGCGCGGAACTTTTCCATTGCGTTGTGAGACCAAGGCCGCGGGAAAAGGCCCCAGGGAAGGAAGAGCGTTGGCGAGAACTGCCTTGGATGTAGAGAGACAGAGAGCTTGTTGCATTTTTCCAAGTATTAAGTTTTAATAAGCGTTACATTTTAAGCTCGTGTATTAGCATAGTCAAAACAGAACAGAGTAGCAAGGATAATATAAA	TGTATAGGATGCGATGCGTATATATATTTTTATTGTTAAAAATTACATCATGAACTCTTTCTTAAGAGAGTCCTCACGGGACTACTTTTTCCACCCGTACATTTCTATTTTTGAAAGTGTCTTTTTTTTTTCTTTCAGTTTTTTTTTTCAAATACACACTGGCGTGGGCCCAGGGGGACGCGCACACCGCGCGCGCGGAACTTTTCCATTGCGTTGTGAGACCAAGGCCGCGGGAAAAGGCCCCAGGGAAGGAAGAGCGTTGGCGAGAACTGCCTTGGATGTAGAGAGACAGAGAGCTTGTTGCATTTTTCCAAGTATTAAGTTTTAATAAGCGTTACATTTTAAGCTCGTGTATTAGCATAGTCAAAACAGAACAGAGTAGCAAGGATAATATAAA
RPL37	S_Kluyveri	0.353068	0.0126537	TTGTGTTGGTTGTTCTTCTCTTGGGAGGGAGAAAGTGTAGTGTCAAGAGCTGAATAGAAGATTGAACAAAGTGTTTTTACCAAATGGCTCGCACAACCGAGACTGTATATCCTTTTTTTTTTTCTGTTTCTCTTCCCTTCACGTCCTTCCTCGTTTCGCTTGTCAAAACCAAGACGCGTTTTCCAAGCGAACAGGGTCGATTTTCGCGTCATGTCGTTTCGTGTTGCTCTGTTCTGTGCCCTGCTCTACATCATTAGGGCTTTTTGTTCTGTATGACCGTCTGGGTCCTTGCTTCGAGATATCGCGCCCATACATTTACTGTTCGGATCAGGAAAAAAAAGTATCGTTTCCTTGCCCTACAGGAAGACGGCCTAGAAAAAAAATGAAAAAAAAAAAAAA…	-
RPL37	K_Lactis	0.76966	0.0188361	GACCTCGTGTCTTTTCTTTCTTTGGTTTAATCTCTGTTAACGTTCAGGTGCTTCAGTTTTAACCCTTTAGAATCTGATATTAGATTTTCCAAGTAGCAGTATCTTTGTTGCCTTTCTATGACAGGACACTCCAAAAACAATACTACAGAATCGTTTTGTCTTAGATAGATGTTAATAAACGTAAAAGAACTTACTACAACCTAAAGTCTCTTCATTTCTCAACTGAATATGAACTTCATACTAACTTCAAACTACAAAATATGCGTCGCGTCGTTTCCTTGTATTTTGTCTATTTCGTAGTGGCCACTTTTCGCGTTATTCCCCAACTATCAGGACTGCTCATTTATTAAATCCGTACATCCAAGAATATTCTATACAGATAAACTAAAACTGGTGAGT…	-
RPL37A	S_Cerevisiae	1.49166	0.053494	TCTTTGATGTGTCGTGGCAGATGTATATGGACTTTTGTACGTAAAGTAGATTGCTATAATTCAATTCTAAATGAATGAAAGTAGAGAAAGAGTTTCCATTGATGAATTTTAGTTTACGTCGACTGCCGCTGTTCATTCTCATCAAAACACGAAAGCAAACCATAGAGATGAACTTAAGAAAAAAGGGCCACGGGATTTTTTTTTCGCGTTTTGGCGTTTTCATATCAAAAAAAAAAAACCATATTAACATCTGTACATTATTATTAACTAAACATCCGTACACAAAAGGTTTTCCAAGACAAAACGTTGTCGAGACTATTCTCTTTCGAAGAAATTCTAAAACACACTTCGGCAGGCCGGCAACAAGAAGGCGGCCCCTTGGGGAAAGGGAAGTCAATC…	TCTTTGATGTGTCGTGGCAGATGTATATGGACTTTTGTACGTAAAGTAGATTGCTATAATTCAATTCTAAATGAATGAAAGTAGAGAAAGAGTTTCCATTGATGAATTTTAGTTTACGTCGACTGCCGCTGTTCATTCTCATCAAAACACGAAAGCAAACCATAGAGATGAACTTAAGAAAAAAGGGCCACGGGATTTTTTTTTCGCGTTTTGGCGTTTTCATATCAAAAAAAAAAAACCATATTAACATCTGTACATTATTATTAACTAAACATCCGTACACAAAAGGTTTTCCAAGACAAAACGTTGTCGAGACTATTCTCTTTCGAAGAAATTCTAAAACACACTTCGGCAGGCCGGCAACAAGAAGGCGGCCCCTTGGGGAAAGGGAAGTCAATC…
RPL37A	S_Paradoxus	1.56749	0.0262501	TCTTGATGCGTCGTGGCAGATATATATGGACCTTGTACTCACAAGAGATCGTTGCGCTACAATTCTAAAAGAATGAAAACAGAAAAATAACTTTCCATTGATAAATTTTATCTTACTCTGACTGCCGCTGTTCATTCTCATTAAAACACGAAAGCAAACCAAATAAAGATGAACTAAGAAAAAAGGGCCACGTAATTTTTTTTCGCGTTTTGGCGTTTCATATGAAAAAGTTACCAAAATTAACATCTGTACACTATTATATTTTTATTGAACATCCGTACACAAAAAAATCTTACGATGAAAAAACGGTACCGATTCATTTTAGTAAGAAGTAAATAGCACATTCGGCCGGCTGGCGGCCAACAGGTAGACCCCCAGGGAAAAGAAATTCCCTTTGCC…	-
RPL37A	S_Mikatae	1.68585	0.0492848	TCTTTGATGTGTCTTGAGAGGTGTTTAGGGACCTTGTGTTCAGAGGATCCTTACACTTCAATTTAAAAATAAATAAAAGCAGAAAAGAGTTAACGTTCATGAATTCTAACTTATTTCTAACTGCCGCTGTTTATTCTCATCGAAACACGAAACCAAATTAAATGAAGATGAAAGGACTACCGCGTATTTTTTCGCGTTTTGGCGTTTGATATAACGAAAGATTTCCGACTTAACATCAGTACATTATTTCAGATCGAATAGCATCCGTACATCATTGAGAAAAGCAGTACTAGATCAATTCTTTCTCGACTAAAATGAAAGAACGAAGGCTGACCGGCTCGGCAGACAAGCAAGTTCCTCCTAGGATGAAAGATTTTACTTCGCTTTGTGTTTCTCTGG…	-
RPL37A	S_Bayanus	1.73948	0.0447728	GGCTTATTGTGATTATTTCTTATCCCTTTGAATGTTATGATAGAAGTTAAAGAACGGTGTATGCTAAAAGATTTAGAAGACTAAAACAAAGCTACTCGTCAACTGGTAAGTGAAAAAAAAGACCAGACTCGCCATTAATGGAGCTGGTTTGTTTTTGACTAACGTTGTTTATTCTCATCGAAACACGAAACCGAATTAAAATGGAAGTCTCTTAAAAGAAGACCACGGGACCTTTTTCGCGTTTTCGCGTTTAATCAAAAAAAAAAAGAACAAAACGGACGACTTTTCCTTAATAACATCAGTACATCTGTAAGGCGGACTTCCACCCATTCACCCACCTGAAATTTGTTAGGAAATAATTGAAGACACTTTTCTGAATGTTTGGAAAGAAACAGCGAC…	-
RPL37B	S_Cerevisiae	1.30056	0.0324975	ACGATTTTGTCGTGAAACTTCTAGCGAAAAGACTAATGAAATCGGCAAATATTGTGTAAATAGTATACCAAAAAAAAAAACGCTTCTATATATTGTTCCCCGTTGCTAGTAACGATAGAAACGGCAAATAAGGAGAGAAATTAAACTTTCTTGGGAGAGGCAGAAGTGTTTACTTATTCTTCTGAAACAAAAACAAACGCGAAAAAAAAATTATCGCGTTTGGATTATCATTATTTAGACATTAACACCTGTACATATTTGTATTTTAAAAGCCGAACATTTTTGGGTTCTATATCAGTTTTTTTTTTCTTCAAGCACTCCGTACACCACTAATATTATCACTGAGAATCTTCCTGCCACTTGCGGGAAGGATGAGATTGGAAACATGGCTGGAATAGT…	ACGATTTTGTCGTGAAACTTCTAGCGAAAAGACTAATGAAATCGGCAAATATTGTGTAAATAGTATACCAAAAAAAAAAACGCTTCTATATATTGTTCCCCGTTGCTAGTAACGATAGAAACGGCAAATAAGGAGAGAAATTAAACTTTCTTGGGAGAGGCAGAAGTGTTTACTTATTCTTCTGAAACAAAAACAAACGCGAAAAAAAAATTATCGCGTTTGGATTATCATTATTTAGACATTAACACCTGTACATATTTGTATTTTAAAAGCCGAACATTTTTGGGTTCTATATCAGTTTTTTTTTTCTTCAAGCACTCCGTACACCACTAATATTATCACTGAGAATCTTCCTGCCACTTGCGGGAAGGATGAGATTGGAAACATGGCTGGAATAGT…
RPL37B	S_Paradoxus	1.58447	0.0231824	AGAATTTTGTCATGAAATTTCCAAGGGAAAGGGAAATAAAAACAGCAAATGTTGTGTAAGTACTATGCCAAAAAATGAGCGCTTCTATATATTGTTTTCCGTTGCTAGTAACGATAAAGATGACAAATAAGGAGAAAAAAAATTAAACTTTCTCGGGAAAGGCAGAGTATACTTGCTTTGTTTGAAAGCAATCTATATGTTTACCTATTCTTTTGAAACAAAAACAAACGCGAAAAAATAGAAATAGTATCGCGTTTGTATTAAAATTGTTCAGACTTTAACACCTGTACATATTACTATTTTAAAAAGCCGGACATTCTTAGCCTTTGTTCAAACTTTTTTTTTCTTCAGGCATCCCGTACACCACAAATATTATCATTCAGAATCTTGGTGGGCTTT…	AGAATTTTGTCATGAAATTTCCAAGGGAAAGGGAAATAAAAACAGCAAATGTTGTGTAAGTACTATGCCAAAAAATGAGCGCTTCTATATATTGTTTTCCGTTGCTAGTAACGATAAAGATGACAAATAAGGAGAAAAAAATTAAACTTTCTCGGGAAAGGCAGAGTATACTTGCTTTGTTTGAAAGCAATCTATATGTTTACCTATTCTTTTGAAACAAAAACAAACGCGAAAAAATAGAAATAGTATCGCGTTTGTATTGAAATTGTTCAGACTTTAACACCTGTACATATTACTATTTTAAAAAGCCGGACATTCTTAGCCTTTGTTCAAACTTTTTTTTTCTTCAGGCATCCCGTACACCACAAATATTATCATTCAGAATCTTGGTGGGCTTTT…
RPL37B	S_Mikatae	1.265	0.0276116	AGATATTTATCATGGGATTTCAACGAAGAAAAAATAAAAAGATAAGAAGTATTGTGTATACTGTAGCGAAAATAATAGCGTCTATATATTGTGTTCTGTTGCTAGTGGTAACAAAGATGTCAACTTAAGGAGAGAAAAAATTAAACTTTTTAGGATGAGGCAGAGGTATGCTTTATTTTGTTCGAAAGCGATCTATGTGTTTACCTATTCTTCTGAAATAAAAACAAACGCGAAAACAGAATAAAAATAGTATCGCGTTTTTTACCCTTTTGCACAAATTAACACCTGTACATATTTAGTCGCTAGCATCCGTACATTAAAAGTCTTTATTCAAGCTTTTTTCAAGCACTCCGTACACCACAAATACTATCAATGGGAAAACATAATGGGCTTCTCCAA…	AGATATTTATCATGGGATTTCAACGAAGAAAAAATAAAAAGATAAGAAGTATTGTGTATACTGTAGCGAAAATAATAGCGTCTATATATTGTGTTCTGTTGCTAGTGGTAACAAAGATGTCAACTTAAGGAGAGAAAAAATTAAACTTTTTAGGATGAGGCAGAGGTATGCTTTATTTTGTTCGAAAGCGATCTATGTGTTTACCTATTCTTCTGAAATAAAAACAAACGCGAAAACAGAATAAAAATAGTATCGCGTTTTTTACCCTTTTGCACAAATTAACACCTGTACATATTTAGTCGCTAGCATCCGTACATTAAAAGTCTTTATTCAAGCTTTTTTCAAGCACTCCGTACACCACAAATACTATCAATGGGAAAACATAATGGGCTTCTCCAA…
RPL37B	S_Bayanus	1.40278	0.0195213	AAATTTTGTCACGCTACTTCCAAAAACAACCGACGGTATAATATATTAACAGTACCGCGTAAGATAGTAACAAAAAAGGACAACGTCTATATATGCTTTTCGTTGCTGATAGCAATAAACATGGTCTAATTAAGGAGAAAAAATTAAGCTTTTTCTGAGTGAAGCAGTAATATACTTTTATTTGCTCGAGAAGACATCTCTATGTTTACCAATTATTTTGAACGAAAACAAACGCGAAAAAGATAAAAATAGTTTCGCGTTTGTATTACTGTTGCTTGGCTTAAACACCTGTACATATGTGAGACTTAAACTCCGTACATATTCTCAAATCTTTTCAACTTTTCTATTTTTTTAGTTACTCCGTACACCACAAATATTATTTTTGAAAAACTTTATGGA…	AAATTTTGTCACGCTACTTCCAAAAACAACCGACGGTATAATATATTAACAGTACCGCGTAAGATAGTAACAAAAAAGGACAACGTCTATATATGCTTTTCGTTGCTGATAGCAATAAACATGGTCTAATTAAGGAGAAAAAATTAAGCTTTTTCTGAGTGAAGCAGTAATATACTTTTATTTGCTCGAGAAGACATCTCTATGTTTACCAATTATTTTGAACGAAAACAAACGCGAAAAAGATAAAAATAGTTTCGCGTTTGTATTACTGTTGCTTGGCTTAAACACCTGTACATATGTGAGACTTAAACTCCGTACATATTCTCAAATCTTTTCAACTTTTCTATTTTTTTAGTTACTCCGTACACCACAAATATTATTTTTGAAAAACTTTATGGA…
RPL38	S_Cerevisiae	1.84021	0.0504671	TGGTTTCCCCCTTATTTTACTTGATGATATTGCTCCCAGCAGATCCAAGATTTATTTTCAAGTGCTCTTGTCTCACGTATACTACGACTTCTATGAAACAAATATATGAGTAGGGAACTGAACAAAAAAGCAAATTCTTCCAATGCTCTCTAGCTCGCAGTCATGTTATGATCTCATAATCACGTCCCATTCCCGGCTTCTACGCATTTTTCCACGTATTAGCGCGATTTAAAAAAAGAAAATAGAAACAAATAGCAATAAACAAAAAGAAAAGTAACGCTATTACATCCACATGTCACAACTACTTTGTGAAGTTGCAATGCGTGATTAGTATTATAAAACATCATAGCCTTGCCAAATAAACTCGCTTCCCAGAAAAGACGCCAAATTAACTGCCGC…	TGGTTTCCCCCTTATTTTACTTGATGATATTGCTCCCAGCAGATCCAAGATTTATTTTCAAGTGCTCTTGTCTCACGTATACTACGACTTCTATGAAACAAATATATGAGTAGGGAACTGAACAAAAAAGCAAATTCTTCCAATGCTCTCTAGCTCGCAGTCATGTTATGATCTCATAATCACGTCCCATTCCCGGCTTCTACGCATTTTTCCACGTATTAGCGCGATTTAAAAAAAGAAAATAGAAACAAATAGCAATAAACAAAAAGAAAAGTAACGCTATTACATCCACATGTCACAACTACTTTGTGAAGTTGCAATGCGTGATTAGTATTATAAAACATCATAGCCTTGCCAAATAAACTCGCTTCCCAGAAAAGACGCCAAATTAACTGCCGC…
RPL38	S_Paradoxus	1.94182	0.040375	TGATTTCCCCCTTCTTTACCCGATGATATTGCTCCCAGTAGCACCAAGATTTCTTTTCAAGTGTTATTGTCTCAGGTAGACTACAACGTCTGTGAAACCAAATATATGACTAGAGAGCTGAATAAAAAGCAAAGTCTTCAGAGGCTCTCTAGCTCGCAGTCATGCTATGATCCCATAATCACGTCCCATTTCCGGGTTTTACGCATTCTTTCAAGTATTAGCGCGATTAAAAAAAAAAAATAGAAACAAATAACAATAAACAAAAAGAAAAAGAGACTTTATCACATGCACATACCATAACTACTTTGTAAAGTTGCAACACGTAGATAGTATTCGAAAACACCACGATCTTGCTAGTAAACTTCCTTTCCAGACATGATGTCAAATACCGTCTGTTAC…	TGATTTCCCCCTTCTTTACCCGATGATATTGCTCCCAGTAGCACCAAGATTTCTTTTCAAGTGTTATTGTCTCAGGTAGACTACAACGTCTGTGAAACCAAATATATGACTAGAGAGCTGAATAAAAAGCAAAGTCTTCAGAGGCTCTCTAGCTCGCAGTCATGCTATGATCCCATAATCACGTCCCATTTCCGGGTTTTACGCATTCTTTCAAGTATTAGCGCGATTAAAAAAAAAAATAGAAACAAATAACAATAAACAAAAAGAAAAAGAGACTTTATCACATGCACATACCATAACTACTTTGTAAAATTGCAACACGTAGATAGTATTCGAAAACACCACGATCTTGCTAGTAAACTTCCTTTCCAGACATGATGTCAAATACCGTCTGTTACT…
RPL38	S_Mikatae	1.89116	0.0488638	TTTGTCCCTTAATTACTTTAGTGATATTACACCTGGCAGCAGCAAGCTTCTTTATTTATAGCTATATCCTCACGTTTGCTAGAACGTCTATGAAAATGAGATATATGACTAGGTAGCAAAGCTAAAAGAGGATTCTTTCCGGTCCCTCTGGTTCGCACTCACATCATGATCTCATAGTCACGTCCCCTTCCGGAATTGACGCATTCTTCCAAGTATCAGCGCGATTTATAGAAAGAAAATAGAAACAATAATAAACAAAAAAGAAAAGAGAGAGATATCACACGTAGACATGACGCAGCTCTTTAGTGGAATGGAAACGCGCAACCAGTATTCTAAGAAGACACGATCTTATCAATGAGTCTTTTTTAAAAGCGAAGGGTAAATAGTTTCCATCACTTA…	-
RPL38	S_Bayanus	1.60161	0.0381403	TGCTTTCTCCCTTATAATCTTAATGATGTTTATTGGTCTTGGTAATGCCAAGACTGAAAGTTTATATCTTTTTTTTTTTATATTGACCCCTTAGATGTAGTATAGATCAAACGAAAAACTGAAATACATAAAATAAAGAAGTAAATAAAAAACTCTTCTGTCGCTTGTCTACTTCGCAGTCATGCAATGATCTTATAATCACGTCTTCCTTTCCGGGTTTTACGCAGGTTTCCAAGTATTAGCGCGATTTAAAAATAAAAACAAAAACAAACAATAAATAAACAAGCAGGAATGGAAAAGGTTGTTTCACCAACCGCAAATTTTGTTTACTGGGACTGAAACACGCAATGCCCATTCAAGTTGCTATGGTGTTTCCAGCACAGGTAAGTTTTTGAAATT…	TGCTTTCTCCCTTATAATCTTAATGATGTTTATTGGTCTTGGTAATGCCAAGACTGAAAGTTTATATCTTTTTTTTTTATATTGACCCCTTAGATGTAGTATAGATCAAACGAAAAACTGAAATACATAAAATAAAGAAGTAAATAAAAAACTCTTCTGTCGCTTGTCTACTTCGCAGTCATGCAATGATCTTATAATCACGTCTTCCTTTCCGGGTTTTACGCAGGTTTCCAAGTATTAGCGCGATTTAAAAATAAAAACAAAAACAAACAATAAATAAACAAGCAGGAATGGAAAAGGTTGTTTCACCAACCGCAAATTTTGTTTACTGGGACTGAAACACGCAATGCCCATTCAAGTTGCTATGGTGTTTCCAGCACAGGTAAGTTTTTGAAATTT…
RPL38	S_Kluyveri	0.423343	0.0117468	CTGTTTTCCATGGAGGATGTAACATCCGTACATTTAAATATTTTACTTGTATGCATCTTTACTTCATACGAACATCCATACATTACGAAATATATACTTTTTTACAATAAGAAAATGAAACAGGGATGTAAGCGGCACACGGATTCCGTACCGACGCAGCGCGAGCGGTGGCCCTGCTCACCAAAAGTTTCACAGCTCTAGCCGTTGTCTTGAAGATAGCGAAATTTGGCCCTTTGGAATAGGAGAAGGATCTCACTTCAAAGACATTATCGCACA	-
RPL38	K_Lactis	1.13096	0.0202782	AACCCTTCAAACATAGTATATATATATATATATATATATATATATACACATAATCATGCCCCACCGGTTATCTAGTAAATGAATGGATATCTTATTCATGATGCTGGCATGTCTAGTCCTGTGATGTATTCTTGTGACCTGAACCAATAGTAGGATTAAAGAATTCAAATCACGTGATTAACAAAGGACTGTCCATTGTTAAAATAACACCCATACACTCCAAACACTGAAAAATAAAAACCCACACATCCGGATACAAAACGAGAAAATTCTCAATTGGGTAGTATAATACTCAAAGAAACCCAAAAAATCTCTAAAAGCCAACCTCCTGACACCCACACACCATCAACTAAACTTTTCACCAATCTCATCGACTGTGCTCATTGAGTATTGTGCAAT…	-
RPL39	S_Cerevisiae	2.1092	0.041335	ACTAGAACTGAAAGGCCATTAAAAAACCTTACAATTTAAGAATTGAATAGTCGATTAAGATTATTTAGATTGAAATTGACTAACTGCAAACCCATATTCAAGAATTATTTCACATCTTCCAGCGAGTAAACATGCCGCTGGTAATCGCGCGTCCTCAATATTTGAGTTTTTCAAATAGTGAGGTGTGGATGTATAGAGGAATTACACACTTTTAAGTATGTGATGTATGGGCGCACAGTACCAATTTAACTTTTTTTTTTTTTCATTTTTTAGCTTGATTTTCAAAAAACTTATGGGCGTTTTAGGCTCCGGCTCAAACTACCACCACCACGCGGCAGGCCGAGGCAAACAGTACGCCTTGGCGGGGACGCCGAAGCGACTCCTTCTGTTCCAAGCTCA…	ACTAGAACTGAAAGGCCATTAAAAAACCTTACAATTTAAGAATTGAATAGTCGATTAAGATTATTTAGATTGAAATTGACTAACTGCAAACCCATATTCAAGAATTATTTCACATCTTCCAGCGAGTAAACATGCCGCTGGTAATCGCGCGTCCTCAATATTTGAGTTTTTCAAATAGTGAGGTGTGGATGTATAGAGGAATTACACACTTTTAAGTATGTGATGTATGGGCGCACAGTACCAATTTAACTTTTTTTTTTTTTCATTTTTTAGCTTGATTTTCAAAAAACTTATGGGCGTTTTAGGCTCCGGCTCAAACTACCACCACCACGCGGCAGGCCGAGGCAAACAGTACGCCTTGGCGGGGACGCCGAAGCGACTCCTTCTGTTCCAAGCTCA…
RPL39	S_Paradoxus	2.14712	0.057178	ATTGATTTCAAAAGCTAATAAAAAAATATTGCAAATTAAGAATTTAAGATAGTCAATTAAGATTATTTAGATTGAAATTGGCTAACTGCAAACAGATATTCAAGAATTATTTCACATCTTCCAGTGAATAAACATGCCGCTGGCAAACGCGCGTCCTCAATGATTTATTTTTTAAACAGTGGTGTGGGGATGTAAAGAAGAATTATACGCTTCTAGATATGGTATGTATGGGTGGACAGTACCAATTTGTTTGCTTTTTTTTCATTTTTTTTTGTGAGATTTTCAAAAGATTCGGCGCGTTTTAGGCTCAATCAACTTTCAACTGTTTCGGTTCAAACTACTACCACCAGGGGGGCGATCCTTAGGCAGACCTTACGGCACCGACGCGATCCTTACTGT…	-
RPL39	S_Mikatae	2.09272	0.0321975	AATATGACTTTAACACTAATAAAATACAGTTAACTAAGAACTGAAGTCAATCAATTAAGATTGTTTAGATTAAAATTGGCTAACTGCAAACCGGTATTCAACAATTATTTCATATTTTCCAGTGACAAACATGCCGCCCGTCAATGCGCGTCCCTCACTGTTAAATTTTAAGTCTTGTGGTGTATGGAGGTAAAGCCAAAAAAGTACATTTATCTATGGTGTGTATGGGTGAAAAGTACCAACTTTATTGCTATTATTTGATATTTTCTGGAATTGTTTCAAAAAATCGGCCCGCTTATTGCTTTAGCGAGATTTTAACAGTGTCGGCCTACACATTTTGTACTAGTGGGAAGCCTTGGGCAGACCTTCCGTTTCAGTAGCGGAAAGAAAATGAATTTT…	-
RPL39	S_Bayanus	1.47937	0.0391726	ATTTAATTATGCTATAGCAATAACAGATATAGTAAAACAAGAATTATAGACTACCAATTAAGACTATTCAAGTTGAGATTGACTAGCTGCAAACAAAATATCCAGAGAATATTTCACATTTCCCAGAGAATAACTTACCAGTTGTAAATGCGCGTCGCTCGCTGCCTATTCTCTACGTGTGCGGTGTAAGGAGGTATAAAATATATGTACATAGTTATAAGTGCAGTGTGTGGGTTAACGGGACATATTTAGCTGTTTTTTTTCTTGTTTTTTTTTTAAAACTAGACGTGATGCAGCTCGTTTTTTGCTCCAGCCCGCTTCGAGCAGCGTCGGCCCAGGAAACTTTCTCCAAAGGGAAAACTTAGGCAGAGAATCCCTCTTCCTGTTGGAACCAAGGCA…	-
RPL39	S_Kluyveri	0.789186	0.0184107	TTTGTTGCTTGTGTGTGGTCGTGCAGGTGGCTATTCAAGTTAGCACCACATCGGCCCGCGTCAAGTATCTATAGCTGCTGAAAAAATCGCAGGGCCCCGAGTGTCGAGCCTCGAGCACCGCGCATGCGTGGCACCGGGCGCGAGAATATGGTGTCGTTTGTGTAGTTGGTTCTCTGGTGTGACTGCTGGATGTACGCATGCATGGGGTGTCCGGATTTACGCAGAGTAAAAGCTGCTAATTGTTGTATTATATTAAGTGGTGTCTGGGTCTTGAAGCATTGTTTTCTGCTACTGTCTGTTTTTTTTTTTATCTTTTTTTTTCCGCATCTTCCCAAAGTCTAAAGTGGAGGGCAGAGCATGGTTATTGGACGGTATTGCAGAGGGGAGCAGTAGTGGATT…	-
RPL39	K_Lactis	0.0174232	0.0150877	TTTGGTGCTATACTCTTCTGGGATCGGAAAGGACTTGTAAATCCATTATTAAAATACCGTACATAAAGCATTAATTCACTTTCAGTCATATAATCGCTTAATTCAACTCAAGTTTCAAGCATAATCTGATGGTGAAATTTCATGTTTCAATAGCTTTCCTCACGAACAAAGAACAGCCGATTTGATTTTGATTTTCAGAACGGCATATGTTGGTAGGGACTGTTTGTAATATATGGTGTGTTGGGGTTTTAGTTCAGGGTATACGTGAAATTATTGTGCAGTGTATGGGTGTTTTTCCAATTTCAATTTTTCAAGTACCCTATTAGGAAACAGCTGAATTCAATTCCTTTCGTCTCTAGGAATCCTGTTGCGAAAATTCAATTCGTGAACCCAAATTTC…	-
RPL39	Y_Lipolytica	0.0105198	0.00754387	TTTTGCAGATGGAGTGTAAAAACACTTTGGGGCGATATTTTTGCCAGTGTTGGGAGGTGTGTCGAATAAGGTTAAGGTTGTGCATCGTCGAAAAATCCCAGAGTTTTCACAGTCACGTCACATGACCAAAACTAGGGTTGGCACTCACCAGGACCTCCCAACCGCACACGCAAAAATCCTCAAATCAACCTTGGTTTTTTACAAGATTGACAACGACAAATAACA	-
RPL39	S_Pombe	0.0283326	0.0115364	TTTATTTGAAAAGGGTGATACCCGACAAGAGCCCTTTTTTTGTCTTTCTGATCAGTAAAAGGGTTTCCATTGTTTAGATTAACTCCCTCATATATCGTTAAGTTATTTCCGAATTTCCTTTATTTAGGTCATGTATACTATTATGCGATGAAGCATGACCAATGCTATTAAATTACTTAATATTTCCTTATTTTGAAAATGGATGTTTGTCGTTTGTCTTCTAGATATGTCTTCATCCATAGTCAGGTTTGTGTTTTATTCCAAAAACTTGTCAATTTCAAGGATTGAATAACAAGGTTACTTTTTAGGCATTATGGCCTTACTAGCAATGTAAGGAATTTTAATGTCTGTGCTATTTAATGTTGTTTGGTCAACTGATTAATTTAATTTGCTAACGTG…	-
RPL39_v2ha	D_Hansenii	0.156737	0.00862316	GCGCATCGTTTACTCAATGGGTTCCACCAGTGGGGCTGCACTTGCAACTCGTGTATTATAATGCTACAAAGTGGATTAGTTTAGGGTATTTAGAACCAATTAATACAAAACGCTATATAAAAACAGTGTAGAAATACGGGCCCACGGCTTGTTATGGGATTGGTTTCAACATAGCGGCATGTTGAACTGATTCTGACAAAGTCTACTACTCGATGCTAATGGAATACGAGGCCATCATGGTCTGTATTAGGGCTATTGGCCTAATGATGCCCTTTAATATCGTGAGGACCCGTCAGGTTCAAAATTGAGTCGTCTGTATACCGAAAAGTCGTGAAAAAAAATTCCAAAAAATTGAGACGGATTGTATGCGGATGGTAGATTCTATCGTGAAAAATCCTA…	-
RPL4	S_Kluyveri	2.88212	0.0309928	AGCTATTTTGAAAGACTATAAATAATTTTTTTGAGTAATAACAGTCCCTTATAATCTATAATTTTAATATAACATAATTTGTTTTATACTGACACAATGTATAATGCCCGTAAAAGATTACCTGGCATTTGTTTCTTTTTTTTTTTTTCCCTCTTCATAAAGTCACGACGCAAAAGCGTCGTAAAAAAAAAAATGCATCGCTGAAAAATTTTTCAAGTATATAAAACAGGTGAAAAATTTTTTGTCCTCTGCCCATCTTTTCTTCATTCTATTTCAAAAAAAAACCATCATCACATAAATAGAA	-
RPL4	K_Lactis	1.24214	0.0186794	GATAGCTGCATCCGAGCATATATACACATGAATATAAACGTATATCCACACAATTAATCACGTGACTAGAACCAACCCTCATCCCGTACACAATGACCCATATCGCAAAAGAAAAATTTCTTTCAAAGTGCATCGTGGATGAAATTTTTCAGATATAAAAAAGTGAAAAATTTCGATGCCCACAAGAGAAGAAAACTTTTCAACAATAGTTAATTTGGTATAATTTAGATCTTTTGCATTACAAAGTTTTACTTTCTCCCTCCCCATCATCAAGTCCATTTGATTACCTATCAGTA	-
RPL4A	S_Cerevisiae	2.64242	0.025283	ATAATATTGAATATGCACTTTTACTATATTAATATCACGTCACACGACGCACAGTGAGAAGTGAAAAATTTTTTTTCAATCTGAAAAAAAAAAAAAAAAAAAAAAAAAATTTATATAAACGAATGGTATCTCCATCACATTTCTTTTAGCCTCGCAACTTGTACTTTTCATCACTTTTCTTGTAATTTAGCAATATCCCAAGAACAATCATCGAA	ATAATATTGAATATGCACTTTTACTATATTAATATCACGTCACACGACGCACAGTGAGAAGTGAAAAATTTTTTTTCAATCTGAAAAAAAAAAAAAAAAAAAAAAAATTTATATAAACGAATGGTATCTCCATCACATTTCTTTTAGCCTCGCAACTTGTACTTTTCATCACTTTTCTTGTAATTTAGCAATATCCCAAGAACAATCATCGAA
RPL4A	S_Paradoxus	2.43448	0.0277706	ATAATATTGAATGCGTATATTGATTCTATATTATCACGCCACACGAAACAGAGTGAAGCGAAAAAAATTTTTTCAATCTGAAAGAGAATAAAAAATTTATATAAACGAACGGCATTTCCAAAACATTTCTTTTGGTCTTTGGTCTAGCTACTTATAGTTTCACTATTTTTCTTGTAATTTTCGCAATCTCTCAAGAACAATCATCGAA	-
RPL4A	S_Mikatae	2.43267	0.0243334	ATAGTATTGGATGCATACATAATAGATCTAGTATTCAGTTAATCAATCAAATATTTTATATCACCTTCATAGAATCAAAACTAAAATAGACTATTATTATCACACTACACGAGAACCAGAGTGAAAAAAAAAATGAAAATTTTTTCCTCTTCATCTGAGAAAAAAAATATTTAAACGAATAGTATATCCATCACATTTCTTTTACCTTTTCAAATTCCACGTTATCAACAATATATTTTGAAAAATATTTCAGTCCTACAAGAACAATCATCGAA	-
RPL4A	S_Bayanus	2.89694	0.0680806	ATAGCATTAAGTATTTCATAGCGTATTACTATCACGCCACACGAGAGCAATAGTGAAAAAAAAATGAAAAAAAAATTTTTTTCATCTGAAAAAATATTTAAGCGAAGAGATACTTTCATCTCTTTCTCTTTAGACATTACTACTTACATATTGTTTTTCTTTTTGTAATTGCCCAATCATCCAAGAACAATCATCGAA	-
RPL4B	S_Cerevisiae	0.755118	0.005558	AAGTTTATTTTACCCTTGGGTTTCGACTCAAAATATTGGATTACGATCTAAGCAAGGTGTTGCAAGTACAAGCTAAACGAAAAGAATAAGACAAAAAAACTGAGGCTCCTCAAACTGGTCACCAAAATTGAACTTCAAATTTAGTGTTTCTACATTTTTTCTATTTTGTTTCATTTTTATATCCCTTTCATATGATTAACAAAACTTGGTAAATTATCTGGCCTGTCAACCCTTACCTGTCCTGTCCCTTCTTTAGACAAAAGAAAATAAAAAAATTGGACACAGGAAAACAACAGCCTCCATACCACAGTTTCTGTGTCTTATTCTATTTAGGAAGGTCATTCTATATTACTCAAAGGAAAGACATCCAGTAGAAACAATAGTGTTGCTAAACGGTTA…	AAGTTTATTTTACCCTTGGGTTTCGACTCAAAATATTGGATTACGATCTAAGCAAGGTGTTGCAAGTACAAGCTAAACGAAAAGAATAAGACAAAAAAACTGAGGCTCCTCAAACTGGTCACCAAAATTGAACTTCAAATTTAGTGTTTCTACATTTTTTCTATTTTGTTTCATTTTTATATCCCTTTCATATGATTAACAAAACTTGGTAAATTATCTGGCCTGTCAACCCTTACCTGTCCTGTCCCTTCTTTAGACAAAAGAAAATAAAAAAATTGGACACAGGAAAACAACAGCCTCCATACCACAGTTTCTGTGTCTTATTCTATTTAGGAAGGTCATTCTATATTACTCAAAGGAAAGACATCCAGTAGAAACAATAGTGTTGCTAAACGGTTA…
RPL4B	S_Paradoxus	1.30644	0.013106	AGCTAAACGAAAAGAAGAAGAAAAATACTGACAACCTTCAAACTGATTATTGAAATCAACTTTCGAATTTTAGTTTTTCCACATTGTTTCCACGTTGTTTCGCTTTTGTTATCTCTTCCATATGTTCAACAAAACCAGGTAAATTATCTGGCGTGTCAGCACTTTCTTTTTTTTCTTTGGACAAAAGAAAATAAGAATTCGGACACATGAAAACAACATTGCCGATACGACGGTTTCTGAGTCGTATTCTATTTGAAAAGCCCATTCTTTACTTCTCGAAAGGACAACAACCAGTAGAAAAAAATAGTGTGGCTGAACAGTTCAAAAAGCCCAATAATGTCTGGTTATACTTGCAAATCATTATTGTAGCAGGTCTATCCCCGAAGCGCTGTAATTATA…	-
RPL4B	S_Mikatae	0.367663	0.00442914	CAAGTACTGTATATAATGAGACAACAGAACCAATTTTGTATTGGCGAGAAAATAGTTATTATACACGGTTCAGTCCTAGTTAGAGAAGATTAAGCTAAGCCTATTTGAGGAACAAGAAACAAATCAGCTATCCCAATAGAACCTGAAATTATGAAGTTTTCGTGTTTGTTTCGCGTTTGTTACCTGTTCCATATATCTAACAAAACTAGGTAGATTACCTGGCGTGTCAGCTCCGCTCCCCTTCTTTCTATCTTAGGACAAAAGAAAATAGAGCTCAAAATACAATAAATTGTTTGTTTATACGGCTTTCTCTTAGTGATACTACCTGAAAGTACCGTTCCTTACTTCTCGAAGAGAAAAGATACGACAGATATCCAGTAGAAAAACTACCGTCGCTAA…	-
RPL4B	S_Bayanus	1.06791	0.0108937	CATATTTTGTTTCACTTCTTTCACTTCTTGTTTTGCTGTAACTGTGTTTATTATAAAAGCCAATTTCTTGAAACGATTGGAAAGCTCAAGTTGCTAGAGGGAACGGAAGTTCAAGCTATTATAGTCCGGTATCTATACGATGCTTTTTAGTATGACTTTCGAGAATTTGTAGTACATATTTATAGTTTCCCCTTTGTTTCGCATATGTTACCTGTTCCATATGCTTAGCAAAACGGAGTAAATTATCTGGCGTGTCAGTCGTTTTGGCCAAAAACTAAAACTTGGTTGGACACACTTGGGCCTACGGCGATTTCTAAGTAGACGGGGAGGCGGTTGTGCATAAATCGAGGGTTACCCTACCCTTTTTGCGTTGCCCAAAAAGAAGACACCCAGTGAAAA…	-
RPL40	S_Kluyveri	1.31405	0.0210798	GTTGTGGGAAAAATAGAGTAACCAAAAGTTTATTTTGTGATATACGGTATACTGTGTCCCTTGTTCGAGCCGATTGACCACTTATTTGTAGGAATTTATAAGTAGAATTAGTTTTTTCTTAACCTTTACTCTTTCTACTTAGTTTTTCCTGCTACTCACACCCCTCTATGGTATCTTAGTTTCGACAACCCTTCGCTAGTAGGTTGTTTGTCTTTCGCCACCAATAAACAAAAATATATATGTATATATCCGGGTAATTATATAGGGCTTTTTCAGTTTTTTGAGGGCTCTAGGATGTGACTTTTACATCCGTACATTATTGTATTTTGGAATTTGTTTAGGTGTAGTGATGTTATTTTTCCGAAAAAATTTTTTGGTTTGGATTCTATACTGCATCGC…	-
RPL40	K_Lactis	1.54836	0.0273115	TCTCAACTCCACAACACAACAATGGAATAGCAATCTATAAGACGCTACTTTTACCTAGTGTTCAAGCTAATCGCTATGATATTCAATTAGAAGTATACTAAAAATTTCTGCAGGTATACATGAGCATATACAATGCACATAGGCTTTGTTCTTGACAGGTAATTTTTGTTCAATTTCAATATTAGGTCCAATTCGGTGAAATTCAAAATAACGACCAGATACCACGAACTGACTGCAGAACGAAATACAGAAGTCGTATCTAAACTAACAATCAGGGTAACCGGTACCAGTAAAATTCTACGTTCCAAGTTGGGACGGTTTGCAACAACATCCGTGCACTATTCAACAGTGTGTCTGGGTGTATAAATTTCGGGGCTTGACAATTAAAAATGCATATAT…	-
RPL40A	S_Cerevisiae	1.20331	0.030619	CGGTTTGCTTCCGCCCAGTGTTCTTTCGCCTTAAATTTCTTTTGGTAAACTTCCACTAGAAAAAGAAAAGCCACCAGAGAAATAAGCGCTTGCAATTTAACGCCGATATTGTTTTCTTCTTCTATTATCTTCAATTATCGATCAACTCTATCCAACAATTCTATAATATCCACTGTTCATTAACGAATATTGGTCTTTTTCCCTTATGGTGAAGTAAATTTTCCATGCAATATCCGGGTAAGCTATCGACAAGTTTATTGACTGCAATTTGAGTTTATTACATCCGTACATTACTAAGATGTATGGTTTTTCTATTTTTGTGCTCCGTGTCGATATTTCGTGGAGCAAACCAGAAAAGATGCGGAACCTCTTAGCACTCCGCCTGGACATAGGCGGAGC…	CGGTTTGCTTCCGCCCAGTGTTCTTTCGCCTTAAATTTCTTTTGGTAAACTTCCACTAGAAAAAGAAAAGCCACCAGAGAAATAAGCGCTTGCAATTTAACGCCGATATTGTTTTCTTCTTCTATTATCTTCAATTATCGATCAACTCTATCCAACAATTCTATAATATCCACTGTTCATTAACGAATATTGGTCTTTTTCCCTTATGGTGAAGTAAATTTTCCATGCAATATCCGGGTAAGCTATCGACAAGTTTATTGACTGCAATTTGAGTTTATTACATCCGTACATTACTAAGATGTATGGTTTTTCTATTTTTGTGCTCCGTGTCGATATTTCGTGGAGCAAACCAGAAAAGATGCGGAACCTCTTAGCACTCCGCCTGGACATAGGCGGAGC…
RPL40A	S_Paradoxus	1.09768	0.00850672	CTGTTTGCTTCCGCCCAGTGTACTTTCGCCTTAAACTTCTTTCTGTAAAACTCTCCACTAAAAAAAGACAAGCCACAAGAGAAATAAGCGCTTGCTATTGGACACTGGTATTGTTTTTCTTCTTTTACTGTCTTCAATTGTTGATCGACTCCATCCAACGATTTCATAATAGCAATAATTCGTTACGAATAATAGTGTTTTTTCCCTTATAGTGGAGTAAATTTTCCATCCTATATCCGGGTGAGAAATTGATGAATTTGTTGACGGCAATCAAAGTTTTGCATCCGTACCTCATTATAAATGTATGAGTTTTTTTTTTTTTTCTTTTGTGTGCTTGCAACAGAAATTTCATGGGAACATCAGAAAAGGCGCAAAGTTTCCTGGTACCTCCGCCTGGAC…	-
RPL40A	S_Mikatae	1.19898	0.0294701	TATTACGTCTTTGAAGGAGCAATTGCTTCTACCTGGTGTATTGTCGTCTTGAAATTTTATATATTAAACTCCTTCTTTGAAAAGGCAAGACACGGCAAAATTAGTGATTGTTATTTAATACTGGTATTCCTCTTCCTCCACAGTCTTCAATTATTGATTAGCTCTGTCCATCAATTTTGTAATAGTAAGTATTTCATCAACAGTTAATTGTCTTTTTCCCTTACAATAGCGTGAATTTTCCATCATGTATCCGGGTAAACTAGTTGCAAATTTAAAGACAGCTTACCTCCATACATTATTTGAATGTACGGATTTTAAGATTATTTTTTTTACCCTTGCTTTTTCTGTTTTATTTGCTGCCAAAACTTCGTGGGGCGAACCAAAAGGTGCAGCATGTCC…	-
RPL40A	S_Bayanus	1.46428	0.00943599	TATTTTTAAGAATAGTCGATTTTGCTCAGTATATTCTCGCCTTTAACGACCGTCTCCTAGAAAAAAGCAAGCCCCAATAATAAGTGTCTGTCACTAGGTATCACCTTTCTGTTGTTTTCAATTCTCAATCGGCGTTTTCCAATGATTTCCAAATACTGAATACTGAATACACTACTAATAGTGCCTTTTCCCTTATATGGCGTAAATTTTTCAAGAAACAAAGACTCCGTCCGGGTTATATATTTTTTTAAAATCCAAAAGTTGAAGTTTTTGAATCCGTACATTAACTGGTGTATGGGTGCTTTTATTTTTTTTATCATCTTCTTCATTCGCCTGTTTTGAAGTTTCGTTGCCCATGCCTGTAAGGACGCACAGTCTTGGTGCGCTTCTGCCTAGAGG…	-
RPL40B	S_Cerevisiae	1.51308	0.015182	TCCTAAAACGTGGCGTTACTGACTATTTGTGTAGCTTCGGCGAGTATCAGTTAAGTCCTAGTCAGCACAAGAGATGGAAAAATAGACAGGCAGCAATATATCTATCAGTAAATATTGTAAATGGAGCGTATCTCTCCGGCGCCGTAAGACTCAATGGACCACTTTTATTGATATCTCTGTCTGTATTCAATTTGCCTTCCAGTTTTCTTTTCCCATATACTCTTGTTGTCATGTCAAGAGGAATGAAAGGAAACAAAGATGGGAAGAGCGCGTTACCCCGCGCGTCGATCATCATATTATAAAGAAGACTTAAGTTATTATTTTTGTCAGTAATATTCACCCTGATATAATGTTAGTAAGAAGTAAATTTTATTATTCCATATAGAATCTATGGAAGGT…	TCCTAAAACGTGGCGTTACTGACTATTTGTGTAGCTTCGGCGAGTATCAGTTAAGTCCTAGTCAGCACAAGAGATGGAAAAATAGACAGGCAGCAATATATCTATCAGTAAATATTGTAAATGGAGCGTATCTCTCCGGCGCCGTAAGACTCAATGGACCACTTTTATTGATATCTCTGTCTGTATTCAATTTGCCTTCCAGTTTTCTTTTCCCATATACTCTTGTTGTCATGTCAAGAGGAATGAAAGGAAACAAAGATGGGAAGAGCGCGTTACCCCGCGCGTCGATCATCATATTATAAAGAAGACTTAAGTTATTATTTTTGTCAGTAATATTCACCCTGATATAATGTTAGTAAGAAGTAAATTTTATTATTCCATATAGAATCTATGGAAGGT…
RPL40B	S_Paradoxus	1.28919	0.0107683	TGCTAAAAAGTGGCGTTACTGATTATTTGTGTAGCTGCGTCGAGTATTAGTAAGTCCCGGTCAGCACAAGAGATATAAAAATAGACAGGCGGCAGTATATCTATCAGTAACTGTTGTAAGTGGATGGTGTCTGTCCAGAGCCGTAGGACTCAATGGTTTAGTTTGATCTGTTTTCTGTTTGTATTCAATTTGCCGTTTAGTTTTCTTGTTGCACATACTCTTGTTCTCTTGTCAAAAAGGAATGAAAGGAAACAAAAAAGGAAGAGCGCGTTACCCTGCGCGTCGATCATTAAATCATAATTAAGACTTATGTTATTATTTGTCCGTAATATTCATCCTGGCATCATGTTATTGGGGAGTAACATTTGGTGGCCCACCTAGGGTCTCTGAACGATTGAG…	-
RPL40B	S_Mikatae	1.25565	0.0220046	TGCTAGAATTTAGCGTTACTGATTATTGTGTAGCTGCGGCAAAAACTAATTAAGCTCTGGTCAGCAAAAAAGATATAAAAATAGACAGGCAACAATTTATTTATCAGTAACTATTTTAAGTGGGTGTGTCTGTCGAGCGCCGTAAGACTCAATGGTTTCGTTTAGTGTATTCTTCTGTTTGTATTCAATTTGCCATCCATTTTTGTTGTTCACATACTCTAGTTCTCATGTCAAAAAAGCAATGATAGGAAACAAAAATAGTAATAGTGCGTTACCCCGCGCAGTGACTATATAAAGACGTAACAAGCATCTGTGTTAAGACGACGATGAAATATTATATTCGAAGTATTAATTCAGACGTCACAATATTGGGAACTAGTTTCTAGTGTCGCAGCTAAT…	-
RPL40B	S_Bayanus	1.30958	0.0219262	GTCGAAAACTGTTGGTACTGATTATTTGTGTAGCTGTGCTAAATATTAGTTACACCTGATCAGCGCAGGGAATAAAATTTGACGAGGGGAGAAATATAGATCAGTCAGTTTTCTATTCTCGTTCGTCTGACAAACCCTGGTACAAAACTCAATGGTTCTGTTTCACTTGTTACTATGTTTATTTGCAAAATGCAATTCACACTTGTTGTACACATACTCTAGTTTTCATTAAAAAAAGGAAACGACAAGGAAACAAAAAAACCAAAGCCCGTTACCCCGCGCATGGATCATTAGGCCATAAGAAGAGCCATAATATAGGAAAAAATGCACCGGAGGTTTCTGGTAATGGGGGCACTCTGTACTCTTAATAGAGTGGAAAAACACCTGCGATTCCTTTAT…	-
RPL41	S_Kluyveri	0.769777	0.0192885	CGTGCGCTTTAACAAAAAAAAATGCTTTTATGAAGCTTATGTTTAACTTTGTACTCAAGAGAATATTCCGTTCGTATTCACCAAACCTACTCGAATAACCTTCAGTCCAAACACGTCTTCGTTACTGATGATTGTACTGGTGCTGGTGGGATGAGCTTCCGCCCGGCAATACCGTTTAAAAATACGTAGATTCTGATTCTGTAACTTGACTGTCATACAGCTCACACACCCGTACATATTATAGCCGTTATGATAATACTGCTTGTTGACCCACACACCACGTTCATGTTGGACAGAGCATCTAATATATTTAAATACATATACACACTAATGTAATAAGAGTAATAAGAGATGAATAGACACGGTAATTGTAGTATGACAAGGTGGTATTAACGCTGC…	-
RPL41	K_Lactis	0.996289	0.0800581	AACTAGTGATGCGTCATATATGATTATATGATGATATATTTATATATATTTATAGTGCATTCACATAGGAAATAAATAACCGAAGTGACAAAGGGACATGACCGAATAATATGCCAAACATGCTAGACATCCGAAGAACTTAGGACTGCTTACACCCATACACCAGTTAAACACCCTTACACCCAAATTTGGTCAATCGGACAATCAAAGAGTTTATTATAATACCGAAATAGGAAATCGAATACCCAACCCAAAGCTTCAAGATATAAGGGTTGGCCCTGATAAATCACTTACATACCAAAAGAGGCACCAATAACAAGCCAATAAGATCCAAAGATCACCACCACTGACTGCAGATTGACCGTTTTGACTATAAGGTTTTTTTACGGCTTCGAAATG…	-
RPL41A	S_Cerevisiae	1.04495	0.026472	TGTAGATTGTCCACTATCTCATGTAAATATACATAACAGGTATTCCTGAGCGTTCGAAAATTAGACTGTACTTTTCTGATGCGCTCCCGTACACCTTTGACATATACAAACATCCGCACATTTTATAGCTTTCTTTCTAGAATTTTTTCCACGCGCTCTCGATCAATGAACTCTTAAAAGTAACTGACCCCTAACTTTTTCCCAGGCAAGGCTGGCCTCATTACCCTACCCGAAAGTTTCACTTTACCCCATGGCAGATGGACGATATTTTAACAAGACGAAACTGACCTCGTCTTCTATAAAACTGGACTTCTAAGCAACTCTCATTTATCTTATATCCGTTCCATTTTGTACTAAAAGAACCAGACCACATCGATTCAATCGAA	TGTAGATTGTCCACTATCTCATGTAAATATACATAACAGGTATTCCTGAGCGTTCGAAAATTAGACTGTACTTTTCTGATGCGCTCCCGTACACCTTTGACATATACAAACATCCGCACATTTTATAGCTTTCTTTCTAGAATTTTTTCCACGCGCTCTCGATCAATGAACTCTTAAAAGTAACTGACCCCTAACTTTTTCCCAGGCAAGGCTGGCCTCATTACCCTACCCGAAAGTTTCACTTTTCCCCATGGCAGATGGACGATATTTTAACAAGACGAAACTGACCTCGTCTTCTATAAAACTGGACTTCTAAGCAACTCTCATTTATCTTATATCCGTTCCATTTTGTACTAAAAGAACCAGACCACATCGATTCAATCGAA
RPL41A	S_Paradoxus	1.27052	0.048407	TTCAAAATGTTCGTTATCTCATGTAAATATATACATATTAGGTATGCCAGGGCGTTCGAAAGCTAGACTGTGCTTTTCGGATGTGCTTCCGTACACCATGTAAGATGTCAGTACATCCGCACATTGTTTTTTAGATCCATGGCACGCGCTTTAAATTAATAGACTCTCTACTACAACTGACCCCTAACTTTTTCCAAGGCAAGGCTGGATGCATTACCCTACCGAAAAGTTTCACTTTTCCGCGTGGCAGCTGGACGATATTTGAACGAGACGAAACTGACCTTGTCTTCTATAAAACTCGACTTCAAAGCAACTCTTATTTTATCTTAAATCCGTTTCTACTCTAGAATAAAAAACCAGACCACATCGATTCAATCGAA	-
RPL41A	S_Mikatae	1.25803	0.0419805	TTGAATTGGTCCCATAATTTCATGTAAGTACATAATATCAAGTATGGCTGAAAGCTTCAATGCTAGACTGCACATTTCTCGGTGCGCTTCCGGACACCATACAACATACAAACATCCATACATTTACTTTTTTCTTTCAGTTTCTATTGCCCATCGCCCTGAATTAATAGGCCTTTCACCGTGTCTAAACCCCTAACTTTTTTTTAAACAAGGTTGGATTCATTACCCTGCTTTGTTTTGGCCATCAGTTTCTGTTTTCCCATGGTAGCTCGATGATATTTTAACTGGATGAAACTCATCTTCTATAAAAATTGACATCTAAACTGATTATATCTGATCTTATGTCCGTTTCTTTTTTGAAGTAAAAAGGAAACCACATCGATTCAATCGAA	-
RPL41A	S_Bayanus	1.1747	0.0440854	TTGAAATTCGTTTCTCTTCTCATGTAGATATATAGTATGGTTAATTGATTGATCGTTCGAAAGTACCACTTTCTTTCTTTCCAAAAATGCATCCGTACATCAGATGCTTTACAACATCCACACATTTAACTTCATGATTTTTCTTTTCATTTTTATGAAAGCCGCAGTTTTTAGCAGGCTCGAGATTTATCTGACCCCTAACTTTTTCCAGATCAAGATCGGCAGCGTTACCCAGCCGATATTCGCCAAAAAATTTCAGCATCCTCACGGTAGTTGGACAATATTTTAACAGAACGAAATCGATCTCATCTTCTATAAAACTTGACATCCTATTAGTTTCTATTCAACTTAATTCCATTTCCAGTCTGGTTTAGAGGGGCAGACCACATCGATTCAATC…	-
RPL41B	S_Cerevisiae	2.19113	0.031091	TGTCAGTGTAAAAAAAAAGAACGCCTCAAAAAATGCAAAAAAATATCATTCACTTTCCCTTCTCAGCAATCTCACGGTTTCGAAATAGCAATCAAAGTATTTTTATAATTGACTAAACAAAAGGTGGTTGGAGACTTTGTGTTGTAGCTTAGAATTTCTTCCACTATATGAAAGCCAAGACCTCTTCTCCTCTTTCGACACTTCGTTTATTTCCACTTTCCCTTATTTAGTATTCATCGTTCAGAATGCTTTCTTTATTTCACGACGGTTACCACACCCGTACACCCTTATCTCATTTCACCAGTACCTTTCCTTATTAGATTCATCTTATTTTATTTTAGGATTTTTAGGTCATTGTACGACGCGTGTCGCACCATGGAAAAGGTGTCGCAGCTGCGA…	TGTCAGTGTAAAAAAAAAGAACGCCTCAAAAAATGCAAAAAAATATCATTCACTTTCCCTTCTCAGCAATCTCACGGTTTCGAAATAGCAATCAAAGTATTTTTATAATTGACTAAACAAAAGGTGGTTGGAGACTTTGTGTTGTAGCTTAGAATTTCTTCCACTATATGAAAGCCAAGACCTCTTCTCCTCTTTCGACACTTCGTTTATTTCCACTTTCCCTTATTTAGTATTCATCGTTCAGAATGCTTTCTTTATTTCACGACGGTTACCACACCCGTACACCCTTATCTCATTTCACCAGTACCTTTCCTTATTAGATTCATCTTATTTTATTTTAGGATTTTTAGGTCATTGTACGACGCGTGTCGCACCATGGAAAAGGTGTCGCAGCTGCGA…
RPL41B	S_Paradoxus	1.85369	0.0340202	TGTTAGTGTAAAGAAAGAAAGAACGCTTCAAAAAATGCAAAGAAATATCATTCACTTTCTCCCCTCAGCAATATCACCGTCTTACAGTAGCAACCGAAGCACTTTATAATGAAAAAGTTACAGACTTTCTGTTGTAGCTCGGAAAATTGTTACGTTAGATGAAGGACAAATACCTCTTCTCCTCTTTCGACACTTCGTTTATTTTCCACTTTTCCCTTATTTAGCATTCATCGTTCAGAATGCTTTCTCCGGTCAACGGCCGATTTCTCCACCCGTTCATCTGTATACAAATTCAATCCGTACATTTTATATTTCAACAACCAAGTCTTGTTTTTCAATCTTCAGGTGATATCCGATCGCATGTCGCACAGCACAAAAAGTGCGCCATTGCGATGTTGT…	-
RPL41B	S_Mikatae	2.28936	0.070743	CGTTAATGAAAAAAAATAAAGAATGCCTTAAAATATGCAAAAATAAAATACATTCACTTCCTTCGACAAGTATTTTCGCCGTCTTACTTCAGCAACCCAATTTTTTTTTTTTGTGTAGGTAAGTAAGGAAAATTTGTAGAATTCCAGTTACTACCCATAAATCTGATATATTAAATGAAGGATATACATCTCTTCTCCTCTTTCGACACTTCGTTTATTTTCCACTTTTCCCTTATTTGCACTCATCGTTCAGAATGCTTTGTTCTACTAATCGACCGTCATTACACCCGTACATCTTCAAGAAAGTTACACCCGTACCATTTCGTTATGTTCACACTTCTACATTTAGGGTTGGTCGGGTGAATACCGTTGCATTTAACGCACAGTAAAAAGGTATTG…	-
RPL41B	S_Bayanus	2.22624	0.0500416	TGTCTAGGCTTGAAAAATGAGAAACAAATATTCAAAAAAAAAGTATCATTCACTTCCTGTTCAGCAATTTCGCACTTTAACTTTCGAAGCCAATATATTGTACACGTATGCAAAACAATGTTATAAACAGATCCTTGCTTTCTAGCAGACTCTTACTATGCTCAAAATGTAAACACCTCCTCTTCTCTCTCCGAAATTTCGTTTACCTTCCACTTTTCCCTTATTTGGTCATAGTTCGTTCACGGTGATGCTAGAATGAACTGATTTCAACGACTGCCTGTCGCCCGTACATTTATTCCGTTCTCACACCTGTACATTCTTGACCCGCAATGTATTTGTCTTTTAAGAATCCGCCCGAGACACTCCCCTTCCCCCCCCCTAACGCAAACTATAGAAAGA…	-
RPL42	S_Kluyveri	1.24955	0.0479637	GGCTTCTCTCTTACTGTGGTTATTCTTGTTGCTGGCAAGTTTGACAAGGTCTCATCGGTCCTAGTGTTTCAAATATAGAAAATTCTTTTTCAGCATTTGTGTACAGTAATATTGGGTTTCCCAATGAGGCAATGTCATATAAAACGGTTACCGACCCAAAGCATGTATGTAAGGAAAGGCGCTGACATATTCCAAGTACCAAAAATGAATACGAAGGTCTACATCTTCAAGGAAACAAGGACTTAGCTCTTTGCGGCTGTCTTTCTGGCACTCAATTATGGTTAGCCCTCCATCTGTGGTGATGCATTCATTTTCGAATTGACGCGTGTCTAAATATATATATGTTTTTATGACTGCTTTTATCAGTTGTACACCCGTGCATATTAATAAATGTCACAC…	-
RPL42	K_Lactis	1.50308	0.0698295	CTTGAATTTTGTGCTTCAAGCATTGTGAAACCTCTCTTATTTACTCTTTTTATTCTTCTTCTTGTTCAATGTTTCGCATTCTTGTATTATAGGCAATTGGTTTTTCAGTAGGTTTCCCGATTTGGAATAATTGAATCTTTGTGCTCTGACGTGACGGATGGCCGAGGCACATCAGGATGGCTACCAAAGTCAATCTACATGCACCGAAAACATGCTTGCCGAAGCAAAGTTTACTTGAGCATCCTTGAGAAGGGACCGGCAAGAAAACCGGACCCTTGGTGGCAGCGTCCTTCTAAGGTACGTTCTCTTGTGTTAACGCTGTCCGGTATATTGAACCAATTAAAGAGGAAAAAAAGAAATTGATGCGCGTCAGTCTAAGCTGTCGACATTCAAGGGTTT…	-
RPL42	D_Hansenii	0.0779869	0.0107482	GCCAGTCGCAAGCTGAACCAGTCTGGCGGTTTCTCGTCGTGTACATTAGTCTGCAAGACGGTGTTGGTATAGACTCTGGGCTAACATTCGTTTTTTTAATTCTTCTTTTTTCCACCAGGGTACAGTCACTAGACTCTTGATCTTTAAATTCTTTCGACCTCTATTTATTTCGGTTAATATATTATTATGTGTTTATTCAACCTGTAACATCATTTCTAGCGCGGGGAATTATCTTCAAATTATCCAGGCCTTATTCATGGTTTGTGTCTACCAACTAGTATGTGCTTTTTTTGTACCTAGCAGCAGGTACTCCTGGCACATCTTATTCTACTGCTTGCGAAATACTCTACAATTGCATCATATACCGAAAGACTCCGTTTCTCCTAGTTACACCTAAGC…	-
RPL42	Y_Lipolytica	-0.00542558	0.0104056	CTACAGTTTCTAACAGAGGAGCACTCCGGCTGGGGAGTGCAGTATGTGCCCCAGAGGCCAATACTGGACAATCAAAAACATCCTATCATCAAATACAGAGGGAATAATTGATATCATCAGAATCAGCAGAAAATTCTGAATCCATTGGTCGAGCACCAAGGAGACCAGTGCTTATTGAAGATGGTGACAGACTCGTTTGCTGAGAAGTGCTACTGCAATCTTCTGTACATACTCTATAAATCGGATATGGAGAGGAGCTGGATACTCGAGCTGAAGACTGGAGCAGGATAAAGACAGCCGATATACTCTTTGATTAGTTCAACAATAACAACAACAACTTTTACTGTGATACTTGTCTTCTCCCGTCTGTAAACATGTCTTCTGGTACCAATGACAAGC…	-
RPL42	S_Pombe	0.0295507	0.00235116	TTCTTGTATTAATATTTAGTTTGAGTTAGAACAAGATTAATATGAATGTGAATATTTTGTAAAATAAATGTTTTGTAATTAAAGGATTTAAGGGCGCTACCACTAAATATATAGTATACTCAAGGTCCAATTATGGATTTAGGTACAGATTAATTTGGGGCGTCACTTTGACGTGTCGATGAAGTATGATAATTGGGAAATACTGCTTAGCCTGACTTGACTTGTTTTAAGTCGCTATTTCGCTATTTACATAGTGATATCTACATCATTTTCCTAAACTTTTGGTGGAGCAATATCTCATACTGTTCGGATGCTGTGCCAAGTCTTGCATAAAGAAATCAGTGAAGTCGATAAATATAAGATTTGGAGTGCAGCGATGGTAACAACTAGTGATTAAAA…	-
RPL42A	S_Cerevisiae	1.37475	0.011397	GTTGCACTATTGCTGTTCATTATCTTTCATTATCCCTAGTAACGCCATTGCAGAGTCAAATATGAGCGATAACAATATAAAGAGCAATAACATGATAGTTGAAATTAACATAAAAGAAGCGACATAATTAAAGGTCTCAAAGAGTGAAGATCAAGTATCCGGTTTTTACGAATAATCTACTTTCTATGTGAAACCCAAAAAAGTTCGTACAAGGAAAACTAAAAAGTGTGTAATAACTTGTCTAGCTTTGGCATTAAAACTTGTCAATTATTCATCACCAATATAGACTAATGCGTTTTGGAACGCCAAACCGCAGTGACAAATAGCAAATATGTAGCTGTCATATCGGCATATAATAACAGTTTTCTACCAAATGCTGTCCTACATTCAGAGATCTTA…	GTTGCACTATTGCTGTTCATTATCTTTCATTATCCCTAGTAACGCCATTGCAGAGTCAAATATGAGCGATAACAATATAAAGAGCAATAACATGATAGTTGAAATTAACATAAAAGAAGCGACATAATTAAAGGTCTCAAAGAGTGAAGATCAAGTATCCGGTTTTTACGAATAATCTACTTTCTATGTGAAACCCAAAAAAGTTCGTACAAGGAAAACTAAAAAGTGTGTAATAACTTGTCTAGCTTTGGCATTAAAACTTGTCAATTATTCATCACCAATATAGACTAATGCGTTTTGGAACGCCAAACCGCAGTGACAAATAGCAAATATGTAGCTGTCATATCGGCATATAATAACAGTTTTCTACCAAATGCTGTCCTACATTCAGAGATCTTA…
RPL42A	S_Paradoxus	1.46738	0.0728389	GATGCACTGATGCAGTTCATTATCCGACCATCCAACAGCCTCTAATAACGCCATAGCAATGCCAAATATGAGCTATAACAATATAGAGAACAATATACGAGATAGTAGAAGTAAAGTAAAAAGACACCATACCATTAAAAGTTTCAAAGAGTACATATTGAATATCTAGTTCCCACGAATCATCTACTTCTTAAATGGTAGGACATAAAACAGTGCATACAAGGAGTACTAAAATTAAGTAATAATTCATCTTAGTCTAGCTTTGTGAATAAACGTTGAAACTTGCTATTTATTCATCACCAATATATACTAATGTATTTTGCAAACGCAAAAACAGTAATGTCAAATAGTAATTGTGTAGCAGACGTATCGGGATTCATAACAATTTTCTATGGAATG…	-
RPL42A	S_Mikatae	1.46613	0.0540744	AGCATTTACACTTGATTATCCCCCATCCAACGACCCCAAAAATAACTTCATAGCAGCTCCAAACACGGTATATGACAGTATAGAGACCAAGATACCAGACAGTAGAATTAAAAAAAACGACTCAGTACTATTAAATGTTTTAAAGAAGAGAAATTGAAACGCAGTTTCAATTAAACATTCACTTTTTAAACAAGGAAAACTCCTTCACCCGATGAGGAGTTAAAGCCAGCACATTCACCTAAACCAAACTTTGTGAATAGGTACCAAGACTTGATAATTTATTTATTCATCACTAATATATATCGACGAGTTTTAGAGCGCAAACAATAATGACAATTAGCAATTATGAAGCAACGTCGTATCGGCCGGCCATTCACTACAATTTTCTATCAAATCCTG…	-
RPL42A	S_Bayanus	1.61809	0.016017	GTTATGTTGGAGCCTTTCATTATTCATCTCCCGACAAATGGTAGAATACCAAAAGAAACACCATTATGTAAAGCTGAAACAACTTAAAGAGCTAAATACGAGACAGTAGAGGGAAGGAAGCGGCAAAATACTGTCAAACGGCGATCATTTTTTCGTTACAACAGAAAGTACATTTTTCGAATGGAGAGACGCTCTGCAACAAGAAGGGTGGTTGTGTTACCAAAACAAACTATTACTGCCCCTAATTTAACCTCGTAAATATATATTCAGATTTTGCATACATTTACCCTTTCCAATTTATACCGACATGTTCTGAAACATGAGCAAATCATGTCATTTGACATCTTTATAATTGTCGTATCAGCCATTCATTGTACTTTTTTCATACTATCCCGTCCT…	-
RPL42B	S_Cerevisiae	1.64195	0.0420007	ACCACAATTTTTGATAATAGTTTTGATGAAATAAACTTTCCACGTGGAGACAGCTTTGAAAAAACAGTTCAAAGTATGCCAGTGTAGCTTTGACTTTTTTTAATCTTTTTAGTTAAGTTATGCAATATGCTATTTTTATACCAAAATGGATCCTTTTTGATTTCGTGTCTTGTGAAACTTTTTCAATATTTAACCGTTTTAAGAAAGCGAAGCGGGCAACACCAGAAGAATGTCAATAACTTACTGTAACAACATAAAACATGGCATTTTAAATAGTACTGCCAAAATTTAATGCAATGGCAATTAGTTGGCTATGTTGCTACATATTATTTTCCATAGCATTCTCTGTCACAAACTTCAAAATAAAAGACAGTGACATCCGAACATCCGATACACCCA…	ACCACAATTTTTGATAATAGTTTTGATGAAATAAACTTTCCACGTGGAGACAGCTTTGAAAAAACAGTTCAAAGTATGCCAGTGTAGCTTTGACTTTTTTTAATCTTTTTAGTTAAGTTATGCAATATGCTATTTTTATACCAAAATGGATCCTTTTTGATTTCGTGTCTTGTGAAACTTTTTCAATATTTAACCGTTTTAAGAAAGCGAAGCGGGCAACACCAGAAGAATGTCAATAACTTACTGTAACAACATAAAACATGGCATTTTAAATAGTACTGCCAAAATTTAATGCAATGGCAATTAGTTGGCTATGTTGCTACATATTATTTTCCATAGCATTCTCTGTCACAAACTTCAAAATAAAAGACAGTGACATCCGAACATCCGATACACCCA…
RPL42B	S_Paradoxus	1.59728	0.0261583	ACCACAATTTTTGATGGTAGTTCTGTTGTAATAAACTTTTCAAATGAAGGTAACTTTGAAAACAATCTAAAGTATTCCAGTGGAGCTTTGGCTTTCTCTTAACCTTCTTCGAGTTAACTTATGCAATATGCTATTTTTATACCAAAATGGATCCTTTTTGATTTCGTGTCTTGTGAAACTTTTTCAATATTTAACCGTTTTAAGAAAGCGAAGCGGGCAACACTAGAAGAATGTCAATAAATTATTGTAACAACATAAAACATGGCACTGTAAACGATATACCAAACTTTAAAGCAATGATGAAGAGTTGGTTATGTAGCTTCATATATTTGATATCTGTAGTTTTCTCAGTCTCAAATTTAACAATAAAAGACGGTTACATCCGAACATCTTTAACCA…	ACCACAATTTTTGATGGTAGTTCTGTTGTAATAAACTTTTCAAATGAAGGTAACTTTGAAAACAATCTAAAGTATTCCAGTGGAGCTTTGGCTTTCTCTTAACCTTCTTCGAGTTAACTTATGCAATATGCTATTTTTATACCAAAATGGATCCTTTTTGATTTCGTGTCTTGTGAAACTTTTTCAATATTTAACCGTTTTAAGAAAGCGAAGCGGGCAACACTAGAAGAATGTCAATAAATTATTGTAACAACATAAAACATGGCACTGTAAACGATATACCAAACTTTAAAGCAATGATGAAGAGTTGGTTATGTAGCTTCATATATTTGATATCTGTAGTTTTCTCAGTCTCAAATTTAACAATAAAAGACGGTTACATCCGAACATCTTTAACCA…
RPL42B	S_Mikatae	1.57381	0.00704452	ATCACAATTATTGGTGGAAATTCTATAGGAATAAACTTTTGAAGTCAAATTAATTGGGAGAACAGTTCTATTTTCTCGGTATCACCCTCGCTTTTCCTAAATTTCTCTCTATCAACCTATGCATATATTCTATTTTTATATTAAGAATGGATTCTTTGGATTTCGTGTCTTGTGAAACTTTTCTCAATATTATACCGTTTTGAGAAAACAAAGCGGGCAACGTTAAAAGAATGTAAATAAACTGATGTAATAACGTAAAAAAATTGACACTGTAAATAATATTAATAAACTTCAAACTAATTGCACAGAATTGCTTACGTATCATCATATATTACTATATGACATTCCATAAAACACAAAATTAATATAGAGTGACTTTAACATCCGGACATCTTTATA…	ATCACAATTATTGGTGGAAATTCTATAGGAATAAACTTTTGAAGTCAAATTAATTGGGAGAACAGTTCTATTTTCTCGGTATCACCCTCGCTTTTCCTAAATTTCTCTCTATCAACCTATGCATATATTCTATTTTTATATTAAGAATGGATTCTTTGGATTTCGTGTCTTGTGAAACTTTTCTCAATATTATACCGTTTTGAGAAAACAAAGCGGGCAACGTTAAAAGAATGTAAATAAACTGATGTAATAACGTAAAAAAATTGACACTGTAAATAATATTAATAAACTTCAAACTAATTGCACAGAATTGCTTACGTATCATCATATATTACTATATGACATTCCATAAAACACAAAATTAATATAGAGTGACTTTAACATCCGGACATCTTTATA…
RPL42B	S_Bayanus	1.59782	0.0697466	TCTTCTTTTTGATAGAAATTATTTAGCAATATACTTCCCAAGCCAGGTCCACTTAACAAAATTGCTCTTGATCTCCAGGTGCAGCCTCCTCGGTTATTCGTTATGCTTTTTTAAATCAGCCAAATGTTGTATGCTATTTTTATACTAAAAATGGATTGATCGTTTTGATTTCGTGTCTTGTGAAACTTTTTCAATATTTAACCGTTTTAGGAAAGCGGAGCGGGCAACACTGCAAGAATGTATATAAACTATTTGTGACAATAAAAAACATAACATTCTCAATGCTTTTAGTATACCATAACATAATAGTAAGGTATCAGCCCTTCTTGAGAACGCTATAAAATCAATCAGTATGCTAAAAATTATATATTGGAAATTTCAGAAATAGGACTGTTTTAA…	TCTTCTTTTTGATAGAAATTATTTAGCAATATACTTCCCAAGCCAGGTCCACTTAACAAAATTGCTCTTGATCTCCAGGTGCAGCCTCCTCGGTTATTCGTTATGCTTTTTTAAATCAGCCAAATGTTGTATGCTATTTTTATACTAAAAATGGATTGATCGTTTTGATTTCGTGTCTTGTGAAACTTTTTCAATATTTAACCGTTTTAGGAAAGCGGAGCGGGCAACACTGCAAGAATGTATATAAACTATTTGTGACAATAAAAAACATAACATTCTCAATGCTTTTAGTATACCATAACATAATAGTAAGGTATCAGCCCTTCTTGAGAACGCTATAAAATCAATCAGTATGCTAAAAATTATATATTGGAAATTTCAGAAATAGGACTGTTTTAA…
RPL43	S_Kluyveri	0.908108	0.02213	ATTGATTGATCGATTGCCGCTCTTTAAAAACATGATCTCTCACAAGACAAATGACCATGTCGGGTGTTGCAAGATAAAACTAAAAATATAGTTCCTGGTCTTGTAATTAACGCAGCCACTACATTGGAGGGTTCAGGGGGGGACATATAGCGGTTCAAAATTTGTTCATTAAATGTTTCTCTTTTTAGTAACCGCATATTCCATAAAGTGATGGTTACAGAATACCTCTTCCCCAACGTATTTGCAATGTCTCAGATAATCGCTCCAATTGCCAAAAGGCAGGTGGAAATAGGACATGAAAAAAATACGCGTCTTCCCGTGTAACTATGCGTGCAACGTCAAACATTTTTGGTTTTAAATGTCCCATAACATGAATGTGTGGGGGATTATTAAAGGGGC…	-
RPL43A	S_Cerevisiae	1.46758	0.0142212	AAACAGTAGCAAGGGACAGCGATAGTAGATATATCTCTCTAACAATGAATATACACTTAAGCTAGTAACAAATAATTGAATGGTTAGTATAGAGGAAAGTAAGTTATGCCGTTGCTCTGTGCCATTCAGCAGTATATGCACCATCGCTTGCTCTTTCGAGGGGTGGTTTCATACTATTTCACAATTTTTTTACTTAGTTCTTTTTTGGAACAACAGCCGGGTTACCAAAAGATCTCAAACGAAACTAAGACTGTTCAAATTTTCAAAGAATCCGTACATTTAGAAATTTTTTTTTTTTCCGCAAGAAATATCCTTGCTTTTTTTCACTTTTGTTAACTTTTTCTAACGCAACGCACGAGGCGGCTCACTCAGTGTTATGTGAGATATTGGGCTATATGG…	AAACAGTAGCAAGGGACAGCGATAGTAGATATATCTCTCTAACAATGAATATACACTTAAGCTAGTAACAAATAATTGAATGGTTAGTATAGAGGAAAGTAAGTTATGCCGTTGCTCTGTGCCATTCAGCAGTATATGCACCATCGCTTGCTCTTTCGAGGGGTGGTTTCATACTATTTCACAATTTTTTTACTTAGTTCTTTTTTGGAACAACAGCCGGGTTACCAAAAGATCTCAAACGAAACTAAGACTGTTCAAATTTTCAAAGAATCCGTACATTTAGAAATTTTTTTTTTTTCCGCAAGAAATATCCTTGCTTTTTTTCACTTTTGTTAACTTTTTCTAACGCAACGCACGAGGCGGCTCACTCAGTGTTATGTGAGATATTGGGCTATATGG…
RPL43A	S_Paradoxus	1.36958	0.0400817	AAGCAGCAGCAAGGGACAGCAACAGCAAATATGTCTCTGTAAGAATGAATATGCGCTTAAAATAGCAACTAATATTTGATTTATATGGAGGGGCTAAGTTATGCCGTTACTCTAGGCCATTTCAGCATATCTACACCATCGCTTGTTCTTTCGAGGGGTGGTTTCACACTATTCCACATTTTTTTTTGCTTAGAGTTCTTTCCCTGGGAACAATAACCGGGTTACGGAAAGATCTCAAAATGGGATCAAGACTGCCTTTTTCAAAGAATCCGTACATTTTATGCTTCTTCGCTTTTTTGTTTGCAGAAAATTTGCTTCCTTTTTTTCATTTTTGTTGCGACTTATTCTGACGCAACGAATGAGGCGCCTCACTCAGTGATATGTGAGATATTGGGCTAT…	AAGCAGCAGCAAGGGACAGCAACAGCAAATATGTCTCTGTAAGAATGAATATGCGCTTAAAATAGCAACTAATATTTGATTTATATGGAGGGGCTAAGTTATGCCGTTACTCTAGGCCATTTCAGCATATCTACACCATCGCTTGTTCTTTCGAGGGGTGGTTTCACACTATTCCACATTTTTTTTTGCTTAGAGTTCTTTCCCTGGGAACAATAACCGGGTTACGGAAAGATCTCAAAATGGGATCAAGACTGCCTTTTTCAAAGAATCCGTACATTTTATGCTTCTTCGCTTTTTTGTTTGCAGAAAATTTGCTTCCTTTTTTTCATTTTTGTTGCGACTTATTCTGACGCAACGAATGAGGCGCCTCACTCAGTGATATGTGAGATATTGGGCTAT…
RPL43A	S_Mikatae	1.44199	0.0414543	CATCAGTATTCAGAAAAACAGCAGCAATAAATATATGTCTCGAAGAGTGAGTGTGCGCCTAAACTAATAACTATTATATCTGATCTATACGAAGGGGGTGAATTATGCCGTTACTTTAGGCCATTTCAGCAATATCTACACCATCGCTTCTTCTTTCGAGGGGTGGTTTTTGCACTATTTTACAGTTTTTTTTTAACTTATTTCTTTTCTTTTTTTTTTTTTTTTGGCCAAGGTCCGGGTTATGCTAATTCTTTCAAAGAGTTCAGGACTGCTAAATTTCTTAGAAAAGCCGTACATTTAGGTAATTTTTTCACAGTTTTTGATTTTTTTTTTTTACATTTCACTTTCGCTTCTGTTCTTGCTCATACTGACGCAACGCAAGAAGCGCCTCATTCGGTA…	CATCAGTATTCAGAAAAACAGCAGCAATAAATATATGTCTCGAAGAGTGAGTGTGCGCCTAAACTAATAACTATTATATCTGATCTATACGAAGGGGGTGAATTATGCCGTTACTTTAGGCCATTTCAGCAATATCTACACCATCGCTTCTTCTTTCGAGGGGTGGTTTTTGCACTATTTTACAGTTTTTTTTAACTTATTTCTTTTCTTTTTTTTTTTGGCCAAGGTCCGGGTTATGCTAATTCTTTCAAAGAGTTCAGGACTGCTAAATTTCTTAGAAAAGCCGTACATTTAGGTAATTTTTTCACAGTTTTTGATTTTTTTTTTTTACATTTCACTTTCGCTTCTGTTCTTGCTCATACTGACGCAACGCAAGAAGCGCCTCATTCGGTAATGTGT…
RPL43A	S_Bayanus	1.54439	0.0319914	CATCAGTAGTGAAAAAACAGCGGCGGCAAATGTCTGTCCGTAATAATGAGTGTACGCTTAAATCAGTAACTAGTGTCTGCTCTTTCTGCGGGTTGAGTTGTGCCGTTACTCTGGACAATTACTGGTCTACACCATCGCTTGTTCTTTCGAGGGGTGGTTTCACTTTATTACGTTTTTTTTTTAACTTGTTTCTTTTTTGGCCAGAATCCGGGTTACCATATTTCCTTTTTTCGAGACCGCATTTCTGAAAAGATAAATCCGTACATGTTTATAATTCTTACACTTTTTTGTTGAAAATGTTTCCCACAGTTTAGTTTTTTCATTTTTTGGCGCGATTCGGTCCCGACGCAACGCAAGCGGCGCCTCATTCGGTAATGCGTGTGGTATTGGGTTATATGG…	CATCAGTAGTGAAAAAACAGCGGCGGCAAATGTCTGTCCGTAATAATGAGTGTACGCTTAAATCAGTAACTAGTGTCTGCTCTTTCTGCGGGTTGAGTTGTGCCGTTACTCTGGACAATTACTGGTCTACACCATCGCTTGTTCTTTCGAGGGGTGGTTTCACTTTATTACGTTTTTTTTTTAACTTGTTTCTTTTTTGGCCAGAATCCGGGTTACCATATTTCCTTTTTTCGAGACCGCATTTCTGAAAAGATAAATCCGTACATGTTTATAATTCTTACACTTTTTTGTTGAAAATGTTTCCCACAGTTTAGTTTTTTCATTTTTTGGCGCGATTCGGTCCCGACGCAACGCAAGCGGCGCCTCATTCGGTAATGCGTGTGGTATTGGGTTATATGG…
RPL43B	S_Cerevisiae	1.58907	0.024396	ACAAAACTACTTTAATTTCAATCACATTTTTGTTATCTGCCTGAAACGATAGCTGTACGGGTACGTTCTTGATAAATAAAACTCAGTGTTTAAAACTCTCTTTTTACATCTGTTCGCCGATGATTGCTTGCTCGGAGGTACTAGTCATCGGAATTGAGGAAATTCCTTTTCTCCTTTGTTTTCTCTTTATCCCCGCGTAAATACGCGGAATGCCAATAATCAAGTACACATTCTTTCTCCAAGTTGGCCAAAAAATAGTTCAAATTCTTTAAACTAAGCGCTATTAATTATTATTAATTATATAAGTTTGAAAATATCAATGCAGGACCCTATTTCTTCACGAGGGTGTATCCAGAAACGGTTTCTTATATAGTGTTGGCGCTCACTTTTTTCCTACCC…	ACAAAACTACTTTAATTTCAATCACATTTTTGTTATCTGCCTGAAACGATAGCTGTACGGGTACGTTCTTGATAAATAAAACTCAGTGTTTAAAACTCTCTTTTTACATCTGTTCGCCGATGATTGCTTGCTCGGAGGTACTAGTCATCGGAATTGAGGAAATTCCTTTTCTCCTTTGTTTTCTCTTTATCCCCGCGTAAATACGCGGAATGCCAATAATCAAGTACACATTCTTTCTCCAAGTTGGCCAAAAAATAGTTCAAATTCTTTAAACTAAGCGCTATTAATTATTATTAATTATATAAGTTTGAAAATATCAATGCAGGACCCTATTTCTTCACGAGGGTGTATCCAGAAACGGTTTCTTATATAGTGTTGGCGCTCACTTTTTTCCTACCC…
RPL43B	S_Paradoxus	1.49476	0.034047	ACATAACTACGTTAATTTCAACCAAAGTTTTTGTCATCTGCTTGACACGAGGGTAATAAGGGTACGTTTGATAAATAAATTCAGTGTTTAAAGATTTTTTTTTTACATCTGCTCGCCGACGATCTCTTGCTCGGGGGGACTATCATCGGACAGGGAAAATTCCTTTCTTCCTTAGTTTCTCCTTATCGCCGCGGAGGTACGCGGGACGCCAATAATCAAGTACGCATTCTTTCCTTAAACTAACTAATAAATAGTCCTGGTTCCCTAAATTGGCTAATAAACGTTCTAATTTTTTAAATTAGACGTTATGGATCACTGTTAGCCACATAAATATAAGATCAACGACACAAGACCCTTTTTCTTTACAAGAATATATTCAGGGACAGTCCTTATATAGTG…	-
RPL43B	S_Mikatae	1.63224	0.0277706	CCAATAATTACGTCAACTCTAACGAAATTTCTTGTTATCTGCGTGACATGGGAGCAATAAGGGTACAAAAAAAAACATGGCGTTCTCTTTTGGTATTTGCTGGCTGAGGATCCCTTGCGCGGAGGAACTGTTATCAAAAATAGAGAAAAATACTTTTTTGGTTCCTCGTTGCCATTGTGGTGTACCCAGAGCGCCCATATTCAATCAGACATTCTTCTATAAGTTGGCTAATAAGTAACTGTAATTTTTTGAAGTAGGAGTTGTGGGACGTTGTTGATGGTAAAGCTTTTACGAAGAGAATAGGCCTATTTCTTTTTACAAGCAAATTTTGAGAAATGGTTACTTATATAGCGTTTATGTTCACTTTTTCCTACCCACGTTTCGTATATGGAGTTACTA…	-
RPL43B	S_Bayanus	1.63137	0.0520009	TCCAACGTACCGTAAAGTCAATGCAATTACGATAGCATCTGTATTCATCACACCAATGAACACCATCTTCTCGGTTGTCCACGGGAGAGAAGGGGTGGGAGATAAGTGCGCAATCTCTACTATCCCAAGCCAAGAAAAAACCACTTAGCAGGTGATCTCTCTCCTGGAAGCATTATTGACAGAGAAAAAAAAGAAAAAAAAACTATTCTGAGTCTGGCCGAAATGATAATGCGTGGAACGCCACCAAGTTAACCTGCATTTCAATTCATATAACTTTTGATGTTTAGAGCTGTTGTGGTTTAACTGTATAGATTATGTTGGGAAAACAAGAACATTTTCATTTCTTGAGAAAAATTATGGCAGCACAGGTTGCTTATATATAGTAAACATTCGTTTCTT…	-
RPL5	S_Cerevisiae	1.95078	0.026396	GTAAATACAAAGTCATTCAATGTACATAAATACTGTTATGCTTTTGAATTAAGTAAAACACCATGACTTCATATTGAGATGTTTTAAGCATATAATCACGGCACCGAACTTCTTGTAATCATCAAATCTTTGTTTTCTAGCCGTCATAGAAATGAAGAAATGAAGATTCTTGTTCATGTGATACAGCTTTTCTAGACAGCTAACTTGTACATCCAGACATCCTAAAACACCCATAAAGCAAAAAAAATTATTGAAATATTCTCTTTTTTTTCTTTTTTTTTTTTCTGGTGGCTTTCAATGCGGAATCGCTCACATCCGAAAATTTCAGAGGCTTCACTTAGCGTCGCAGATCCCAGTAGTCGCCAGATGCTTTGAAAAAAAAAAAAATAAATAGAAAAG…	GTAAATACAAAGTCATTCAATGTACATAAATACTGTTATGCTTTTGAATTAAGTAAAACACCATGACTTCATATTGAGATGTTTTAAGCATATAATCACGGCACCGAACTTCTTGTAATCATCAAATCTTTGTTTTCTAGCCGTCATAGAAATGAAGAAATGAAGATTCTTGTTCATGTGATACAGCTTTTCTAGACAGCTAACTTGTACATCCAGACATCCTAAAACACCCATAAAGCAAAAAAAATTATTGAAATATTCTCTTTTTTTTCTTTTTTTTTTTTCTGGTGGCTTTCAATGCGGAATCGCTCACATCCGAAAATTTCAGAGGCTTCACTTAGCGTCGCAGATCCCAGTAGTCGCCAGATGCTTTGAAAAAAAAAAAAAAATAAATAGAAA…
RPL5	S_Paradoxus	2.00278	0.0361317	GTAAATACAAAAGTATCCAATGTACATATATACTGTTATGCTTTAAAGCTAGTTAAACACCAGGGTATGATATTGAGTGGTTTTAAGCGTATAATTCCGGTGCCTAACTTCTTGTAAGTCACCAAGTCTTTATTTTTTAGCGGTTATAGAAATGAAGAAGAGAAACTGCTTGTTTGTGTGACATGCATTTTATTTTGGACCGTTATTATTTACATCCAGACATTCTAAACACCCATAAAACGAAACTTTTTTTTTTTTGTTTTCTTCTGATAGCTTTTTAATGCGGAATCCTTCATATCCGAAAATTTCAAAGACTTCACTTGGCATCGCAGACCCCAGTAGTCGCTCGCTAGATGCTCTGAAAAAAAAAAAAAATAAATAGAGAAGTGTAGACATTGC…	-
RPL5	S_Mikatae	2.07158	0.0183234	GTAAATACAAGAGTATTCAATGTAAATATATACTGTTATGCTTCAAAACTAGATACAGCACAATGGCATGATATTGTGTGGTTGTAAACATATAATTCCGGAACCCTAGCTCCTGTAGGCCATCGTGTCGTTGATTTTCTAGCAACTATATAAAGAAGATGCTTTTTGTTCAAATGAAGACGTAATTATTTTTGGACGGCTATTATTTACATCCAGACACCTGAAACACCCATAAAATAGTAAGCATCCCAAAACCTTTCTTTTTTTCAATGGCTTTTCGATCGCGGAAATGTTCCATCCGCGAATCTCGGAAGCTTCATATTGACATCGCAGAGCCTCGTAATTGCTAAATTCTTTGAAAAAAAAAATAAATAGACAAGTTACAGATATAGTTAAAGT…	-
RPL5	S_Bayanus	1.90035	0.0265659	GTAAATACAAAAGTATACAATACAAATAGATATCATTGTACTTTAATAAAAATATGGTAATGATGTAAAACGGATTCATTTAGACAACATACTCCGGCATCCATACTTCTTCGAAATATATTGAATAGTTGCTAGCGTATCGGCGGCAGTAATGAAGTTGTTCAGTTCAGATGAGATGGGATGTTTTGGACGGTTTTCTATAACACCCAAACATTATGAAAACACCCATAAAATGGGATATTTTGAAAAAAATCTTTTTTTTTTCTATTTTTTGGCTGCCTTCTGATTGTGAGACATCCCGCATCCGAAAATTTCAAAGCGCTTCACTTTGGCATCGCAAATCTCAATAATTGCTAAATTGCTCTGAAAAAAATAAATAGAAAGGTTGTAGACATAGTC…	-
RPL5	S_Kluyveri	0.42219	0.00897247	TTCAATTTTGCCAGTCAACTATTGATCGATCGGTTTTGTTAATAATAGAGAGGGTCCTGCCCTGTATGATTTTCGCTAGCTTCTGTCCTTTTAAATAGTTTGTTGCAAATTGCACTTTAATTTTTGCTGCAATAGTTTCCTCAAGCCTCCTTTTTATTTGTCTTAACAGGTAACAGGGTCTTTACAGTTACTTCGTGGTGCTAATGTATTTTCGCTACTGCCTGTTAATAGAAGCCAAGATTTCCCCCCTGCAGCTTAGCCTCCCCCAACCACGTGAAAGGCTTGGTTTTTTTTTTCCTCTCTCAAATTGCCTACTCCGCTATCCGGATACTAAAGTTGTCAAAAAAAAAAAAACTAATAACTGCCACAAAAGGTAAAAAAATAACATGAGTAAGAAGT…	-
RPL5	K_Lactis	0.485938	0.00943375	TCAAATTGATCTAACCAATTTGTCGATCGTTTCAGAACTCAGCTCAATCATTATATATAGGAAAATTTCCCTTAAAAAGAAGAGAAGAGGAAGAAAAACAGAGCTAAACCACTTTAACGAAGGAACAGATATAAACGTAGTTCAGGAGAAAGAAGTATAGAAGATTTTTCGGAAATTACAAGTGACATCCGGCATACCTCACCGAACCATAGACTACAGAATTTGAATATTCATATTTGTGGCTTTGTTACAAAATGAGGCAAGCATCGTGATATTTTATCGGTATGAACAAGACACATGTCAAAAGGGTCCAAAAAAACGCTGCGCCAATTCAATAAAATAGGGAAGGAAATGAGCATTAGATTGAGTTGAGCCCCTGCGTTAGAATTCAGATTGAAG…	-
RPL6	S_Kluyveri	1.41816	0.0423813	GCTGCTTCCTTTCTCCTTTAGGCTTGCTCCATCCGGATGGCAGAAAATAGACAAAGTAAGATAAGTAAATTTCTCAAGGATGTGTTATGTACCTCTATTTCGATTTGAGTGGTCAGGCTGATCACTTGAGCACCTGCGTCTATACTGTCTGACGTGTGTGAGACATTGTATCCCAAAAAATGATACTATCTATCGTCCACTCTTCTGTGACTTTCAAAACCCAAACATTCGAATCCAAAATTAAAAATAAATATGTTTGGGTTTTACGGACTTGAAATGTTTTTGTTGCGTGTTCTGATTCCAACACAACGCGAGGTATCTGTCCCTACGTCGTTACGGTGGATCCAACCTGGTATCGTTCCTTCTCCAGTAGACGGGGAGGGGGATCTCCTGGCGGCC…	-
RPL6	K_Lactis	1.46795	0.0191183	ACACTATCCTTTGACCAGTTTAAATATACCGTTGTTACTTGAAACTATTTAGTTGACGAACATCTTCTTGTTTAATCTAAAACTATGGACTATCTTCTACAAGTGGCTTCCACGAACCAATAACCGGAGCAACGTGCTGAAATGGACGGATTACTTAATTATTGATTTATGTTCAAAGCTTGTGACTGTTTGCACCCATGCACCCATGAATATTTTATAATCACTCTACTATCCTTTTTAATTTTCTTCATTCCCAAAACAGGAATTTTACTCTCAAGTTTCCTGTGAAAATGATGGCCATACTACTGGCAGCCATTTTCCCGTTTGCAGCTGGGGAGTTTCCTGCCTGGCCGCAACCACACCAGACAGGACGCTCCCCGTTTGGTCCAACACTTCGAG…	-
RPL6	D_Hansenii	0.163569	0.00474039	ACGAGCAAGTGTGCTTGCTATTTATTTTTCTTTTCTGTTTTATATGTTATTATTTTACCGTTCTATGTCTCTCATTATTGTATTATTTACGCTTTAGTTAATATGACATTTTTATTTAACTATAGACCGTAACCGGTGAATCTTCCTCGAAGAACCGACAGACCGATGAGCGCTTTTTGAACCGAAAATCACTACTACCAACCGGTCTTACTGTCAACGTTATATCACGTCTTGCATTACGACCATGCTATGTTTCACATTAACCTTATACCTTATGCGGGACGACTATCGCTTTGCAGCCATCCTCCCCCGCCTCCATAAGTATCCCCCAAACCCATCCACCAACATCAGGTGCGGTGTGTGACTGCTTTTCCACAAGTCACATGGCACATACTATAC…	-
RPL6	Y_Lipolytica	-0.00456349	0.00589581	AGTGCGAGTATCAGTACAACTACGAGCAGTCGGCTTCGGGTGTGGAGTGCCTTCCCTTACCCATTAGTGTACGGTATTTGTACTGTAGATCTCGATGGTGGCATATGCATAGATTCGAATGGTTGTGTAGCCTAGACAGTGCCCATAAGGAGTTCCTATACAACATGTACAGTAGCATCTGAGGATACTCGCGTGTTCTTGGACAGCAACTAACCCTACTGTATGAGTACAGTATGAGTAACTTCTTTCCTTACTGTTACAGAAGAACGGATTTCATGTACTGTAAAAAGAAGGAGAAAAAAAAACAGTACAATACAGAATCACGCTAATGCACAAGTAAAATCCAACTAATGTTAGCTAGTTACTCAACCAATTCTAACTAATAACCACTCAGCCCTA…	-
RPL6	S_Pombe	-0.00172194	0.00620258	ATTCATGTAACATGCAATTTAATGAAAGATAAATCAAGGGTACGATTTAAAAATCCTAAAATTTGATTCATGAATTGCATTCCCAGCATTTTATTATTGCCTTTATCCACTATATTATGTTTTGGCACAAATGACGTTCTCAGTTTCTTCATTTTTACACTGCCTATTTTGCAGTATTTATCATTTGATTCAGGAATTATTATCGAAAGCAACTTCGGCTCAATTGACTACTTTAAAGGCATCTTTTTGTTTCAATTATATCCATATTCTTCGAACACTGGAATACGGAATTTTTAATCATATAACGATACATTACTTATAATTTTATCATTTTACCATTTCCCATGAGCAACGCTGTTCAGTGCTGGACTGCTCTAACTTTCGTCCTTGCCCTACCCT…	-
RPL6A	S_Cerevisiae	1.40858	0.0281176	AACAGTGAAAACTATTCTTTTATACGCTCAATAAGGGCACATTTGGTGTGTTAACAGGTGTCTTTTCTGTGTTTGTTATAATTTTGCGCTATTATTATATAACGTTATATTTACTATAATATATTACAACATATATTACAACATATTTCAACGCTCTCCTGTTACTGCTTAGGGAGAAGAAAGAAATGTGAAGACTGCTATTAAATCCGTACATTATTAAAATGTATGGATTTGTTATATTTTTCTTCAGTTTTTTCCTTAACCAGATTCGAAAAGCGGCCCGCCTAGACCATTGCGGTTGCGGCTAAAGCGTTCTGGAGAGGGCTTCTCCGCTGGGCGGACAACAGAAGCGAGAGACACGTTTCCCGTCTGGGAGGACTCACCGGATTTGTCCAGTTT…	AACAGTGAAAACTATTCTTTTATACGCTCAATAAGGGCACATTTGGTGTGTTAACAGGTGTCTTTTCTGTGTTTGTTATAATTTTGCGCTATTATTATATAACGTTATATTTACTATAATATATTACAACATATATTACAACATATTTCAACGCTCTCCTGTTACTGCTTAGGGAGAAGAAAGAAATGTGAAGACTGCTATTAAATCCGTACATTATTAAAATGTATGGATTTGTTATATTTTTCTTCAGTTTTTTCCTTAACCAGATTCGAAAAGCGGCCCGCCTAGACCATTGCGGTTGCGGCTAAAGCGTTCTGGAGAGGGCTTCTCCGCTGGGCGGACAACAGAAGCGAGAGACACGTTTCCCGTCTGGGAGGACTCACCGGATTTGTCCAGTTT…
RPL6A	S_Paradoxus	1.37115	0.00424552	ACCAGAAGTTCCTCAAGAATACACACAGTAATAAGAGTAGATTTGGTACGTTGATAAGTGTCTTTTTCCCCACTTGTTTAAATTTTGCGCTCTTACTATATAACATCATAGTTACTATAATTAATCATAACATATTTCAGCGCTCTGCCGTTAGTTTACTTTCACTTCGGAGAAATGCGAAGGTATTAGAAGACTGCCTGCGCGAAACACATCCGTACATCAGCTAAGAGATGTATGGATTTGTTATCTTTTTTATTTTTCATTTTTTTCCCCCAACAGACTTGAAGTTGCCGCGGCCTAGACCATTGGGCTCGCGGTTAGGGCGTTTGCGAAACAGCACCTCCACTGGGCGGACGACAGAGGCGGAAGATACTTTTCCTTGTCTGGAAGGACTCACCG…	ACCAGAAGTTCCTCAAGAATACACACAGTAATAAGAGTAGATTTGGTACGTTGATAAGTGTCTTTTTCCCCACTTGTTTAAATTTTGCGCTTTTACTATATAACATCATAGTTACTATAATTAATCATAACATATTTCAGCGCTCTGCCGTTAGTTTACTTTCACTTCGGAGAAATGCGAAGGTATTAGAAGACTGCCTGCGCGAAACACATCCGTACATCAGCTAAGAGATGTATGGATTTGTTATCTTTTTTATTTTTCATTTTTTTCCCCCAACAGACTTGAAGTTGCCGCGGCCTAGACCATTGGGCTCGCGGTTAGGGCGTTTGCGAAACAGCACCTCCACTGGGCGGACGACAGAGGCGGAAGATACTTTTCCTTGTCTGGAAGGACTCACCG…
RPL6A	S_Mikatae	1.29516	0.0147787	ACCCCTTAAGTTCTTTTCTTTTAAACATCTCAATAAGGGTGTATTCAGTAATTTTTATAAGTGTCTTTTTCCCGTCAATAACAGTTCATCTTTCCTGCTATATACCGTTATCGTTACTATAGTATATATTATAACAGATTTCAACTGTGTTTCTTTCATATTATATTGAAGACAGATTTTTGCAGACTGCGTAAGATATAAACGTCCGTACACCATGGAATAAGGGTGTACGGTTCTGTCTTCCAGCTTTATTTTTCAAGTTTTCCCCTATTATACTGCAAACAGACACCCGCCTGGATCGTTGTGTTCTCGTCTAGGACGTCGTGGAGTAGCTCCTCCGGGGAAAGGAGGAAATGGCCTTTCTTGTTTGGAAGGACTCACCAGGCCAGTCCATTCTCC…	ACCCCTTAAGTTCTTTTCTTTTAAACATCTCAATAAGGGTGTATTCAGTAATTTTTATAAGTGTCTTTTTCCCGTCAATAACAGTTCATCTTTCCTGCTATATACCGTTATCGTTACTATAGTATATATTATAACAGATTTCAACTGTGTTTCTTTCATATTATATTGAAGACAGATTTTTGCAGACTGCGTAAGATATAAACATCCGTACACCATGGAATAAGGGTGTACGGTTCTGTCTTCCAGCTTTATTTTTCAAGTTTTCCCCTATTATACTGCAAACAGACACCCGCCTGGATCGTTGTGTTCTCGTCTAGGACGTCGTGGAGTAGCTCCTCCGGGGAAAGGAGGAAATGGCCTTTCTTGTTTGGAAGGACTCACCAGGCCAGTCCATTCTCC…
RPL6A	S_Bayanus	1.38459	0.025397	AACACTATCTTTTTTCTTTAACAAGAACTCAATGAGTATACTTAGTGTATTTTGCGGATGTTTCTTCCCGTTTATAGTAATTCTGTACTCCTATTTTATACTATCTTAATTATCATAGTATATTACAACAATACTCTGGTTACCTTCAGCTTGTGCGGGGAAGGTAAAGGACTTTTCGGTACTATTTTTATTGCAATAACATCCGTACACACTCAGTATGTATGGGTGGCGAGCTTACCTTCCTTTTTTTTTTCCGCTTTTTTCAAAGCCCGTTTATAACAACCGCCCAGCTGAAATCGTTGCAACTCGTGGCGGGGCCTTTTGTAAGAAAATCCCTCTGGAAACGGGCGCCAGGAAGGACTGACAGCTGCTCTAGTCTGGAAGATCCTATCCAGCCGG…	AACACTATCTTTTTTCTTTAACAAGAACTCAATGAGTATACTTAGTGTATTTTGCGGATGTTTCTTCCCGTTTATAGTAATTCTGTACTCCTATTTTATACTATCTTAATTATCATAGTATATTACAACAATACTCTGGTTACCTTCAGCTTGTGCGGGGAAGGTAAAGGACTTTTCGGTACTATTTTTATTGCAATAACATCCGTACACACTCAGTATGTATGGGTGGCGAGCTTACCTTCCTTTTTTTTTTTCCGCTTTTTTCAAAGCCCGTTTATAACAACCGCCCAGCTGAAATCGTTGCAACTCGTGGCGGGGCCTTTTGTAAGAAAATCCCTCTGGAAACGGGCGCCAGGAAGGACTGACAGCTGCTCTAGTCTGGAAGATCCTATCCAGCCG…
RPL6B	S_Cerevisiae	1.43406	0.00385366	CGCAAGACTTTAGCAACACGATCCGAATGGTATACTCTTTTGCTAGCTCTTAGCGTTCTTTATGCCATACCTTAAAGGGTTAAGAGGTCAATTGTTCTTTTGTTTTTGCAGTATATCGAAGATATTTTAAAAATACGTCACTTTGTACGCAGATATCAGCGTAACAATAGGTGCGCGGAAATTACTTAGTTCCATAATACAAGAATCTGCTGACTTTGCGTCTGTAAGATAAGAAGGGTACGGCCCAGAGTATGAATCGTTGGGGGATGAAATCACTTTTTCATCTTCCTACAATTCATTTTGTCCTTGAAATACATAATAACAAAATATTAATGAAACTTGCATGTTACCAAATAACTTGAACTTCAGCACTTCTATTTGTATACCAGTATCACAGCA…	CGCAAGACTTTAGCAACACGATCCGAATGGTATACTCTTTTGCTAGCTCTTAGCGTTCTTTATGCCATACCTTAAAGGGTTAAGAGGTCAATTGTTCTTTTGTTTTTGCAGTATATCGAAGATATTTTAAAAATACGTCACTTTGTACGCAGATATCAGCGTAACAATAGGTGCGCGGAAATTACTTAGTTCCATAATACAAGAATCTGCTGACTTTGCGTCTGTAAGATAAGAAGGGTACGGCCCAGAGTATGAATCGTTGGGGGATGAAATCACTTTTTCATCTTCCTACAATTCATTTTGTCCTTGAAATACATAATAACAAAATATTAATGAAACTTGCATGTTACCAAATAACTTGAACTTCAGCACTTCTATTTGTATACCAGTATCACAGCA…
RPL6B	S_Paradoxus	1.36569	0.0240669	CGCAAGACTTTAGCAATACGATCCGAACGGTATACTCTTTTGGTAGCTCTTGGTGTTCTTTTTACGCTATACCTTAAAGGGTTAAGAGGTCAATTGTTCTTTTGTTTTTGCAGTATATAGAAGATATTTTAAAAATACGTCACTTTGTACGCAGATATCAGCGTAACAATAGGTGCGCAGAAATCGCTTAGTTACATAGTACAAGAATCTGATGACTGTGCGTCTGCATGATAAGAGTATGGTCTAGAGTATTAATCTTTAGGAAAGGTGAGCATCCTTGCATTTTCCCTATCATTCATCTCCCCTTGGAATGAATGACATATCAGTGAAAACGCGCATGCTAAATCTAATACACTGGTTTCAGCACTTCTGTATGCGGAAACAGTATTCCATCAATCT…	CGCAAGACTTTAGCAATACGATCCGAACGGTATACTCTTTTGGTAGCTCTTGGTGTTCTTTTTACGCTATACCTTAAAGGGTTAAGAGGTCAATTGTTCTTTTGTTTTTGCAGTATATAGAAGATATTTTAAAAATACGTCACTTTGTACGCAGATATCAGCGTAACAATAGGTGCGCAGAAATCGCTTAGTTACATAGTACAAGAATCTGATGACTGTGCGTCTGCATGATAAGAGTATGGTCTAGAGTATTAATCTTTAGGAAAGGTGAGCATCCTTGCATTTTCCCTATCATTCATCTCCCCTTGGAATGAATGACATATCAGTGAAAACGCGCATGCTAAATCTAATACACTGATTTCAGCACTTCTGTATGCGGAAACAGTATTCCATCAATCT…
RPL6B	S_Mikatae	1.46268	0.0150989	CGCAAGACTTTAGCAATACGATCTTAACAAAATGCTCTTCTGGTTGCTCTTGATCTTATTCCTGCTATACCTTAAAGGGTTAAGAGGTTTAACTGTTCTTTTGTTTTTGTAGGATATTGAAGATATTTTATAAATGCGTCACTTTGTACGCGCATATCAGCGCAACAATAGGTGCGCTGAAATCGCTTTATTATACAACACAAGAATTCGCTAAATTTGACCCTGATGATAAGAGTGCACTTTGGTGTCTTAATATTCAGGAAGGATGGGCATCTTCCCATCATTCATCATTCATTTCCCTCCTTGAGATGTATGACAGAATACCGAAATGTGTAATACTTCGGTATCAGTATCTCTATGTATGCACCGCTAAGTCATCCTTCCATAAGTTTGATTTTG…	CGCAAGACTTTAGCAATACGATCTTAACAAAATGCTCTTCTGGTTGCTCTTGATCTTATTCCTGCTATACCTTAAAGGGTTAAGAGGTTTAACTGTTCTTTTGTTTTTGTAGGATATTGAAGATATTTTATAAATGCGTCACTTTGTACGCGCATATCAGCGCAACAATAGGTGCGCTGAAATCGCTTTATTATACAACACAAGAATTCGCTAAATTTGACCCTGATGATAAGAGTGCACTTTGGTGTCTTAATATTCAGGAAGGATGGGCATCTTCCCATCATTCATCATTCATTTCCCTCCTTGAGATGTATGACAGAATACCGAAATGTGTAATACTTCGGTATCAGTATCTCTATATATGCACCGCTAAGTCATCCTTCCATAAGTTTGATTTTG…
RPL6B	S_Bayanus	1.3802	0.0176673	TGCAAGACTTTAAACAACACGTTCCCGATGGTATGTTCTTTTGCTGGGCCTTTGCGTTATTAACATCATTCCTTAAGGGTTAAGAGGTTGACTGTCTCTTATGTTTTTGCAGTATCGAGGCAACCTTAGATTGCACGTCACTTTATACGCTGCTATCAGAACACAATAGGAGCCCAGAAACCTACTTAGCTGCATAAAGCACAGGAATCCACTGGCTCTTTGACCACCCTAGAGGGTACATAACTACAGAATTTATGTTCTAGGAAGCTCAGTACAGCCTGTACTTTTCTTGGCGCTCCATCCACAGGCGTGGAAGGCATCAACAATAATAAACACCCAGAGTCTGCCTTAACCTTTCTAGTTCATATTCGCATGTCAATGATGCGTTGCTTAGCAAGC…	TGCAAGACTTTAAACAACACGTTCCCGATGGTATGTTCTTTTGCTGGGCCTTTGCGTTATTAACATCATTCCTTAAGGGTTAAGAGGTTGACTGTCTCTTATGTTTTTGCAGTATCGAGGCAACCTTAGATTGCACGTCACTTTATACGCTGCTATCAGAACACAATAGGAGCCCAGAAACCTACTTAGCTGCATAAAGCACAGGAATCCACTGGCTCTTTGACCACCCTAGAGGGTACATAACTACAGAATTTATGTTCTAGGAAGCTCAGTACAGCCTGTACTTTTCTTGGCGCTCCATCCACAGGCGTGGAAGGCATCAACAATAATAAACACCCAGAGTCTGCCTTAACCTTTCTAGTTCATATTCGCATGTCAATGATGCGTTGCTTAGCAAGC…
RPL7	S_Kluyveri	4.70816	0.101964	TGTGATTATTTGACTTTTAGTTCCTCTAAAATGACTAAGCCAGAAGCTCGAAGTCTGAAAAGAATGCACATTCTATGCAGGACATATAATACATCAAGAATCATACAACGTACCCAATGATATAGAAAGCGTTGAAAAAGCCCTAAAAAAACTGGATTTCTCTGTGAAAGAATTCTGGTGTTTATGGAGAAAAAACTTATAAAAAACTTTTCTTCCTTTGAATGATTTTCTCTTTCATCCACTACTTTGTTAAGGCATATGGATAAGCGTGCATGCTACTCAGTGTGAGGACACATTAGTGTATGCGCATATCTCTCCTCTAACCTTGCTCACTCGAGTAAAACATGTAAAGTGATGACAAATGCCCTTGTGCATTTAAATGTGACTAGCCACGGCGAT…	-
RPL7A	S_Cerevisiae	1.80314	0.0636246	GGCCTTTGCACCGTGCCACTTCATACACAGTGAAAATAGTCACGTAAACCGTTCATGATATCCTTCAATTCAAAATAATTCAGCATTGATGTGCGTCTACGACAATCGCTAGTCCTAACTTTATTTTTTTTTTTTTTTTTTACATCTGCCGTCACCCTTGCGATGAACGAGAAAAAAACCGCCTTTCGAAGTATAAAAAGGATGAACTCGATATTTCAGCAACACATTCTTTACCTTGGTCTTTTCTCATTTTGTTACAAAAATATATACTTATAATAGCACAGGTTTTATTATTTTAGATATGCATAACACAAAATAATGTGCGTGGCAGCGTTGATAATAACGAGCTAATGTCTTATATCTCATATGAGTTCATGTGATATTTCATGTTACAGCTCA…	GGCCTTTGCACCGTGCCACTTCATACACAGTGAAAATAGTCACGTAAACCGTTCATGATATCCTTCAATTCAAAATAATTCAGCATTGATGTGCGTCTACGACAATCGCTAGTCCTAACTTTATTTTTTTTTTTTTTTTTTACATCTGCCGTCACCCTTGCGATGAACGAGAAAAAAACCGCCTTTCGAAGTATAAAAAGGATGAACTCGATATTTCAGCAACACATTCTTTACCTTGGTCTTTTCTCATTTTGTTACAAAAATATATACTTATAATAGCACAGGTTTTATTATTTTAGATATGCATAACACAAAATAATGTGCGTGGCAGCGTTGATAATAACGAGCTAATGTCTTATATCTCATATGAGTTCATGTGATATTTCATGTTACAGCTCA…
RPL7A	S_Paradoxus	2.02674	0.0390113	GACCCTTCGCTTGCCACCTAATACACAGTGGATGTAGTCACGTAAACCTTTTACGATATCTTTCAACATAAAATATGGTTCACCGTTGATATGCGTCCTCGACGATCGCTAGTCCTAACTTTATTTTTTTCGTCTGCCGCCACCCTCCCAATCAGCGAGAAAAAAACGCGCCTTTCGAAGTATAAAAAGGATGAACTCAATACTTCTGCAACACATTACTTTACTTTATTCTTTCCTCGTTCTTATGAAAAATCATATACAGTATCGCAGGTTTATACTATCTAGATATGCATGCTACAGACAACGTACCGTAGTAGCATTATTACAGCGAGCTAATGTTTTATACCTCATATGAGTTCATGTGATATTACAAGTTACAGCTCAGATATGTAAACTTTC…	GACCCTTCGCTTGCCACCTAATACACAGTGGATGTAGTCACGTAAACCTTTTTTCGATATCTTTCAACATAAAATATGGTTCACCGTTGATATGCGTCCTCGACGATCGCTAGTCCTAACTTTATTTTTTTCGTCTGCCGCCACCCTCCCAATCAGCGAGAAAAAAACGCGCCTTTCGAAGTATAAAAAGGATGAACTCAATACTTCTGCAACACCTTACTTTACTTTATTCTTTCCTCGTTCTTATGAAAAATCATTTACAGTATCGCAGGTTTATACTATCTAGATATGCATGCTACAGACAACGTACCGTAGTAGCATTATTACAGCGAGCTAATGTTTTATACCTCATATGAGTTCATGTGATATTACAAGTTACAGCTCAGATATGTAAACTTT…
RPL7A	S_Mikatae	1.689	0.0573213	GGAATTTCCAACAATTGGGTAATATAACATGAAATAGTTAAATATAACTTTCATGATAGCTTTGAACATAAAATAGCTAAATCGTTGATATGAATCCATGACAAATCGCTAGTCCTAACTATTTTTTTTTAGGTCTGCCGCCGTCATGAATGAAAAAAATGAAAAACTCGCTTTTCGAAGTATAAAAAGGATGAACAGAACAAGTTTACGACACTCTTGATCTTTTCTTCTTTCCAAATTTAAATATAATCTTAAACTAGAGAGGTGTATGGTTTTATAAGTATTCAAATGATAAGAGATATAGTGTGGCAACATAAATATGACAGGTAGATGTTTTATGTCTCATGAGTTCATGTGATATTTCACGTTACACCTCAAATATGTAAATCTTCGATTTAA…	GGAATTTCCAACAATTGGGTAATATAACATGAAATAGTTAAATATAACTTTCATGATAGCTTTGAACATAAAATAGCTAAATCGTTGATATGAATCCATGACAAATCGCTAGTCCTAACTATTTTTTTTTAGGTCTGCCGCCGTCATGAATGAAAAAAATGAAAAACTCGCTTTTCGAAGTATAAAAAGGATGAACAGAACAAGTTTACGACACTCTTGATCTTTTCTTCTTTCCAAATTTAAATATAATCTTATACTTAAAAGGTGTATGGTTTTATAAGTATTCAAATGATAAGAGATATAGTGTGGCAACATAAATATGACAGGTAGATGTTTTATGTCTCATGAGTTCATGTGATATTTCACGTTACACCTCAAATATGTAAATCTTCGATTTAA…
RPL7A	S_Bayanus	1.93739	0.0225823	AGCCTATTTAATATTCTGCTTAATACTCAACTACTCAGTCATATAAGCTCCTTTAAACATTATTTAGTACAAGAAAGCTCATTGTTGTGCATAGTTTACGATCGCTAGTCCTAAGTTTTTTTTTTTCATTTTTTTTTTCCATGTCAGTCGCCCTCGGTAACGAAGACTTTTTGCTTTTCAAAGTATAAAAAGGAAGCATACTATTCCAATACTTTTGCTTCTCCCTTCTATTCCCAACTTGAAATAAAGAAACAAACTTCAACAAATTAGGCTGCGAATCGCCAGGCCTGCATAAGCCAAGGATAAAAACTTAGCATGGCTAACACATTGGAGCTAATGTTTTATATCTCATATGAGTTCATGTGATATATTACGTTTTGCAGCTCAAAAATTTGTAAG…	AGCCTATTTAATATTCTGCTTAATACTCAACTACTCAGTCATATAAGCTCCTTTAAACATTATTTAGTACAAGAAAGCTCATTGTTGTGCATAGTTTACGATCGCTAGTCCTAAGTTTTTTTTTTTCATTTTTTTTTTCCATGTCAGTCGCCCTCGGTAACGAAGACTTTTTGCTTTTCAAAGTATAAAAAGGAAGCATACTATTCCAATACTTTTGCTTCTCCCTTCTATTCCCAACTTGAAATAAAGAAACAAACTTCAACAAATTAGGCTGCGAATCGCCAGGCCTGCATAAGCCAAGGATAAAAACTTAGCATGGCTAACACATTGGAGCTAATGTTTTATATCTCATATGAGTTCATGTGATATATTACGTTTTGCAGCTCAAAAATTTGTAAG…
RPL7B	S_Cerevisiae	2.73342	0.0220203	AAGTGCGGCGCTTTAGCTTCAAACTGACTCATGGTTGCGTAAAAACATGGTTGCTTTTTGTCGTTTTCCTCGAAAGGCTTTACCTTTTCATTAAGCCGCTCCATTTTAAAATGTTTTAATAAATCCACTTTTTTCCGGCGCATAATGGATCCAGAAAGGAACTGGCAACTAAATCCGTACATTTCTGAAATTATTTCAGTTCGCAGATTATTTTCTCAGTTTTACCGTATATTCTTATGTATTACAGTTGAGGTACCCACACGCGCACTTGAAAAGTATATAAAAGTGAAATATTTCAGAGCTCTTCCTATTGCTTTTTCAATAGAGGCTTAAATCTTCCTCGTTTGTAGAGTAAGTAGACCCATATTACAAATCTCCATCAACGTCATA	AAGTGCGGCGCTTTAGCTTCAAACTGACTCATGGTTGCGTAAAAACATGGTTGCTTTTTGTCGTTTTCCTCGAAAGGCTTTACCTTTTCATTAAGCCGCTCCATTTTAAAATGTTTTAATAAATCCACTTTTTTCCGGCGCATAATGGATCCAGAAAGGAACTGGCAACTAAATCCGTACATTTCTGAAATTATTTCAGTTCGCAGATTATTTTCTCAGTTTTACCGTATATTCTTATGTATTACAGTTGAGGTACCCACACGCGCACTTGAAAAGTATATAAAAGTGAAATATTTCAGAGCTCTTCCTATTGCTTTTTCAATAGAGGCTTAAATCTTCCTCGTTTGTAGAGTAAGTAGACCCATATTACAAATCTCCATCAACGTCATA
RPL7B	S_Paradoxus	2.30046	0.0657048	GGGTACGGCGCTTTAATTTAAACCGACTCATGGTTGCGTACAATGGTGGTTGCTTTTTCTTGTTTTCTCGAAAGGCTTCACCTTTTAATTAAGCCGCTCCATGTTGGAACGTTTCCATTTAACCATTTTTTTTTCTCGCGTAGAACCAAATGGACTAGCAATTAAAATCCGTACATATTTAGACCCATTTCAGCTCGCCTATTATTTTTTCAGTTTTGCAGTTCGCTCTTGTATACATTACAGTACAGGTACATCCACGCGCACCTGGAAAAGCGTATAAAAGTGAAATAATTCAGATTAATTTTTATTGTGTTTTGGGACAGAGCCTGGTAATTATTGCAATACACGCTGTAAAGTAATTTGATAATAAAAATCCGCATCCACAACATA	GGGTACGGCGCTTTAATTTAAACCGACTCATGGTTGCGTACAATGGTGGTTGCTTTTTCTTGTTTTCTCGAAAGGCTTCACCTTTTAATTAAGCCGCTCCATGTTGGAACGTTTCCATTTAACCATTTTTTTTTCTCGCGTAGAACCAAATGGACTAGCAATTAAAATCCGTACATATTTAGACCCATTTCAGCTCGCCTATTATTTTTTCAGTTTTGCAGTTCGCTCTTGTATACATTACAGTACAGGTACATCCACGCGCACCTGGAAAAGCGTATAAAAGTGAAATAATTCAGATTAATTTTTATTGTGTTTTGGGACAGAGCCTGGTAATTATTGCAATACACGCTGTAAAGTAATTTGATAATAAAAATCCGCATCCACAACATA
RPL7B	S_Mikatae	2.41608	0.0443877	GATACAATGTTTTGACTTTAACTGTTATCTTTTTGAAAATCCTGGTTGCTCTTGTTTTTCTCGAAAGGCTTCACCTTTGAAAAGCCGCACAACTTAAAGACAATTATGTTTGAATACTGGAATTTTTCTTCAAAACATACAGTGTCCAAAATTCTGCCTGCTTTTAAATCCGTACATTTATTTAAACCCACCTGACTTCTTCATCTATATTTTCCGTATACAGTTTACATAATTGCCCGTTACAGATTTTTTTTTTCACGCGCACTGTGAAAGGAATATAAGGTGAAGAATTAAACACTTTCTTTTTCAAATGTTACTGGCAGTCACGTTAGAACTTCTTTCAAATATGTAAAATAAGAGGTAAAGTAAGAGGTTAAATAATACAAGTATCCATCTGTA…	GATACAATGTTTTGACTTTAACTGTTATCTTTTTGAAAATCCTGGTTGCTCTTGTTTTTCTCGAAAGGCTTCACCTTTGAAAAGCCGCACAACTTAAAGACAATTATGTTTGAATACTGGAATTTTTCTTCAAAACATACAGTGTCCAAAATTCTGCCTGCTTTTAAATCCGTACATTTATTTAAACCCACCTGACTTCTTCATCTATATTTTCCGTATACAGTTTACATAATTGCCCGTTACAGATTTTTTTTTTCACGCGCACTGTGAAAGGAATATAAGGTGAAGAATTAAACACTTTCTTTTTCAAATGTTACTGGCAGTCACGTTAGATCTTCTTTCAAATATGTAAAATAAGAGGTAAAGTAAGAGGTTAAATAATACAAGTATCCATCTGTA…
RPL7B	S_Bayanus	3.66606	0.198964	AGTTACGCTGCTTTGGTTTTTTAGCCGACTAATCATCACAGAAATGTGGTTGCTTTTTTCTTGTCGTTCTCGAAAGGCGTTACTTTTTCATTAGCCGTTTTATGCGGATACTATTTTTATTTATTAGTATTTTTTTTTTTGGACGCGAAAAAAAAAAGGCTACACAATCCGTACATTTCTTTCAACCCATCTCAACTCACTTTGACTTATTTTTCTTTTTTGTTTTTTTTTTTGGCATATTTTGTTTTGAGAATCTCAATCTTCCGCACACGCGCATTTGGGAAGAGCATATATAAAGTGAAATATTTCATCATTATTCTTAGATGTAAGACTATTGTTAATCCTTAAAACTACCTTTCTTCGACCATCGTCCATAAACAAAACATTAAGTCCCATCAA…	AGTTACGCTGCTTTGGTTTTTTAGCCGACTAATCATCACAGAAATGTGGTTGCTTTTTTCTTGTCGTTCTCGAAAGGCGTTACTTTTTCATTAGCCGTTTTATGCGGATACTATTTTTATTTATTAGTATTTTTTTTTTTGGACGCGAAAAAAAAAAGGCTACACAATCCGTACATTTCTTTCAACCCATCTCAACTCACTTTGACTTATTTTTCTTTTTTGTTTTTTTTTTTGGCATATTTTGTTTTGAGAATCTCAATCTTCCGCACACGCGCATTTGGGAAGAGCATATATAAAGTGAAATATTTCATCATTATTCTTAGATGTAAGACTATTGTTAATCCTTAAAACTACCTTTCTTCGACCATCGTCCATAAACAAAACATTAAGTCCCATTAA…
RPL8	S_Kluyveri	2.1743	0.0466224	GTGCCAAAATATCATATGTTCACTATTTTTGAATTTAATAACTTTGTAATCTAATATAGGTAAATTCACTTAATACTTCCACTCTTGCGTTCATCGTTACGTAGCCACGAAAGGGTTTTGCTTGCAAACAACCCAAGCTCGCTGCGTTTACATATCTGCAAAAAAAAAGGAGGCAACTTATGACCGTCAATATTCAATGTATGGGTTCAATAGATAACACCCATAACCCGGAATACATCACAAAAGAAGAATAAAATAAAATTTTCTACGATGGGAAAACCACAACCCATACACAATGGATGCAACTGAGAAGGGACGCAATCTCCAGGACTCCAATAATCACTATAAATTTTTGTCATTCATTGATTTTGTTAAATCTGTTACATCATCTTCATTATT…	-
RPL8	K_Lactis	1.08763	0.0227794	GTCAAACCAAACAATCTAATATTATTTACATTCAGATTAATATGTATTATTGTAAACAAATCATAGAATCGTGACTCCAAGAGCTACCTACACTTATGAACTACCAGCCATTACTGTTCCCTGATTGATTGAAGAAGGAGTGAAAACAAAAGAAAAGCGTAGTAAACTGACCCAGTTAAGGAGTTAGGAAAACAAAACGGGACTGTTCGTATATAACAATCCGTACACCCACATAATTATAAGAGTGTTCAATTTTCAAAAAATAATTACCAAATGGAGAAATGGTTGTATATATGCAATGCATGGGTTTATTTCAAACTGTTACCAGTTGGTTTTTTCCAGCCTACCTTACCCACTCGAACTTCAGTTTGTCACTTTCTCTAATCGGAGGAATAACCT…	-
RPL8A	S_Cerevisiae	3.47186	0.084451	ACATAAATAATTTCTATTAACAATGTAATTTCCATAATTTTATATTCCTCTCCACCTTCTATTGCATCATGTACTATTCAAATGACTGTAACACTAGTATTATGAAGAAAACACCCAAACATATCTAGGCCATCAGATTTTTTTTTTTTCATTTTTCATTTTTTTCTCATTTTCTTATTTATTTTTATTGAAAAATAATAACCGACGCAAACAAATTGGAAAAACCAACGCAAAAAAAAAAAGACGCTAAATTGTTTATAAAGGCGAGGAATTTGTATCTATCAATTACTATTCCAGTTGTCAGTTTACATTGCTTACCCTCTATTATCACATCAAAACAACTAATTCGAA	ACATAAATAATTTCTATTAACAATGTAATTTCCATAATTTTATATTCCTCTCCACCTTCTATTGCATCATGTACTATTCAAATGACTGTAACACTAGTATTATGAAGAAAACACCCAAACATATCTAGGCCATCAGATTTTTTTTTTTCATTTTTCATTTTTTTCTCATTTTCTTATTTATTTTTATTGAAAAATAATAACCGACGCAAACAAATTGGAAAAACCAACGCAAAAAAAAAAAGACGCTAAATTGTTTATAAAGGCGAGGAATTTGTATCTATCAATTACTATTCCAGTTGTCAGTTTACATTGCTTACCCTCTATTATCACATCAAAACAACTAATTCGAA
RPL8A	S_Paradoxus	2.31757	0.0422806	ACATTAACCTTTATCACTCTTCTATTAATAATAATGTAATTTCAATAATTTCATATTCTTATCAGCCATGTGTTATATATACTGTTTAAATGACTGCAGTACTGAAAAGGTAAGGGTGAAACCCAAACATGTTCCGACCATTCGATATTCTTTCATCCTTCATCTTTTTTTCATTGCTTGAAAAAAAAAAAAAAACGGACGCAAACGAATAGGAAGCAAAAAACGGACGCAAAACATGATCGCTGAATTGTTTATAAAGGTGAAGTAGTGTGGATCCGTTGAATATTGTTCTTCTGATTGACATTGTACGTTGTTTATTTTTGACTACACTATCCCCAGACAACTAAAGAATA	-
RPL8A	S_Mikatae	3.12058	0.043539	ACCACGATCATTCTTCTATTCACAGTTTAATCGAAATATAGAAATCCATATTCTTATCCACCGTGTATTATATATAGTATTCAAATGACTGTAAAACTAAAAATGTAAGGGTGCAACCCAGACACAATTTGACTCCAACGACTTTTTTGCATTTTCTTCTCTTTTCTTCGGAAAATAATACCGACGCGAACCGCGAGGAAACAATAAAGTAACGCAACGCAAAAAAACTTACCAGCATTGAGTTGCTTATAAAGCTAAGGCAACTTGGTTTTGTTCATTTTGGCTATCAGCAATTAACTTTCTTAGGGTGTTTCCATAAAATAAATATATCAATAACCAAAGCAAA	-
RPL8A	S_Bayanus	3.18913	0.0618489	ACTATCTGTAACTGGTATTAATGTTCTAATGTAAATTCAAATTCATATTCATATCAATCATGTTTTATATACACTTTTCGTATGACTGCAGATATAAAATGTAAGGGTGTAACCCAAACATAACGCTCGCTAAATAATTTCTATAGTCTTCACCCAGTTTTGAAAAAAAAAAAAAAAGGCGACGCAACAAAAAAAATACGCACACTGATATTAACTGGCTTATAAAGGTGAAATAATTTGTATACCTCAAAAACAGTTCCTTTTACGATATATAAATTTTTGAAGATCATTTCTTGAGGAAAACAAATAAACAAAGACAATCAATCAAAA	-
RPL8B	S_Cerevisiae	1.48146	0.007757	TCCACTTCCTGTTTTTCTTGGTGGAAAAAGTGCAATATATCTTGTTTTATCTTTTCCGCAAAAAGGGCCGGGCAATCTTGCCGTCTCCGGATTCACACTGTTCCCCGCTTTTAACTACTGAATTGCGCCTTCTCACTATGAGATCTGATCGAAAATAGAGGAAGCTACAGAAGATACCTTTGTTGGACGGCACATTAAAGAAACATCTCTGAAGCATTTTAACATATATGGATCCGTCTTTCTTTCTTCTGCTAAGGGACGGTATTACACGACATATATTGTCAAGCGCAACAGAACTAATTGACTTTAGGACGAGAATAATATAACTTTATGACACTCTGCTCTCCTACTACTTCTTATGCCGTAACTCTCTCCGTCCCTCAGTCCGTTGCTGCCTTT…	TCCACTTCCTGTTTTTCTTGGTGGAAAAAGTGCAATATATCTTGTTTTATCTTTTCCGCAAAAAGGGCCGGGCAATCTTGCCGTCTCCGGATTCACACTGTTCCCCGCTTTTAACTACTGAATTGCGCCTTCTCACTATGAGATCTGATCGAAAATAGAGGAAGCTACAGAAGATACCTTTGTTGGACGGCACATTAAAGAAACATCTCTGAAGCATTTTAACATATATGGATCCGTCTTTCTTTCTTCTGCTAAGGGACGGTATTACACGACATATATTGTCAAGCGCAACAGAACTAATTGACTTTAGGACGAGAATAATATAACTTTATGACACTCTGCTCTCCTACTACTTCTTATGCCGTAACTCTCTCCGTCCCTCAGTCCGTTGCTGCCTTT…
RPL8B	S_Paradoxus	1.40268	0.00927029	TCCACTTCTCGTTTGTCTTGATGAAAAAAGTTCAATATCTTATTTTTATCTTTTCCGCAAAAGGGGCCGGGCAAACTAACCGCCTCCGGATTCTCAGTGTTCCCCGCTTTTAACTACTGAATTGCGCCTTCTCACTATGAGATCCGATCTAGGATAGAGGAAGCTACAAAAGTTACCTTTGTTCGGACGGTGCATTGAAGATACCTCTCCAAATGATTGTAACATATCTCGGTTCCTCTTTTTTCTTTCCTAGAGCAAGGCACTGTAAAACACGGCTCATATTCTTAAGTGAATCAAAACTAGCTGGCCTTAGCACGTTTAAGAATTTGAACTTATGACACCCTATTCTTCTGCCACTTCTTGTGTCGTACTCCCGCTGTCTGTTGCGTTCTTTTTGTA…	-
RPL8B	S_Mikatae	1.57087	0.0158894	TTCACTTCTTGTTTTTTCACGAAGAAAAAAGTTTAATATATTCTTGATTTATCTTTTTTTCTCAAAAGGGGCCGAGCCAAACTAACATTTCCATATTATCATTGCCCCGGCTTTTCAACCACTGAATTGCGCCTTCTCAGTGTAAAACATGGTATTGAAATAGGAAGCAGTTGAAATCACCTTTATTTCTAACGGTACGTTTGCGCTTCTGCTAGCGGTGATGCGCCTTTACAATGGTTGTAACACATCTTGAATCTCTTTTCTCCTCTTCTTATTTTTTTTACCTGAGAAAGGTCATGTAAACACGACGACATACTTATAAGCATATCAGCAAAAACCTGTTTTGGCTTGGGCAGTTTCTAAGTTTATGACACACCTGTTCCTTGATACTACTTGCCT…	-
RPL8B	S_Bayanus	1.62121	0.0393584	TCTTTTTTCTTTTTTCTTGATGAAAAAATGAAGAATCTTGTTCTATCGTTTTTTCGCAAAAGGGGCCGAGCTAACAGTCTCCACATTCACGTATTCCCCCGCTTTTTAGTTTTCTTGATATCGCACATTCTTTTTCTGAGATTGACCTGGAATAAAGGAAGTTGCCAAAAGTTGCCTCTGTTGGAACGGCACTTTTTGGGTTTTGCCCAATAGAGACGCCTCTTTAGCACTTGGAACTTACCGAGGTTCCTTTTTCTCCATAATTTGCCACTGTGGGGTTTGTGAACCTGTCGCGCATACTCCAACATGCAAGCAGCAAGCAGCTTTGACGCAGAAACATCAGAGATATTAACACCCACGTCCTTGCCATTCCTTGCTCTTGTACGCCACACACCCGCT…	-
RPL9_v1la	K_Lactis	0.837707	0.0204932	TTAATTTGGTCGTTTTGGATGTCTGACACAATTCCCTTGTTGTGAGTCAGATATTCTTTGGGATGGGGAATGGATCATTGAAAAACTGCGGGACTGTTATTCTATTATGTACAGGTGTTCCAAAGAGGAATTTTTGCGGTTTTTTTTTTTTTGAGATGAGAACTACAACCGCTAGGTTCCACAGAAAAAGTCGTTGATACTGTGAAATGTCTGGGTGTTTGGTGAAAAATTTCTGAAGTCTCATTTCCTGCGTCTGCAAGATTGACCAACTTTCACCAATTGCAAAGCTCTAGGTTAACAAAGATGATGTGCAAGCATTCCCAGTTATACTTGGCTCCTGCATTGTTTGTTGAAACAGGCGTTAATTACAGTATTACAGTATTACAGTTGAGTGCATTT…	-
RPL9_v2kl	S_Kluyveri	2.52857	0.0551851	ACAAGTGTAATATATGTAATTTTTTTTTGTATATAATGAATGGGCATCACAGGCAGAATGCTTTTGAGTTTGTGGGATTCCAAAAGACAATCTCGTTTTACCGTTCAAGCCAGTTGGCTGAAAATCAAATTATTGAGTTACCCGCACATAATTCGGCCAATATGGGGACTCAACCTGAAGAAAATTTTTCCTGTTCAAGAACGAAGGAAAAAAAAAAGTATATAAGACAGAGTGAAAAATTTTTCACCTCGATCTTTCGTCAATTATTTTTCCAGTTCACCACGAAGCTTTACAAAAA	-
RPL9_v2la	K_Lactis	1.44902	0.0133613	TGAACCCCCAAAAACGCTACTGGCAAGATTGTAAAATTACGTTAAAAACGAACACATAATAGGGGAAAGAAACAGACTGCTTATAAAATGTAGTGAATTCCACGTATTACCTTTAATAAATTCTTTTGAAAAACCTGACGATATATACAGAGTACTTAAAGACGATATGTATATAGCTCAAAGTATTTGAATCAATAACTGACGACATGCAAATACATAATATCGTAAAACACCAAATATATGCACCTTCATAACACCCACACGTCTCACACAACATATTGGGACTGTTTTCTTTACTTCTGTTTTGAATTACGACGCAAATTAAATTTCCCTTTTGAAAAAATTTTCAAATGAAAAAAAGCTGTCCAGACTCTGGTGATATATAATCAGAATACGGAA…	-
RPL9A	S_Cerevisiae	0.942175	0.0152086	TGGGCAGAGAGTATTTGTCCTGCGTATAGAGGAGAAAAAATTGTACTGATGCTAATTTTGGTGTCGTTCTTCTTTTTTATTTTGTAAGACTGTTTTCCAGAAATGTTTGGGTTTATTTTTTAATTTTTTGAAACATTTTTTTCATCCTTTCTCATTTTGTCATTTCATTTTTCTGTGGAAAATTTCACTGACGCGAAGAAGCGATGAAATTTCCAACATCCTCCCATCATCCCAATATTGGCATACACACACATGCAGCACAGCGGAACTGCGGAGGTCAGAGGCAATGTGGCAGAGACGCTGGCGCGCCTGTATTGTATAATAGTATATTTTACACTCAATTCAATTTTTTGATATTAAATTAGTGTGTAAAAAGCTTCTGAAATCAAGAAGCCCGTA…	TGGGCAGAGAGTATTTGTCCTGCGTATAGAGGAGAAAAAATTGTACTGATGCTAATTTTGGTGTCGTTCTTCTTTTTTATTTTGTAAGACTGTTTTCCAGAAATGTTTGGGTTTATTTTTTAATTTTTTGAAACATTTTTTTCATCCTTTCTCATTTTGTCATTTCATTTTTCTGTGGAAAATTTCACTGACGCGAAGAAGCGATGAAATTTCCAACATCCTCCCATCATCCCAATATTGGCATACACACACATGCAGCACAGCGGAACTGCGGAGGTCAGAGGCAATGTGGCAGAGACGCTGGCGCGCCTGTATTGTATAATAGTATATTTTACACTCAATTCAATTTTTTGATATTAAATTAGTGTGTAAAAAGCTTCTGAAATCAAGAAGCCCGTA…
RPL9A	S_Paradoxus	1.2236	0.0150653	TACAAGGAGCATTATGTCTTGCGAAAGAGAACAAGAGGAGATATTGTTGTTCTAACTTCAATGTTCTTCTTTTTTTTTTGTAAGACTGCTTTTCAGAAGTGTTTGGGTTTATCATTAAATTTTTGAAGAATCCTTTCCATCTTTTCTCATTTCGGATTCTATTTTTCTTTGGAAAATTTCACCGACGCGAAGAAGCGATGAAATTTCCATTATCCTCCCGTAATCGCAATATTGGATTGCACACACATGCAGCACAGCGGAACTGCGGAGGTCAGAGGCAATGTGACAGAGGCGCCAACGCGCCCTGTATTGTATAGTAGTAGATTTTACGTTCTATTTAATTTTCTTGATGGTAAATTAGCGTTAATATAGTTCTCAAAGTCAAGGAAACCGTACCAG…	TACAAGGAGCATTATGTCTTGCGAAAGAGAACAAGAGGAGATATTGTTGTTCTAACTTCAATGTTCTTCTTTTTTTTTTGTAAGACTGCTTTTCAGAAGTGTTTGGGTTTATCATTAAATTTTTGAAGAATCCTTTCCATCTTTTCTCATTTCGGATTCTGTTTTTCTTTGGAAAATTTCACCGACGCGAAGAAGCGATGAAATTTCCATTATCCTCCCGTAATCGCAATATTGGATTGCACACACATGCAGCACAGCGGAACTGCGGAGGTCAGAGGCAATGTGACAGAGGCGCCAACGCGCCCTGTATTGTATAGTAGTAGATTTTACGTTCTATTTAATTTTCTTGATGGTAAATTAGCGTTAATATAGTTCTCAAAGTCAAGGAAACCGTACCAG…
RPL9A	S_Mikatae	1.2036	0.017824	CGTATACATATATCTATCATCTAAGAAGAGAACAAGTGAAAGTACCAGCGCTAATTCCGTTATTGTTATCTTTTTCTTTTTTGTAAGACTGTTTTCCAAAAATGTTTGGGTTCGCTTCTAAATTTTCTGGACGTGCTCACCTTTTCTCTTTTGACATTTTACTTTTTCTGTAAAATTTCACCGACGCGAAGAAGTGATGAAATTTCCAATATCCTGCCGTCATCCCAATATTGGATGGCACACACATGCAGCAGAGTGGAACTGCAGAGGTTAGAGGCAATGTAACAGAGGCACCAGTGCAAACAGAATTGTCTAGTACTTTATTATATTTAATATCTAGAGGAACTTCTTGATTGTATTAAGTTCCTAAGCCCAAGAGAACCGTACCAGGAGTCAATC	CGTATACATATATCTATCATCTAAGAAGAGAACAAGTGAAAGTACCAGCGCTAATTCCGTTATTGTTATCTTTTTCTTTTTTGTAAGACTGTTTTCCAAAAATGTTTGGGTTCGCTTCTAAATTTTCTGGACGTGCTCACCTTTTCTCTTTTGACATTTTACTTTTTCTGTAAAATTTCACCGACGCGAAGAAGCGATGAAATTTCCAATATCCTGCCGTCATCCCAATATTGGATGGCACACACATGCAGCAGAGTGGAACTGCAGAGGTTAGAGGCAATGTAACAGAGGCACCAGTGCAAACAGAATTGTCTAGTACTTTCTTATATTTAATATCTAGAGGAACTTCTTGATTGTATTAAGTTCCTAAGCCCAAGAGAACCGTACCAGGAGTCAATC
RPL9A	S_Bayanus	0.904863	0.0114154	TGTACAAGGAACTCGTGTCATGCCAATTTACTGTATATATCGTTGGTGTGCATTGTCACTTGAAAAAGAAAGTGACACTGTTTTTCCAGGACAGTTTTTCAGAAATGTGTGGGTGTAATATTACACGGTAGTTAAAATTTTTGAGAATTGTTTTCTGGCTTTTTCCTGGCAGCTAGTTTTTTTTTTTTTGGAGAATTTCACCGACGCGAAGCAGCTGTGAAATTTTCAAGATGCCGCCATCATCGCAATGTGGGATTGCATGCGGAGGAGCAGGTAGTGCACATGCCAGAGGCAGTGCGACACAGGCGCCTATAGTGTATAGTAGTAAAGACTTAGTTTTTATTTGATGAAACGATATTGTGTATATATTCTGTTTGAAGGAGAAAGGAACCATACCAG…	TGTACAAGGAACTCGTGTCATGCCAATTTACTGTATATATCGTTGGTGTGCATTGTCACTTGAAAAAGAAAGTGACACTGTTTTTCCAGGACAGTTTTTCAGAAATGTGTGGGTGTAATATTACACGGTAGTTAAAATTTTTGAGAATTGTTTTCTGGCTTTTTCCTGGCAGCTAGTTTTTTTTTTTTTGGAGAATTTCACCGACGCGAAGCAGCTGTGAAATTTTCAAGATGCCGCCATCATCGCAATGTGGGATTGCATGCGGAGGAGCAGGTAGTGCACATGCCAGAGGCAGTGCGACACAGGCGCCTATAGTGTATAGTAGTAAAGACTTAGTTTTTATTTGATGAAACGATATTGTGTATATATTCTGTTTGAAGGAGAAAGGAACCATACCAG…
RPL9B	S_Bayanus	3.56424	0.0245999	ACGACTATGGACGCAGTCAGAAGCAAGAAGAAACCACCAAGCTTTACATTACAATTCAGAGAGGGATAAGCATGGTGTGCAATCGGGAGCACCGTGTGCGCCCGTTGACGCAACCTTGCAGAGGCAGTTGCGAGACAAGTTTGACATAATTTTTTAGACTTGTCATTTAAGTGCTACTTTTGCAGTTGGCCCTTCCAAAGTTATGTATGTCTGTATGTATATATGATTTTACAAACTCAACGGGTCTTATTCTCTCCTAGTATTCATTTCCGGAGCCGTTTGTAGGATCCCCTGTTTAGCTCTTTAAGTTTTTACTTTTTTTTTTCTTTATGTTTTGCCCTTAATGCATTGTTTCCTTTTTTTTAAAAGTCCGAAGTAAAGAAGTAAAGAAAAGACGAC…	-
RPP0	S_Cerevisiae	2.57595	0.047372	TTCAACAATTCGTTATATATATGGTAGGCTTCTTCAACAAACGGTTGTGCGCTTTTTAGTCGTATGCTTTGTCTCATATCAAAAACTTTCTTCATAAGTTTATAATTTTAGATTTTGTTCAAGTATTTACTGACTGTGCGGATTATTCTTAAGGCCCCTATTTGAGGACGGCGGCCGCACCCGTAAGCAGTGACTAGGTTATGAACATTTCATTCTTTCTAAAGACGCTTTTAGCAAGCTTCATACAGGATAGTAGGATTTGAAGGCTAACATTGTGATTCCATCCTCTGTCAATGTTTCGTAACTTGAATATTTGCGACTTTTTCCATCTTTTGTGAGCTAAAATTTTTATCTTGCCCTTGTAATTTGAACTTAAAAGAGAATACAGCAATGTAGCGG…	TTCAACAATTCGTTATATATATGGTAGGCTTCTTCAACAAACGGTTGTGCGCTTTTTAGTCGTATGCTTTGTCTCATATCAAAAACTTTCTTCATAAGTTTATAATTTTAGATTTTGTTCAAGTATTTACTGACTGTGCGGATTATTCTTAAGGCCCCTATTTGAGGACGGCGGCCGCACCCGTAAGCAGTGACTAGGTTATGAACATTTCATTCTTTCTAAAGACGCTTTTAGCAAGCTTCATACAGGATAGTAGGATTTGAAGGCTAACATTGTGATTCCATCCTCTGTCAATGTTTCGTAACTTGAATATTTGCGACTTTTTCCATCTTTTGTGAGCTAAAATTTTTATCTTGCCCTTGTAATTTGAACTTAAAAGAGAATACAGCAATGTAGCGG…
RPP0	S_Paradoxus	2.49852	0.0176292	TTCGATAATTGGTTGTAAATAAGATACGCTTATTCAGCAAAACGTTGTGCGGTTATTAGTCGTATACTCTGTTTCATATCGAAGACTTTCTTTATAAAGCCAGATTTTGTTCAAGTACTTACAGACTGTGCGGATTATTCTTAAGGCCCCTATTTGACGGTGGCCGCACCCGTAATAAGTGACCAGGTAAATAACATTTCTTCCATTTTAAAGACGCCTTAGCAAACCTTATTCAGGAAAGTAGGAATTGAAGGTTGAACTCATCAGTTCTCTGTAAATATTTTACGACTTGGATATTTGCGACTCGTTCGGTCGTTTGTGAGCTGTGAATTTTGTATTGTCTTTGTAATCGAAATGTAGAGGAGAATACGGCAATGAAGTAAGAAAACTGACTATTAA…	-
RPP0	S_Mikatae	2.3755	0.0221009	TTCTAAAACTTTCTGTAAATAAGATGCGTCTATTCAGGAAAAAAATACGCTGTATCTGGTCCTATTTCCTATCTCATTTCAAAGATTTTCTTAATAATTCCATGATTTTGTTAACTCTTTATTGACCATGCGAATTATTGTTAAGGCCCCTATTTGGCGGTGATCGTGCCCGTAAGCGGTGATCAGATAAATCACATCCGTCATTTCAAAGAAGCTCTTGGTAAACTGTATTCAAGAAAAATGAATATTCAAGATTAAAATTCCTGAAGTTTCTACAAATACTTTACTACGTAATCCTTTTCTAATAAGTTTGGTCGTTTGTCTTCTAGAAATTTTGTGTACTTTTTTTAACCAAATCCTGAATCAAAAGAGAATAAGTTGTGAAGTACATGAAATGAA…	-
RPP0	S_Bayanus	2.29321	0.0243849	TTCTATAGTACTTTGTAAATAAAGGGCACTTAATCGACAATACTATCGTACTCTCTTTGGTCGTATTTGTATTTCTTGTCATAGGATTTCTTTATTCATTTATGATTTTAGTTCTTTATTCTATATGCGATATTTTAAGGCCCCTATTTGGCGGTGGCCGTGCCCGTAAACGGTGATTAAATAAACCGTCGCCTCTGCCATATTAGGCTCTATTATGAATTGGTCCAAGAGGGTATGAAGTCAAGGGTGGATTTACGAATGGTATGTACAACGGTTCTACTGTGTGGTTATGCAAATTTTTTTTTGAATCACTTCACTTTGATATTACTATTCATCAAGCCGTAGCTGCTGTATAGGCTTGCTTGTACCCAAAACTTAATACGGAAGTGAGAGATGGGA…	-
RPP0	S_Kluyveri	1.15683	0.0056495	GAACAGAAGAAAAACGTGTCTAACTTGAAAATTGGATGTTATTCGTTATTAGAATGCCGCCTTGTTATTCTGGCTCGTTGAGGTATGGAACATTCCTTTAATCTAGGCAAGGCAAGGAAACATAGAAAGAAAAGAGAAGTAAAGAAATCACCAGGGAATCACCAAGGAAACTCATTAGGGAAACCCGCTAGGGAAACCCGCTAGGGCGCCCACGCCGACAGAAGTTATGTTAAACATAAAACATAATTCGGCACATATGGTACGCTTAGACAAAGGAGAATGCCGCTTTATAGGTGCTTACTCTATTTAATATGACGTATGTAAAAAATGGACAGTCAATGTTATGCTAGAGAGGAAGGCGGGCTGCCATTCTTTTCCAGTATTGTCGAACACAATTAA…	-
RPP0	D_Hansenii	0.133568	0.0110572	TTGTCTATATAGTTAGAAGAGTAGACTATTATAAATTATAAACTATGAGCTATCATATATCGTATATACGTATTCACGTGTATATAGTTAGGTTTAGGGTTTGAATTGAAAATTCATAAAAATGACACAAAACCATAGCTGAAAAATTTTGAGTACCCACTAGGTAGGTTGAAATTTCACAGCGGACATAATTATAGAGTTTTTCCTTTTATTAACTTATCAGATATTGGGTCCATTAAATATTCCTATCGTCAATAAATAAGTAAATAAGTCGAA	-
RPP0	Y_Lipolytica	0.0484227	0.00706468	GAACTCACGAAGCGAAGACGCACTGACGACTAAGCATCATTGAATATGATACCGTTATATAATAGTGATGTATGTTGTGCTGGCCACATCCTACATTCAGTTATGTGTACTCCGCGCTGACAACGTGGACTCACTGGGATACTGTGCGGGACTCTCGCCTTATGTGACTACTCTATACATACATACTGTACGGGGAGTGAGTGTCCCAGATCGTACATATATACAAGTACATACTACATAGTAGTTTGATGATGCTTAATGTGTGCAAATAGTGAAGAAACTTGAGACAAGCTCTCTAATCAACCGCTCACTACGTTAACTACGTTTATTTACGTGCTTTTTCATATCTTCGAAGTTTTGTATGTCTTAAAAAACGAAACTTCAGCTTGTTTGAAGCTG…	-
RPP0	S_Pombe	0.00865003	0.0102555	TGTCAATCATTTTCGTAGTATTTTACTTAAAACACATCTGTTGAATTTGTGAATTCACTAATCACTATCGCATGGAGGCTGAATTTTTCCTTTGACTCGAATGGTAAACGCTTCAGCAATATTTGAGATTTGTTCGTTTTATATTGAAGGATAAAAGTACTGCTCGATGCCACGAATTTTACGGTCTCATTTCAATAGCTGTATATGGTACGTTGCACTCAAGATTAGTCCCACATGCACTTTTGTGATGAGAGTAGTAAGTCTAAAAACTAAACATACACATTTCTCTTCTTCTTTTCTCTCCAACTGACTTTTGTGAATTGCATTATTTTATTCTTATATTAACTGCATTTGTATCTACGTTTACAACGATATTGTTTTACCGTTATACCATATATC…	-
RPP1_v1kl	S_Kluyveri	0.883544	0.0210485	TGTGCAAAAAACGATCATCTGCTTACATACTTAAATAAAACACGTACCCGTATATTTCGTTATCCCGTCAGACAATGCTATGAATTTTATGAAGGCAACGTTACCAATGGACCATAAGAATTGAAGCTCCGATTCGTTGGAATATAATATATATTCTATTAGTACCAACGCTTTTCATTCGATACAGCCACTGCCATTATTCCCACTTTTATGGATTCTGTCAGTTTATCCTTTGATTTACAACACTATCATTTTGGCCTGCGCTTGAAAGTCACTATTACCCTCCCCAAATGGTGTGTTACCCTTCTTTGATACACCCATCTTTTTTTTTTTTTCCCCTAGCCGCGATGACCACGCAAAGCTGCTTCTGAAAAAAATTTTCTTTCACATCGTCGAGCT…	-
RPP1_v2kl	S_Kluyveri	0.873859	0.0277818	ATAAATATATTTGGAATAGCCCACTTTTGCATGTCATGAATCTCTTAGACCGTTTATGCGTTCACGAAAATTTTTTTTCTTTATTCTATTAAATACATCTATTAAATATTCCCTTCTAAAACGTTTTACGTGTTGTAATTGTAGCTGAGGGGTCATCATAAATATTTTTGATGGCGTGGAATAGCAGACGCAACATGTTACTGATTTCGATTCCAGGTAATAATACTCGTGGACTTGTCCTTCGATAATGACGGGAGTATGCTGCGCTTGCTATTTTACATGTTACTTAATTTTACATGCATTTGCATTCTTCTCTGTTGTCTTGTCCGGAAAGCTTTTGAGCTAGTTTCAATATCCACAGTAGCTGCAAAAACATAAAACCCTAGCATAGGACATAGA…	-
RPP1A	S_Cerevisiae	1.24582	0.016935	CCGCCCTACTACCAGGGACCCTCATGATTACCGCTCGAATGCGACGTTTCCTGCCTCATAAAACTGGCTTGAAAATATTTATTCGCTGAACAGTAGCCTAGCTTATAAAAATTTCATTTAATTAATGTAATATGAAAACTCACATGCCTTCTGTTTCTAAAATTGTCACAGCAAGAAATAACATTACCATACGTGATCTTATTAAACTCTAGTATCTTGTCTAATACTTCATTTAAAAGAAGCCTTAACCCTGTAGCCTCATCTATGTCTGCTACATATCGTGAGGTACGAATATCGTAAGATGATACCACGCAACTTTGTAATGATTTTTTTTTTTTCATTTTTTAAAGAATGCCTTTACATGGTATTTGAAAAAAATATCTTTATAAAGTTTGCGAT…	CCGCCCTACTACCAGGGACCCTCATGATTACCGCTCGAATGCGACGTTTCCTGCCTCATAAAACTGGCTTGAAAATATTTATTCGCTGAACAGTAGCCTAGCTTATAAAAATTTCATTTAATTAATGTAATATGAAAACTCACATGCCTTCTGTTTCTAAAATTGTCACAGCAAGAAATAACATTACCATACGTGATCTTATTAAACTCTAGTATCTTGTCTAATACTTCATTTAAAAGAAGCCTTAACCCTGTAGCCTCATCTATGTCTGCTACATATCGTGAGGTACGAATATCGTAAGATGATACCACGCAACTTTGTAATGATTTTTTTTTTTTTCATTTTTTAAAGAATGCCTTTACATGGTATTTGAAAAAAATATCTTTATAAAGTTTGCGA…
RPP1A	S_Paradoxus	1.40418	0.0310779	CCGCCCTATTATCAGGGTCCTCCATGATTCTCGCTTCAGTGCGCTACCGGGAGACAGAGTTACGTTTTCTGCCTCATAAAACTGACTTAAATATTTATTCGCTAAATAGCAGCCTAGCTTATAAGAATGTCATTTAATTAATGTACTATGAAAACTTATATGTTTCCTGTTTCTGAAAGTTGCCATTGCAAGAGGTAGAATCGCCGCACGTGATCTCATTAAGCTCAAATATCTTGCCTAATCCTTCCATTCGAAGAAGCCTAAACCCTGTCATCCCATCCGCGCTTTGGAATATCGTGATGTACGAGTTTCGTAAAAAGATACCACGCAACTTTGTAATGATTTTTTTTTTCATTTTTCAAAGAATGCCCTTACATGTATTTGAAAAAAATTATCTTT…	-
RPP1A	S_Mikatae	1.2928	0.0355764	CCACCTTATTATCAAGGTCCTCCATGACCGCTTCATTACGTAGTTGTCCCACCTATTCAAAGACACATTTCTTAACAGCTTCATAAGTATAACTCAATTATTTATTAGCCAAACAGCATCATAGTTTATAAAATTTGGTCTAACTGATATACTACAAAACTCTATATGTTTCTGATCTATAAAATTAATATCGCGAGGAATGAAGTCACAGCGCTGAATTTTCCTAAATCGAGATAACCAATGCTGATTACCTCATTGTGAAGACCCTTAAGACTCTATTCACTTGAGACCTGATCATAGAATATATCGTATTGAACGAAGTTCGTATAAAAATACCACGCAACTTTGTAATGAATTTTTTTTTTCTATATTTTTCATAGATTGCACTTTCGTGTGTTT…	-
RPP1A	S_Bayanus	1.4544	0.00753043	TCTCACATTAATGCACACTCTTCCTCTTTTAATTATTAGAGTTTCGTTTTTAGCAGCTTCATAACTATAATCTAAATATTTTTTACCCAAAAACAGCATAGTTGATAGAAAGTTTTATTCTATTGATATATTACATAACCTAACATGCATTCATTTGGGCAAGAGTGCTGTTGTTAATAGCCATATGAAGATACCTTGACCTGTAAGGCTTCTCAATCACTTTTCATACATATTAAGATCTTTTGCTCTACCGACCTCCATTCCTTCAAATACGTCATCATTTATAAACTAATTATGTTTTTACCAAAGAGGCAGTTAATACTGGACTTGAAAGGTTGGGTATTTATCTCAATCATGACACAATAACTGCTGCACAATTCAAATGCCTCAGATGGAGCC…	-
RPP1B	S_Cerevisiae	1.89442	0.034129	TGGTCATTGTTAAGGCTAAAGGTTCTGCAGACACGTTTTGTACGTAGAAAGAAGCAATCATGCCAAATCAAAATTAGGAAATGAACATCAGTGGTATTTTATAAGCCTGCACATTATATATAGTATATACGTCACGAATACAGGAACACCGTCAGTTAGAGAAACGTCGCCTCAGTTTGCTCCTCAGATATTCCTTTAAACCCATACATATCTTACACAAAACATCCGTACATCAGAAGGATTATATGAAACGCAAAAAAAAATAAAATTTTCATTTCTGCGTGTCGCGCGAAGGAGAAATCTTAGAATTGAAACTTCCGGCTAACGGTTGCTAAAACTAGTTTCCAATGTAATACCAAATAAGCATTTGATGTTGAATCTGTAAGCCCCTTCGTGATA…	TGGTCATTGTTAAGGCTAAAGGTTCTGCAGACACGTTTTGTACGTAGAAAGAAGCAATCATGCCAAATCAAAATTAGGAAATGAACATCAGTGGTATTTTATAAGCCTGCACATTATATATAGTATATACGTCACGAATACAGGAACACCGTCAGTTAGAGAAACGTCGCCTCAGTTTGCTCCTCAGATATTCCTTTAAACCCATACATATCTTACACAAAACATCCGTACATCAGAAGGATTATATGAAACGCAAAAAAAAATAAAATTTTCATTTCTGCGTGTCGCGCGAAGGAGAAATCTTAGAATTGAAACTTCCGGCTAACGGTTGCTAAAACTAGTTTCCAATGTAATACCAAATAAGCATTTGATGTTGAATCTGTAAGCCCCTTCGTGATA…
RPP1B	S_Paradoxus	1.25129	0.0411431	CGGTCTTTGTTGGGGGCTTAAGGTCCTGTAGACACAGTTTGTACGTAGAAAAAGCACTCATACCGAATCAAGAATTGGGAGATGAAAGTCAGTGGTATTGTATAGTACTTTTGACTTTGCACATTATATAAAGTATATATGTCACGAAGATAGGAACACCGTCAGTTAAAAGAACGTCGTCTCCATTTATTTTTTAAATGCTCCTGCAAGCCCATACATATTCCACGTAAAACATCCGTACACCAGACAATTTATTTAAAATGCAAATAGACATAAAGTCTTTTTTATTCTGCGTGCCGCCCGAAGGAGAAATCTTAGAGTTGAAACTTCCGGCTAACGGTTGCTAAAACCAGTTTCCAATGTAAAGCCAAATAAGCATTTGATATCGAAACCGTAGCC…	-
RPP1B	S_Mikatae	1.64881	0.029123	GGGTCAATATTGGAGCTAGTTGTGCCATAGATACGACCTACATTCAAAAAAAACCGGCAGCGACAAACAAAAGTCATGAGAAATGATTGTCAGTAATATTATATAACACTTTAACTCAGCACTTTATATGAAGTATACAACACGAATATAGGAATTATGTCAAAGAGAAGAACGCCGTTCCATTAACTTCGAAATGTCCCGTTAGACCCATACATATTACCTTCCAACATCCGTACATCTAATTAAATCTTTTAATCTTTAATGAACTTTTTTTTTTCGCGTGCAGCGCGAAGGAGAAATCTTAGGATTGAATCTTCTGACTGGCTGTTGGCTGTTGGTAAAACTAGTTTTCAATGTAAGGCCAAATAAGCATTTGAAATTATATTCACAAACCCCTTC…	-
RPP1B	S_Bayanus	1.30357	0.0240423	GGACCATTGTCGGAGTTAACCGATCCAGGAACACAATCTAGGAAACAAACACGCCCCGAAAACAAGAACGGTGAGAGATGAAAGTCATTGACGCTGTATAGAACTTTTAGATCTGCCCATTATATATATAAATATACATTTTTATGAACAAGTACCACGCCAGAGTAAAAAGAATAGAAATTTTTCCTTTTCCCCCAAAACGCTATTAAGAACCCATACATGTTTACTGCAGTACATCCGTACATATTTAGAGAGACCTCGTTATTTCAAACTGGTTTTTTCCACATTTGTGTTTTGCGTAGCGCGCGAAGTAGAGAATCTAGGAATTGAAACTTCTGGTTAGAGGTTGGTAAAACTAATTTCCAGATTAAGGCCAAATAAGCAATTAGTATTGATTAA…	-
RPP1B_v2la	K_Lactis	0.503896	0.0156027	CTGACACCACACGTAAAGTTTTTGGTAATATTGAAAATGAGATTAAAAACAAAACTATAATCATGTAATTCAATTTTAATATATTAACATTCATTATACTATAATTAGAAATCAATTTCACTCAGGATTACACAATGGAATGAACAGTCAGTCCTAACCTTTCGTAGGTTGCTTCACAGTGATCCAAGGGAAACACTGAATTGAAGGAAAGATATTATTTACAGTAACTTAGTAGAAGTTACCCTTTCGTGGGGAAGTGAGTTCAGTCCTATTGAGATATCTAAAATTAGTAATCCGATATAGTGTAACGGCTATCACACCACGCTCTCACCGTGGAGACCCGGGTTCGACTCCCGGTATCGGAGAAAAAATTATCCTTTTTTTATTATCACTTTTGCA…	-
RPP2_v1kl	S_Kluyveri	1.53313	0.028411	AGTTAATGTTCTCGTCCCTTATTTGGTGATTGTAAAAGAGTCTCCTGTAAACAAGTACTACTTCTTTAGATCCAGTGCCATAGTTGTCGTTTGATAATACAGGATGCACAAGCCAGACCCAGAGCGAAACCGACAGAGGGTTGGAGAGAGAGTGTGTGTGAGAGTGTGTGCGTGCACACGAGTCGCGCGCGCGCACCGTGTACCCGTTGGTGGATGGAGCCTAGCCTGGGCACAGAAGCGAGCCCAACGTTACTTTGTTGGAGGAGGGCCAGCCTAGAGGCCAGGCAGAAATATCGCCTTGCCCCTTCTGGGAGGCACAGCTGGGTTATTTTTCAGTCTGGTCAACCAAACACCCACACAACACGAGACTGCTTTTTAGACCCACACACTAACATACAA…	-
RPP2_v2kl	S_Kluyveri	1.06536	0.0122417	CTTATTCAATGCCTAGTGGTCAAGGAATTTCGATTTAAAGTAAAAGTAGTAGAACTAAGAAAGCAAGAGATAAGGAATAAAACTTCAAAAACGGTTTGTCAGACACTCATCGAAATAGCAGAGGTCCACAGAATCTGCATCTCGAGCAGATTAAAAGGCACGGGAATTTCAAAAAAAAAAAAAAAAAAAAAAGAAAATGAAAAAATGAAAAAGGCATAATTACGTTATTAGTGATATATGGTATACCCGTTCTAGTTTTTTCGCATGTTAATGCGTAATTCACAGACCGCACACTCTGTACGAGCCACGCATTGATTTTTTTTTCCTTCCAGAAGCGATGAGTTTGAAAAAAATTTTCACTTTGTCGAATTCTCTCTCACACTCTTACTCTTCCTCTTC…	-
RPP2A	S_Cerevisiae	1.5832	0.025418	TGATCGGTCGTGATTATCTTGTTGTGTACTTCTAGTTCGTCTTATTCTACAATGTAAGGATAAGCACTAACAAATAAGAAAAAAATGAAATCCAAGAACAAATAAAAGAAGAGACCATACCATAATGTGAAACTCTGCACAAAAGATTAAAAAGGAATAAATTGATTGCGGATAGGAAGGGCCAAGCAGACGATTACGGTGTTGTCTCGCAGCTTCCCAGCAAGGAGTTTCTCAGAGAACCTACTCCGAGTGAAACGGACGGAAGAGACCTTCCAAAGAGAAACGAAAATCGGTTCTAGGAGGACGCTCCCTCTAAGTGTCTAGGCCCGTGTTGGGCGGAACTGCCGCCCAACACGGTTTCCGGGACTATACGCCCAGACATAACATTGATTTATACGC…	TGATCGGTCGTGATTATCTTGTTGTGTACTTCTAGTTCGTCTTATTCTACAATGTAAGGATAAGCACTAACAAATAAGAAAAAAATGAAATCCAAGAACAAATAAAAGAAGAGACCATACCATAATGTGAAACTCTGCACAAAAGATTAAAAAGGAATAAATTGATTGTGGATAGGAAGGGCCAAGCAGACGATTACGGTGTTGTCTCGCAGCTTCCCAGCAAGGAGTTTCTCAGAGAACCTACTCCGAGTGAAACGGACGGAAGAGACCTTCCAAAGAGAAACGAAAATCGGTTCTAGGAGGACGCTCCCTCTAAGTGTCTAGGCCCGTGTTGGGCGGAACTGCCGCCCAACACGGTTTCCGGGACTATACGCCCAGACATAACATTGATTTATACGC…
RPP2A_v1la	K_Lactis	0.851765	0.0162476	TGCTTTCTTATTGTATGGTTCGGTGAGTTAAGCTAAACAACAAAAAGGAAAAGGAAAATTAAACCAAGCTCTATTGAAACCTTCTATTATAAAAAGAATACGTGAAATGAATTGCAATATCAACTAAAATCTCTATGTGAAATCAACAAAAGCTGTAACTATCAAAAAAAGCATTAAATTCAAACTGAGATTGTTCGTATTGGTGAAAAAGGTCGATATCCTCAAACTTCGCAATGATTCTGAAAAGTTCACCAAAAAAATCATTCAATGGTAGGACCCATACTAGGGAACCAAGCTGTTCGCAGAGACAATAGCGGAGGAGAAGATGGGCCCTATTCCCAGCTGGAAGCATGGGTTGGACGGGGGAGACGGTAAGGTTAGGCAGGAAGCTTTGCTACC…	-
RPP2B_v2la	K_Lactis	0.438928	0.0193221	TAAATGATAAATGAGGAGGTATGCCCTTGATGTTATAGATCTACCCGTCGATATGATGTACTTACCGTCCTGAAGATTTCACATTCGCTAATCAATATCTATATATCGTTCACTATTGAAGACTCATCTTTAATCTCATAGTATTGAATTTTTTTTTTTATTTCTTTTCACTGTGTTATTGGATAGATAATGATATTTCAGTATTGAAGATTGGTTCCAGTAGTTCACCAGACGACCCAAACAAAAAGTGACAAGCCTTTAGATAACAACTTTCTTCTAAGCTCGAATAATTGTCATTTATCAGAACACATCTGTACATATTTGATACATACACTATATGCCTACTTGTGTTTATATTATGTGCTCCTTTTCACGTATGCATCAAGTACGTATGAAATA…	-
RPS0	S_Kluyveri	1.27644	0.0453125	TTGAAGGGCGCCTATAACTGTAGCTCAAACTTTAGCAACAGATTTGATGAGTTTAATGAGTAATGTCACCACTACACACTTAAGTCTCCAAACACTTTGTAAGCTTTCTAACAGTATTCACGGCTGGGTGAATGCAGCGGAAGCAGGTGGAACAGAATGAGTACGTATAATTTTCTATATGTACACCCACGAATTGCTATACGGGCGGCTATAACCTTCTTGATTCAGCATCTGTGGATTCTTGGGGGTGCAAATCGTTGCGAAAAGGCCGCCATTAAGGATTCTCTAAGCAAACCACGGTGGTTACCAGCCCTGACACACAGAATCGTACAGCCCTGATGTTAGTCACGTGTAACAATGTATTTGCGACTGCTTTTGCACCCAAGCATATTTAAAGAG…	-
RPS0	K_Lactis	0.870592	0.0181218	AATAAGGCTGTGATTTTCCAGTATTTTCAAATGCATTTGTTATAAAGATTATTATATATGGCGAAGGTGAAGATTCGGAAGGTCAAAATCTTATTTAAGCTTACCAAATATGCACACACACACTGATTCAAGGCACGAGGGGTGCAGCACCAACGTGGTTACGAACGTGTGATTAGCGTGGTGGCAATAAGATAATATATTATGGGTGTATTTGAATCATGGAAGGACACTGCGTAAAGGTATCGCATGCGATGCCTTTTTGCAATGTCTGTTTTACGTAATATTTCGATACACTTTAGTATCAGATTTCAGGGTGTGATAGTGCCCTAAAACGGCAAGCAACTGACAGCAGCCACTAATCAGATTTTTATCGGATCAACGAACCAAGCATTCGGGCTG…	-
RPS0A	S_Cerevisiae	1.26298	0.0411117	CGAAGTGGTGAAAAGTGCTGACTGTCTATTACATACTTTTACAGGGTTTATTATTATAGAATGAAACAGGCAAGGTATCTTATCCCTTTATTATGAAAACTATATATACGCATAAGTCTTTTGCTGCATGATAAGCCCCTTCCCAAGAATATGACAACCTCTTATTGTTCTTTTCACCAAAGATCCACGGAACTCATCTTTAGCAAGTGAGGCTTGAAATATCACAGATATCATTGTGAATACCGCATTGAGCAGATTGTTGACAGCGGGCATCTTACTAACAGGCGCAATCTAAAGAAGCCGCGAAAAAAAAAAGAACACGCTAAACGATTCACCCATGCCAGCCAAGTGTAGATTTGTTTGTAGAGGAAAACAGTTGATGAGCAATTTACAGTGTTT…	CGAAGTGGTGAAAAGTGCTGACTGTCTATTACATACTTTTACAGGGTTTATTATTATAGAATGAAACAGGCAAGGTATCTTATCCCTTTATTATGAAAACTATATATACGCATAAGTCTTTTGCTGCATGATAAGCCCCTTCCCAAGAATATGACAACCTCTTATTGTTCTTTTCACCAAAGATCCACGGAACTCATCTTTAGCAAGTGAGGCTTGAAATATCACAGATATCATTGTGAATACCGCATTGAGCAGATTGTTGACAGCGGGCATCTTACTAACAGGCGCAATCTAAAGAAGCCGCGAAAAAAAAAAGAACACGCTAAACGATTCACCCATGCCAGCCAAGTGTAGATTTGTTTGTAGAGGAAAACAGTTGATGAGCAATTTACAGTGTTT…
RPS0A	S_Paradoxus	1.12828	0.0214045	CGGTGATAGAAAATGTACTGAATGTATGCTACATTCTTCTACAGAATTGATTACTTCAACATATGCAGGGTACATTTATCTCATCTAATTGTGAAGAGTATATATACGTACAAATCTTTTGCTGCATGATAAGCCTTTTCTCAAGAATATGACAATGTTTTATTGTTTTTTCCCGTCAAAGATCCACGGAACTTATTTTTGGTAAGTGAGGCTTGAAATATCACAAATGCCAGTGTGAATGCCGCATAGAGCAGATTGTTGACAACGGGTATCTTGCTAACAAGCGAAGTGTAAATAGAAGCCGCGAAAAAAAAAAAACAGCATGCTAAACGATCCACCTATGTTAGCTAAGCGTAGCTTTGTTTGTATGGAAGAAACAGTTGATGAGCAGTTTTACAA…	CGGTGATAGAAAATGTACTGAATGTATGCTACATTCTTCTACAGAATTGATTACTTCAACATATGCAGGGTACATTTATCTCATCTAATTGTGAAGAGTATATATACGTACAAATCTTTTGCTGCATGATAAGCCTTTTCTCAAGAATATGACAATGTTTTATTGTTTTTTCCCGTCAAAGATCCACGGAACTTATTTTTGGTAAGTGAGGCTTGAAATATCACAAATGCCAGTGTGAATGCCGCATAGAGCAGATTGTTGACAACGGGTATCTTGCTAACAAGCGAAGTGTAAATAGAAGCCGCGAAAAAAAAAAAAAAAACAGCATGCTAAACGATCCACCTATGTTAGCTAAGCGTAGCTTTGTTTGTATGGAAGAAACAGTTGATGAGCAGTTTT…
RPS0A	S_Mikatae	1.20373	0.0247432	TGTAGTGGCTAAAAAAGTACAGAATGTTTACTGCGATCCTCTACAGGATTGGCCATTTTAACATTAGCAAGATTGTTCATCCATCTATATGTCAAAAGTATTTATATACATACAAGTATGCCACCGCATGATAATATTTTCCCGAAAAAGGTCAACGGTTTTTGTTTCTCCTACCAACATTTCATGGATCTAATCGTTGATAAGCGAGGCTTGTAATATCGCAGATGCCAGCTTTAGTGGTGCACAAAGCAAATAACTGGCAACTGGCATCTTGCTAACGCGCCAAATGTAAAGAAATCACGCAATAAAACAACAGGCTAAACACAATCTATTCATGGTAGCTTTGCGCCAATTTGCCTGTTTGAAGAAAACAGTTAATGTGTGGTTCTTTAACATCTT…	TGTAGTGGCTAAAAAAGTACAGAATGTTTACTGCGATCCTCTACAGGATTGGCCATTTTAACATTAGCAAGATTGTTCATCCATCTATATGTCAAAAGTATTTATATACATACAAGTATGCCACCGCATGATAATATTTTCCCGAAAAAGGTCAACGGTTTTTGTTTCTCCTACCAACATTTCATGGATCTAATCGTTGATAAGCGAGGCTTGTAATATCGCAGATGCCAGCTTTAGTGCTGCACAAAGCAAATAACTGGCAACTGGCATCTTGCTAACGCGCCAAATGTAAAGAAATCACGCAATAAAACAACAGGCTAAACACAATCTATTCATGGTAGCTTTGCGCCAATTTGCCTGTTTGAAGAAAACAGTTAATGTGTGGTTCTTTAACATCTT…
RPS0A	S_Bayanus	1.32807	0.0360981	AAAAATCGGCATATAGATGAGTTTCTATCTATATATCTGCAAGAGTATATATACCTGCACGCATGTACGCTACAATTATCCGAATCATGCACAAAAATCTATTTTTGAAGGCTTATGTGCGTATATGCCATTATTCGTTGGGTTCCGTCACATTATTTCCACGGAAGTCACAACTGGCAAGTGAGGCTTGTAAAAATATAGGTCGGAGTGAGTGCCGCACGGACCCGTCTGTTGACAAGGAAAAACCTCCCAGAGAAGAGAGGAGAGGAATCTCACTTGACGCGACATGTAGAGAGAGGAGACCGGAAAAACAACATGCTAAACGATCTAATTACAATGGAGAAAGACCAATGTTAACCTTCGACCCATATAGATGCGTTCCCTATAAAACAGCAGGCT…	AAAAATCGGCATATAGATGAGTTTCTATCTATATATCTGCAAGAGTATATATACCTGCACGCATGTACGCTACAATTATCCGAATCATGCACAAAAATCTATTTTTGAAGGCTTATGTGCGTATATGCCATTATTCGTTGGGTTCCGTCACATTATTTCCACGGAAGTCACAACTGGCAAGTGAGGCTTGTAAAAATATAGGTCGGAGTGAGTGCCGCACGGACCCGTCTGTTGACAAGGAAAAACCTCCCAGAGAAGAGAGGAGAGGAATCTCACTTGACGCGACATGTAGAGAGAGGAGACCGGAAAAACAACATGCTAAACGATCTAATTACAATGGAGAAAGACCAATGTTAACCTTCGACCCATATAGATGCGTTCCCTATAAAACAGCAGGCT…
RPS0B	S_Cerevisiae	1.13481	0.017079	AAAATACAGTAAACTTTTTTAGCGGAACTTCTATTGTAATTTAACGATTTAATCTGAAGAGATGTAGATGTAATAAAACTGTTAAAGTGGCAACGTGATAATTAAAAGCTTGGCAAAAATAAGAGATCAACACTAGCTTTTTCTTTTTCCACCTAAATTTGAAGGGAAATAAAAAAGAAATTGAGGCTGTACAGAGTGTTAATCTTCCATAACGGATACCACCAAACGTTTTTACCCTAAACTTAAATTTTATTACTTATTTTACATGCATAATGGCTGCCATGCGTAGTTCATACATGTTATTTGCACCCTTTTTCTTTTTCAATAACAAAAAAGAGCTTGGGCATTACGTTTTCAACACTTTTAATATTTCCCTTTTTACATCCGTACATATAAAAT…	AAAATACAGTAAACTTTTTTAGCGGAACTTCTATTGTAATTTAACGATTTAATCTGAAGAGATGTAGATGTAATAAAACTGTTAAAGTGGCAACGTGATAATTAAAAGCTTGGCAAAAATAAGAGATCAACACTAGCTTTTTCTTTTTCCACCTAAATTTGAAGGGAAATAAAAAAGAAATTGAGGCTGTACAGAGTGTTAATCTTCCATAACGGATACCACCAAACGTTTTTACCCTAAACTTAAATTTTATTACTTATTTTACATGCATAATGGCTGCCATGCGTAGTTCATACATGTTATTTGCACCCTTTTTCTTTTTCAATAACAAAAAAGAGCTTGGGCATTACGTTTTCAACACTTTTAATATTTCCCTTTTTACATCCGTACATATAAAAT…
RPS0B	S_Paradoxus	1.19227	0.0213597	AAAGTGCAGTGAACTTTTTTAACGGAGTTATTAATCAATTTAATGATTTGATTTAAAGAAGATACAAGTGCAGTAAAAGTATTATGATGGTAATATAGAAATTAAAAGCTTGGCAAAAATGAAAATAAAAAACTAGCTTTTTCCTCCACCTAAATTTGAAGGGAAATGAAAATGAAATTGAGGCTGTACAAGGTGTTAATCTTCCATAACGGATAACACCACACGTTCTTTCCCTAAAGTTAAATTTTTATTACCTATTTTACATACATACTAGCCACTATTTGCATAGTTGATAAGTGTTGTTTGCACCCTTTTTTCTTTTTCAATAGCAGAAAGGGCTTTAGCATTGCTTCTCGACATTCCTATGATTCCATTTGTTTACATCCGTACATACAAAAA…	-
RPS0B	S_Mikatae	1.24567	0.0482772	AAAGTGCAGTAAACTTTTTAATAGAATATTTATCCTACCTGGTGGTTTAATCCAAAAATGACAAAAAATGACGAAAATGCAATAAAAGTAATGTAACGGTAATATAGTAGAAGTTTAAAAAGCTTGGCTAAAATAAGAAACAGTACACCTGCTTTTCTCTCTACCTGACTTTGAAAGGAAATGAAAATGAAATCGAGACTGTACACGGTGCTAATCTTCCATGACGGATTACACCACACGTTCCTTTCCTAAAGTTAAACTTTTCGCTTGTTCTACATGACTATTAACTACTATTTGTATACTTTAAACTTGATGTTTGCACCCTTTTTCCTTTTTCAATGGCAGAAAGGGCTTTTAGTATTCTCTTACCTTTCCTACGTCCTCTTTATTCTGCATCCG…	-
RPS0B	S_Bayanus	1.2324	0.0385545	AGAACACAGTAAACTTTTTTCAATAGAACTTTTTATTATCCTATTTTTAATGGCCAGATATGAAAAGAATGACAAAAATGCAGTGGTATAGTATGATGGTAATACCGAAATTTAAAGCTTGGCAAAATAAAAACAATGGCACCAGCTTTTTTTTTCTACCTAAATTCAAACGCAAATGAAAACGGTACACAAATAATGGAGGCTTCACGGAGTGCTAATCTCCCATGACAGATAATATCACACGTTCCTTCCTTAAACTTAAAATTTTATCGCTTTTTTTTGCATGTCCATCAACTATTACTTGTACAGTATATTCCTGTTGTTTGCACCCTTTTCTCTTTTCAGTATGATGAAAAGCTAGATTTGTGTTCCTACACCCCTGTTCGTTTGCATCCGTAC…	-
RPS1	S_Kluyveri	1.525	0.0251686	TGCGAGCCTGGTTCCGTATGCTTGTAATGTCGGTTATTGATGTTCGACCTTATTGTTGATTCTGGAAAGATTTGTTTTACATATTTACCCTTTTCGTTCCTGTTTTCATTAGGGCTCATATATCATACATAACCACGTGATAGAGGGCTATAAAAATATATTCCGTATGACTTCTTTGTACTATCAAACCCATACATTAAACCAACAAAGACTAAACCCAAACACAGTGGGTAATTTTTCAGCGCATGTCGTTTTGAACGTGATCCCGCCTTTGCACAACATGGTCAGTAGACCCACCCACCTTTTGTGCGAGTTGGTGCAGCACACGGCCCGTCGCTCCCTGGGCCTGGAGGGCTCTGCCTAGCGTTCTCTCCAATCCGCCTAGCACTCACAGCATCT…	-
RPS1	K_Lactis	1.10516	0.0276429	TGCAACGAAAAAAAAAAGAGTGTTATCTGTAGACTTGTCTCACTGCTCTGTGTGTGTATATATCTGTAGCACACAGGATGTTTTAAAAGATACAATTGAACTTGGATATCAGCACGTATTTGTATGTTTCTATGTGTCGTTATGGAGCATACCGATATGTGTGTAGATTCTCATTATTTACCTTTAAATCATGGTAGCATGAGAAATGGAAAATGACAACATTGGGACTGTTGTTCGCGGTCACGTGTTGCTTTGACATCCGGACACCATTGTATTCATAAGTTTTACATCCATACATACTGTGTGTATCTTCAAATTTCATAACAGTAAGATATTTTGCTAAATAGGAACTTTGTTTACTGCTGTCATGTGACCGGGTGAGCCTAACACGAAAAATTA…	-
RPS1A	S_Cerevisiae	1.48293	0.019808	CCACCAACATTCATTTTCACTTCCGCCATAGATATGCCTATGTACACATGCAGTCTCTTCTGTATTCCTTAATAATGTAACCATAACTGTTTACTTACTAAAACCTAATCAAACTTCAGGACAGTTTTCTGTTGTGGACCCAGACCCACGGAAACGTTGAAACCCAAACATTAATATATTTTATTTTTTTTTTTTTTTCGGTTAATGAAAAACTAACTTTTTATTGTGCACTACGGATGCCTCGCGTCACCATCCGCTGGAAATTCCAGGACTCTCTCACCTGCGCGATAATATACCCAAAATGACTAGATGTCACAACTATTCTATTAAGAAAGGAAGGTGTTCACGTTGTGAACTTTAATATTAAGGAAACAAAACAAGCACACGAATAACCAATCG…	CCACCAACATTCATTTTCACTTCCGCCATAGATATGCCTATGTACACATGCAGTCTCTTCTGTATTCCTTAATAATGTAACCATAACTGTTTACTTACTAAAACCTAATCAAACTTCAGGACAGTTTTCTGTTGTGGACCCAGACCCACGGAAACGTTGAAACCCAAACATTAATATATTTTATTTTTTTTTTTTTTTCGGTTAATGAAAAACTAACTTTTTATTGTGCACTACGGATGCCTCGCGTCACCATCCGCTGGAAATTCCAGGACTCTCTCACCTGCGCGATAATATACCCAAAATGACTAGATGTCACAACTATTCTATTAAGAAAGGAAGGTGTTCACGTTGTGAACTTTAATATTAAGGAAACAAAACAAGCACACGAATAACCAATCG…
RPS1A	S_Paradoxus	1.57564	0.0192885	CAACGAAAATCGTTTCATTTTTTCCCTCATGGGTATGCTTACATACATATATAGTCTCTCCTGTATTCCTTAATAATGTAACCATAACTTACAAAAATCCTAATTAAAACTGCAGGACAGTTTTTGTTATGAACCCAGACCCATTGGAAGGAGTAAACCCAAACATCTACTGCGATTTTTGTTTTGACTTTATGAGAACCTTCAAATTTTTTTATTTTGCTCTACGGATTCCCTCGCGTCACCGTCCGCTGGAAATTCCAGGACTCTCTCAGCAAGCGTAATAATATACCCAAAATGACTAGATGTTACAATTATTCTATTAAGTATGAAGGTGTTTACGTTGTGAGTTTTGATATTAAAGAAACAAAACAAGCACACGAATAACCAATCGTTTAATC	CAACGAAAATCGTTTCATTTTTTCCCTCATGGGTATGCTTACATACATATATAGTCTCTCCTGTATTCCTTAATAATGTAACCATAACTTACAAAAATCCTAATTAAAACTGCAGGACAGTTTTTGTTATGAACCCAGACCCATTGGAAGGAGTAAACCCAAACATCTACTGCGATTTTTGTTTTGACTTTATGAGAACCTTCAAATTTTTTTATTTTGCTCTACGGATTCCCTCGCGTCACCGTCCGCTGGAAATTCCAGGACTCTCTCAGCAAGCGTAATAATATACCCAAAATGACTAGATGTTACAATTATTCTATTAAGTATGAAGGTGTTTACGTTGTGAGTTTTGATATTAAAGAAACAAAACAAGCACACGAATAACCAATCGTTTAATC
RPS1A	S_Mikatae	1.62559	0.0374014	GCAATGACATCTATTTCGTTTTCTCACGAAGGTGTTTACATACACTTGTACTTTCTTTATCTCTTAATAATGTAACAATAACTGCTCACTTACAGAAACAAAGCAAAACTGCGGGACAGGCTTTATTTACACCCAGACCCAAAGTCTTAAACTAAACCCAATCACTTCCCTTTTTTTGATTTTCAAGAAAACTTCAAGGTTTTACTTTATTCCAGATTTTCTCGCGTCACCATCATCCGCTGGAAATTCCAGGACTCTAATACCAAACGTAATAGTATACCCAAAATGAATAGAAGTTACAATTATTCTATTATGAAAAGAAGGTATTTACGTTGTGAACTTTAATATTGAGGAAGCAAAACAAGCACACGAATAACCAATCGTTTAATC	GCAATGACATCTATTTCGTTTTCTCACGAAGGTGTTTACATACACTTGTACTTTCTTTATTTCTTAATAATGTAACAATAACTGCTCACTTACAGAAACAAAGCAAAACTGCGGGACAGGCTTTATTTACACCCAGACCCAAAGTCTTAAACTAAACCCAATCACTTCCCTTTTTTTGATTTTCAAGAAAACTTCAAGGTTTTACTTTATTCCAGATTTTCTCGCGTCACCATCATCCGCTGGAAATTCCAGGACTCTAATACCAAACGTAATAGTATACCCAAAATGAATAGAAGTTACAATTATTCTATTATGAAAAGAAGGTATTTACGTTGTGAACTTTAATATTGAGGAAGCAAAACAAGCACACGAATAACCAATCGTTTAATC
RPS1A	S_Bayanus	1.46281	0.019846	ACACTTAATTAATTTATCCCGCCCCCACAACATGCGCTAGTATATATACGTATGTGTGTAACTCCTTCTGTACGCATCAGAGGTGTAAATCTATAAGCTAACTTATTACCTCAAATACCAAACGGTTGATTAGAGGACTGTCTTTTATTTTGCACCCACACCCAAGGCGGGACAAAACCCAGTCGTTTCCTAGAGAACCGGGATTTTTTCTGTGGAAAGATTTCCTTTTTTTTTTGTAGTTTCCGGATCCCTTCGCGTCGGCCATCTGCTTGGAAATTCCAAGACTCTCTTGCTAGACGTAATAATATACCCAAAACGATTGAATATTACAACTGTTATAATATCAAAAGAAGGTGTTTACGTTGTCAACTTTTATATTAAGAAAACAAAGCAAGCACA…	ACACTTAATTAATTTATCCCGCCCCCACAACATGCGCTAGTATATATACGTATGTGTGTAACTCCTTCTGTACGCATCAGAGGTGTAAATCTATAAGCTAACTTATTACCTCAAATACCAAACGGTTGATTAGAGGACTGTCTTTTATTTTGCACCCACACCCAAGGCGGGACAAAACCCAGTCGTTTCCTAGAGAACCGGGATTTTTTCTGTGGAAAGATTTCCTTTTTTTTTTGTAGTTTCCGGATCCCTTCGCGTCGGCCATCTGCTTGGAAATTCCAAGACTCTCTTGCTAGACGTAATAATATACCCAAAACGATTGAATATTACAACTGTTATAATATCAAAAGAAGGTGTTTACGTTGTCAACTTTTATATTAAGAAAACAAAGCAAGCACA…
RPS1B	S_Cerevisiae	1.3962	0	CTTAGCTTAACTCAATTTAATTTCTACAGCAAAATCCAAACGTAATATCTATATTTTTCTCGAAAAACTGAGGACAAGAGCCAATCAATCATCTATAATCCAATTTATATTATTTTTTCCCTTCTGGGTTCTTTTCTTCCTTTTCTTGTTTACCTTTTTTGCTTTTTCATAAAATAATTTCTCTAGATTTGAAGACAGCATTTTTGTACATCCATACACCATACACCATACACCATAGCACCAGTACACTATATTTTTATGAATTTTACTAAGAATTATTCCTGCAGGAGCTCCACTGAAAAAAAAAGAGCAGCATGGATGTCCGGTAGAAGTGCTACTGAGTAAATGGGAAGGACGCGGTAGATCCAGTGTGGAATCAAGGTGGTGCCGGTGTGAAGC…	CTTAGCTTAACTCAATTTAATTTCTACAGCAAAATCCAAACGTAATATCTATATTTTTCTCGAAAAACTGAGGACAAGAGCCAATCAATCATCTATAATCCAATTTATATTATTTTTTCCCTTCTGGGTTCTTTTCTTCCTTTTCTTGTTTACCTTTTTTGCTTTTTCATAAAATAATTTCTCTAGATTTGAAGACAGCATTTTTGTACATCCATACACCATACACCATACACCATAGCACCAGTACACTATATTTTTATGAATTTTACTAAGAATTATTCCTGCAGGAGCTCCACTGAAAAAAAAAGAGCAGCATGGATGTCCGGTAGAAGTGCTACTGAGTAAATGGGAAGGACGCGGTAGATCCAGTGTGGAATCAAGGTGGTGCCGGTGTGAAGC…
RPS1B	S_Paradoxus	1.26608	0.012123	CGTACTTTAACTCAATTTACCTTACACAGCCAAATGACAACGCAATGTCTGTATTTTTCTCGAAAATGTGGGCACAGAAATCAATCAATCATCTGTAATTCAATTTGTATTATTTTTTCCCTTCTGGGTTCTTTTCTTCCTTTTCTTGTTTACTATTTTACTTTTTCATGAGATAATTGTCCCAAACTAAAGACAGCATTTTTTTACATCCATACATTCTACATCGGTACACTTTATTCTTATGAAAATTTACAAAAAATAATTCGTGCAAGAGTTACCGGAAAAAAAAGAGCAACATGGATCTTCGGCAGATGAGCCGCCGAGTAAATGAGGATGGACGCGCTAAGCCAGCGCGAATTGATGTTGTGCCGGTGTGGGGCCGCCTCGGCTGGCTGGATG…	CGTACTTTAACTCAATTTACCTTACACAGCCAAATGACAACGCAATGTCTGTATTTTTCTCGAAAATGTGGGCACAGAAATCAATCAATCATCTGTAATTCAATTTGTATTATTTTTTCCCTTCTGGGTTCTTTTCTTCCTTTTCTTGTTTACTATTTTACTTTTTCATGAGATAATTGTCCCAAACTAAAGACAGCATTTTTTTACATCCATACATTCTACATCGGTACACTTTATTCTTATGAAAATTTACAAAAAATAATTCGTGCAAGAGTTACCGGAAAAAAAAGAGCAACATGGATCTTCGGCAGATGAGCCGCCGAGTAAATGAGGATGGACGCGCTAAGCCAGCGCGAAATTGATGTTGTGCCGGTGTGGGGCCGCCTCGGCTGGCTGGAT…
RPS1B	S_Mikatae	1.22109	0.0322512	CATAATATTTGACTCAATTTATATTGCACACCCTAATTACAATCTAATGTCTCTGTCTTCTCGAAAAAGCGAGCGCTAAACCGAATTAATCATCTTCAATTTAATTTATTTTTTTCATTCCCTTCTGGGTTCTTTCTTCCTTTTCTTGTTTACCTTTCTACTTTTATCACAAGACAGCGGGCCCAAATAGAAGGACTGCCTTCTGAAACATCCACACATCCACACATCCACACATCAGTACATTCTAGGATTTTTCAGACTTGCCAAAAAAAACTGTGTGATTCTCAGATAAAAAAATGAAAAGTAGCATGGGTTGATGGTAGAAGAACAGCCGGTAAATAGCGGAGAACGCGCTGGACCTCAGCGTAGAGTTCAGGTTGTGCGAGCGTGAAGCTGCCT…	CATAATATTTGACTCAATTTATATTGCACACCCTAATTACAATCTAATGTCTCTGTCTTCTCGAAAAAGCGAGCGCTTAACCGAATTAATCATCTTCAATTTAATTTATTTTTTTCATTCCCTTCTGGGTTCTTTCTTCCTTTTCTTGTTTACCTTTCTACTTTTATCACAAGACAGCGGGCCCAAATAGAAGGACTGCCTTCTGAAACATCCACACATCCACACATCCAAACATCAGTACATTCTAGGATTTTTCAGACTTGCCAAAAAAAACTGTGTGATTCTCAGATAAAAAAATGAAAAGTAGCATGGGTTGATGGTAGAAGAACAGCCGGTAAATAGCGGAGAACGCGCTGGACCTCAGCGTAGAGTTCAGGTTGTGCGAGCGTGAAGCTGCCT…
RPS1B	S_Bayanus	1.54649	0.0357869	CCTAACTCAATTCACTCTTCAGCCTTTTCTACAACCAAGTACCTACCCAACGTCTATTTTTTCTCGAAAAGATACCACCAAAGTCAATTATCCATAATTTAATCTCCATTTTTTTTTCCCTTCTGGGTTCTTTTTATTGTTTACCTTTTGATTTTTCATTTTCATCCCGAATTAAGGACTGCACAATTTGGTACACACCCACACACCTCAACATCTGTACATTATCATTTTATTATTTTTTTGAAATTTTCAGAATATTATTTTGAAAGATTTTCTTGAAAGAAAATGATACCAGTAAATGCCGAGTCTACGGTAGAAAAAGCAGTCTGACTCTTCGGGAAGGGCTAGCCCGGGGTCCAACGGGGAAGTGGTGTCGCGTCGGCGTAAAGCTGCTCCTAC…	CCTAACTCAATTCACTCTTCAGCCTTTTCTACAACCAAGTACCTACCCAACGTCTATTTTTTCTCGAAAAGATACCACCAAAGTCAATTATCCATAATTTAATCTCCATTTTTTTTTCCCTTCTGGGTTCTTTTTATTGTTTACCTTTTGATTTTTCATTTTCATCCCGAATTAAGGACTGCACAATTTGGTACACACCCACACACCTCAACATCTGTACATTATCATTTTATTATTTTTTTGAAATTTTCAGAATATTATTTTGAAAGATTTTCTTGAAAGAAAATGATACCAGTAAATGCCGAGTCTACGGTAGAAAAAGCAGTCTGACTCTTCGGGAAGGGCTAGCCCGGGGTCCAACGGGGAAGTGGTGTCGCGTCGGCGTAAAGCTGCTCCTAC…
RPS10	S_Kluyveri	0.953729	0.0130098	CGGTATTTGTACTAACCATCTTGTATAACCTCGTGTATACTAGCAAGTTCCATATGCCGCAAATCTCCCCTGAGAAGTCATGTTTAGGGCTTTAGGTGAGATTACAGAAAGGAGGGCTCTATGAATAAATGTGACTGCATAACTTCAGAAAGACCCACACATAGCAAATGTTAGCTTTTTTTTTTGAGCGTTTTGTGACCAATTTTTCAAGCGTATAATACCTGGCATAATTTAGTGGTGTATGGATGTAATTTTTTTGAACGCGAATTCGATGCCATTCTGTTTCTGCGGCGAGCTGCGACTCTCTTTCCGTGCTGCCAGTAACCGACTCTCACGCAGCGAGGTTTGCCAAACTCTCAGCGGTGGGGGGGACTCGGATTGTACCACAATGTGGCAGTT…	-
RPS10	K_Lactis	0.860209	0.0300456	GGGAAAATCGGAAATGACAGAAGTTTAGTGTGATGATATTGTATTACCAGAAGAGTGTACACTTAAGAATCCCTTTGTAAGGTATATATATCAAAGCGGAACAAAGTGCCATACGATGCTGTCCTTAATTCATATAAAGAGATATCAACCTAAAATGAGACAGAATAACACACACGTGACATACAAATACGAGGGACTGGCCAATTGCAAAACACCTGGACATCCAAAAACAAAACGCCACTTTTCGGAACACCCATACATTTAGAAAGATATTAAAGTTATCAAATGGGGAAATTGTAATCTCACCATTAGAGAAACCGAACCCAAGCAAATGTCAGGTCTCCTCACAGAGTATATCGTACAAGCTGACGTTAGGAATCACTCACTTACAAATAGCCG…	-
RPS10A	S_Cerevisiae	1.37324	0.016773	CGAAATATATACTCTGAGTTCTTGCTCCCCGTTTTGTACGATGTTCCTAATGCAAACACACGTCCTTTAAAGATCCCCTGATAGGTTTCATTAAAGGCAACTTCCATACACGTTGAAGTGCCAATTTTTTCCCTACATCCAAGCATTCTGGGTTTGTATGGGTGTTACACCGGTTTTTCTTTTTTATTTCCAGAGAAGTACAATTTTAGGCGGGTTTCAAATTTCCCCTGTGTGCGAGAAACGCTCCGGTACGCCTAGGCTCACTCCGGTCCTTCTCCCCATTTCTATCAGCGCGATAGGCATACTGTGGGAGAGCGGCACTAGGGAGACCGGTGGGAAGCACCGTATCTAGTAACGCACGCTCTTTTGCAAAAATATCCATTAATTGCATGTAACTTA…	CGAAATATATACTCTGAGTTCTTGCTCCCCGTTTTGTACGATGTTCCTAATGCAAACACACGTCCTTTAAAGATCCCCTGATAGGTTTCATTAAAGGCAACTTCCATACACGTTGAAGTGCCAATTTTTTCCCTACATCCAAGCATTCTGGGTTTGTATGGGTGTTACACCGGTTTTTCTTTTTTATTTCCAGAGAAGTACAATTTTAGGCGGGTTTCAAATTTCCCCTGTGTGCGAGAAACGCTCCGGTACGCCTAGGCTCACTCCGGTCCTTCTCCCCATTTCTATCAGCGCGATAGGCATACTGTGGGAGAGCGGCACTAGGGAGACCGGTGGGAAGCACCGTATCTAGTAACGCACGCTCTTTTGCAAAAATATCCATTAATTGCATGTAACTTA…
RPS10A	S_Paradoxus	1.45701	0.0330461	CGAAACAGTACTTTGCGTTACTGCTTCCCGTTTCCTCCAATGTCCCTAATGCAAGCACACGTCTTTTAAAGATCCCCTGATAGGCTTCGTTGAAGGCAACTTCCCACAAATATGTTAAATGTACCGAGTGCTATTTTCCTCCCTGCATCCGAACATCTCAATTTTGTATGGGTGTTGATTTGCTTTCCCTTCTTTTGTTCTAGAAAAACTATTTTGGCGAATTTCAAAATTTCCTTGTGCGCGGCATTGGATGCTTTGACACCTCTGGGCTCGTCGTGTTCTTTCTTTCCATCAGCGCGATAGGTGTGGTGCGAGATTGACAGAACGGTACGAGGGCGACCGGTGGGAGGCGGTGTACCTTGCAACGCACGCTCTTTTGCAGAAGTATCCATTAATGGC…	-
RPS10A	S_Mikatae	1.51144	0.0198841	CTAAAATAGTTTTTTTGCGCTACAGCTCTCTTTTGTTCGATTTCCTTACTGCAACAACTCTTTCTTTTAAGATCCCTTGATATGATGTGTCAAAGGCAACTTTCTACACTAGGTAAAGTCTCATATATTATTATCCTATTGCATCCGAACACCCGCATTTTGTATGGGTGTTTGATCAATGGTATTTTTTTCAAAGAGTTACCTTGGCGTATTTCAAGATCTCCTTGCGCGTGGCCGAGGTTGGAAATCCTCTAGGCTGGTTTTCGTCCTTCTGTCTATTACCATGACGAGGGAGTGCAAGGACAGCGCGAGGACAGTACGAGGGTAATCGATGGGAAGCGGTGTTTCTTGCAACTCTGGTTCTTTTGTAAAAGTATCCATTATTGGCATGTAACTTAG…	-
RPS10A	S_Bayanus	1.56637	0.0484854	CTTAAATTGACAAGTTGAGATAACCCTTTCTCTTTCCTCTTGTGCTCCTAGCGCAGAGATTCTTCCTTTAAAGATCCCCTGATAGTCTTTGACAAAGGCACCTTCTTCCCCATAAGGAAATGATACTGTTATTTCCTTTACAACATCTGTACATTCTTTGGATGCATGGGTGATATTAATCCGTTGTTCGATTTTTTGTTCCATGAAAAATAATCCAAATGTTTCCCTTCTGTGCTTTGTGCGTCTCTTCATTTTTCGCGCGCGGGTTCAGGTTCCTTCTGGATGCTTTGTGACGTTTCTGTTCAGCAGCGCAACGGATGCGATACGGAGATGGTGCGGGAAGTGGCCAGCAGGAGCCCGTGGGAGTTGGGCCTCTCAGCTCACGCTCAGTTGCAAAAC…	-
RPS10B	S_Cerevisiae	1.24899	0.00955019	ACTGAGCTTTCTTCAGTTGCTGCTAATGTATAGAAGGGTTTAGCTCATCTCATCTTAAAATTTTTCAAAATTTTTCGGAATCAGAAACGACTTAGATCACTTTGCACGCGGGCATTGAATGACTGGCCAATGTAGTGACAATAAACTCTCTAATGGTGAAATATGTACCGCGGCAACAAGTAAGTTTACGTCTACTAATAATTTGTTGAATAAAGTAAGCCCAGAAACAAGCATCCATCTGGCCAGAATAATGTTTTCCTATATGTACTTACCAATTATGTAGTTGAAAAATCATACACAAATAATAGCACTATAAATAACGAGCAGGATATTTATAAAAGAGTTTAACAACAGAGTTCAGGATTGAATATTCTCAGTAACTGCGTAATACATATTGTT…	ACTGAGCTTTCTTCAGTTGCTGCTAATGTATAGAAGGGTTTAGCTCATCTCATCTTAAAATTTTTCAAAATTTTTCGGAATCAGAAACGACTTAGATCACTTTGCACGCGGGCATTGAATGACTGGCCAATGTAGTGACAATAAACTCTCTAATGGTGAAATATGTACCGCGGCAACAAGTAAGTTTACGTCTACTAATAATTTGTTGAATAAAGTAAGCCCAGAAACAAGCATCCATCTGGCCAGAATAATGTTTTCCTATATGTACTTACCAATTATGTAGTTGAAAAATCATACACAAATAATAGCACTATAAATAACGAGCAGGATATTTATAAAAGAGTTTAACAACAGAGTTCAGGATTGAATATTCTCAGTAACTGCGTAATACATATTGTT…
RPS10B	S_Paradoxus	1.24302	0.0447123	ACTGAGCTTTCTTATGTCACTGTTAATGTATGGAAGGGTTTAGCTCATCTCATCTTAAAATTTTTCAAAATTTTTCGGAATCAGAAACGACTTAGATCATTTTGCACGCATTCATTGAATGACGTGCACTGGGAGACAATAACCACTTCACTAGTGTTACATGTACCGTGGAAAGAACCAAGTTCACACCATCTAATATTTTGTAAAGGAATGAGCTGGGCAACAACCAACCATCTGAGAAGAGTAAACTCTTTCTTTTATTTGTACTTATCAATTATGTATACTTATCAATTATGTAGCCGAAAAAATCATAGGCAAATAGTAGCACTATATACTTTTATTATCATCGCCGGTTAAAGAGACTGGCTATTTCGTAGAGTTTTCACGAGCATCTATAGT…	ACTGAGCTTTCTTATGTCACTGTTAATGTATGGAAGGGTTTAGCTCATCTCATCTTAAAATTTTTCAAAATTTTTCGGAATCAGAAACGACTTAGATCATTTTGCACGCATTCATTGAATGACGTGCACTGGGAGACAATAACCACTTCACTAGTGTTACATGTACCGTGGAAAAAACCAAGTTCACACCATCTAATATTTTGTAAAGGAATGAGCTGGGCAACAACCAACCACCTGAGAAGAGTAAACTCTTTCTTTTATTTGTACTTATCAATTATGTATACTTATCAATTATGTAGCCGAAAAAATCATAGGCAAATAGTAGCACTATATACTTTTATTATCATCGCCGGTTAAAGAGACTGGCTATTTCGTAGAGTTTTCACGAGCATCTATAGT…
RPS10B	S_Mikatae	1.17854	0.0352584	GCTGGGACTTTTCTATGTCATTGCAAATGTATAGAAGGATTTGGCTCATCTCATCTTAAAATTTTTCAAAATTTTTCGGTACCAGAAACGATTTATATCGTTTTGTACGCTTTTACTAGAGAAGATTCATTGCTGCGACAATATCTATATCAATGATAAAATAACAGGAAGGAAACATCTAAACAATATGATAGTTTGGTAAAGCAATGAGCTGATCAAGAAACTTCTATTTGGCCAGCACAGGCATTTTTTTTATCTATTCTTATTAATTTTATAGCTGAAAATATCACACACAATTAGTAGCACAAAAAAATTTCTCATCGTCAATGAAAGAGACAAGTATTTAATAAAGTTCTTGAAGAGCATTTTTGACAGCTTGATTGTAGACTAACAGTAAAG…	GCTGGGACTTTTCTATGTCATTGCAAATGTATAGAAGGATTTGGCTCATCTCATCTTAAAATTTTTCAAAATTTTTCGGTACCAGAAACGATTTATATCGTTTTGTACGCTTTTACTAGAGAAGATTCATTGCTGCGACAATATCTATATCAATGATAAAATAACAGGAAGGAAACATCTAAACAATATGATAGTTTGGTAAAGCAATGAGCTGATCAAGAAACTTCTATTTGGCCAGCACAGGCATTTTTTTTATCTATTCTTATTAATTTTATAGCTGAAAATATCACACACAATTAGTAGCACAAAAAAATTTCTCATCGTCAATGAAAGAGACAAGTATTTAATAAAGTTCTTGAAGAGCATTTTTGACAGCTTGATTGTAGACTAACAGTAAAG…
RPS10B	S_Bayanus	1.14793	0.0164424	GCTGAGCTTTCTTAATGTTATATCTAACACATAGAAGGGTTTAGCTCATCTCATCTTAAAATTTTTCAAAATTTTTCAAAATTAGAAAAGAATTCAGTCATTTGGCACGAGCGCATCGGATCACATGCTTGGCAATGATAATATCACAAGACTTTCTGTGTATAGGATATATACTATGCAGATAGGTTTTTTCACCTAGTCTGAAAGTTAGAGTTAGAAGCACAATAATTGGCTGAAGAAGGCTCTACGCAGCAGCTGGAGGTTGTCGATCCTTTGTTTTCTTTTCTTTCACCAACTATATAGCAGATCATTGACAAATAGTAGTAGAGTTGGATCATTGTAGTTGTCTTACATTGAAAAATATCTGTAATACAAACTGTTGAATACTCCGGTTCGGAT…	GCTGAGCTTTCTTAATGTTATATCTAACACATAGAAGGGTTTAGCTCATCTCATCTTAAAATTTTTCAAAATTTTTCAAAATTAGAAAAGAATTCAGTCATTTGGCACGAGCGCATCGGATCACATGCTTGGCAATGATAATATCACAAGACTTTCTGTGTATAGGATATATACTATGCAGATAGGTTTTTTCACCTAGTCTGAAAGTTAGAGTTAGAAGCACAATAATTGGCTGAAGAAGGCTCTACGCAGCAGCTGGAGGTTGTCGATCCTTTGTTTTCTTTTCTTTCACCAACTATATAGCAGATCATTGACAAATAGTAGTAGAGTTGGATCATTGTAGTTGTCTTACATTGAAAAATATCTGTAATACAAACTGTTGAATACTCCGGTTCGGAT…
RPS11	S_Kluyveri	1.60815	0.0170134	TGTATATTGTGCCTCTTGATTCTTTCTTTTTTCTTTCTTTCTGTTTTCGTGTTGGGTGTTATCTACTGCCAGAGACATGCTTATGTGAACTGTATTTAGGGCTTTTATAGAGTTTCTTATAGGGCAAATCTTTTAGTTTTTCATCTCTTGATTTTTACTTCTTTAATTCCGTGACTGCATTCTATGTTTTCAAACATCCACACATCATTCAAAAATATTCTGTACACCTGTACATTTTATTTTTCAATAAAACAACATCTGAACACCAAATCCATCGACGGCACGAGAAGAGGGAGTCCATTTTGCGAACCGTGCGCGTCGTCCAACTATCACTAGAGCCCGCTCTCGACTGGTAGGCCCTGTTCCTGCCCCCTCCTCCTCCCAGGCTACGCAACCACC…	-
RPS11	K_Lactis	1.07221	0	ATAGGATACCCCGACAAGTCTGCTGTAATAATGATGACGTTCTTTTTACATAATTACCAATAAAGTCATAATTGGTCTATAGATATATATATACACAACAAATAAAAGGTATTTCTGGTTTATGAAGTTATTTGAGAGGGCTGGTTTCGTATCCTATCTCCATTTCGAACTCAAGTTTCAGATCATTTCAGTGTCTCCCATAGTGACACTGACAGTGACTTGAAACCATGTCTTGGCGAAAAGAATCGCATGAGACTGTCCCGACACCCAGACATAACAAACACCCATGCATCATTGGTCGGAATTATCTTGCACCTCGTGACAAAGTGAGATTTCCTGATTAAGTATATGGTGCTTCAGCAGTATTTTGAAAAAGTTGGTTTGCAGGAGTGCTGCAGG…	-
RPS11A	S_Cerevisiae	1.32343	0.017211	ATGTTGTTTCTGTTCTGCCAATCTTTTTTAATATATTTCTCATGATAGCTCCATAATCTTATATACATGGTTGCATAATAAAATAAATAAATAATGAGCCTTTACCAATCGATAGTGTTCATCGCACGTAATGTTGTTAATTCAATAACGAGAATATTGCATGACCATCCGACAAATAGTTCCCTCATAACCCAGACCTATTTTATTACACCCAATCATTCAGGAAAAAACATTTCTTTTCATCTTTTTCACGATTTCAAATATTGTTCCGCGGATACGCGACACTATTCCCAGCTAATAATATTCCCGGTGAAAGAAAATTCCAGGCCAACCCAAGTAAGTCGTCCGCTGGGTGGACGCCCCCACGAGTCAGTGTTTCTGCCTAAGTTTACGCGGACC…	ATGTTGTTTCTGTTCTGCCAATCTTTTTTAATATATTTCTCATGATAGCTCCATAATCTTATATACATGGTTGCATAATAAAATAAATAAATAATGAGCCTTTACCAATCGATAGTGTTCATCGCACGTAATGTTGTTAATTCAATAACGAGAATATTGCATGACCATCCGACAAATAGTTCCCTCATAACCCAGACCTATTTTATTACACCCAATCATTCAGGAAAAAACATTTCTTTTCATCTTTTTCACGATTTCAAATATTGTTCCGCGGATACGCGACACTATTCCCAGCTAATAATATTCCCGGTGAAAGAAAATTCCAGGCCAACCCAAGTAAGTCGTCCGCTGGGTGGACGCCCCCACGAGTCAGTGTTTCTGCCTAAGTTTACGCGGACC…
RPS11A	S_Paradoxus	0.946492	0.0038559	ATGTCGTTTCTGTTCTGCTAATCTTTTTTAAATATATTTTCCATGATAGCTCCATAGTCTTATATACATGGTTGCATAATAAAATAAATAAATAATGAGCCTTTACCAACCGATAGTGTTGATTAGACATATCAATTGTTACATAAAGAAAGTTTGCTTAGCAACCCAAGACAAATAGTTCCTTTATAACCCAGACCTTTCATATTTTTACACCCACTCACTAAGAAACACTTTCCTTTTTTTTTCTCACATTTTCAAGAATGTTTTACGGTTACGCGGCACTTTTCCCTGTAAATAATGTTTCCTTGTAGAGGCAATTCCAGGCTCACCGAAGTAAGTCGACGTTGGATGGACTCTCCGATGCCTCTGTTTTCTGCCTAAGTTTACTGTTCACGCACT…	-
RPS11A	S_Mikatae	1.34125	0.0288409	TTGCCTTCTTGTTTCGCTAACCTCTTTCTAGTATGTTTTTGTTGATAATTCCATAGTCTTAAATACATGGTCGCATAATAAAATAAATAAATAATGAGCCTTTACCAATTTATAATGTTCATTTGACCGTAGTAGCAGTTGTTCCGTAAAAAAAGACTCTAAATTCACCCACAAAAATATTTCCTTTATAACCCAGACCTTTTATTGTTACACCCACTCCTTATAATAGGCTTCCCTTCATGAATTTTTTTTTTTGCATTTTTTTGAGATGGTTTCACCGCTATTTGCGACACTTTAGCCCGGAAAATATCTTCGCTTGGAGGCTCAATTCCAGGCTCACCTAAGTGGACCGTTGGTTGGGTTCCCCGACGTGACTGTGTTCACCTGCCCACGCCTACA…	-
RPS11A	S_Bayanus	1.54453	0.0281579	CTGTTGCTTTGTTCTACTATTCTTTTTTCGAATGTATTTCTCTATAATAATTCTATATCCGTAGAGCTATATACACAATCCCTTAAATAACTTTACCATTCTCACGAAAAATAAAACGAATGAAAAATGAAGCCTTAATAACCAATAGTAATTGAACGAACCACATCAATCGTAGGAATAACTTCGTGTAGTCTTCAAAACAATTATACCTCTTAACCCAGACATATCTTACACCCATTCATTGTATGATAACTTTTCAATGATACCGTTTCTTCCTCTCCAAGGTCGGGCAGCGCCCCGTCCAGCGTACACACTCTCTCTCTCTTTGGGCGGGCCCTAATCCTAGGCAGAGAAAATACAGCGGTGGTTAAGCCCGGTCCGCGAAGCCTGGTTTTTCGG…	-
RPS11B	S_Cerevisiae	1.19454	0.015173	AGAAAGCTATAAAAAATTTGAATTATACTCATTCAGTTAGTTTTTTATTAGTAATGTACAAGTAAATAGCGTATAATATATAAAGGTTTTACGTTTCTCTCAGTATCTGGGAATGCCTTATTATCGATATACACAAGAATTTCTGGAAGAAATATTTCCTTGCTGCACCCATACAATTCTAAACCCAAACATGTTTCCCGCTTTGTTTTTATTCCACACTCGGCATATTGCGTCTATGAAAAAGATGCGAAGTGTCTTTGTGAAATGAGGAAGTGTTCTCGCTAGAGTCCGCCTGGTTCCACGCCAACCTTTCAGCGGGCAAGTCCAATAGCTTTACGTTTCCCTTCTCTGCTGCGTCTGTTGAAAATCTATAATCAATAGGTAAAATAGTGATAATAA…	AGAAAGCTATAAAAAATTTGAATTATACTCATTCAGTTAGTTTTTTATTAGTAATGTACAAGTAAATAGCGTATAATATATAAAGGTTTTACGTTTCTCTCAGTATCTGGGAATGCCTTATTATCGATATACACAAGAATTTCTGGAAGAAATATTTCCTTGCTGCACCCATACAATTCTAAACCCAAACATGTTTCCCGCTTTGTTTTTATTCCACACTCGGCATATTGCGTCTATGAAAAAGATGCGAAGTGTCTTTGTGAAATGAGGAAGTGTTCTCGCTAGAGTCCGCCTGGTTCCACGCCAACCTTTCAGCGGGCAAGTCCAATAGCTTTACGTTTCCCTTCTCTGCTGCGTCTGTTGAAAATCTATAATCAATAGGTAAAATAGTGATAATAA…
RPS11B	S_Paradoxus	1.16395	0.0315638	TAGGAAAAAAAATTATAAATTTGATATATATTCATTCAGTTGGTCCTTTGACAGCGATGTACAAGTAATTAGCGTATAGTAAATATGTATAGTTTTACGCTCTCGTCAATATCTGGGAGTACCTTATTACCGTTGGACAAGATTCTCTGAAAAAACATTTCCTTCCCGCACCCATACATTATTAAACCCAAACATTTCAGAGCACTGTCTCTTTTCCACGCTGACCGTATTGACCTTATCATAGAAAAGATGCGATGCGTCTTTGTGAAATGAAAGAAGTACTCTCGCTGGGGTCAGCCAGGTTCCACACCATCCTTTCAGCGGGCAAGTCCAGTAGCTTTGGGTTTCCCTTTCTCTGCTGTCCTCTGTTGAAAATCTATAACCAATAGGTAATAGTGA…	-
RPS11B	S_Mikatae	1.04011	0.0285431	AAAAATAATCGAATTCTTATATATATATATATTCAGTTGAATCTTTGATAGCAATATATAAGTAAATAGCGTATGGAATATATACGGTTCTATGTCACTATTTGAACACCTCTTGTTGTTACGCACAACTTTTAAAAGGGAGACTTCCTTAGTACACCCATACAATAATTACACCCATACATTTATTATTCGTTCTCTATTCTGTGTCTATGTAATGAATTTCATTATGAAAAAGTGCGTCTTGTGTGAAGCGAGAAAGCATTCCCACTAAGGCCCCGCCCAGATTCTCATAATCATCCCTTCAGCGGGCACATCCATAGCTTTGGATTTCCCTTTCTCTGCTGTCTGCTGAAAATCAACATCCAAGAGTGTTAAGTGATAGCATAATAGGTGGTGAAA…	-
RPS11B	S_Bayanus	0.87907	0.0294119	GAAAAAAAAAAAAACGCTTTATATAAATCTGGTATGCCGATGAAAAGTTGGTGCTTCGGTAACGATTTATAAAGTAGATAAGGTATTTATAGCTTTACTTTCTGTCAATGTTCAAGACATAACTTCAACGTATACAAGAGTATTTTCGGGACAGCTCTCTCGATATTACACCCATAACTTAGAAGCCCATACACCAAAAAAATGCAGACTTTCTTTCTTGTAAAGTCGCGTGGTGAGCTTCTTCCCAAAAAAAGTGCGTCTGCTGCGGATGACAACTAGCGAGTGGACCGAGCTCTTTCTGGGATCGGCCTCGGTTTAGCTTGCCTGGCTTGACAGCCTTCCTTTCAGCGGGCATGTTCGGTAGCCTGGAATGTCCCGTCCCCTGCCGTCCCCGTTGAA…	-
RPS12	S_Cerevisiae	1.5009	0.0192191	TTTTTCCCTTCAGGAAACGGTGATTAATGTCTTCTTACAAGTTAATGAATAGTATATATATGTAAAAAAAAATTCTGCTTCATGTATATACGCACCTCGTTATTGAGGTATTGCGAATGTAGCAGTTGAATAAGCAAAGACGAGGTTTGTACATCTTGGCATATTAAATGGTTATTTCGGGGTTTGTTTCGGCTCAACGGTGATATAAAAAGAAATCCAGTACTGTTTACCATTGTGCATCCGTACATTTGATTTGTTTACAACATCTTCACATTTCCATTGTGGAATCATTTTATTTTTTTCAGAATACCTTACCCGCAAGCAAACTTTCAAGCAAACTTACAATTTGCAAAATTTCATCGAATTCTCCGCAGGACATATTATAAAAGTTATGTCATC…	TTTTTCCCTTCAGGAAACGGTGATTAATGTCTTCTTACAAGTTAATGAATAGTATATATATGTAAAAAAAAATTCTGCTTCATGTATATACGCACCTCGTTATTGAGGTATTGCGAATGTAGCAGTTGAATAAGCAAAGACGAGGTTTGTACATCTTGGCATATTAAATGGTTATTTCGGGGTTTGTTTCGGCTCAACGGTGATATAAAAAGAAATCCAGTACTGTTTACCATTGTGCATCCGTACATTTGATTTGTTTACAACATCTTCACATTTCCATTGTGGAATCATTTTATTTTTTTCAGAATACCTTACCCGCAAGCAAACTTTCAAGCAAACTTACAATTTGCAAAATTTCATCGAATTCTCCGCAGGACATATTATAAAAGTTATGTCATC…
RPS12	S_Mikatae	2.3635	0.107526	TTTTTTCCTTTAGGAAACGGCGGTTAATATCTTCTTATAAGTTAATGAATGAATAATATATGTTATATATAAGAAACGAAAAAAAAAATTCTTTGTCATGTATATACATTGTCATTGTAGTGTGGAGAATGTAACAGCTGAATAACGTAGAGATAAATTCTCTAACATCCTTGCATATCGAGAAAATGCTTGTTCCCGGTAACCGCATTTTTTCTGTTGTCAGTAGTATTAAAGAAAAATGAGGCACTAATTTTTTATTTCATTACATCCGTACCTTTATGACATCTTGACATTTTTACTGTTGGAGTTTTTCTGTTTAATTTAAAAACTGAGTAAAAAGCACTTAGAAAAATTACCCGCAAATATAATCTCTTCCAAGCAAGTTGCAAAATTTCATTT…	TTTTTTCCTTTAGGAAACGGCGGTTAATATCTTCTTATAAGTTAATGAATGAATAATATATGTTATATATAAGAAACGAAAAAAAAAATTCTTTGTCATGTATATACATTGTCATTGTAGTGTGGAGAATGTAACAGCTGAATAACGTAGAGATAAACTCTCTAACATCCTTGCATATCGAGAAAATGCTTGTTCCCGGTAACCGCATTTTTTCTGTTGTCAGTAGTATTAAAGAAAAATGAGGCACTAATTTTTTATTTCATTACATCCGTACCTTTATGACATCTTGACATTTTTACTGTTGGAGTTTTTTTGTTTAATTTAAAAACTGAGTAAAAAGCACTTAGAAAAATTACCCGCAAATATAATCTCTTCCAAGCAAGTTGCAAAATTTCATTT…
RPS12	S_Bayanus	1.78232	0.0132225	TTTTATCCATATGGAAACGGCGGTTAATATCTTCTTATAAGTTAATGAAATAATATACATAAAAAAACGAAAAAAAAAAAAGAAAATTCTATCAGGTGTATTCGCTCGATCTCTGAGATGTTCCGAGATGAAGAATTGCGTATTTGAAAGGAACTAATGATCGTAGGTGACTTGAAAAATAAAATAAAATGCACAATAAGTAGTAAGACACAGTACAAGATTGCAGAGAAAAAATTATAAAAACTTATTTCCTTGACAACATCCGTACATCTTTTAAATCTTGACATTTGAGCTCCTAATTGTTTTGCTTTTTTGCTGTCATCTTTTAACAAATGGAAATAAACAAAGATTACCCGGACAGCTACATTCATACCAAGCAAGCTTGCAGTTTGCGAAATT…	TTTTATCCATATGGAAACGGCGGTTAATATCTTCTTATAAGTTAATGAAATAATATACATAAAAAAACGAAAAAAAAAAAAGAAAATTCTATCAGGTGTATTCGCTCGATCTCTGAGATGTTCCGAGATGAAGAATTGCGTATTTGAAAGGAACTAATGATCGTAGGTGACTTGAAAAATAAAATAAAATGCACAATAAGTAGTAAGACACAGTACAAGATTGCAGAGAAAAAATTATAAAAACTTATTTCCTTGACAACATCCGTACATCTTTTAAATCTTGACATTTGAGCTCCTAATTGTTTTGCTTTTTTGCTGTCATCTTTTAACAAATGGAAATAAACAAAGATTACCCGGACAGCTACATTCATACCAAGCAAGCTTGCAGTTTGCGAAATT…
RPS12	S_Kluyveri	1.09243	0.019443	CAGTCATATGACCGACAATCAAAAGAGAAATATACATTGTGCAAAAATATTGAAGCAAGCATCAGGATAATAAGTAAATACTGTCCCTCCAGTGCTTTTCAAAACTTATAGTATGTATGATATAGAAGTTCTCCAATCCCTACCAAGGGAGTCTGTAATAGCTATGAGATATAACGAGTTGCTTATAAAAACATCGATCTACAAAAAGATATATGACTGTTTCTTACTAACAACCCACACACATTAATTAAAATGAAACCCATTCACCACATCAACATTTTTCAAATGATGGAAGTTGGGAGCCGAAAAAAAGATAGTTTTCAATTTAGCCTCCAAAATATATGGTATCGCTATTAACGTATTGAATATTTATCTCTTCTGACGGGAATTCTGAAAAAT…	-
RPS12	K_Lactis	0.489753	0.0119394	TGACGGACTTTTCAACGGAGATATGCTGAAAGTATTTATGACATCCGTACTGTCTGCAAACAGCAGTTCAAATTCGTGAATCGTCAGAGTTGACAGAACGACTACTAGACTATAGCGCTTATTGATATTTAAACTACGAAGCGCGACCCATGCTGTTGTATTCATCACTTCTAATCTTAATGAAAAGACTTGAACAAGATTAAAATACCAGTGACTGTCATATTTGTTTGCACCCGTACATATTCCAAAATCCTCCTCAAATCTGAAGAAAACTAAAGAATTTCCAAATATGGCATCTACACGTCAACATAGTACGCGCCACCACGGACTAGTCTTAAGAAAAATGTTCACGAAAACACCTGGACATTACAGCGAAAGAAAAGGACGCAGTTGTTCTGC…	-
RPS13	S_Cerevisiae	2.34372	0.016634	GTCTATCTTAAACACTAAACTACCTCCTATAATCATGTAGTGTACTTTAAACATTTTTTTATCTTCATAGCAATAATATAAGCCTTTTACCACCCATAAACCATAAAGTAGACCCAAACATTTTTAAAAAAATTTTACGTTATAATTTTTTCTTTGTCGTTTTTTCTGAGCGCGCAAAGTAGCGGTGAAATTTTGATACGAATGAGATTTCCACTTCTGTACAGATGGAAATTTATGTTGGCCGACATATATCACAGTCGTGATTGAATTAACAATTTCTTTCTCATTAATATTTATTCTAAACGGTTAACCACTAAATCAATCAACAACAATCAGTCAAA	GTCTATCTTAAACACTAAACTACCTCCTATAATCATGTAGTGTACTTTAAACATTTTTTTATCTTCATAGCAATAATATAAGCCTTTTACCACCCATAAACCATAAAGTAGACCCAAACATTTTTAAAAAAATTTTACGTTATAATTTTTTCTTTGTCGTTTTTTCTGAGCGCGCAAAGTAGCGGTGAAATTTTGATACGAATGAGATTTCCACTTCTGTACAGATGGAAATTTATGTTGGCCGACATATATCACAGTCGTGATTGAATTAACAATTTCTTTCTCATTAATATTTATTCTAAACGGTTAACCACTAAATCAATCAACAACAATCAGTCAAA
RPS13	S_Paradoxus	2.33294	0.0372513	GGCATGCTTAAACCCTAAACCACCTATTAGAGTCACATAAAGTACTTATTATTTTTTTTATATTTTTATAGTAACAACACGAGACCGCTAACACCAGTTAACACCCGTAAACCGCCATGGTAGACCCAAACACACTGCACTTTTTTTTCGCATTGTAATTTTTTTGTTGTTTTTTCTGAGCGCGCAAAGCAGCTGTGAAATTTTGATGTGAATGAGATTTCCACTTATTGAACAGATGGCAATTTATCTTGGCCGGCATATATCACAATGATGTTTGAAATTAAACTTCTTTCCTCCCTCTCACTTATTTGATAGTAAACTACTAAAGCAATCAACAACAATCAGTCAAA	-
RPS13	S_Mikatae	2.27515	0.0450012	GTTTTCATCAATCGCTTAACCACATGTGTATTACCGCATTAGACACTTAATATTTACTTTTTACTTTTCATAGAAACATTATAAAAGACTGCTTTAGAACCCATAAACCATAATATGTTTGGGTCAAGAATTTTTTTTAGTGTTACAGTTTTAATGGTTATTTTTCATGAGCGCGCAAAGAAGCTATGAAATTTTGACGTTAGAGAGATTTATAATTGTTGGGGAATAGTAATTTATCTTCGCTCGTATATTTTCAAATCTGATTTTAATTGTAATCCCTCTCCTTCCTATCAGTGAAAGAGCAATCTACTAAGCCAATCAACAACAATCAGTCAAA	-
RPS13	S_Bayanus	2.38384	0.0593545	GTGAATACGGAAGTTTATCACCTAATATAATCACATAGGACATATCAGTAATTAGATAACTTCATCTTCAATATCTACAAACCAAGACTGTTTTTATCCACCCACAAACCTCAAATTAAAGACCCAGACAGTGCGCGAATTTGTTTTTATTTTGTCTTCGGTCACTGTAATTAAATTTTTCAAGCGCGCACGCAAATTTGAAATTTTGAAATAGAAAGCCTGCGTTGTTGGATGGGCACTTCGCAACTCATCTTAACTGTCTTAAATGACATTTTGGTTTCTTCATAAGTTTTACTCTCATTTCTCTCAGTCTTTTTCTATCAATAAGACAATCAGTCAATAAACCAATCAACAAAAATCAGCCAAA	-
RPS13	S_Kluyveri	1.49669	0.0129023	GAGAAGCTTATACTTATGCATTAAATGAAAAAAAAAAGAGAAAAAGAAAATGAAAAAGAAAAAAAAAAATATTAACAGAATAAAGCACTTAATAGATCTTTGGCTCGGTTATTATCATTGGTTTTTTATTATGTATATAGCCTGTTAGAAACTTCTTCTCGTCTATCTGTTCTCTTCTCGAGAATCACGTGATTTACCTCTTCATTGTACTTTTTAATTCCGAGAAATGAAATTGCACAGACAACAAAAACATCATACATTAGGGTTAAACAAGCACAAGAAATGTCTAGCTTATACCACATCGGTACTGAGACAAAGAACCGTATCAAAAAGTTCCGTACAGCTACAGCAAGATCCGACAAATTAGAGGTTTTGGTAATTAAAATTCAACCCAAACCT…	-
RPS13	K_Lactis	0.410069	0.00797155	TAACATACTTTTGCATGCCTTCTTTAAGTTGCTACAAATTGGGTAGCATCAATTAGTTAAAGATGTATGCCATATAATTCCGGTATTTCACAACCCATATTCAATCTCCTTATGAGCCAAGGGTTCATTGACAATACTGTGACACCTGTCCTTTCATTGGCGTATCGTTTGTATCGATCTTGAGGTAGCAGCTTGATGGAGGAGAAACATAAGTCACGTGAACAGAGTTCAACCAGGACTGCCAAAATAACACCAGTACACCATCAATATAAATATATTCGCAAGGAAAGAATTTATCATAATGATTTCCAAATAGGGCAATAAAGTATGCAGAATATTTTGAGTATTTTTCAGAACAGCTATCTCGAGAACGTTTGAAACCTTCCATAACTTTAATAT…	-
RPS13	D_Hansenii	0.0369916	0.00294231	TGACTCTTATCAGTAGTAAGTTCATAAAATATCTCGATCATTCAATACTCCATGTATAGTACAATTGAACCACGCACGCCTTTTCTACTTTTAAATGGGACAAAATACGATAAATATGGGGAAACACTAGCCATAGTGGGAATCCAAAGAATTAGGTCGTAAATTTATTTAGAAAGAAGACAAAATTATCCCAGATGGTATACATATACAATATCACGACATATCAATGCATTATACTCAATATCGGCAATTATATTCTGGAGAAGGTACATTCCTAGTTCCCATATATACACACCTTAAGTAATGTTCATCACATATATTTTTGGTGAAAAATGTCGTGTGTGGTCAATTTCCGTAAAGAAGTTTTCGCTCTTACAACCATCTGGTGAATAAAAAAAT…	-
RPS13	Y_Lipolytica	0.0354846	0.00258851	GTACGTATTAATGACATACTTCTTTGACCTCGACAACGTAGCTCCCCCCAAGCTAACCAAGCTAATTCGTTATCTCGCATATCGGCAACTCTAATCGGGGGAGAAGGAAATATGAATTGCGACAAACATAGGTAAGTGATTCTTGGTGGGTGCTTCTCACACACAGGTAATGCCTGTTACCATTCTGTTTCCACTCGTTCTTTGTTTCTGTACTTATGACCAATGTTTTCGCGATCTTGGGTCTCAGATAAACCACAAGTGAGACAGTTGCCAAAGACTCTAAAAAGGGCTAAAAACAGCAGTGTGAAAGCATACAGGATGTGGTGATTGTATCTATAAGAAGATACTATTGCAACTGTCTATGTTGAGGGACAGATTACTTGTACGGGGGTGTCTGGT…	-
RPS13	S_Pombe	0.219283	0.009071	TACTAGGGTAGGGTTTTAATAACAACGAGCAGTCACGCTTTCTATGTGTTTGAAACACAACCTAGAATTTTATTTCTTCAGCACACACCTCTCACTCAAAGTTGCACCTTAACCAAACAAATTAAATCAAA	-
RPS14	S_Kluyveri	0.520612	0.018292	ATTTTGGAGTTTGCAGTTATGCACGTGTGTGTGTGTGTGTGTGTTTGTGTTCTAGCTGCAGCGATCGCTAGCCCCTTTGAAGCACGCTTCGCTCGATGTTCGCGCCGAGGACGAGAGCATTATCTTGTTCTCGAGGGCATGCGACCAGTACGTGCTGTTACCCGGGCCTATGCTGGCAACGCGGCGTGTGGGAGAATCTGCCGCTTGCAGAGTCCAGCGCGCGGTCCTTCTCCCTCCGCAAGCTACTTTTATCTCTGCCACTATTACTGCTACTACTTCGAATGTATGGTTTTTTTTTTTTAAAGAAACCAATTTACATTCCAAAGAACGGGTATTATTGTAGTGGATTTGTGACATATCGCAAGACAATATCTTCTCTACAACTCAGTTCGAGAACAA…	-
RPS14	K_Lactis	0.864712	0.0407646	CCCCGATTCTTTGGAGGAGTAAACTAATTGCCATACGTTAGTTCAGTCTCAGAGTATAGTGTTTTTACCGTTATCATTAACTTCTTTATGCGTCTTAGTTACCATTCGAGATTCATTTCCAGAAGAAAGAATAGTTACTAATATTATTACCCGGATTTATCTGACTTTTGAACTTTTTCATTTTGTTCGTTCAAGAAAATTTAGTATAAAAGATGAGAATAAGATGCATTATTATAAACAATACTATACAGTAAGTTGAGATACGTCCGTTTTGATCAGGTCATAAGAAAGCGTACATTCCTCAGAACAGGTATTATTGTAGTGGATTTGTGACTCTCCAGACAATATCTTCTCTACAACCTGGTTCGAGATTAAAGCTTTCAGTTTGAAAATGGCTGT…	-
RPS14A	S_Cerevisiae	1.45088	0.013032	AGGGGCCGATGCAGTAGGGACAAATGCTATAGCTTTGAAGGCTTCTTATTTTCCCCATTACCCGGATTACAAAGTCACTACCTTCATCACCCGTACGAGTATTAAGTAATAATAACTAACAGTTTGGAAGGCTCTATATTTTAGTCTATTTAGTTGCTCTTGGTCTTGCTTTATTATCAAGTCTGCACTCTTCCTTTCTTCTAGGCATATATCGCCTTATCAATGGGCTGAAGAAAATAACCGCTGAAGTCGAAATAGATATGACAAGTTGCTTCCTGTCTTTATGGTCTGAGAGCAGTAAAAAAGCTTCATGGTAACTTTATTAACATACCGCAAACAAAGCTTTGCAACGCAAATTTTTGGTGAGCTTTTGCTTCAGCAATGTATTTTCTTTAAGCC…	AGGGGCCGATGCAGTAGGGACAAATGCTATAGCTTTGAAGGCTTCTTATTTTCCCCATTACCCGGATTACAAAGTCACTACCTTCATCACCCGTACGAGTATTAAGTAATAATAACTAACAGTTTGGAAGGCTCTATATTTTAGTCTATTTAGTTGCTCTTGGTCTTGCTTTATTATCAAGTCTGCACTCTTCCTTTCTTCTAGGCATATATCGCCTTATCAATGGGCTGAAGAAAATAACCGCTGAAGTCGAAATAGATATGACAAGTTGCTTCCTGTCTTTATGGTCTGAGAGCAGTAAAAAAGCTTCATGGTAACTTTATTAACATACCGCAAACAAAGCTTTGCAACGCAAATTTTTGGTGAGCTTTTGCTTCAGCAATGTATTTTCTTTAAGCC…
RPS14A	S_Paradoxus	1.55236	0.0428337	AGGGGTTCGATGCGGTAAGGACAAAGATTCCAACTTTTAAGACTTCTTATTTTCCCATTACCCGGATTGTAAAGTTACTGCACTACCCGCTTCCAGGAGCACTAAACGATAGCGAGGGACAGCTTGAAATGCCAATACATTTTAAGACCGTTAACTTGCTCTTGACTCTCCTTTATTGTCTAGTCTTTATTGCTTCTTTTCTCTGGGGGGACATCGCCTCATCATTTGGTTGAAGCAGGGCGGAAATAACCGCCGAAGTCAAACTGGATGTCAAGTTTTCTTCTTGTTTATGGCCAGATAGAAACCAAAAATATCCATGACACTTTGTTCGGTATACCATAAACTAAGTTGAAAAGTGGACTCTTCTGGACCTTTGCTTGAGCATTATGTTTTCTTTGA…	-
RPS14A	S_Mikatae	1.48003	0.0494483	GGGGGTCGATGCGGTGGGGACAAAGATGCTGACTTTGAAGGCCTCTTATATTTCCCATTACCCGGATAGGTTGTTTACGACATCGTCGACCATATTGAACAATAATGATGGGCAGCGGCGAGTGTCGAATTGTTTTCAGACCATCTACTTGTCCTTAACCGTGCCCCGTTTATACCTTCGTTTCCCTCAAAAGATGAGAATTCATAATTTAGCAATAAGTAAGGGGGAAATAACCGCTGATTTTAAGCTAAGGCCTGCCCAAGTTCCACTTGTTTGTGGTTATACACAGAACAAACGACTTGATAATAGTTTGTGCTGTAAAACAATTTCAAAAATATGTAATAGTGTTTTCCGAGTATCATGTTTTCCTGGGATCATGAATGGCATTCTACTATTTAT…	-
RPS14A	S_Bayanus	1.68624	0.0669386	AGGGGCCGATGGGTGGGGACAGAGACTCTAAATCCAAGACTTCTTGTATTTCCTATTACCCGGTTTCGTAGATTATCGCGGTGCTTTAAATAACGAGTAACAATGAGGATTGGCAATGGAGAATAATAGATATTGTCGTTTTCGGCTGTCTTCTCCTCAATTAAATTCCCTTCCTTTTAGTCGGAATAGAATGCCTTATTTTCTTTTATGATTAAACTTTCATTATTTGCTTATAGCACCTTCCCGCAGGCAGCAAAATAACCGCCGAAGGCAAACTTAAGGTTAATACCGCTGATGTCTCTTTATTGATCACTAAACACTACTAAAAAAAGCTGGCTGAAAAATTGTTCGGTCTTCAGTTTAGCAACGTGACAAATCCATATCTTTTGGTGTTATGCT…	-
RPS14B	S_Cerevisiae	3.08802	0.0210933	CGTCACACTGCTCTTTCACTTGTTGATCAAATTTACTTTGATGATATTTAATGGCTTGACAAATTCGTTCATCTTAATTTCATACATAATTTCATCCTGAAATCCTCGATCATTTTCGAGACTGTTTTTCGAGCTTGATTTTATATGTGGTGTAAACACATCATTGTACATCCTTGCACCACACTGAAAAGAATATGGAAAAAATTTCAAACTTTTTAATGGGTGATAGACTTGAAAAACAAAACGGAATAAAAGATATAGTCGCAAGAACTTGCCTTCTACGAGTATAAAAGCGGTACTATTCCTTCTGTATGCATCTTCATCGCAAGAGAGAAAAAGACTGAAATCAACAACTCCCAATAACAATTAAGA	CGTCACACTGCTCTTTCACTTGTTGATCAAATTTACTTTGATGATATTTAATGGCTTGACAAATTCGTTCATCTTAATTTCATACATAATTTCATCCTGAAATCCTCGATCATTTTCGAGACTGTTTTTCGAGCTTGATTTTATATGTGGTGTAAACACATCATTGTACATCCTTGCACCACACTGAAAAGAATATGGAAAAAATTTCAAACTTTTTAATGGGTGATAGACTTGAAAAACAAAACGGAATAAAAGATATAGTCGCAAGAACTTGCCTTCTACGAGTATAAAAGCGGTACTATTCCTTCTGTATGCATCTTCATCGCAAGAGAGAAAAAGACTGAAATCAACAACTCCCAATAACAATTAAGA
RPS14B	S_Paradoxus	1.93299	0.0705438	TTTTGCACTGCTCTCTTAATTGTTAATCGAGTTTACCTTCATATTGTTTAATGACTTGATAAATTCGTTGATCTTAATTTCATACATAATTTCATCCTAAAATCCTCGATCATTTTTCGAGACTGTTTCTCAATTTGTTTTCATGTGTGGTGTAAACGCAACATTTTAAATCCTTTCACCACACTATAACTTATATGAAGAAAATCCTGTTTTTTTTTTGGGGGCACTCACGTAGAAAATGAAACGGAATAGAAATATGGTTGCAACAATTCTGTCCTCTCCGTATATAAGAAGCAATGTTTCTTCAGCACGCATCAGGATCACAGCAGTCCAGCAATTACAAAACAATTGTAATCAAAAACTCATCGATAACAATTAAGA	TTTTGCACTGCTCTCTTAATTGTTAATCGAGTTTACCTTCATATTGTTTAATGACTTGATAAATTCGTTGATCTTAATTTCATACATAATTTCATCCTAAAATCCTCGATCATTTTTCGAGACTGTTTCTCAATTTGTTTTCATGTGTGGTGTAAACGCAACATTTTAAATCCTTTCACCACACTATAACTTATATGAAGAAAATCCTGTTTTTTTTTTGGGGGCACTCACGTAGAAAATGAAACGGAATAGAAATATGGTTGCAACAATTCTGTCCTCTCCGTATATAAGAAGCAATGTTTCTTCAGCACGCATCAGGATCACAGCAGTCCAGCAATTACAAAACAACTGTAATCAAAAACTCATCGATAACAATTAAGA
RPS14B	S_Mikatae	1.69996	0.0355227	CATCTCTATTGCGCTTGCTTAATCGGTGTTCGAAATCACTGTCTTAGAAATGTAAATTAACTTCATGTTTTCGCTAATCTTACCTTCATACATAATTTCATACTAGAATCCTCGATCTTTTTTAGACTGTTTTCATCATTTCCAATTTAAAATGTGGTGTAAAAGCTACAAATTAAATCCTTGCACCACACCATATGTCTTAACGCAATAATTTTACTTTTACAGTTTAACATAAGAAAATGGACAGGATTAGAACGCATGATAGCAATGATTCGTTCTGAGCGTATATAAGAAGTGCCGTTTCTTCAGTATTGAAGTCTAAAACCTACAGTCATAAGTGAAAAGTAAACAGACACTAGAACTCATCAACAACAAATAAGA	CATCTCTATTGCGCTTGCTTAATCGGTGTTCGAAATCACTGTCTTAGAAATGTAAATCAACTTCATGTTTTCGCTAATCTTACCTTCATACATAATTTCATACTGGAATCCTCGATCTTTTTTAGACTGTTTTCATCATTTACAATTTAAAATGTGGTGTAAAAGCTACAAATTAAATCCTTGCACCACACCATATGTCTTAACGCAATAATTTTACTTTTACAGTTTAACATAAGAAAATGGACAGGATTAGAACGCATGATAGCAATGATTCGTTCTGAGCGTATATAAGAAGTGCCGTTTCTTCAGCATTGAAGTCTAAAACCTCCAGTCATAAGTGAAAAGTAAACAGACACTAGAACTCATCAACAACAAATAAGA
RPS14B	S_Bayanus	2.60732	0.0922237	CATTTCAGTAGCGCTTTCTTGAATGTTCCTCGAATTGCTTCTTCAGGACTCTCTAGTGACTTCATTTATTCGTTGATCTCAATTTCCTTCATAATTTAATCTCAAAAACCTCGATGTTTTTCAAGACTGTTTTCAACAATCGAGTTTAGTGCGTGGTGTAAAACTGGCACTATCCATCCTTTCACCACACTGTAAACGCTTAATACAAAAATGTATTTTTTTTTATGGAAGCTTTGAGTTGTAAAAAAGATACAACGCACAATTGCGGTGATTTGGTCTTGGCCTATATAAGAAGCTATTGATTTTTAAAATCGACTCACACTTTAGATCTTAAAAATAACTAACTAAAAGCTATAACTCATCGATAATAATTAAGA	CATTTCAGTAGCGCTTTCTTGAATGTTCCTCGAATTGCTTCTTCAGGACTCTCTAGTGACTTCATTTATTCGTTGATCTCAATTTCCTTCATAATTTAATCTCAAAAACCTCGATGTTTTTCAAGACTGTTTTCAACAATCGAGTTTAGTGCGTGGTGTAAAACTGGCACTATCCATCCTTTCACCACACTGTAAACGCTTAATACAAAAATGTATTTTTTTTTATGGAAGCTTTGAGTTGTAAAAAAGATACAACGCACAATTGCGGTGATTTGGTCTTGGCCTATATAAGAAGCTATTGATTTTTAAAATCGACTCACACTTTAGATCTTAAAAATAACTAACTAAAAGCTATAACTCATCGATAATAATTAAGA
RPS15	S_Cerevisiae	1.71469	0.024994	TTTGTATGATTGGTTCTGTTGTTGTGTATGAATTTCCAATGAGAAAAAAATCACTAAAATAATAGAAAAAGCTTTTGAATAAACGGAAGTAGAAATTACCAGAAGTAACAATTGAAAAACCTCGAATAATAACGGCTCTCCGCTACTAGGTTAACTAAACTTCAAGCGGGTATCAACGCTTTGGAGTTCCATGCAAAATGTTTCACGTTTCGCGCGTCTTCCGCATATCGTCCGGTATAGTCTCTCCCCTGGTATTCCCCTCGGCTGCCATGAGTTACAGCCTCAAAACAGGTACAAAACTTTTTTAATCCGTACACCGCGCGTATAAATCAATGTTATGTCTGGGCGTATAGTCCCGGAAACCGTGTTGGGCGGCAGTTCCGCCCAACACGGGCCTAG…	TTTGTATGATTGGTTCTGTTGTTGTGTATGAATTTCCAATGAGAAAAAAATCACTAAAATAATAGAAAAAGCTTTTGAATAAACGGAAGTAGAAATTACCAGAAGTAACAATTGAAAAACCTCGAATAATAACGGCTCTCCGCTACTAGGTTAACTAAACTTCAAGCGGGTATCAACGCTTTGGAGTTCCATGCAAAATGTTTCACGTTTCGCGCGTCTTCCGCATATCGTCCGGTATAGTCTCTCCCCTGGTATTCCCCTCGGCTGCCATGAGTTACAGCCTCAAAACAGGTACAAAACTTTTTTAATCCGTACACCGCGCGTATAAATCAATGTTATGTCTGGGCGTATAGTCCCGGAAACCGTGTTGGGCGGCAGTTCCGCCCAACACGGGCCTAG…
RPS15	S_Paradoxus	1.71924	0.0482906	TTTGTATAATTGGTTCTGTTGTTGTGTATGAATTTCCAATACGTCAAAAATCAGTATATTAACGAAAAATTTAAGAATAAAGCGAAAGTAGTAACTGCAAGAAGTAATAATTGAAAAACCTCGAATAATAACGGCTCTCCGCTACTAGGTTAGCTAAACTTCAAGCGGGTATCAATACCTTGGAGTTTCATACAAAACGTTTCACATTTCGCGCGTCCTCCGCATATGTCCCGGCGTAGTCTAGCCCCTAGTGTTCATAGGGGCTCCCATGGGATACCGCCCCCAGAGCGGGCACAAAACCTTTTTAAATCCGTACACCGCGCGTAAAAACTATAAGTGTGTCTGGGCGTACAGTCCTGGAAACTAATTTAAACGGCAGTTCCGCCCAGGGCGGCCTAG…	TTTGTATAATTGGTTCTGTTGTTGTGTATGAATTTCCAATACGTCAAAAATCAGTATATTAACGAAAAATTTAAGAATAAAGCGAAAGTAGTAACTGCAAGAAGTAATAATTGAAAAACCTCGAATAATAACGGCTCTCCGCTACTAGGTTAGCTAAACTTCAAGCGGGTATCAATACCTTGGAGTTTCATACAAAACGTTTCACATTTCGCGCGTCCTCCGCATATGTCCCGGCGTAGTCTAGCCCCTAGTGTTCATAGGGGCTCCCATGGGATACCGCCCCCAGAGCGGGCACAAAACCTTTTTAAATCCGTACACCGCGCGTAAAAACTATAAGTGTGTCTGGGCGTACAGTCCTGGAAACTAATTTAAACGGCAGTTCCGCCCAGGGCGGCCTAG…
RPS15	S_Mikatae	1.71698	0.0311047	TTTGTATAATTGGTTCTGTTGTTGTGTATAAATCTGAAATAATACAAAAGACACTAATCGTATGAAGAAAGAAAGCTTAGGATCAAAACGTATGTAGTAATTGCAAGAAGTGGTAATTGAAAAAAGCTCGAATAATAACGGCTCTTTGGTACTAGGTCAAGCAAACTTCAAGCGGGTATCGATATTCCAGTGTTCCATGCAAAAAAGTTTCATTTTCGCGCGTCTTTCGCATACGGCCCGGCATGGCCTACCGCCCAGAATCCCTGCTGGCTCCTGTCAGTGGTCTGCCATATCACAGGTACAAATGCCCATTAAATCGGTACACCGCGTTTAAAGGATTGAGTTGTGTATGGGTGTATAGTCATGTAAATGACTCCAGACGACGCGTCCGCCTAGGGC…	TTTGTATAATTGGTTCTGTTGTTGTGTATAAATCTGAAATAATACAAAAGACACTAAACGTATGAAGAAAGAAAGCTTAGGATCAAAACGTATGTAGTAATTGCAAGAAGTGGTAATTGAAAAAAGCTCGAATAATAACGGCTCTTTGGTACTAGGTCAAGCAAACTTCAAGCGGGTATCGATATTCCAGTGTTCCATGCAAAAAAGTTTCATTTTCGCGCGTCTTTCGCATACGGCCCGGCATGGCCTACCGCCCAGAATCCCTGCTGGCTCCTGTCAGTGGTCTGCCATATCACAGGTACAAATGCCCATTAAATCGGTACACCGCGTTTAAAGGATTGAGTTGTGTATGGGTGTATAGTCATGTAAATGACTCCAGACGACGCGTCCGCCTAGGGC…
RPS15	S_Bayanus	1.12497	0.0151549	TTTGTATAATTGGTTCTGTTGTTGTGTATAAACCTCCAAATAAAACCCAAAAAACCGAACTGATAAACCCGAAATACAAATTGAATTAGCAACTCCAAAACTAATAACTATAAAACCTCGGATCCTCACTACTAGGTTAACCAAACTTCAAGCGGGTACTAACAACTCACTGTGCCGTGCAAAAAATGTTGCAAGCTTAGCGCGTCTCGCTTTAGCAGTCCAGCCCAGTTAGCCCCCGCAGCTTTCCCACTAGCTCCGGCGGATTAGTGGCAACTTTCCGAGTTTTCCATGCGGTTCGGCACCTTTACATCCGTACACCGCGCGTATACAGCAGAAGGTTGTGTATGGGCGTACAGTCCTTGGAATGTCTTTTCGCGGGTCCGCCTAGAGCGAGCCTGG…	TTTGTATAATTGGTTCTGTTGTTGTGTATAAACCTCCAAATAAAACCCAAAAAACCGAACTGATAAACCCGAAATACAAATTGAATTAGCAACTCCAAAACTAATAACTATAAAACCTCGGATCCTCACTACTAGGTTAACCAAACTTCAAGCGGGTACTAACAACTCACTGTGCCGTGCAAAAAATGTTGCAAGCTTAGCGCGTCTCGCTTTAGCAGTCCAGCCCAGTTAGCCCCCGCAGCTTTCCCACTAGCTCCGGCGGATTAGTGGCAACTTTCCGAGTTTTCCATGCGGTTCGGCACCTTTACATCCGTACACCGCGCGTATACAGCAGAAGGTTGTGTATGGGCGTACAGTCCTTGGAATGTCTTTTCGCGGGTCCGCCTAGAGCGAGCCTGG…
RPS15	S_Kluyveri	0.938303	0.0119887	TTTTTGTTTATATTGGTTATCTGAGACGTAACTTAATCTAGAATATCAGAAATCGTTAATTAGTACATTGTTGAACCTTTTGCCAATCTTTGTCGACCAACTGGATGGCAAGCAGAGAGCGCGAGCGAGAGACTGGTACCTCCTCCTCCCGTCGCAACGCGGCATTGACAGCAAACCGACCGCATTTGGTTCGGTATCTACAGCATTCTTCTTGGACCGTCTATTTTTTTCACTTTTTTTTTTCAGTCTAACAACCCATTCCTCTGGCTATTTTTCCTAGATAGATTCGCAGATCTTTGTATGTTAGTGTGTGGGTCTAAAAAGCAGTCTCGTGTTGTGTGGGTGTTTGGTTGACCAGACTGAAAAATAACCCAGCTGTGCCTCCCAGAAGGGGCAAGG…	-
RPS15	K_Lactis	0.819684	0.0113819	CGTTCAATATTTGTCGAGGTTTCTGGGGAGAATTACGTGAACTATACCAAGAATTAAACAGTATTATGCCTTTAACAATTAAAATATAAAGGCACTTAAACCTTAAACGTGTATTGTAAACCTCTAATCAATTGACAAAAATGTTGAAGATTCGTCAAGGTAGAGAGAATTACCGGGCGCCATTGGAAAGCGTTGAAGCTTTCCACTGTGAGAGTACTAACTCTCGCACTGATTCCATCGAATTGCAGATTGGGAACCAGATTCCTCGATTTTCCAGTGCTAAAGAAAATCAGTGGAATTGGTCGCCTAGATGTTTTCCTTTTTCGGACGAAAAACTTAAAAGATATGGATGGTAAGAAAACAACAAAGTGCGGTGTACATATAGTAATAGGATTTAAA…	-
RPS16	S_Kluyveri	1.04897	0.04059	GACAGAGAGAGGAGCCCGATGGAGCTGCCACAGATTCTGTGGCCGCGTAGTCCACGACTCCTCGTGGACAGTCCCAGGGCAGAGTGGGCCTACCTGGAGGCAGCTGGTAGGACTGTGTAGGCAGACCACCAGTAGCGCCAGGCCAGACACTGTGCTACGTAGTGGCCCTGGGCAGCAGTCGGTGGAGTGGGGGGGACTGAGGACTTGCTACGCTGAGGCGATGGTAGAGTGTCGCGAGACGTCTGCCGCCGCTCCAGCGACTCGCAATCGAAGCGAGAGGTGGGAGAGGCGACTACGACGGCCGCTAAATGAGATGGTTCTGATGCGAGCTCCTATAGAATAAAAAAATTGATGCGCAAAGCTTACTCTTCATAGTGAGATGTTTGGGTCTAAATCAAG…	-
RPS16	K_Lactis	1.15985	0.0314384	AGGAAATTGAAGCCAAACAGAACAGAAACAATTCCCAGTACCGCGAGGCGGGATGGAATGTTGAGACAGCCCCGTACTAAGGGAACAGGATCTTGCGCAGTACAAGGTACGGTGTTGGAGAGACTGGAGCTAGTGCAAGCTAGGCTACTGCTTCCAACCCAGCCTAGGCAAGAAGGTGTCGAGTGGTGGGGAGAAGGGAGAAGAGCGGACAATGTGGCGGGAAGCGTTTCTGCCTGGGACTAGGGAGGATACGCCCGTGACAATAGACTCCTCGATGCGAAACTCTTTTCCTTTTGTTGGATGAGGATCAGATATTTCCTGTTTAGGAAGTAGATATAAAAGTTGAACATAAATAGACCGTGGTGCACAGATGCAACAGTCTCGGTTAATATCGGGACT…	-
RPS16A	S_Cerevisiae	1.67501	0.0732711	ACTTGATTCCTGCTTTACTTTTCCGAAATTATTTCCTATTAATGTTACATTATGTTCTAACTTCAAGTACCTCTAATTACATAGTATGTAAGAAAGTAACTTCCCAATGGAGGATGGTGAGCACCGGCTCCGAGTAGGTTAGTAATGTGTCCTTGCAATGCCGCGTCAGCCTGAGGAGAGCGTACCAAGAAGTCGAATGACCCCACTAGAGATTCCTCTAGCGAGGCCAGTGGATGAGATGGAAGCCTACGCAAGGCAAAAGATTACACTCGCGAACGTGCGTCCGGGATGATACAGTATTTTTTTAAAAACTATAAATGTATGGGTGCGTAATGTACAGATTTTATGGCACTGAAAATCTTTTTCAAGATAATCTCACCGTATTACTTAAACATCAGT…	ACTTGATTCCTGCTTTACTTTTCCGAAATTATTTCCTATTAATGTTACATTATGTTCTAACTTCAAGTACCTCTAATTACATAGTATGTAAGAAAGTAACTTCCCAATGGAGGATGGTGAGCACCGGCTCCGAGTAGGTTAGTAATGTGTCCTTGCAATGCCGCGTCAGCCTGAGGAGAGCGTACCAAGAAGTCGAATGACCCCACTAGAGATTCCTCTAGCGAGGCCAGTGGATGAGATGGAAGCCTACGCAAGGCAAAAGATTACACTCGCGAACGTGCGTCCGGGATGATACAGTATTTTTTTAAAAACTATAAATGTATGGGTGCGTAATGTACAGATTTTATGGCACTGAAAATCTTTTTCAAGATAATCTCACCGTATTACTTAAACATCAGT…
RPS16A	S_Paradoxus	1.73673	0.0367229	ACTTGATTCCTGCTTTACTTGTCCGAAATTATTTGAGTAAATGTTACACTTAGTTTCAACTTCAAGTACCTCTAATTACATAGTATGCAAGAAAGTAGCTTCCCAATAGAGAATGGTGGTGGGCACCGGCTCCGAGTAGGTTGGCAATCTGACATAGCTCTGCCGCGGTTGCCCGAGGAAGGCCTCCCAAGAAGTCGAATGAGCTCGTCAGGGAATTCCTCTAGCGAGGCCAGTGGGCGAAGCTGAAGCCTACGGAAGGCTAGTCATTGTACTCGAAGGCGCTCAGTCCGAGAGGACAATATTTTTCTTTCAATATTCATAAGAGTTATGGGTTTATAATGTACAGATGTTAAGGGTGAAAAACACCTTTAAAAAATTTCACAAAAAGAATAAACATCG…	ACTTGATTCCTGCTTTACTTGTCCGAAATTATTTGAGTAAATGTTACACTTAGTTTCAACTTCAAGTACCTCTAATTACATAGTATGCAAGAAAGTAGCTTCCCAATAGAGAATGGTGGTGGGCACCGGCTCCGAGTAGGTTGGCAATCTGACATAGCTCTGCCGCGGTTGCCCGAGGAAGGCCTCCCAAGAAGTCGAATGAGCTCGTCAGGGAATTCCTCTAGCGAGGCCAGTGGGCGAAGCTGAAGCCTACGGAAGGCTAGTCATTGTACTCGAAGGCGCTCAGTCCGAGAGGACAATATTTTTCTTTCAATATTCATAAGAGTTATGGGTTTATAATGTACAGATGTTAAGGGTGAAAAACACCTTTAAAAAATTTCACAAAAAGAATAAACATCG…
RPS16A	S_Mikatae	1.59558	0.0598202	ACTTGATTCCTGCTTTACTTTTCCGAAATTATTTTGTATTACTATTACACTTGGTTTCAACTTCAAGTACCTCTAATTACATAGTGAGCAAGAAAGTAACTTCCCAATGGGGGGTAGTGACAAAGGCTCACAGTAGGCAGGTCCTCTAACTCAGAGATGCCGCGTTTGACCCGGAGGCGCCTACCAAGAAGTCGAATGCGTCTTGCAGAGAATCTTTCAAGCGAGGCCAGTAAGTTGAGCCAAAGCTCACGGAGTATCAAATTTTGCCCAATAATCCCGAAATGATTCCCGAAACGATTTTGTTATCCACAGAGAAGAGTTATGGGTTTATGATGTACAGATGTTTTTAGTCTGAAAATTACTAGCGGAAATACAGCTCTCAAACAGACAACATCGGTA…	ACTTGATTCCTGCTTTACTTTTCCGAAATTATTTTGTATTACTATTACACTTGGTTTCAACTTCAAGTACCTCTAATTACATAGTGAGCAAGAAAGTAACTTCCCAATGGGGGGTAGTGACAAAGGCTCACAGTAGGCAGGTCCTCTAACTCAGAGATGCCGCGTTTGACCCGGAGGCGCCTACCAAGAAGTCGAATGCGTCTTGCAGAGAATCTTTCAAGCGAGGCCAGTAAGTTGAGCCAAAGCTCACGGAGTATCAAATTTTGCCCAATAATCCCGAAATGATTCCCGAAACGATTTTGTTATCCACAGAGAAGAGTTATGGGTTTATGATGTACAGATGTTTTTAGTCTGAAAATTACTAGCGGAAATACAGCTCTCAAACAGACAACATCGGTA…
RPS16A	S_Bayanus	1.59596	0.0521846	ACTTGATTTCTGCTTTAGTTGTCCGAATTTATTTTGAGTTATAGGTAATAATGAGTCTCAACTTCAAGTACCTCTAATTACATAGTAAGCAAGAAAGGAACTTCCCAATGGGCGGCCAACCGTGGCTAGCAGTAGGTAGGTAATCCTGTCCAGCGATGCCGGGTTTGACCGGAAAGAGTCTACCTGGGACTCCATGAGCCAGGTAGAAAGTCCCTCCAGTGAGGTTGGATGGATGTAACAATAGAGCGAGCTAGACGGAGCATCATTTTCTGAAAAGTATAGGCTCAAATAATTAATGAACGTAACTTGGTGGAAAACAAATGGGCATCACAAGTTATGGGTTTTAGTGTACGGATGTTATAGGCCTGAAAAGAAAGGGACTTTAAATGCCGACGGTGT…	ACTTGATTTCTGCTTTAGTTGTCCGAATTTATTTTGAGTTATAGGTAATAATGAGTCTCAACTTCAAGTACCTCTAATTACATAGTAAGCAAGAAAGGAACTTCCCAATGGGCGGCCAACCGTGGCTAGCAGTAGGTAGGTAATCCTGTCCAGCGATGCCGGGTTTGACCGGAAAGAGTCTACCTGGGACTCCATGAGCCAGGTAGAAAGTCCCTCCAGTGAGGTTGGATGGATGTAACAATAGAGCGAGCTAGACGGAGCATCATTTTCTGAAAAGTATAGGCTCAAATAATTAATGAACGTAACTTGGTGGAAAACAAATGGGCATCACAAGTTATGGGTTTTAGTGTACGGATGTTATAGGCCTGAAAAGAAAGGGACTTTAAATGCCGACGGTGT…
RPS16B	S_Cerevisiae	1.59675	0.0468956	TGTGTACGATTCCTGCTGTGCTGTACTATGCTTTTCTCAAACCCCTTCGAACAGAATGCTGCAAGCTTAAATGGATTAGTAGCTAATATCCGATCATTTCAAATTTTCCAAGATTTCCACACCTCTACTGTGATTATTCCGACTAGAAAAAAATTAAATTTTCTAACTACAAAAAATTGCCTGCATATATGTAAGGATGTAACAGGAAATGTATGGGTCACATATTAATAGCTTGTTTTACTCCATAAAAGAGTCTGATATTCAGAAAAAACACCCATACATGTTGAAAAATAATGCATTGTGAAAAAAAGTGGTTGAAAAATGTATGCGATCTAGGAAAAACTGAATTTTCCTTAGGTTGTCGCTCCTCCTCTAGAAGGATGCTGTGGCCTTTGACCT…	TGTGTACGATTCCTGCTGTGCTGTACTATGCTTTTCTCAAACCCCTTCGAACAGAATGCTGCAAGCTTAAATGGATTAGTAGCTAATATCCGATCATTTCAAATTTTCCAAGATTTCCACACCTCTACTGTGATTATTCCGACTAGAAAAAAATTAAATTTTCTAACTACAAAAAATTGCCTGCATATATGTAAGGATGTAACAGGAAATGTATGGGTCACATATTAATAGCTTGTTTTACTCCATAAAAGAGTCTGATATTCAGAAAAAACACCCATACATGTTGAAAAATAATGCATTGTGAAAAAAAGTGGTTGAAAAATGTATGCGATCTAGGAAAAACTGAATTTTCCTTAGGTTGTCGCTCCTCCTCTAGAAGGATGCTGTGGCCTTTGACCT…
RPS16B	S_Paradoxus	1.57541	0.0336238	TGTGTACGATTCCTGCTGTGCTGTGCTGTGCTTTTCTCAAACCCCTCTTAATAAAATGCTGCAAGCTTGAATGGTTAATAGCTAATATCTAACCATTTCAAATTTTCCAGGATTTCCACACGCCTGCTATGATTATCCCGATCAGAAAAAATTTCATATTTTAATGAAAAAAATACTGCCTATTTCATATGTAAGGATGTGGAATGAAATGTGTGGGTGAAACATTAACAGCGTGTCATCCCGGTGAAGGATAGCCAGTTATTGAGAGAACACCCATACATGCTAAAATAATGCTCTATGAAAAAAAAAAACGCTTGAAAAAGTACATACGATCTAAAAAAAGTTGAATTTTCCTTAGATTACCGCCTCCCCTCTAGAATGAGAGTATGGCTCATTTTC…	TGTGTACGATTCCTGCTGTGCTGTGCTGTGCTTTTCTCAAACCCCTCTTAATAAAATGCTGCAAGCTTGAATGGTTAATAGCTAATATCTAACCATTTCAAATTTTCCAGGATTTCCACACGCCTGCTATGATTATCCCGATCAGAAAAAATTTCATATTTTAATGAAAAAAATACTGCCTATTTCATATGTAAGGATGTGGAATGAAATGTGTGGGTGAAACATTAACAGCGTGTCATCCCGGTGAAGGATAGCCAGTTATTGAGAGAACACCCATACATGCTAAAATAATGCTCTATGAAAAAAAAAAACGCTTGAAAAAGTACATACGATCTAAAAAAAGTTGAATTTTCTTTAGATTACCGCCTCCCCTCTAGAATGAGAGTATGGCTCATTTTC…
RPS16B	S_Mikatae	1.32948	0.0504559	TGTGTACGATTCCTGCTGTGCTGTGCTGTGCTTTTTTCAGGGCCTTTGCAAGAAAATCCTGCAAGCTGAACTGATAATAGCTATTATTCCACTATTTCAAAGTTTTCAAGATTTCCAAACGTTTGTTGTGATTATTCCGAACAAAAAATGAAAATTTGTCATGAAAAAAATTGCCTGTGCGAATGTAAGGATGCGAGATCAAATGATTGGGTGTACAACGGATATCATGTTTTCTCTGCTTAAAGATTATCAAGTATTCTAAAAACACCCATACATGTAATAAATACTGTACTGCGTAAAAAAAATGTTCAAGAAAATGCTTGCATACCAAGGAGCAGTTAAGTTTTCCAGGCGGCTTCTTTCCCTCTAGGACGTCGCCTTTTCGTAGGCGAAGCTTAC…	TGTGTACGATTCCTGCTGTGCTGTGCTGTGCTTTTTTCAGGGCCTTTGCAAGAAAATCCTGCAAGCTGAACTGATAATAGCTATTATTCCACTATTTCAAAGTTTTCAAGATCTCCAAACGTTTGTTGTGATTATTCCGAACAAAAAATGAAAATTTGTCATGAAAAAAATTGCCTGTGCGAATGTAAGGATGCGAGATCAAATGATTGGGTGTACAACGGATATCATGTTTTCTCTGCTTAAAGACTATCAAGTATTCTAAAAACACCCATACATGTAATAAATACTGTACTACGAAAAAAAAATGTTCAAGAAAATGCTTGCATACCAAGGAGCAGTTAAGTTTTCCAGGCGGCTTCTTTCCCTCTAGGACGTCGCCTTTTCGTAGGCGAAGCTTAC…
RPS16B	S_Bayanus	1.37209	0.0800626	TGTGTATGATTTCTGATGTGCTGTGTTGAGATCAAGGCTACTTCAAAAGACGCTGCAAGCTATTATTCTTAATAGCCAATATCTATAGCTATTTCAAATTTTCCAACATTTCCGCACGTCTGTTGTGATTATTCCGACCAAAAAAATTAGAAAATTTCTGATCGGAAAAATTGCCCGCATTAAATGTAAGGGCGTAACATAAAATGTATGGGTCAAAGAAGAATTAGCTCGCTTTTCACACTATAAGCTGCACTGGCTTTTTTGAAACACCCATACAAACAACAGTTTTATACCGAATAAAAATATTATATTGAAAAAATTCACTTCGACTGAGAAAAGTTGAGTTTTTCAGGGGAGCGGCTTGCTCCGTAGAAGGAGAATATCGTCTCTTTCCGAGGC…	TGTGTATGATTTCTGATGTGCTGTGTTGAGATCAAGGCTACTTCAAAAGACGCTGCAAGCTATTATTCTTAATAGCCAATATCTATAGCTATTTCAAATTTTCCAACATTTCCGCACGTCTGTTGTGATTATTCCGACCAAAAAAATTAGAAAATTTCTGATCGGAAAAATTGCCCGCATTAAATGTAAGGGCGTAACATAAAATGTATGGGTCAAAGAAGAATTAGCTCGCTTTTCACACTATAAGCTGCACTGGCTTTTTTGAAACACCCATACAAACAACAGTTTTATACCGAATAAAAATATTATATTGAAAAAATTCACTTCGACTGAGAAAAGTTGAGTTTTTCAGGGGAGCGGCTTGCTCCGTAGAAGGAGAATATCGTCTCTTTCCGAGGC…
RPS17	S_Kluyveri	1.6103	0.021521	TGCCTTTGATTTGTCGTTTTTTTGGGAATAATTTGTTCGTATTTGAAATGTTCATGCCTTTTTCCAAGTTCATGAAGGATAAACTCAATAGATTTTCGTGTTCGATGATGTAGAGATGTGACTGTTTATGTTTCCAACCCACACATATTATATTCTACTCAACCCATACACTGAGATAAAGTAAAGAAGTATTTTTCGGTTCACAAACGTTTCACTATTTTTCATTTTGCCGAGGACTCTAAAGTCTCGGCCCACGATTCCTTCCAATCCCTGACGAGAGTAGCACGCCCAGTACCGCACCTACCCTGTCGCTATCCCTCCGGGACTGGAGCTACGCTACCCTCTCCACGACCCAACCTGGGCGAGTCTCTGCGTAGGCCGCGAGGAGTCTGCCCAGCC…	-
RPS17	K_Lactis	1.3506	0.0156475	GGTGACGGTTGAACAAGGAGAAGCAGTTCAAAGTCAAACAGATGTAAAGCTAAATCACTATAACAGTTTGCGGGTCCTCGAAGTTAGTTATCTTTTTATATCAATGAGTTTGACTTATTCTTTAAACTCTCTTGAAATCACTTGTTGATTCTTTAGAACATCATAATTGAACTTTCCATGTAAACAGGAGAACAGAATGCGGGACTGTTACATCCTTACATTCTTATTAAGGATGAAAAATCTGAAAATCCTGAAATTCGAGAACGCTAATTTCATAAAATTTGATAAAACCAAAAGAGGAAATACTACTTGGCACTTCGTAAGAGAATTGGGACGGAGGGGAAAGGTGTGTGGACTGGTACTGGAAGACAGAATGTCTGTCTAGCTTGCTGTCATCCA…	-
RPS17B	S_Cerevisiae	1.4884	0.039292	ACGCTGATATTTTATCGAAAATGGAGGGTGATTAGAGAAAAATTATTTTTATCATTAACCTAAACATCGAACTCTGGCATGTACTTTCCCAATCGTGTTGATTTTCACTTATTTGTTTGGAACGTCTGGAATTTTCTACATATATAAAGCTCCCTGTAACATCCATACATTCGGTTAAAATTACACCCATACATTTATAGTATTTTTTCCATCGTTAGTTTTTCGTATTATGGGCATTCCGAAGAATTTCATCTGGAAGACGCGCATTGATTGATATCGTTTTCTCAGAGGTCGTACCGTTTCGAGATGAGGGAGAAGGTTCAGGCATCGAGGTCTACCGGAGCAAGGCCAGTCCTTCCTCCCGTTAGTACCTCTGTTAAGGGTAAATTTCAAGTAAAC…	ACGCTGATATTTTATCGAAAATGGAGGGTGATTAGAGAAAAATTATTTTTATCATTAACCTAAACATCGAACTCTGGCATGTACTTTCCCAATCGTGTTGATTTTCACTTATTTGTTTGGAACGTCTGGAATTTTCTACATATATAAAGCTCCCTGTAACATCCATACATTCGGTTAAAATTACACCCATACATTTATAGTATTTTTTCCATCGTTAGTTTTTCGTATTATGGGCATTCCGAAGAATTTCATCTGGAAGACGCGCATTGATTGATATCGTTTTCTCAGAGGTCGTACCGTTTCGAGATGAGGGAGAAGGTTCAGGCATCGAGGTCTACCGGAGCAAGGCCAGTCCTTCCTCCCGTTAGTACCTCTGTTAAGGGTAAATTTCAAGTAAAC…
RPS18	S_Kluyveri	1.40326	0.0264338	TCATGTCCATAGGTATACTTACACGTATACGTATATATCAACTCCCTCTGTATATAATAACTTTTTGAAACCAAAACGAGGATTTCCCAAATCGAACTAGATCTTCAAGTTTATATCCAAGGGACTGCAAAGAAAAGATGTATGTACGTACTTTTTCCAGCCAGCCGGTGGTGTGTGAAAAAGATGCTTCACTTGTTTATAATATGTATTGTACGATTCGTTATCTGAAATAGTTCCGATGATGTAATCATTCATTTTCACCACTTCGTTGTGACTCACGACTGTCTACACCCATACAATTTATAATACTGTAATAAGACCCATGCATTATATAAATGTGTAGTTTCTGCTCAGACAAACGAAGGATGAAAATGGAAAAGAGTATCCGTAGGTACGATG…	-
RPS18	K_Lactis	1.12359	0.0454155	TTATGGAACGAGATACTGATCATCAGACGGGAGTTAAAATAAAAGCTTCGAATAATAAACTCCACATTGCACCAACTCATCCACAACTTGTATATATATGTATGTGTGTATATTAACGTCACAAATAAAATGAAAATAGCTACACGGCTGTTTATCTAAGTTAGCGACATCCGTATTTGTAAAGACAATTGACCAATGCTGTGGCCATCATCAAGCTGTAAAATCCAAATCGAGGACAAACAGACGCAACCATTTCGGACTGTTGTCGGAAGCCTTATACACCCGTGCATTTTATTATTTTCAATGCGCCTATAACCGAATAATAGTTTAATTTTTCCTTTCCTTCAAGTTTCCTGATTAGGAAACCCATCCAACGTTTTTCAGACTTTGGGCTGAGTT…	-
RPS18A	S_Cerevisiae	1.35043	0.0394054	TCGGTGATGTGTGTATCTCTGGTCAATTTCACAATGTTATGCCCTTAGATATGTGTTTATTCACGTTCACTGTGTGTTCCTGATATTTAGCTCATCGCCCAGATCTTTCTAAAAAATTTTCAAGAGAATACCCGGATGAAAAAGCGTGTTCGGATTCCCATCACTTAATGAAGCTTATATCTGACAGCGCAGGAAAAGCACAAAATAGAACCTAGCCACTTCGCGTAAAAGCTCATAATGTTAACGATATAGTAATATTTTGACGCATCGAACTTTATCACCCGCAGCATAAAGTACTGATACTACAAGTTTTTTTCGTTATTCTTACCGGTATTGCGCTAAAGCAGTTTTGCACCTGAAAACAAGTAAAAATAGGACTTGAAAAAATTAAATAGCATA…	TCGGTGATGTGTGTATCTCTGGTCAATTTCACAATGTTATGCCCTTAGATATGTGTTTATTCACGTTCACTGTGTGTTCCTGATATTTAGCTCATCGCCCAGATCTTTCTAAAAAATTTTCAAGAGAATACCCGGATGAAAAAGCGTGTTCGGATTCCCATCACTTAATGAAGCTTATATCTGACAGCGCAGGAAAAGCACAAAATAGAACCTAGCCACTTCGCGTAAAAGCTCATAATGTTAACGATATAGTAATATTTTGACGCATCGAACTTTATCACCCGCAGCATAAAGTACTGATACTACAAGTTTTTTTCGTTATTCTTACCGGTATTGCGCTAAAGCAGTTTTGCACCTGAAAACAAGTAAAAATAGGACTTGAAAAAATTAAATAGCATA…
RPS18A	S_Paradoxus	1.19468	0.0216038	GCGGTGATGTATATCTCTCTGGTCAATTCACAGTGTTGTGTCCTTAGCTATGTGTGTATTCACATTCACCGTATTCTTTTAATATTTAGCTCATCGCCCAAATCCTCGCTTGAAAATTTTTCAAAACATACCCGGATGGAAATGATTAGGATTCCCGTACTCGATGTGGCTTATGTTTTGGCAGCGCAGCAAAAGCACGAAAATAAAACTTAGCCATTCGGCGTATAATTTCATCATGTTGACGATACGGTAATATTTTAATGCCATTGAAGTTTCTATACTGTGACATATCGTACTAGTATTACATGATCTTTCTTATCTTCTTACCAGCACTACGCTCAAGCAGCTACATTTGAACACAAGTTAGAGAGGATTTGAAATTAAATACATATAACACAC…	GCGGTGATGTATATCTCTCTGGTCAATTCACAGTGTTGTGTCCTTAGCTATGTGTGTATTCACATTCACCGTATTCTTTTAATATTTAGCTCATCGCCCAAATCCTCGCTTGAAAATTTTTCAAAACATACCCGGATGGAAATGATTAGGATTCCCGTACTCGATGTGGCTTATGTTTTGGCAGCGCAGCAAAAGCACGAAAATAAAACTTAGCCATTCGGCGTATAATTTCATCATGTTGACGATACGGTAATATTTTAATGCCATTGAAGTTTCTATACTGTGACATATCGTACTAGTATTACATGATCTTTCTTATCTTCTTACCAGCACTACGCTCAAGCAGCTACATTTGAACACAAGTTAGAGAGGATTTGAAATTAAATACATATAACACAC…
RPS18A	S_Mikatae	1.35555	0.0305987	ACCGTAATATATTTCTTATTCGTCCAGTTACAATCTTGTCGTCTTAGATACGTTTGTATTCATGTTCAATATGCCCTTTCGATATGCTAGCTCATCGCCCAGATCTTTCTCTTGAAAAATTTTCAATAATACCCGGACGGAATAACATGTCCAGATTCGCATCATTATTCATCAAGTAAAAAAAAAGGTATAATTTCGATACTTACGATACATACTTCATGAAGATCACAATAATAACATGCTATGAAATGAACCCCCTATATATTAACAGTTCACGCAACTATATGAAGGCATTTTTTTATTTACTTAGCAATACAACGCTCGATCTAGCTCTGTAATTAGACAATTAGACACGAACTAAAGAGAGATTGAACATAAGATAATAATGTATATAGACAT…	ACCGTAATATATTTCTTATTCGTCCAGTTACAATCTTGTCGTCTTAGATACGTTTGTATTCATGTTCAATATGCCCTTTCAATATGCTAGCTCATCGCCCAGATCTTTCTCTTGAAAAATTTTCAATAATACCCGGACGGAATAACATGTCCAGATTCGCATCATTATTCATCAAGTAAAAAAAAAGGTATAATTTCGATACTTACGATACATACTTCATGAAGATCACAATAATAACATGCTATGAAATGAACCCCCTATATATTAACAGTTCACGCAACTATATGAAGGCATTTTTTTATTTACTTAGCAATACAACGCTCGATCTAGCTCTGTAATTAGACAATTAGACACGAACTAAAGAGAGATTGAACATAAGATAATAATGTATATAGACAT…
RPS18A	S_Bayanus	1.31542	0.0178307	TTTTTGGTTTGTTTTCCTATAGGTTCAACTGCCGATATTGGCCACTTAGATGTGCCATATACTCTTATTCATAGCGATCTTAATTTTTAGCTCATCGCCCAAATCTTTCTCGAAAATTTTCAAGGATACCCGGACATGAAACGCGCGGATTTCCCACTATTACCAGTAAACTCATCAAGAGTATGCATGGCAAAACCAGAAACGTGGATCTAGCTTTTTCAACCATTATATTCTGCTATGTACAGAATCAAACAGCTCTCCAATGAATGAAAGCTTCTCAGGGTTTAGCGCAAAGTCTTCATAAAACTTGCGAAAATGTCAAACTATTTCATCCTTTTACCAATAGCAATGCTACCTTGAACTTGTGCCTGTATATGTGTACAGAAACTCTTCTAAATC…	TTTTTGGTTTGTTTTCCTATAGGTTCAACTGCCGATATTGGCCACTTAGATGTGCCATATACTCTTATTCATAGCGATCTTAATTTTTAGCTCATCGCCCAAATCTTTCTCGAAAATTTTCAAGGATACCCGGACATGAAACGCGCGGATTTCCCACTATTACCAGTAAACTCATCAAGAGTATGCATGGCAAAACCAGAAACGTGGATCTAGCTTTTTCAACCATTATATTCTGCTATGTACAGAATCAAACAGCTCTCCAATGAATGAAAGCTTCTCAGGGTTTAGCGCAAAGTCTTCATAAAACTTGCGAAAATGTCAAACTATTTCATCCTTTTACCAATAGCAATGCTACCTTGAACTTGTGCCTGTATATGTGTACAGAAACTCTTCTAAATC…
RPS18B	S_Cerevisiae	1.48193	0.030625	TGTACACATACAAGTGACCCCTTCTTCTACCCCATCCAGTTATTATTCCATCTACATATTTAAAAAATAATCTGTAAATAATAAGCCCATGAAATATCAATCTCACAATGAAAGAATTGTATAATTCAGAATGATTTGACGTAAAAGCAAGTCTCATTCAAGAAACTGTAAAATCCGTACACACTACTGAATTTTACATCCATACATTTTTTTGAAATTTCATGTTTTTTTGAAAAATTGGAAAAGGGCTAAATTATCCGTCGGGGTGTCCTCCTAGCTCGGCTCAACCTAGGCAAATGCGTTTACTGGGGCCATCCAAGCTCATCCTTCCAGAGATTCGCCTTTCAGAGGCAAAGAACTCGTCTCCGCAGGCCTCTTGTTCCGGGAGGAGGAGAATTC…	TGTACACATACAAGTGACCCCTTCTTCTACCCCATCCAGTTATTATTCCATCTACATATTTAAAAAATAATCTGTAAATAATAAGCCCATGAAATATCAATCTCACAATGAAAGAATTGTATAATTCAGAATGATTTGACGTAAAAGCAAGTCTCATTCAAGAAACTGTAAAATCCGTACACACTACTGAATTTTACATCCATACATTTTTTTGAAATTTCATGTTTTTTTGAAAAATTGGAAAAGGGCTAAATTATCCGTCGGGGTGTCCTCCTAGCTCGGCTCAACCTAGGCAAATGCGTTTACTGGGGCCATCCAAGCTCATCCTTCCAGAGATTCGCCTTTCAGAGGCAAAGAACTCGTCTCCGCAGGCCTCTTGTTCCGGGAGGAGGAGAATTC…
RPS18B	S_Paradoxus	1.48998	0.016644	TGTATAAATACAAGTGCCCCTTTCAGCTTACCCCATCCAGTTACTATTCCATTTACATACGAAAAAATAAATCTGTAAATAACATGCCCATAAGATACCAATCTTACTGTGTAAGGGTTATACAATTCGCAATGGTTTGACGTAAAATAAATCCCATTCAAAAATGTAAAATCCGTACAATTCATTGCTCATTACATCCATACACCTTTTGAAAGTTTATGTTTTTTCAAACTATTGGAAATAGGGCTAAATTATCCGTCGGGATGTCTCCTAGCTCGGCTCAATCTGAGCTGTCCCCACGGTGCGCCCACTGAGGTCTCCCAAGCCCATCCTTTCAGCGGTTGTCCTTGCACAGGTGAGGCCTCCTCTCCGCAGGCCCCTGTTCCAGGAAGGAGGATG…	-
RPS18B	S_Mikatae	1.62393	0.0503171	CATATAGGTACAAGTGCCATCCTTCTAGCTTACTCCACTCAGTAATTGTTCAACTACATACTAAAAAAGAAATCTGTAAATAATAAAGCAATGAAACCTTAATCATACTTAATTTGCAAGTTTTATCTAATTTTGAATAGCTGCGGCCATAAATGTAATTGTGACGTAAAAAAAGATGGGAGCTTTTTCACAGTCATAACATCTGTACATTCTGTATAGATGTTACACCTATACATCTTTATAGTTTTTAAAATTTTCAACGGATAAAAGTGCGCTGAAACTACTCAACGTGATGACCTCTCGCTCGGCACCACACAATCCCTCTCGGCTACACTCCTACGGAAAAAGGGCCGAGCCCGTTCTTCAGGAGTTTTGTCTCTCACAGGCTAGACGCCCCTT…	-
RPS18B	S_Bayanus	1.7102	0.0492848	GCGAGCTTATTGAAAGAGTATGCCTCTCCATGTTTGGCACGGTCAAGTTTAGAAGGATAGTGAGTACGGTTTTTGATTTGTTAAATCCGTACAGCGTCCGTAACCATAACACCCATGCATGTTCAAAATATATTTGCGTTTTTTTTTATTTCATCAAAGCTGCCGCAAAGCATTTCAATTGTCGTGGTTTCCGGGCCGGGCTCCGCCTAAAATCTCCCACTAGTGAGCCTACGGGAACGGTGCCCTCCCATGAGCTACCTCTTGCCCAGACGAAACCTCCCTCTCTGTGCTCTCTAGTTCTGGAAGGAGAACTCTTCTTTCCCCCGCGACCAGCTAATGCCTAGGCTAGAGCGATTCCTGGAGCTTTGGCTATACTAACTGGAAAAGTCCTTAGTAATA…	-
RPS19	S_Kluyveri	1.20808	0.0224144	ATTAAGTCATAAGCTCATTTTAGTTTATTATCTTTTTCATTTTACACTTTGTCATCTTCAGAGATTCTTTAGACACCATCTGGTCATATTTGCTGTATACTCTATAGTGATAATAAGACATTTGGGCATTTTTAAATGGTTTTTCCTACACCTATGTATAATAGAATAAACGTTATCAAGGATTGAGATAGGTGGCGAGGTCTGGACGGGAAACCCTCCAGGACTCGTGCTTAAAATAAACCGTCCCATGGATAACTTTAACCTGTCTATCTACAACGTTGTAATTAGATAGCACTGTAGATGTAATCCAATCTTAACATTATTTTTCTCTACTCTTGCATGCCATTGGCAGCTCTGCTGAATCCTTGCCATATAATTGATAAGCTTCTTGGTTGACCA…	-
RPS19	K_Lactis	0.983884	0.0133524	GCAAATCCGGAAATATGATTTCATATTAATTTTTCCTTTCTGTTTACTCGCATCTTGCATCCTCTTGCTTTCGAGGCAAAGGCTCTATTTCGTATTCTATAGCTAGCTTATTATTCCATAATAAAAAGATTGTTATAATACAAGATGGCCATTACCTTTTTTTGCAACGTTGCTACTACTAGTTAATATTATCTTCAAGTGTTTATGTCCGGGGAAGGTTCCCGTGTGTATAATAGAATAAAATTCATACGATTAATTACTTACGCTGAGCATGATCACCTGATTGTGCAAGTCTTCATCGGTATATCAGAGGTGAAGGTATCGTCAGTTTCTGATCTGTGTGAGAACGTACAGGACTGCTCTGTTCTTTTCCAGTTTCAACACCCATACACCGTATAT…	-
RPS19A	S_Cerevisiae	1.0893	0.0295395	TTTCATATTTACTTTTTTATTGTTACTCATTTGTAATTCATAAACTACATACACTTTCAATCGTTTCTTTCAAACTACATAATTTTTACTGGCGATCAATAACGCATTTAGTTCATAAAGTGAGTCAAAGTTAACACTAGAATATTTGCTACACCATCAATAGGCTAGACCATAGTTGAAAACTTTCATAATAAATTCTTCCGTTTTCAATCTTCATATACTGTGTCTCTAACCATGATACCGTGACACAACTACATCCGTACACATGTGACGTTCGTTCAACCCGTACATTTATATAAAACCGTTCTGGCGGCCTTTTATTTTTTTACATTTCTTATGATCGGGATTGCAGAACGCCGTGAAATTTTTCAATGTGAGGTTCGGCCTTGTTTGCAAAAG…	TTTCATATTTACTTTTTTATTGTTACTCATTTGTAATTCATAAACTACATACACTTTCAATCGTTTCTTTCAAACTACATAATTTTTACTGGCGATCAATAACGCATTTAGTTCATAAAGTGAGTCAAAGTTAACACTAGAATATTTGCTACACCATCAATAGGCTAGACCATAGTTGAAAACTTTCATAATAAATTCTTCCGTTTTCAATCTTCATATACTGTGTCTCTAACCATGATACCGTGACACAACTACATCCGTACACATGTGACGTTCGTTCAACCCGTACATTTATATAAAACCGTTCTGGCGGCCTTTTATTTTTTTACATTTCTTATGATCGGGATTGCAGAACGCCGTGAAATTTTTCAATGTGAGGTTCGGCCTTGTTTGCAAAAG…
RPS19A	S_Paradoxus	1.16541	0.0181577	TTTCATATTTACTTTTTTATTATTACTCATTTGTAATTCATAAACTACATACACTTTTAATCGTTCCTTTCAAATCAGGGAATATTTTATTAGTAATTAATAACTCAGTCACTTCATAAGTCGGATCGAAACTAGTGCTGGAATATTTGTCAACCCATTATTAGGCTGAACCACGGGTCCGATGATTCTGATTAAAGCCTCCAAAACTAACTCTTTCACTTTCAGTCTTCATATATTGTATTTCAAACTATGATGCTATGACAATAATTACATCCGTACACATGCGACGGTTCTTCAACCCGTACCTCTTTTAAAGCGTGCTGAGTGCTTCTTTTTTTTGCATTTCTCATAAGCCGAGGTTACCGAACGTCGTGAAATTTTTCAATGTCAGGTTCGGTC…	TTTCATATTTACTTTTTTATTATTACTCATTTGTAATTCATAAACTACATACACTTTTAATCGTTCCTTTCAAATCAGGGAATATTTTATTAGTAATTAATAACTCAGTCACTTCATAAGTCGGATCGAAACTAGTGCTGGAATATTTGTCAACCCATTATTAGGCTGAACCACGGGTCCGATGATTCTGATTAAAGCCTCCAAAACTAACTCTTTCACTTTCAGTCTTCATATATTGTATTTCAAACTATGATGCTATGACAATAATTACATCCGTACACATGCGACGGTTCTTCAACCCGTACCTCTTTTAAAGCGTGCTGAGTGCTTCTTTTTTTTGCATTTCTCATAAGCCGAGGTTACCGAACGTCGTGAAATTTTTCAATGTCAGGTTCGGTC…
RPS19A	S_Mikatae	1.18782	0.0323072	TTTCATATTTACTCTTTTATCATTACTCATTTGTAATTCATAAACTACATACACTTTTAATCGTTTCTTTCAAATTTTGGAACATTTCATTAGTATTTAAAAGCGTAGATACATGATAAATTGTGTCAAACCTTACCGCGGAACGATATCATCCAACTATTAGGTTGACCGCGGGTTCAATGGTTCTGGCTAACACTTTTAAAAGAACCATTTTCATTTTCAATCGTCGTTCATTCTACTACAAGATTTCAATTCTGGATACTATACATCCGTACATATGTACCACATGTTAACCCATACCTTCTCTTGAGCTGGACTATAGCGCTTTTTTTGGTTCTCATGAAATTCGGTCACCATACGCTGTGAAACTTCCAAAGTCATATTCGGCATTCTAGCCTT…	TTTCATATTTACTCTTTTATCATTACTCATTTGTAATTCATAAACTACATACACTTTTAATCGTTTCTTTCAAATTTTGGAACATTTCATTAGTATTTAAAAGCGTAGATACATGATAAATTGTGTCAGACCTTACCGCGGAACGATATCATCCAACTATTAGGTTGACCGCGGGTTCAATGGTTCTGGCTAACACTTTTAAAAGAACCATTTTCATTTTCAATCGTCGTTCATTCTACTACAAGATTTCAATTCTGGATACTATACATCCGTACATATGTACCACATGTTAACCCATACCTTCTCTTGAGCTGGACTATAGCGCTTTTTTTGGTTCTCATGAAATTCGGTCACCATACGCTGTGAAACTTCCAAAGTCATATTCGGCATTCTAGCCTT…
RPS19A	S_Bayanus	1.11398	0.0112542	TCTCATATTTACTCTTTTATTACTCATCTGTAATTCATAAACTACATACACTTTTAATCCTTTCTTTCAAGTTATGAAACACATCTTCAATATCTTACTTATTTTGGTTATGTTTGGGAAGGCGATATTTAGTCACCACTAGAAGGGAAACATCACTTCTCAACAATGTTGCCGTTATTAGGATCGAGCATGAGATCAGACTTCAATACAAATACTTCATTTCTGAATCATGCTCGACCTTTGCTTATTATCTGCAACATAATATATTGCTATGACAGCTCTACATCCGTACATATGCGTATAATTTGGAAATCCGTACCTTTTGAAACAGCTAACCGCTTTTTAATTATTTTGTTCTTCATGAAGCGAGCCGCGAAACATTGTGAAAATTTCCAAGTT…	TCTCATATTTACTCTTTTATTACTCATCTGTAATTCATAAACTACATACACTTTTAATCCTTTCTTTCAAGTTATGAAACACATCTTCAATATCTTACTTATTTTGGTTATGTTTGGGAAGGCGATATTTAGTCACCACTAGAAGGGAAACATCACTTCTCAACAATGTTGCCGTTATTAGGATCGAGCATGAGATCAGACTTCAATACAAATACTTCATTTCTGAATCATGCTCGACCTTTGCTTATTATCTGCAACATAATATATTGCTATGACAGCTCTACATCCGTACATATGCGTATAATTTGGAAATCCGTACCTTTTGAAACAGCTAACCGCTTTTTAATTATTTTGTTCTTCATGAAGCGAGCCGCGAAACATTGTGAAAATTTCCAAGTT…
RPS19B	S_Cerevisiae	1.3405	0.0254418	TCTAGTATGGTTTGAAACCTTACAATTTTTCTTCTTTGTTCCTTTTTCCTTGTTTCAGTGTATATTAGGTTGGGAAAGAGGGATTTTTCCATACCATATGACTGACTACAATATATACATGTATAATAACTTCATAATCTAAACCTATCAGTTCAGTATCAAGTCAGCTATTCCGCCCTATGCATAAACCTACAAACTATCATTCACACACTTTTCCCATTTTTTTTCAATACTACTTTACATCCGAACATTTTAGCAACCCACACCATATACCTTTGGTGCACTATTGATTTTCTTCCTGATGTCAGCTTTTTGTGCTTTGACAAAAAAATCGCGTCTACGTCCGTCCGTTCTCCCTGAATAAATTAGGCGCGTTTGAGCCCAGCAGGACGGAGCTCT…	TCTAGTATGGTTTGAAACCTTACAATTTTTCTTCTTTGTTCCTTTTTCCTTGTTTCAGTGTATATTAGGTTGGGAAAGAGGGATTTTTCCATACCATATGACTGACTACAATATATACATGTATAATAACTTCATAATCTAAACCTATCAGTTCAGTATCAAGTCAGCTATTCCGCCCTATGCATAAACCTACAAACTATCATTCACACACTTTTCCCATTTTTTTTCAATACTACTTTACATCCGAACATTTTAGCAACCCACACCATATACCTTTGGTGCACTATTGATTTTCTTCCTGATGTCAGCTTTTTGTGCTTTGACAAAAAAATCGCGTCTACGTCCGTCCGTTCTCCCTGAATAAATTAGGCGCGTTTGAGCCCAGCAGGACGGAGCTCT…
RPS19B	S_Paradoxus	1.45275	0.0323632	TCCGGCATGCTTTGAAAACTCGGGCTCTTTTATTTTCTCCTTTTTCCTTCTTTCAGTATATATCAGGTTGGAAAATAGGATTTTTCCACACCATATGGCTGACTAAAAATATATACTTGCGTGTGTAATAACTTCATAATTCAAAACTATCAGTCAGTATCCAGTCAACTGTTTGGCCTAATACATAGCCCGTAGACTTTATCATTTACACTTCGCAAAGCTTTCCGCATGCCTCACTACTACTTTACATCCGGACATTTTATAAACCCACACCCATTTTATAGTTTAGTAGATTTTTTTCTTTCTGACATCAGCTTTTTTGCGCTTGGGTAAAAACCGCGTCTGCGTCCATCCTCTCTAATCAACTAGGCACAGTTGAGCCCATATGGACGGAGCTCT…	-
RPS19B	S_Mikatae	1.55084	0.0367923	TCTAGTATGCATCGAAAGCTCCGATTCATTTTTACTTTCTACCTTTCCTTTGCTTCAGTATGTACCAGGCTGGAAAATGGGATTTTTCCAAGCCATATGACTGATTACAGTAAATATCTGCATGTATAGTAACTTCATAATTCAAGAATATCAGTCAGTATCGAACCGAACCAACTTTTTTTTTTTGATCAGTACAGTATATGTAGTCTATAGTCCATTTTTCACTGCTAAAAAAAACTAAAACATCAATACTGTTTACATCCGAACATTTTTCAAACCCATTCATCTTTATTGTGTTTTTTTCCTTTATTTATTATCATTTTTATGCATGGGCCAAAAGCGCGTTTGCGCCCATTCCCATTGATTCACCAGGCACAGTGGAGGCCATCTGGACGGAGC…	TCTAGTATGCATCGAAAGCTCCGATTCATTTTTACTTTCTACCTTTCCTTTGCTTCAGTATGTACCAGGCTGGAAAATGGGATTTTTCCAAGCCATATGACTGATTACAGTAAATATCTGCATGTATAGTAACTTCATAATTCAAGAATATCAGTCAGTATCGAACCGAACCAACTTTTTTTTTTTGATCAGTACAGTATATGTAGTCTATAGTCCATTTTTCACTGCTAAAAAAAACTAAAACATCAATACTGTTTACATCCGAACATTTTGCAAACCCATTCATCTTTATTGTGTTTTTTTCCTTTATTTATTATCATTTTTATGCATGGGCCAAAAGCGCGTTTGCGCCCATTCCCATTGATTCACCAGGCACAGTGGAGGCCATCTGGACGGAGC…
RPS19B	S_Bayanus	1.38864	0.039495	TGTAATAGAGCTGTAGTTCTCTTTTTATTCTTTGTCTATCTCTTTCTCGTTTCGGTACATACCGGGCAGGGGAATCGGATTCCTTTCTACGCCATATGACCAATTAAAATAAATAAACGCATGTATAATAACTTCATAATTCTAAGATATCAGTCAATATCAATCGAAATTCTTTTTTATTACAGACCCCGTAACTATATGGGCAACGTGATTAATTAGCGTCGTCTCTTCGGTTTCAAGACTGTTTGAATTTTACATCCAGACATTTGTTTCGATTTGGCTCTTTTTTTTCCCCGCTGGAGAGTATTTTTTCAGCCATAACCAAATTTTTGTGCGTGAGTGAAAGGCGCGCTCGTCTGTCCGCCGTGAACAGGCCGGGCTCAGCTGGTGCCGTTGTAG…	TGTAATAGAGCTGTAGTTCTCTTTTTATTCTTTGTCTATCTCTTTCTCGTTTCGGTACATACCGGGCAGGGGAATCGGATTCCTTTCTACGCCATATGACCAATTAAAATAAATAAACGCATGTATAATAACTTCATAATTCTAAGATATCAGTCAATATCAATCGAAATTCTTTTTTATTACAGACCCCGTAACTATATGGGCAACGTGATTAATTAGCGTCGTCTCTTCGGTTTCAAGACTGTTTGAATTTTACATCCAGACATTTGTTTCGATTTGGCTCTTTTTTTTCCCCGCTGGAGAGTATTTTTTCAGCCATAACCAAATTTTTGTGCGTGAGTGAAAGGCGCGCTCGTCTGTCCGCCGTGAACAGGCCGGGCTCAGCTGGTGCCGTTGTAG…
RPS2	S_Cerevisiae	1.28402	0.0142794	TCCGATGTACTGATTCTACGTTTGTGTACTTTGATAGACTTTTTTATTCAATTCGTATTCACTACTATCTTTGTCTCGTACCGCGGTTTTTATCCTTTATTTCAGCCCTACGAGATAGAACGATGGAGCCTAGTAATACCATTTTATGTAAGCAAAATAAGAAGAAAGACTAAAAGAATTAGGATATGTTGTTAATCAGGGATAAAGGTACGCATACTAGCCTTACTACGTAAATATAAGGTTACGGTTTACGATCACTATTGCAAGATACTATTGTTTAGCATTGGCAAAGACTTGACGGGAAATCTTTGATTGGGCCCAACCATATTCATTAAAGATCCGGGATGTGAGCTTGAACTGCTTTTCGACGCGAAGAAGGTTTACACGTATTTTAGTAAT…	TCCGATGTACTGATTCTACGTTTGTGTACTTTGATAGACTTTTTTATTCAATTCGTATTCACTACTATCTTTGTCTCGTACCGCGGTTTTTATCCTTTATTTCAGCCCTACGAGATAGAACGATGGAGCCTAGTAATACCATTTTATGTAAGCAAAATAAGAAGAAAGACTAAAAGAATTAGGATATGTTGTTAATCAGGGATAAAGGTACGCATACTAGCCTTACTACGTAAATATAAGGTTACGGTTTACGATCACTATTGCAAGATACTATTGTTTAGCATTGGCAAAGACTTGACGGGAAATCTTTGATTGGGCCCAACCATATTCATTAAAGATCCGGGATGTGAGCTTGAACTGCTTTTCGACGCGAAGAAGGTTTACACGTATTTTAGTAAT…
RPS2	S_Paradoxus	1.42077	0.0343672	TTCGATATACTGTTTATACGTTTGTAGTTTGATAGATTTTTTATCCAGTTTGTACTCACTATTATCTTTGTTTCGTACCGCGGTTTTTTATCCTATATTTCAGCCCTACGAGATAGAACGATAAAGAAGTCTAGTAGTACCTTTTTATGAAAATAAATTAAGAGTAAGAGCTAAAAGCACGAGGAATATATTTTTAATAAGGCGTTAAGATATACATGCTAAGAGTCTTACTGCACAAAAATAAAGTTACTGTTGTTCAACATTGGCTGACGTTTTGACTACAAGGTTAGAAATATTGGCAGGATTTAAGGGGAGAATTATTGATTGAGTCATGCCATTTGCACCAAAAGGCTCGGATGCGAGCCTGAACAACTTTTGAAGCGAAGGTAATATACAGTA…	TTCGATATACTGTTTATACGTTTGTAGTTTGATAGATTTTTTATCCAGTTTGTACTCACTATTATCTTTGTTTCGTACCGCGGTTTTTTATCCTATATTTCAGCCCTACGAGATAGAACGATAAAGAAGTCTAGTAGTACCTTTTTATGAAAATAAATTAAGAGTAAGAGCTAAAAGCACGAGGAATATATTTTTAATAAGGCGTTAAGATATACATGCTAAGAGTCTTACTGCACAAAAATAAAGTTACTGTTGTTCAACATTGGCTGACGTTTTGACTACAAGGTTAGAAATATTGGCAGGATTTAAGGGGAGAATTATTGATTGAGTCATGCCATTTGCACCAAAAGGCTCGGATGCGAGCCTGAACAACTTTTGAAGCGAAGGTAATATACAGTA…
RPS2	S_Mikatae	1.25301	0.0321056	TCATATGTGTTAAACTTCTATGTTTGTGGTGTGGTATACCTATAATTTGCTTCGTATTTGCTGGTAGCTTTGTTTCTTACCGCGATTTTTTGTCCTTTATTTCTGTTCTTAAAGGTTGAACAGCATCACTGCTCAATAAAAAGGGATCAAGAGTTAGAGCCAAGACGCATCAAGAATACATTCATCAGAATATACCCTCTTTAAGAAATTTACTACCCAATAATACCGTTACTTTCATTGTCGCAAGACGTTCTTTTCCAGCATTCCGTGACGTCCTAACTATGAGTCTGAAATTACTGGTAAAAATTTAAGGGGTAAGATATTTTTCACTGTGTAATATTATTTATGGTAGACAGCTTGGCTATGAAAGTATACTACCTTTCAATGTCAATGCAGTTC…	TCATATGTGTTAAACTTCTATTTTGTGGTGTGGTATACCTATAATTTGCTTCGTATTTGCTGGTAGCTTTGTTTCTTACCGCGATTTTTTGTCCTTTATTTCTGTTCTTAAAGGTTGAACAGCATCACTGCTCAATAAAAAGGGATCAAGAGTTAGAGCCAAGACGCATGAAGAATACATTCATCAGAATATACCCTCTTTAAGAAATTTACTACCCAATAATACCGTTACTTTCATTGTCGCAAGACGTTCTTTTCCAGCATTCCGTGACGTCCTAACTATGAGTCTGAAATTACTGGTAAAAATTTAAGGGGTAAGATATTTTTCACTGTGTAATATTATTTATGGTAGACAGCTTGGCTATGAAAGTATACTACCTTTCAATGTCAATGCAGTTCT…
RPS2	S_Bayanus	1.33982	0.0369043	TTCACTTTCCTGTTTCTATTAATACTTTTGAAACGCCTCTGGTCTGTTTATGTGTTTACTTCAAGCAAGCTTTGTTTTATATTCCGATTTTTGTCACTTACTACTCTTGAGATTTGCAACAAAATAAATAAGTTACGCAACGTTTGAATAGGACAAAAGAAAGGTAAGAAGCGAGGTTCAAGATATATCATAAACCGGCTGGCATATACATGCATCAATAGCACTGAAATAATCTTTTTTTTTACTGTAACACATTAAAAAGCCCTTCAGTCTTTGCCACATTGCCACTACAAGCCCGAGCCCATTGGCAAGAAAGGAAGAAAGGTATTGCTGTTTCTTGAAGCGTATCTTGAAGGCCATACAACATGACCACAGAATCGGACTCGGTAGAGACTGTTG…	TTCACTTTCCTGTTTCTATTAATACTTTTGAAACGCCTCTGGTCTGTTTATGTGTTTACTTCAAGCAAGCTTTGTTTTATATTCCGATTTTTGTCACTTACTACTCTTGAGATTTGCAACAAAATAAATAAGTTACGCAACGTTTGAATAGGACAAAAGAAAGGTAAGAAGCGAGGTTCAAGATATATCATAAACCGGCTGGCATATACATGCATCAATAGCACTGAAATAATCTTTTTTTTACTGTAACACATTAAAAAGCCCTTCAGTCTTTGCCACATTGCCACTACAAGCCCGAGCCCATTGGCAAGAAAGGAAGAAAGGTATTGCTGTTTCTTGAAGCGTATCTTGAAGGCCATACAACATGACCACAGAATCGGACTCGGTAGAGACTGTTGA…
RPS2	S_Kluyveri	0.793718	0.0135584	GTTGTGTGGATGTGTCTTTGTCACTGTTGTAATATTGGAGTTCGAGGAGAGAAAGTGGAAGACGGCACTTCAAGGGGTTCCTCTCCCGTCTCTTTATATAGTCTCGCTTTTACTTTTTTTAAGGGAGAAAGGATATCATTAAATCACGGCATACTACAGAGAAAGGAGATACGTATGGGTGGTGTCAGATTGCTCTCCAGCCAAAAACACCGTCCCGAACCTATCCGGAAATCATAAATGTCTTGAAAGAAGGTCCACAGCAAACTGGTCGTGTCAGTCCTTTCCCGCTTCTACGCCATTCCATTGAAGAGAGCCTGCTACCCTCAATAGCAATTCTTATGGCTGACCGCATGGTAAGGCGAGCAATTTGCCGTCCGCACAGGCGCCATCCCCGCCTTT…	-
RPS2	K_Lactis	0.698796	0.0709065	AAATATCCGTGCTCAGAACTGATCTAGAAAACAAAAAAAAAAAAAGAAAACGGGAGATCACAATCACAATCACAATCCCAATCACGATAAAAGCTAAAAGTCGAACAATGATGAAATGTCACAGTGTGACGAAGTGTAACTATTGGTGATGTAGTGTGAGTGCTTTTATGTATTATGTATTGTAATACGGATGGAGCGGTTACAGCCGGTTCCCGCTGCGTTAGTTTGGCTTCTCTGTTCCACGTTTGAACATTTTCTTTCCAAGATGCTGAGAAGGTGTGCGGCATAAACGTCATTTACGCTGGATAGCGATAGAAGTAATCACTTTTCTGTCTCAGAAGATGAATTTGCTTCTGTCTAATAGGCCAATTGGAGTGTATTTGCTACTAACATGGCTTG…	-
RPS2	D_Hansenii	0.0333506	0.00925237	CTTATGTAGTATTTGTTAAATTAATTCGTATCCTTTGAAAACTATATAAAGAATCAAAGAAAAGCCCTTGTATTAATTTATATTACTGTGTGATACCAGGGGTCAACCGTGAATCTATTTTGCTGATGATGAATTTAATTTTATTGCTCTATTGCTGTCCCTGTATACAATGAACTACTCTGATATATGGTCATACAAACTGGATTTTTCGACCCCTTCACCGCTTATTTTCGATCAATTGACTTTCCATATCTGTCTACACCCATAGTTGTTGTACTTCGTTCCCAAATATCGTTTTTTATGACCATCTATATCTCTTGACACCTCTTTGCGAGTTCCGGGTCTGGCCTATCTACGGGAATTAGCAATAATTCTTATCGGCGAGAACAAGAAGAACCT…	-
RPS2	Y_Lipolytica	0.00344389	0.00821786	CATAAACTGGTGTCGCGGACATGTGATATCACAGCATCACTCGTAATCTGGGCTTGGTGAACACTTGTCGGCTACTTGTAGTTCGGTTCACAGTCGTTGTCGATTCCTGAGAAACATGAAAATGAATAATCGCACTTGTGTCAAGTGATGATCTACTTTTAATGTGGTTGGAATTGGAGGCCGGTGATGAATGTTCCTTTTTACAAGTATGTAAATACGTACTATGGTCAGTTCCGAGCTCTCGTATTCAAGATTCCAACGGAAACCAACCACTAAAGCTGGCGCGCAAAGCAGTTTAGACGAGAATCCTGGAACTACCAAACAGCGGTGAAACTGTAGCTGGATTGTAGACCGTTAGTGGTACTACACGCACCGCCTGTGCCGTCTTTACAATGGGAC…	-
RPS2	S_Pombe	0.000629215	0.00565398	TTTGTAGACAGCGGTGACCACGATGGGGTTTAGTGAAAGAAGAAGTTGTTGAAGTAGATTTTGTGTTGCTAATAAAAAGTGACTGTTCCAAACATATACCCTACCCTAATTGTTACATTGATGAGACGAGGCAATCGAATCGTACATACCGGGGTCAAAAGAAGCGTTCAGATGTTGATCGCAACTTAAAATAAGAGAATTAAAAGGAAGTTGCTTGAGAGAATTAGTTGAAAATTGAATCGAAGAAATTTATGGATTTAAGTCCTAACATTGAGCAAGTAACAAATTGCCGGTAACAACGAAAATTCGTTCACAGGGAACTAAAAAAAAACAAGCAAAAGTTGGTCCCAAGGAGCCATTAAAGAATCCAATCATTAAAATAAGGTAAAAACCTTATAA…	-
RPS20	S_Cerevisiae	2.05282	0.0118902	GCGCCAAATCTGCACCTTGTGCATTTTGTTCACACATTCTTGGCGCTCCTAACTGGAGAAACGTCTATCATTGAGGATAACTCCGGATAGTCGCATTCTGATTGAATAGCCGTCTAGCTCCCTATTGTGACTAGAATACTATTGACATCGTTTTCTCATCAAAACCTCCCGATAAAGGGAAAAAAAGAATTATCTGACCAGATCATTCGGAAAAATGCGTATCGTCATTGATATCCTTCTTGTCTTGTCTGCTGCTAACACTATTTACTATGGAAAGAGAGATTTCCCTGAAACTTCTTATTTTTATCTCTATAGAAGGGGAAAAGATAAAAGTAAAAATGTAAAAATGTTTACCTGCAAGTTCACACCTGTACATTTTCTACATCCGTAAACATAAGA…	GCGCCAAATCTGCACCTTGTGCATTTTGTTCACACATTCTTGGCGCTCCTAACTGGAGAAACGTCTATCATTGAGGATAACTCCGGATAGTCGCATTCTGATTGAATAGCCGTCTAGCTCCCTATTGTGACTAGAATACTATTGACATCGTTTTCTCATCAAAACCTCCCGATAAAGGGAAAAAAAGAATTATCTGACCAGATCATTCGGAAAAATGCGTATCGTCATTGATATCCTTCTTGTCTTGTCTGCTGCTAACACTATTTACTATGGAAAGAGAGATTTCCCTGAAACTTCTTATTTTTATCTCTATAGAAGGGGAAAAGATAAAAGTAAAAATGTAAAAATGTTTACCTGCAAGTTCACACCTGTACATTTTCTACATCCGTAAACATAAGA…
RPS20	S_Paradoxus	1.958	0.0895367	GCGCCAAATCTGCACTTCGTGCATTTTGTACAAGAATTCTTGGCGGTACTAACTGGAGAAACGTCTATCATTAGGGAGTACTCCGGATAGTCACACTTTCATTGAATAGCCGTGCAGTTTCTTCCTGTGACCAAAACACTGCTCACATCGTTTTCTCATCATAAACCCTTGATGAAAAAAAATGAAAAAAAATTCATATTATCCAGACCATCCTGGAACATGCGTATCGTCAATTGATATCTTTCTTGTCCAGTGCTGGCCGATTTCTTTACTATGGAAAGGAAGATTTCTCAGATTTCTTGTGAGACTTCTTATTTTTTCTCCATTGTTGAAGTAAAAATAAAAATGAAAAAGTGAGATTTTTTCACCCGTGACTTTACACCTGTACATTTGAAACAT…	GGCCCAAATCTGCACTTCGTGCATTTTGTACAAGAATTCTTGGCGGTACTAACTGGAGAAACGTCTATCATTAGGGAGTACTCCGGATAGTCACACTTTCATTAAATAGCCGTGCAGTTTCTTCCTGTGACCAAAACACTGCTCACATCGTTTTCTCATCATAAACCCTTGATGAAAAAAAATGAAGAAAAATTCATATTATCCAGACCATCCTGGAACATGCGTATCGTCAATTGATATCTTTCTTGTCCAGTGCTGGCCGATTTCTTTACTATGGAAAGGAAGATTTCTCAGATTTCTTGTGAGACTTCTTATTTTTTCTCCATTGTTGAAGTAAAAATAAAAGTGAAAAAGTGAGATTTTTTCACCCGTGACTTTACACCTGTACATTTGAAACAT…
RPS20	S_Mikatae	1.95432	0.0595717	GCGCTAAATCTGCATTATGAGCCTATAATTTCAAATTCTTGGCGCCCGGAGCAGTAGAAACGTTTTCTTTCAAGAAAACCCCCAGATAATCATACTTTCACTGAATAGCCGCTTAACCCCAACACTCTTCTAACCAGATTACAGCTCATGTACTTCTCACATCAGAGACTTCAAATGAAAAAAACAACAACAAAACAGCGCACACGATCCAGGTCATCCAATAGCACACAAAGTATCACTTATCGATGTCTTTTTACGGAATGTAGAATTGACTGTTTTCGTGTTGTTTTTCTGTAGAATAGAAGTTTTTGAAGGGAGTTTCTAATTTTTTCCTTTCTGATAAAAGCAAAAGTGAAAACATATTTCCTTACTTAACACCTGTACATTTAACACATCCGT…	GCGCTAAATCTGCATTATGAGCCTATAATTTCAAATTCTTGGCGCCCGGAGCAGTAGAAACGTTTTCTTTCAAGAAAACCCCCAGATAATCATACTTTCACTGAATAGCCGCTTAACCCCAACACTCTTCTAACCAGATTACAGCTCATGTACTTCTCACATCAGAGACTTTAAATGAAAAAAACAACAACAAAACAGCGCACACGATCTAGGTCATCCAATAGCACACAAAGTATCACTTATCGATGTCTTTTTACGGAATGTAGAATTGACTGTTTTCGTGTTGTTTTTCTGTAGAATAGAAGTTTTTGAAGGGAGTTTCTAATTTTTTCCTTTCTGATAAAAGCAAAAGTGAAAACATATTTCCTTACTTAACACCTGTACATTTAACACATCCGT…
RPS20	S_Bayanus	1.89808	0.0395152	GCGCCAAATACGCAGAATGTTTTTTACACATTGAGCGTATTCTTGGCGTTCCCTAACACCAGACACGTTTATCATAGAAAGAACCCCACATATCCCACTTTCACAAAATAGCCGCCTAACCTCTTCTTACGCCTGGAATGCCAAGTATCCGTATATTCTTTCACCAAAAACTCCCAAAAACAAAAAAGGCGCAAAAACCAAATCACTACGACGCTTGTGTAGCGCCTACCAATATTTCCTTTCAGCGTCCTTTATCGTTCTCTATTTTGTTATCGTCTGTAGAATAGAAAGCTTCTTTGGGAAGAGTTTCCGAATTTACCCTTTTATTCTAACCCTTTCGAAAAAATAGAAATAAGAAAATACAGGACCGCCTTTTGAAATCCGTACATTATCTACATC…	GCGCCAAATACGCAGAATGTTTTTTACACATTGAGCGTATTCTTGGCGTTCCCTAACACCAGACACGTTTATCATAGAAAGAACCCCACATATCCCACTTTCACAAAATAGCCGCCTAACCTCTTCTTACGCCTGGAATGCCAAGTATCCGTATATTCTTTCACCAAAAACTCCCAAAAACAAAAAAGGCGCAAAAACCAAATCACTACGACGCTTGTGTAGCGCCTACCAATATTTCCTTTCAGCGTCCTTTATCGTTCTCTATTTTGTTATCGTCTGTAGAATAGAAAGCTTCTTTGGGAAGAGTTTCCGAATTTACCCTTTTATTCTAACCCTTTCGAAAAAATAGAAATAAGAAAATACAGGACCGCCTTTTGAAATCCGTACATTATCTACATC…
RPS20	S_Kluyveri	0.948431	0.0527533	AGTATTTGGTAGCGTCGACTAAGGGGTGCAAAGAACAACTCTATTAAAGTATTCTTGCTGAGACGAATACTGATAGTAGAAGTTATAAATTTGAAACCAAGGAATAATCCATCAAGAGGTAGATTTACAAAGCCTTTTTATATAATTTCCTCTCTCCTTACTCATACACTCCTTGATAATAGAAATCAAACGTGTTTGTTTTCCAATCCCATGGGCTATCTCCATTGGTGATAAACATTATACCCAACGGACCACAACAAAACACCCAATGGAGATATTTAAATGTGATAACCGGCTTTTCGCACCCATACCCATACATCGTGCAGTCCTTTCATTTATCTTTATAATACACCCATGCATTCTACTCACAATTATGCGGGGAATTTTTGCATATACATA…	-
RPS20	K_Lactis	0.596644	0.0193825	GATAAATAGCCAGTATGTTGGTTTTTGACAGTTTCAACGGGAGATAATATACAATGCCATCAGAATTAGTTTAAGCGAAGTATCAACTGGGATAGAACTATTTCATTCACTAATGAGTGTATTTATATACTTCGTGGATGGTACACATACATTATCCTTAATTCAATCCTAAGTGTATTGGAACGTTAGTTTGCACAAAAAAGGCATTCTTATCTTTTGCAATTGACCTGTTTCGTTATTCTGGCAACGATTGATCCTTAATGTTCAAGAATCTCCGTCGCACCTCCGACGGATATTACCGGGGACTGCTCATTCTTTATACACCCGTACATATATGCCATGGGATTCTACTTTTTTGATATAATCATCCTCTCTTTCCTAAAACAGAATACTATATGA…	-
RPS20	D_Hansenii	0.132032	0.00798947	GCCATTTTTAAAGGATTGCACGAAGAAAAACCACGGCTATATCTAAGTCAACATAGCTAGAATATACGTTTATATTGTCAATGCAAGTTAATGGACGGCAGATGCAAAATACGCGTTTGGATAATAATGTAGATAGGAGTTGGCACCGACGAGTGTACACGAGCATCTAGAGCCTCCAATTAGAGATAAATAGCTACATCTATCGTAATGTTTTACAGGGCGTACTAGTCAGGCGGAATACTATTCATTTTAATTTTTCTATTATTGTATTCATAGTTTATTGAATGTCACTTTTTAAACCTTTGCAAGGCTGCTTCCAAAGTTGATAACTATATTTCAGTCTCAATTATATCTCTACTTCGACCATTCTGGCAATGCCAAAATGATATACCAGCACCA…	-
RPS20	Y_Lipolytica	0.168932	0.0147608	TGTAGATAGAAGAGCACCAAGACTACTTGTCAATGGCAATTCGACTTGTGGCAGACACTCTTGGTCGTATAGTCGTATCACTATCATACCATTGCAGCATCACTTCGTATCGTACTGTACGTACATTGGTCCCATTGGCAGGGTCTCACTCCAATGGTGCACCTAAGAATGCCATACTTGCGCAGAACCCCACTTAGTGCCTTAGAAAGAATGTGCGCTATCTGACATTCCACCAGGTTACAAAGGCGATAAGACCTGTCAAATATTGGGAATGTGGTAGCTGGCTGGCATGTGACACGTTCACCTGTCTTGAAGAAATATGTATTGTATCGTACTCCTACATGTATCGTACTCGTACCTGTACTTCTCTCCACTTCACCCTCGTCTCTGGCTCCTATG…	-
RPS20	S_Pombe	0.0056607	0.00784168	TTCTGCTAATTATTCCAAGTTCCTAAAATTGTGTAGGTAACGAAGGATGATAAAAAATTTGGATGCTCAAAAGCTTCTATAATGAGTGTGACTGTTTGGGCTCATTAGGGTAGGGTTCTCTCTCGAATGAGAGTTAAGTAAGAATGACTTAAAAAATTTGTTTTGAAAACTTATAAGGTTTTTACCTTATTTTAATGATTGGATTCTTTAATGGCTCCTTGGGACCAACTTTTGCTTGTTTTTTTTTAGTTCCCTGTGAACGAATTTTCGTTGTTACCGGCAATTTGTTACTTGCTCAATGTTAGGACTTAAATCCATAAATTTCTTCGATTCAATTTTCAACTAATTCTCTCAAGCAACTTCCTTTTAATTCTCTTATTTTAAGTTGCGATCAACATC…	-
RPS21	S_Kluyveri	0.892738	0.0144943	GAAGAGAGAAAATGTATTTATTTGAAGCGTGTATACTAGTATGCTTTTTAATAGCGGAGATATAGAAAAAAAGAAGAAAAAAGATTAAAGAGTGGTACAAACGTATTACTTGCAGTGGGGGTGGGAGTGTCTTTTAATTTTATTTTTTGTTTTTTTTTCTTGTTCTGGCGTTGGCACGCGTTTGGTTGATCAATCGATTGTGTCTGTCCACTGTCCGCCGCATCGAAAGCAGTCCAATGTTGTCAGGTTTCCGCCCATACATATTGTACCATTTTTGTGTGTGCACTTTTGCTCTGGTTTGCTTTCCTCGTGCGACGTGGAGGACGCGGGCGTTTCTGCTGCCTGCTCTGAGCGGTGCACGTGCATTACAGGATGCCAATGCGCATTTCGCAGCCCAGA…	-
RPS21	K_Lactis	1.572	0.0161155	TGGCGGCGAAGCGTATCTTGTCAAGCAGAATTACGATAATTGACATAAAATGTGACACCGTTATATAACAATGATATTGAATGCCGACAATACACGCTATACCTTCAAACTGTAACAGAGTTATTAATGAAAGGTAATATCCCTCTTTGCCCTTACAAGTGTATTTTACTGCTGATGTATGTTAAACTGTCATCTGTCGCACGCATGTCACAAATCATTAACATCGGAGCATCTTCTCATGAGTAACAATCAGGACTGTTTTCTGATTAGACACATCCTTACATTTTTTGAAGGAGTTAATTTTTGTGGTTTAACACCCATACATTTCATCTTTTTTTATTTATTTCTCCTTGTATATTTGGAAAAATGTGTAATATTTCCTAAGTTAGTATATATTTT…	-
RPS21	D_Hansenii	0.710086	0.0122372	CTGGCCAGCACCACCATTAATCACAATTACATAGCACAATGCATAATTATCAACCATGTTGTCGTAAGACCCATTGTACATAAAGCTCTTGAAGCTACCTTGATCTCTACTATCTTGATCTCTACGACCTTGAACTCTACTTCAGTCCATTTTGCAGCATCTTAGATCTCGATCAACAATCCAGTATACAAAAGTTTCTCTACCAATATACGCTCTATATCGTTGAGCAAACCATAATCTAACTCTACTCCCTACAACGAAATGTCCTTCGTTTCAGTTTATTTCGTACATTCACCTACCTTCACTAGTCCCTAGAACACGTTTCTGGAACCCCCAAGACCATGTTCTCATATTAGGGCTTAAAGCCCTAGTACCACCCAATCTGAAAACCGACATTTT…	-
RPS21	Y_Lipolytica	0.0239415	0.0046956	TCAGGTGATGTATGTTGTATATACTCATAGAATACACTTGTATGTCCCTGCATCCCTGTTTTGTTTTTTGTTGATTTTATTGGGTTTTGTTTGATTTGTCTGATTTCCTTTGATTTTTCTGAAATTCTTTTGATGTATTTGATTTAATTGGGATTTTAATCGATTTTATCTCTATCTCATTTTATTTTGTTTTTCTAAATTTGTTTTTCCTAAATTTTAATATTTCATCTGAATTTTCTTGATTTATCTTTTATAAATCGAATAAATCACTATAATATTTGCTAAAGTTCACGTGACCCCATACCCCTGGTTGCATTAGGGCTAGCCCTAATTGTGTACACGTGCCTTGTTTCAAACCTTATTCCCGTTTCGACTCTGGTTCCCCCAGCGATACTCCCA…	-
RPS21	S_Pombe	0.00396562	0.0033476	CGCTGCCGTTTTTCGCCAGGTTGTTCAACTTGACGAATTCGTTTAAACTTAGTAGAAGAAAAGAATTCCTTAGTTAATTCAAAATCCGTGGCTAAATTAACAGAATTAGACTCCAAAAAAATTGCTTTTAGAGCGATTTTGGAAAATGGAACAAAGCTGGTTTTCAAGACTAATGCGAAGAATCAGGAAATGGGTGAAACGTGCTGCAGCGTGGTTATTGGTATTTTACTTATAGAGATTTCGGTATAATACGGAAGCGCATTTAGCAATCTTAAAATGCAATAACGGGACTAAAGAAAGTTAGCCAGGGTAGGGTTGTGACTGTCAGACCGAAGTGCATCAAAATTCTAAGATGCTAAAGGGCAACTCAACTTTTTCAAAC	-
RPS21A	S_Cerevisiae	0.909373	0.00407087	TTGCACATATAAAATATCTATCACTATGTATATCTTTCTAGAGTAAATGTCTTCCTGTACTTTTAAATCCGTACATTTTGAAAATTGAAAATGTATCTCAGATTCATTTTTCAATTCGAAATGAACGAAAATTACACTAAAAAGGTAACGTGTAGAGTGATATTATGCACAACGATTTTTTGAAAATTTCATATACGTTATTCTAATGTTTAGTAGAGAGTTTAGCGGAAGATATAAGGTGATCAGGCGTAAATTAACCACATACAAACCATAGAAACATCATACCAAA	TTGCACATATAAAATATCTATCACTATGTATATCTTTCTAGAGTAAATGTCTTCCTGTACTTTTAAATCCGTACATTTTGAAAATTGAAAATGTATCTCAGATTCATTTTTCAATTCGAAATGAACGAAAATTACACTAAAAAGGTAACGTGTAGAGTGATATTATGCACAACGATTTTTTGAAAATTTCATATACGTTATTCTAATGTTTAGTAGAGAGTTTAGCGGAAGATATAAGGTGATCAGGCGTAAATTAACCACATACAAACCATAGAAACATCATACCAAA
RPS21A	S_Paradoxus	1.09134	0.0204685	ATGCACATATAAATATCCTTCAGTATGTATATATTTCTTTGGAAGAATGAACTTCTTCCTGTATAATTAAATCCGTACATTTCGAAAACCGCAAACTTTTCTAAGATTGATTTTCCAATCTTAGAATACGAGAAAAAGAATAAAACATTGACGTGTAAAGTGATATTCTACGCAACGATCTCATGAAAATTTCATATACGTTATTTCAAAGTGCACTCTAGGATTGTGGTAGTTAATAAGGTGATTAGGCGTAAATTAATCACATAAAAATCATAGAAAGATCATACCAAA	ATGCACATATAAATATCCTTCAGTATGTATATATTTCTTTGGAAGAATGAACTTCTTCCTGTATAATTAAATCCGTACATTTCGAAAACCGCAAACTTTTCTAAGATTGATTTTCCAATCTGGAGAATACGAGAAAAAGAATAAAACATTCACGTGTAAAGTGATATTCTACGCAACGATCTCATGAAAATTTCATATACGTTATTTCAAAGTGCACTCTAGGATTGTGGTAGTTAATAAGGTGATTAGGCGTAAATTAATCACATAAAAATCATAGAAAGATCATACCAAA
RPS21A	S_Mikatae	1.14474	0.020885	TTGCACTATAACAATCAAATATGTACATTTTTGGAATAATAGACATCTTCAAGTATATTTAAATCCGTACATTTTGGAAACCGGAAACTTTTCTCAACTTCTCCAGTTTAAAATGAAAAGAATAGTTTAAGGAAATTACGTGTATAGTGATATTGGATGTAACGTTTTCTTGAAAAATTCATATACGCTATTTGAAAGTGTAGCCTGGAATCGTGGTAGTTTATATTAGGTGACAAGGCATAGTTTGACCATATAAGAACCATAAAAAGATCACACAAAA	TTGCACTATAACAATCAAATATGTACATTTTTGGAATAATAGACATCTTCAAGTATATTTAAATCCGTACATTTTGGAAACCGGAAACTTTTCTCAACTTCTCCAGTTTAAAATGAAAAGAATAGTTTAAGGAAATTACGTGTATAGTGATATTGGATGTAACGTTTTCTTGAAAAATTCATATACGCTATTTGAAAGTGTAGCCTGGAATCGTGGTAGTTTATATTAGGTGACAAGGCATAGTTTGACCATATAAGAACCATAAAAAGATCACACAAAA
RPS21A	S_Bayanus	1.23587	0.01597	TCGTATATATATGCAGGTATGTAGAAATACGTATATATTTCAAGAGAATCGGACCTGTCCCTGCAGTATACAAAATCCGTACATTTTAAGACCCAGAAACCTTACTGTATATATATATATATTCTCGCACTCCAAGGTAGAAGAGTAAAGTGTAAGGAAAAAAACCCGTGAAAGGTGACATTGAACCTGGCATTTTCTTGAAAAATTCATATACTCAATTTCAAATTATGGTCTTGAGACTGCAGTAGTTAATATTAGGTGATAAAGCGTTAAATAAACCATATAATAACCACAAAAAGACCATACCAAA	TCGTATATATATGCAGGTATGTAGAAATACGTATATATTTCAAGAGAATCGGACCTGTCCCTGCAGTATACAAAATCCGTACATTTTAAGACCCAGAAACCTTACTGTATATATATATATTCTCGCACTCCAAGGTAGAAGAGTAAAGTGTAAGGAAAAAAACCCGTGAAAGGTGACATTGAACCTGGCATTTTCTTGAAAAATTCATATACTCAATTTCAAATTATGGTCTTGAGACTGCAGTAGTTAATATTAGGTGATAAAGCGTTAAATAAACCATATAATAACCACAAAAAGACCATACCAAA
RPS21B	S_Cerevisiae	1.72283	0.0187667	GGCTTGTGTCCGCTGGTCTGGTAGGTTTGAAGAATTTCCTCTACGTGATGGTTGTATGTAAACAAACTTTCTTAAACTCTGCTTTTTCTTACTGCCCTTATAATGTGACGACAACTTTAGCGCAAGGTGAGGGAAAAACAAAACAGCCAAGCGTAGTTCAGTCACATGATAAAGGCAGTAGTTCAATTTGGTACTAAGAAACATTTTTTGCAACATTTTTGCCTTGTTATTCGTGAAATGAATATCTGGCGATATTTTGCACATATTTGGTTCCAACAATAGCTGGTTGAACATACATCTACTTAAGTTCTCTCTTCTTTTTTTTTCTCTTTCACTTTTCTACATATGTACTGTTGCCATAGTAACGTAAATTATGTAAAATACTTATCCGCATCAGGG…	GGCTTGTGTCCGCTGGTCTGGTAGGTTTGAAGAATTTCCTCTACGTGATGGTTGTATGTAAACAAACTTTCTTAAACTCTGCTTTTTCTTACTGCCCTTATAATGTGACGACAACTTTAGCGCAAGGTGAGGGAAAAACAAAACAGCCAAGCGTAGTTCAGTCACATGATAAAGGCAGTAGTTCAATTTGGTACTAAGAAACATTTTTTGCAACATTTTTGCCTTGTTATTCGTGAAATGAATATCTGGCGATATTTTGCACATATTTGGTTCCAACAATAGCTGGTTGAACATACATCTACTTAAGTTCTCTCTTCTTTTTTTTTCTCTTTCACTTTTCTACATATGTACTGTTGCCATAGTAACGTAAATTATGTAAAATACTTATCCGCATCAGGG…
RPS21B	S_Paradoxus	1.57925	0.0439376	GGTGTGTGTCCGCTGGTAGTTGGCTTATAAATTTCCTCTACGTGATTGCTGTATGTAAACAAACTTTCTTAAACTCTGCTTTTATAATGTGAGGACAACTTTAGCGCAAAGTGAGGGAAAAACAAAAAAAGCCAAGCGTAGTTCAGTCACATGATAGAATGAACGGTCCAATTGGTAACCAAAAAAGAAAATTTTTTGACAATTTTTGCCCTGTTGTTAATGAAGTGAACACCTGATGATATTATGCACACATTTAGATTCAACAGTACGCGGTTAAAGAAAGTTCTGGTCTACTTTGCTTCTTCTTTCGTTTTTTTACACATATGCCGTTGCCATGGTAACGTAGATTATGTAAAATGCACATCTGCATCAATGATTTGAGGGTCGAAAACATAGGTT…	GGTGTGTGTCCGCTGGTAGTTGGCTTATAAATTTCCTCTACGTGATTGCTGTATGTAAACAAACTTTCTTAAACTCTGCTTTTATAATGTGAGGACAACTTTAGCGCAAAGTGAGGGAAAAACAAAAAAAGCCAAGCGTAGTTCAGTCACATGATAGAATGAACGGTCCAATTGGTAACCAAAAAAGAAAATTTTTTGACAATTTTTGCCCTGTTGTTAATGAAGTGAACACCTGATGATATTATGCACACATTTAGATTCAACAGTACGCGGTTAAAGAAAGTTCTGGTCTACTTTGCTTCTTCTTTCGTTTTTTTACACATATGCCGTTGCCATGGTAACGTAGATTATGTAAAATGCACATCTGCATCAATGATTTGAGGGTCGAAAACATAGGTT…
RPS21B	S_Mikatae	1.38927	0.0167112	AGTTTATGTCCACTTATCTTGCTTGGCTCAAATGGTTCTCTTAACACAATTGTTGTATGTAAACAAACTTTCTTTACTCAAGTTTTTCTCGCTGCCCTTATAATGTGAGAACAACTTTAGCGCAAAGTGAGGGAAAAACAAAAAGCCAAGCGTAGCCCAGTCACATGATAAAAATAACAGGCCAACCAGAAACCAAAAAACTTTCTTAACAAACATTTCTATCCTTATATGAAATGAGAAACATGGTAGTGTTTTTTTGCACACTTTTTTATTTACAAAAGTACAGGGATTTAAGAAAGCTCCGCTTGGTTTCCTTCTTTAGTATATCTATACGGTTGCCATGGTAACAAAGATTATGTAAAGCGTGCACCTGCATCAGCGACTATAAGTCCAAAGCAT…	AGTTTATGTCCACTTATCTTGCTTGGCTCAAATGGTTCTCTTAATACAATTGTTGTATGTAAACAAACTTTCTTTACTCAAGTTTTTCTCGCTGCCCTTATAATGTGAGAACAACTTTAGCGCAAAGTGAGGGAAAAACAAAAAGCCAAGCGTAGCCCAGTCACATGATAGAAATAACAGGCCAACCAGAAACCAAAAAACTTTCTTAACAAACATTTCTATCCTTATATGAAATGAGAAACATGGTAGTGTTTTTTTGCACACTTTTTTATTTACAAAAGTACAGGGATTTAAGAAAGCTCCGCTTGGTTTCCTTCTTTAGTATATCTATACGGTTGCCATGGTAACAAAGATTATGTAAAGCGTGCACCTGCATCAGCGACTATAAGTCCAAAGCAT…
RPS21B	S_Bayanus	1.40871	0.0479032	GCTTTGTGTCCACTGCTCTGGCTTATAGAGATTTCTCCTTTTATGAGTACATATCTAAACAAACTAATTTACTTGCTTTTTAGTTTTTCTCAGGGCGCTTTTAATGCAGATAGCACACGTTAGCGCTAATTTCAGGGAAAAAACGAAAAAGCCAAGCATAACTGAGTCACATGATAGAAACACTAGATCCGCCGCAAGCCAAAAGAAAAAAACCTCATTTTAACACCATCATCCCGTACTATCAATGTACGGAACTTATCCTAAGTGTTGTGTGCATTAAGTATCGACGGTGCGAGATCAAAGTGTTTCTATCTTGCCTTCCATACATGTTGTTGCCATGGTAACCGCACAGAGGTGGAGTTATACCCACACCAACAAGTTCAGCAGCAATGTGTGCCA…	GCTTTGTGTCCACTGCTCTGGCTTATAGAGATTTCTCCTTTTATGAGTACATATCTAAACAAACTAATTTACTTGCTTTTTAGTTTTTCTCAGGGCGCTTTTAATGCAGATAGCACACGTTAGCGCTAATTTCAGGGAAAAAACGAAAAAGCCAAGCATAACTGAGTCACATGATAGAAACACTAGATCCGCCGCAAGCCAAAAGAAAAAAACCTCATTTTAACACCATCATCCCGTACTATCAATGTACGGAACTTATCCTAAGTGTTGTGTGCATTAAGTATCGACGGTGCGAGATCAAAGTGTTTCTATCTTGCCTTCCATACATGTTGTTGCCATGGTAACCGCACAGAGGTGGAGTTATACCCACACCAACAAGTTCAGCAGCAATGTGTGCCA…
RPS22_v1ha	D_Hansenii	0.382543	0.0118028	CTTTTACTAATTAATTATACTATGTATTCGAATAACAGTAATGTAAAGATTCTTTTTCTCAAAAGTTTTTCACCAGCCGAACGGGATGAAGAACACCATGCGAACATGCCACAAAACTCCAAGCCCAAACACCCATATTAAACAAAGAGAATGCCGATTCTGTAAAAATTCGCAGTAGCGCGCCCACCATAATTGTGACTGCTAAATAGATTTAGCGACGATATCTAAAGACATTGTCGCGGGAAAAGTCGCTCACCGCGACCCACTAGCGGGTTCTACCTATTACACAAACAGAATGGCAGGAGCGAGCACCTAACAAATTTTCAGACCCGTATTCTCATAACCCGGACCTAGTAGTGAGCGAGCACTAGCACTAGTTGAAAAAAAAAAAGATAATTT…	-
RPS22_v1la	K_Lactis	0.315944	0.00455229	ATCTATTATTAGTCCTTAAATTCCAAAAACTTATGCCCTCATCCATATCATCAAAGTTTGTTTCGTTTCATTTCATTCCTTAGACAGTTCATCTGCTCGGTTTATCGTTATTTTCCTTTCAATAATTACGGTATATCTTTATTCATTCTCTGATTATCAAACAATAGTCCAAGTTGCCCCATTATTAACCATTTCAGCACTATTTCGCTTGTTAACATACAGCCATTGTTGATTCTTATCCTTGGTTCTTTAAGACAACAAAAAGTATATGTCTGAACTAACAAATAACCCAAGTAGTATTATATAACGAATATTTCTAATATCTAAAGGCTGATACTATTCAAGGTGGTTCCTAGAAGTTGACAAAATCCACTACAATTGACGGTGAGAGACTAAGGA…	-
RPS22_v1li	Y_Lipolytica	0.0887149	0.00465306	TGTTATTTGTCGTTGTCAATCTTGTAAAAAACCAAGGTTGATTTGAGGATTTTTGCGTGTGCGGTTGGGAGGTCCTGGTGAGTGCCAACCCTAGTTTTGGTCATGTGACGTGACTGTGAAAACTCTGGGATTTTTCGACGATGCACAACCTTAACCTTATTCGACACACCTCCCAACACTGGCAAAAATATCGCCCCAAAGTGTTTTTACACTCCATCTGCAAAA	-
RPS22_v1po	S_Pombe	0.0116752	0.00397682	TATGAAAGCTCAAGTAATAATAAAGTGATGAGCCCTCTTAGTGGTTTACTCCATATGTTATAATTTTGCAAACTAAATTGGTTGTTTACAATGTCATGACTTTAAAAGTAAATTATTAACCGACAACTTCATAATCTACGCTATTTTTGTTTTGTGAAATTTTACGAAAATGTCAATATATTTGTTAAAATATAAACGTAAGGATGTAGCTGTAACTCTTCATTAGTTTTGCATTTCAAGAAAGTAAATCGCTCACAGAATAAAAAGACGAAGAAAATTTTTGTTTTCTTCTTTCATTCATTTAATTACATCAAATTGTATTTTTCTTGACCGAATTTTATCTAATGACCATTCAAAATATAAGGAAATATACATATTATGCCCTAAAGTACGTTATGT…	-
RPS22_v2ha	D_Hansenii	0.0177054	0.00832759	TGATTGCGATTCTCTCCAACTGTATGATCAACTCTAATATGTAACAAGCCCATAGAATATATACCACTAAGCTTATCTAGTAACTAGCATTTTGCCATTTTTCTTTAAATTCACGTGACAAATATATCGTATTGAAATTTACTTAGAGTCAGCGTAAATTTAGTCATTATGGAAAGTGGTGAAAATTTTTCAAAACCCTACTGGAAGAAGATAGTATTTTACTCTTTATATAGTTTTATACTAATTTTAAAGTTTCGACAATCATATAAACAAAATAAGGTATGTTTTACTGAATACCATCGATAAAGCTACCATGAAATTTCCAAAAATACTTCGACACTTGGACCAAGGTGTCTTGAATTATTTCCAATCATACAGGTATTAATATGAGAATCTAAT…	-
RPS22_v2kl	S_Kluyveri	0.436828	0.00550843	CAACGCAGAAAGAAAAAGAAATTTTAAAGGAGATTAACAAACCATCAATAATCACTACAATAATTTAAGGGAGCCAACCATCTAATCTTGGCGGCATTACATCACCTGGTCAACCACCATTTTCCTGGAGTCATGAACGGCTATCACCAAGACAATTGATAAATAAATAAAATGACAACACATGGCGGGTGTCTAAATAACAACAATCCCTTAAACTAATTAATCTTGCAAAAGAAAAGCAGGCAAAGGACTCAGATTCTCTTTACGATTCAGAAGCAATTCTATCCATTTAATTAATCACCTGAAACTATTTAGCTTATACAATTGTCCGGGTAATGAGACGATTCATAAAAACCAGTACACCACAGATAACATTTTTTTCACTACTTATAACATATA…	-
RPS22_v2la	K_Lactis	0.999254	0.0297926	GAAGATTCTATCCTCTTTATATAAACTTTTCAACGTTAGTTCAACTACACAATCCCAATTTTTCACCCCCACACTTTGATCTACCATGAATCATTAGCCATGTACCAGAAACACTAGAAATACACATCAATACCCAACAAATCAGTCATTCAACCATCAAAAATGCATACTACTTAGGCCCTTTGTCAATTCTCTATTTCCTTTACTAAAACAATGTAGTGCTCCAAGCTTTATCAAATTTTTTTCGCCGAAACTTTCTTTTTGACATTTTTTTGCTGCTTCAAGAATTTCTTTCCCTCTGGAAAATGAGTCTCACCGACATGACTCAAGAGACTAAAAGGCTAGAAAATGCGGTACGGATCCCCCAATCACTTTGGAAAGACTCACAAGAGTCCCTTA…	-
RPS22_v2li	Y_Lipolytica	-0.000322445	0.00747893	AGAGGTGGTGAAGGAAACAACAGCATTTAATTTATATATTTAATCATAGCACGAAGGCGCGAGATGCAAGGATCCCAAATTCCTTCGGATCTAATTCACTCGTCATATATAATAGATTTTACTTGTAATTATAGCTATCATATCTGATATTTTGATTCTCAAAACCACAATACTCCAAACCATACCCTAACCGCACCACCCAAATTCAAACAAAAGACCCTAACGCAACTCAAACTCCCAAGTTACCCTGTCTGAAAAATTCTCTCTTATAACACCACGTCACTTCCCTCCTTTCTCCTCTTAATTACACATCACCAAACGTATGTACTTCACTGCCCTCGTTTTACCTCACTAGAAAATCGTGGTTATGTGTTGAATCTGTTTATGGAAGACGGTGGT…	-
RPS22_v2po	S_Pombe	0.00862092	0.00547484	TAGGGAATTTTTTTATTTGCGTCGAAAATCTCTTAATATTACAGTAATTTAATACCATGATTTTATGTCTCCTACTTATGCTTATTGTGTTTGAGGAAATACAAATTTTGTAAAGTATGGCAATTCAATACTAAACGTCTAATATTCTATATAAAGTAATTTCCCCTTGGTATATTAAAACATTGGAATTCCGTACAGTTTAAGAGAAACACTTTATTTTTAACCGTATATGCCCTTCAGGTTACATTTCTAAAGTTTCTATTATTTTGAAACTACCCAAAGTCAATCAAATCAGTACTGAGTTAAATAGGGTAGGGTTTTTATGTGACTGCTCCTGTAGATACAAAACAAGCATTTCGCGAAATTGCAAACTGTTTTTACCACCTACAGTTTATAAAG…	-
RPS22A	S_Cerevisiae	1.52823	0.0284871	GTTGATCTATCTGTGTTTATTTGCTTGTCTTTTTCGAATTTTCAGTATAATATGAATGTACCAAAAATTGTAGAAAGTATATTAAGTAGAAGTTTTAAAGTATCTATCAAGGCGAAGAATAATTCTCGGTTCTCGACAGCCCAAAAGCCGAATTGCGTTAGTTAGCCCACGCGCGAGCGTAAACGCAAGGACCATTGAGCTTGGAACAGAAGGAGTCGCTTCGGCGTCCCCGCCAAGGCGTACTGTTTGCCTCGGCCTGCCGCGTGGTGGTGGTAGTTTGAGCCGGAGCCTAAAACGCCCATAAGTTTTTTGAAAATCAAGCTAAAAAATGAAAAAAAAAAAAAGTTAAATTGGTACTGTGCGCCCATACATCACATACTTAAAAGTGTGTAATTCCTC…	GTTGATCTATCTGTGTTTATTTGCTTGTCTTTTTCGAATTTTCAGTATAATATGAATGTACCAAAAATTGTAGAAAGTATATTAAGTAGAAGTTTTAAAGTATCTATCAAGGCGAAGAATAATTCTCGGTTCTCGACAGCCCAAAAGCCGAATTGCGTTAGTTAGCCCACGCGCGAGCGTAAACGCAAGGACCATTGAGCTTGGAACAGAAGGAGTCGCTTCGGCGTCCCCGCCAAGGCGTACTGTTTGCCTCGGCCTGCCGCGTGGTGGTGGTAGTTTGAGCCGGAGCCTAAAACGCCCATAAGTTTTTTGAAAATCAAGCTAAAAAATGAAAAAAAAAAAAAGTTAAATTGGTACTGTGCGCCCATACATCACATACTTAAAAGTGTGTAATTCCTC…
RPS22A	S_Paradoxus	1.60792	0.0108467	GTTGATCTATCTGTGTTTGTTTGCTTATGTTTTTCAAATTCTTAGTATAATACGAATGTACCAAAAAATGTAGGAAGTATATTAAATACAAGTTTTAAAGTATCTAGCAAAGCGAAGAATAATTCTCCCTCTCAAAAGACGAAAGCCGAAATTGCGTTAGGGAGCCCGTGAGCGAGCGGGAACGGAAGGGAGTCATTGGGCTTGGAACAGTAAGGATCGCGTCGGTGCCGTAAGGTCTGCCTAAGGATCGCCCCCCTGGTGGTAGTAGTTTGAACCGAAACAGTTGAAAGTTGATTGAGCCTAAAACGCGCCGAATCTTTTGAAAATCTCACAAAAAAAAATGAAAAAAAAGCAAACAAATTGGTACTGTCCACCCATACATACCATATCTAGAAGCGT…	GTTGATCTATCTGTGTTTGTTTGCTTATGTTTTTCAAATTCTTAGTATAATACGAATGTACCAAAAAATGTAGGAAGTATATTAAATACAAGTTTTAAAGTATCTAGCAAAGCGAAGAATAATTCTCCCTCTCAAAAGACGAAAGTCGAAATTGCGTTAGGGAGCCCGTGAGCGAGCGGGAACGGAAGGGAGTCATTGGGCTTGGAACAGTAAGGATCGCCTCGGTGCCGTAAGGTCTGCCTAAGGATCGCCCCCCTGGTGGTAGTAGTTTGAACCGAAACAGTTGAAAGTTGATTGAGCCTAAAACACGCCGAATCTTTTGAAAATCTCACAAAAAAAAATGAAAAAAAAGCAAACAAATTGGTACTGTCCACCCATACATACCATATCTAGAAGCGT…
RPS22A	S_Mikatae	1.5472	0.0317631	GTTTATCTATCTGTGTTTGTTTGCTTGGGTTCTTTAATAACTTGTATAAAAACGAATGCACAAGAAGGGGTAGGATATATATCAAGTGTAAGTTTTAAAGTACCTAGCAAAGCGAAGAATAATTCTAGCTTCTCGGCAGACCAAAATCGGATTGCGTTAGCAAGTAGGAGGGACCGAACGGGAATCTTTCGGTCTGAGACGAGAAAAATTCATTTTCTTTCCGCTACTGAAACGGAAGGTCTGCCCAAGGCTTCCCACTAGTACAAAATGTGTAGGCCGACACTGTTAAAATCTCGCTAAAGCAATAAGCGGGCCGATTTTTTGAAACAATTCCAGAAAATATCAAATAATAGCAATAAAGTTGGTACTTTTCACCCATACACACCATAGATAAATGTA…	GTTTATCTATCTGTGTTTGTTTGCTTGGGTTCTTTAATAACTTGTATAAAAACGAATGCACAAGAAAGGGTAGGATATATATCAAGTGTAAGTTTTAAAGTACCTAGCAAAGCGAAGAATAATTCTAGCTTCTCGGCAGACCAAAATCGGATTGCGTTAGCAAGTAGGAGGGACCGAACGGGAATCTTTCGGTCTGAGACGAGAAAAATTCATTTTCTTTCCGCTACTGAAACGAAAGGTCTGCCCAAGGCTTCCCACTAGTACAAACTGTGTAGGCCGACACTGTTAAAATCTCGCTAAAGCAATAAGCGGGCCGATTTTTTGAAACAATTCCAGAAAATATCAAATAATAGCAATAAAGTTGGTACTTTTCACCCATACACACCATAGATAAATGTA…
RPS22A	S_Bayanus	1.34606	0.0175217	GTTTGTCTATCTGTGTTTGTTTGCTTATTATCTTTAAAAATTGAAAAATATACTAATAAATTTAAAAATGTAGCAAGTATATTAAATACAAATTTTAAAGTATCAATCAGAACGGGGATGAACAGTTCTCAATTTCCGATACGTATAATTGCGTTAGTGAGGCCCGGGAAGGGATCGCTTTTGCCCGGGGCGGGGAGTTGCCTTGGTTCCAACAGGAAGAGGGATTCTCTGCCTAAGTTTTCCCTTTGGAGAAAGTTTCCTGGGCCGACGCTGCTCGAAGCGGGCTGGAGCAAAAAACGAGCTGCATCACGTCTAGTTTTAAAAAAAAAACAAGAAAAAAAACAGCTAAATATGTCCCGTTAACCCACACACTGCACTTATAACTATGTACATATATTT…	GTTTGTCTATCTGTGTTTGTTTGCTTATTATCTTTAAAAATTGAAAAATATACTAATAAATTTAAAAATGTAGCAAGTATATTAAATACAAATTTTAAAGTATCAATCAGAACGGGGATGAACAGTTCTCAATTTCCGATACGTATAATTGCGTTAGTGAGGCCCGGGAAGGGATCGCTTTTGCCCGGGGCGGGGAGTTGCCTTGGTTCCAACAGGAAGAGGGATTCTCTGCCTAAGTTTTCCCTTTGGAGAAAGTTTCCTGGGCCGACGCTGCTCGAAGCGGGCTGGAGCAAAAAACGAGCTGCATCACGTCTAGTTTTAAAAAAAAAACAAGAAAAAAAACAGCTAAATATGTCCCGTTAACCCACACACTGCACTTATAACTATGTACATATATTT…
RPS22B	S_Paradoxus	0.307552	0.00680717	ACTCGAGTTATCCTTGAAGCATCTCATTTACATGTTCCAAGAAATGTAGCTGTTCGAAGTTTAATTTTTTTTTACTGTCATAAACATTAAACAAACATGATCCGTCTTCTATCTCGCAACTCAATGCTCACAAAGTGCAAACAATGCAACACTTTGTTTCTAAATCCAGTCACTGAAAGACTTTCAATAAAAGCTCATATCATTATTCTTTATGCATTATATTGCTGGTAGAGTACATAGAACCCTAACTGAAATAAATGTTACCGTCAAAAATGACTGACGCAACTTTTTCTCAAATTTTTCTTTTCATTTGTCTTGAAAAGTTTTCTGCATTGAATAAATTGTTCTCTACTCTGAATATTGCTGCTATTCATATTTAGACTTCCGCATAATCAAAGT…	-
RPS22B	S_Mikatae	0.221477	0.00653399	TGACAGTACGACAATTGATCATTACATATTATCTTTTCTTCAAGAGATCTCTCTCCAACTAACAGCCTTTCAAGCAGATAAGGGCGTCCAAAGCACACTCACATATTCTGGGTAATCCTCTTTGTTATAAGCAAAAGTTTGAATGATAGAAGTATACTTACCTCCTACTTTAGCCTTCAAACTTCCTTTCTTCTGCGGTCATTCATACACTTCATTGCCTTAGAATTCGTCAAACCCTAACTTTATCAGGCAAAAATGACCGTTACAAGTGATCGACGCATGTTTTTCAAAAGCTTTTTTTTTCACGTTTTTGAAAAGTTTTCTCTTTCATACAAATTGTCTCACTTCTTTGACTTTTTTCCATATATTTGAAACTATTTCCACCTAAAGAAGCCAAGC…	-
RPS22B	S_Bayanus	0.198794	0.00530914	CGTTTTTCTGCTTCGTTTTGAGTGGTATGGTTCTGGTAAAAAAATTAGTACCACTTCTGTGAGTCCTTGTACTAATATATATTTAGAGTCATGCAGGTACCAACACATGCGCGATTACGATAACACCTGACTCGTAATCATACCGTAGTCCTCTATGCATTACATGTTCTTGACATTCACAAGCCCTAACTAAAACTTACAAAATCGTTAATGATGACCGACGCAACTTTTTTTTTTTCAGAAAGTTTTTTTTCATCTGTCTTCTAATAATTTTCAACATTGGATGGAATAAATAAATATGATCATACTTTTCCTCTCAAAATTTTATTTCAAGAAGGTATATACTTTTCCGAATAACTAACAAGCAAACAAAATTCAACAGTACCATACTAATAATAA…	-
RPS23	S_Kluyveri	1.7342	0.0487339	TGATATCAGAATTGATTCTTAGTCGGAATTGAGTTTAACAACCATTCCAGAAGGCCTTCGTACCAAGGTCTCTCTCTCTCTTTGAATGATTATGTAAGAAGCTGCACCCTAACATCAAATTCCTTTTCGTTTGACTGATACATCCGTACATATGTTAAGGTATCACGATGAAAATTGATATCTAACACCCATACAGTCTAAAGTTGTGCATGAACCGCGCTCATGGACAAACTCCATGCGACGACATGGTAGACCACTGCCATCTTACACGCGGGCACTCCTCAAGAAGAAAACCTACCCACGCAGTGGCAAGGTGTGGAGTCCGCTGCGTCCAGCGCTGGGAGGGCTCCTCTGTCCACTTCGGACACTCTAGGCAGGAGGCCCACCGACCCCCGGCGC…	-
RPS23	K_Lactis	1.31126	0.0337291	AAAGAAACAATGAGGAAACAGTTTAAAGTTACTTTAATGCAAAGCTTTGTTTAGAAACAAAAAGGACGCTCAATTGGCTAGTCAGTTTATGAAAAACATGAATAAATTGACCATCCATGCATATGCTCAAGTATTGATGTGTAGTTATCGGTTTCATTTTAAGGTTTCCAAGCATCGATTGATGCCCTATCCATTCATTACCCACTGATCGAAAAACTCGTCACTCCACAGAGTTTGCTAATCACGTGCCGAACTTCAAGGGACTGGTGCATTCTAAAAAATTGTAAACACCCATACATAATGAAATATTTAATTACGAGATAGTTGAGGGTGTAATGTTTCCTAAATAGGAAAAATGCTCCAAAAGAAAAACGTACAGAACCCGATAGCAATAGACAA…	-
RPS23A	S_Cerevisiae	1.30758	0.0815494	GTCGGTCGCACTAGACTTTTCTTCTCACTGTCACTTACCTGTTTGAAATCATGTCCTTTTTTTTTTTGCCATTCTTATACATTTTCTTTCCTTCTGAAATTAACTGTACACCCATACCCTATATACACCCATACCCTATTTTTAAATATAAAAAGTAAACTTCATTTTGAAAGACCACTCTGCATCAGCACGCGGGCTCTGGAAGGAAGAAATGACGTTTCGGCGGAATACCCTTTCAGAAGGTCTGCTCTTGTGGCTGGTTCATGGGAGACACCCAGCGGAGCTCCTCCCGAGAAAGGCCCCTTCATCTCTGCCGATTGCTGACGGAAAGCAGTAGCGGAGGTTTGAGTTCTCTACGCCGAGAGTACACTGCCGTAATATCACAATGTTTCGACTAAC…	GTCGGTCGCACTAGACTTTTCTTCTCACTGTCACTTACCTGTTTGAAATCATGTCCTTTTTTTTTTTGCCATTCTTATACATTTTCTTTCCTTCTGAAATTAACTGTACACCCATACCCTATATACACCCATACCCTATTTTTAAATATAAAAAGTAAACTTCATTTTGAAAGACCACTCTGCATCAGCACGCGGGCTCTGGAAGGAAGAAATGACGTTTCGGCGGAATACCCTTTCAGAAGGTCTGCTCTTGTGGCTGGTTCATGGGAGACACCCAGCGGAGCTCCTCCCGAGAAAGGCCCCTTCATCTCTGCCGATTGCTGACGGAAAGCAGTAGCGGAGGTTTGAGTTCTCTACGCCGAGAGTACACTGCCGTAATATCACAATGTTTCGACTAAC…
RPS23A	S_Paradoxus	1.42576	0.0706199	GTGCTCTTACCGGACTTTTGTTTCTCGCTGTCACCTGTTTGTTCGAAATCAGGTCCTTTTTTTGGCATTCTTATATATTACTTTCCTTGAAAATTACATTACACCCATACATACAATACCACCCACACCTTGAACGCTAAAAAATGAAAACTTTGCTTTAGAAGACCTTTCGGGATTACGACGCGGGCTCTGGAAAGGAGGATATGACATTCAGGCGGAACATCCTTCCAGAAAGTTTACTCTTGTGCGTGCTTCATGGAACAGCACCAAGCAGAGCTCCTTCCAAGGCTGGCGCATCATCTCTGCCATTTGCTTACGAACAGCAGCAGCAGCAGTAGCAGCAGCGTTTGAGTTCTCTGTGCCGAGAGTATACTGCGGTAACATAACGTTTCAACTAAT…	GTGCTCTTACCGGACTTTTGTTTCTCGCTGTCACCTGTTTGTTCGAAATCAGGTCCTTTTTTTGGCATTCTTATATATTACTTTCCTTGAAAATTACATTACACCCATACATACAATACCACCCACACCTTGAACGCAAAAAAATGAAAACTTTGCTTTAGAAGACCTTTCGGGATTACGACGCGGGCTCTGGAAAGGAGGATATGACATTCAGGCGGAACATCCTTCCAGAAAGTTTACTCTTGTGCGTGCTTCATGGAACAGCACCAAGCAGAGCTCCTTCCAAGGCTGGCGCATCATCTCTGCCATTTGCTTACGAACAGCAGCAGCAGCAGTAGCAGCAGCGTTTGAGTTCTCTGTGCCGAGAGTATACTGCGGTAACATAACGTTTCAACTAAT…
RPS23A	S_Mikatae	1.66515	0.048922	GTTACTCTTACTGAACTTTTATTATTAAGTGACACATGCTTATTCTAGATCAAGTTTTTTTCTTTATATTGGATATTACTTAATATTGTTTCCTTTTTTTTCTTAATTTACACCCAAACCAATTTTTAGGACCCATACCTTGTTCATGAAAAATGAAATCAGCTGCTTTGAGTACCGCTCGGCATTACGATGCGAACTATAGGGAAGACACTCCCTTCCTTCCGGCGAAGGGCCTTCCAAAAAACCACCGTTTGCAGAAGCTTCCTGGGACAGCACCAACGAGAACTCTTCCTAATATTGGCGGAACTACTCTGGTGAGGTGCCCACGGCAGCAACGACAGGGTTTGAGTTCTCTGCGCCGACAGAATACTGCTATCATCTGATAATATTCAGCTAACG…	GTTACTCTTACTGAACTTTTATTATTAAGTGACACATGCTTATTCTAGATCAAGTTTTTTTCTTTATATTGGATATTACTTAATATTGTTTCCTTTTTTTTCTTAATTTACACCCAAACCAATTTTTAGGACCCATACCTTGTTCGTGAAAATGAAATCAGCTGCTTTGAGTACCGCTCGGCATTACGATGCGAACTATAGGGAAGACACTCCCTTCCTTCCGGCGAAGGGCCTTCCAAAAAACCACCGTTTGCAGAAGCTTCCTGGGACAGCACCAACGAGAACTCTTCCTAATATTGGCGGAACTACTCTGGTGAGGTGCCCACGGCAGCAACGACAGGGTTTGAGTTCTCTGCGCCGACAGAATACTGCTATCATCTGATAATATTCAGCTAACGG…
RPS23A	S_Bayanus	1.57728	0.0547104	ATTATTCACCTTGCTTCACTTCTTAACTGACGCTAGTCTGCTAAAAAACATGATACTTTTTTTGTCATCATAGAGCATATTAATTTCCTTCGTGCGTTTACATGTACACCCATAACCACTGAATAAAGCCCATACATACTGAAAATAAATATAAACTGTTTTATTTTTCAAAGTTTCCACGGGCCTTGCGGGATGAAGGGAAAGCTGCCCTTCTTGTGAGGAGCGCCCTCACAGGAGGTCACTGTCTGTTGGAGTTTCATGGGACGGAGCAGGCGGGACTCTCCCAGAGATTGGCGGATCATCTCTGGTAAACTGCTCGCGAGCGGTAGCAGCGGTCTGAGTGCTCTGCACCGAGGGTATACTGGTGTAGTCTTATAACGTTTCAGTCAATGGTCTCAG…	ATTATTCACCTTGCTTCACTTCTTAACTGACGCTAGTCTGCTAAAAAACATGATACTTTTTTTGTCATCATAGAGCATATTAATTTCCTTCGTGCGTTTACATGTACACCCATAACCACTGAATAAAGCCCATACATACTGAAAATAAATATAAACTGTTTTATTTTTCAAAGTTTCCACGGGCCTTGCGGGATGAAGGGAAAGCTGCCCTTCTTGTGAGGAGCGCCCTCACAGGAGGTCACTGTCTGTTGGAGTTTCATGGGACGGAGCAGGCGGGACTCTCCCAGAGATTGGCGGATCATCTCTGGTAAACTGCTCGCGAGCGGTAGCAGCGGTCTGAGTGCTCTGCACCGAGGGTATACTGGTGTAGTCTTATAACGTTTCAGTCAATGGTCTCAG…
RPS23B	S_Cerevisiae	1.64676	0.0570705	TCTCGAATCCTCCTGTCTCTTTCCTTGAATATTCTCAATGTTCCACTATCTTTCACATAAGCAATATTGTGAACTATATATACTTCATTAGATATTGCTTCAACATTAATATTAATAAAAAGGACATGCATAAAGTAACATCCGAACATCTCCAAACACCCATACATATTTATATTATCGACGAGGGAATTTTTTTCTTCCCAGGCCCACCAACGTGCGCCCACCGCTATGTTTTTTGCGCCTAGGTAGGTGGGCTAGCTTCTATGTATCAAAGCTCCTTCTGCGCAGCCGAGGTTTTGCTAAGCACTACCGCATTGGAATGACTGTGTTTGTAGGAGCTCCTTGTCTCCACGCTTTCGCAATTTTCAAGATCGAGATACTATTAGTGATGGTAAGGTT…	TCTCGAATCCTCCTGTCTCTTTCCTTGAATATTCTCAATGTTCCACTATCTTTCACATAAGCAATATTGTGAACTATATATACTTCATTAGATATTGCTTCAACATTAATATTAATAAAAAGGACATGCATAAAGTAACATCCGAACATCTCCAAACACCCATACATATTTATATTATCGACGAGGGAATTTTTTTCTTCCCAGGCCCACCAACGTGCGCCCACCGCTATGTTTTTTGCGCCTAGGTAGGTGGGCTAGCTTCTATGTATCAAAGCTCCTTCTGCGCAGCCGAGGTTTTGCTAAGCACTACCGCATTGGAATGACTGTGTTTGTAGGAGCTCCTTGTCTCCACGCTTTCGCAATTTTCAAGATCGAGATACTATTAGTGATGGTAAGGTT…
RPS23B	S_Paradoxus	1.81835	0.0257866	TATTGAATCCTCTTATCTATTTCCTAAATATTCTTAATGTACTACAATCTTTAATATAATTTCAAATTGTGAATTATAGTTAGATATTGTTTTAGCGTTCTAATTGAGAAAGAGAAGACATGCCTGATGTAACATCCGAACATTCCGAAAAGCCCATACATATTGAAACCTCCTTTACAAAGAAATTTTTTTTCCTTCCCAAACCTACCCATGTTTTGCGCCCACTAGTATTCGTTCGCGTACAGGCTGGTAGCCTGGCCTCTACGAATCTCGGCTCCTTCTGTACAGCCGAGATTCTGCTAAGCAGTGTTGCGTTGGAATGACTGTGTTCGTAGTAGTTCCTTGTCTCTACGCTTTCGCAATTTTCAAGATAGAGATACTATTAGTGGTGGCAGTATT…	TATTGAATCCTCTTATCTATTTCCTAAATATTCTTAATGTACTACAATCTTTAATATAATTTCAAATTGTGAATTATAGTTAGATATTGTTTTAGCGTTCTAATTGAGAAAGAGAAGACATGCCTGATGTAACATCCGAACATTCCGAAAAGCCCATACATATTGAAACCTCCTTTACAAAGAAATTTTTTTTCCTTCCCAAACCTACCCATGTTTTGCGCCCACTAGTATTCGTTCGCGTACAGGCTGGTAGCCTGGCCTCTACGAATCTCGGCTCCTTCTGTGCAGCCGAGATTCTGCTAAGCAGTGTTGCGTTGGAATGACTGTGTTCGTAGTAGTTCCTTGTCTCTACGCTTTCGCAATTTTCAAGATAGAGATACTATTAGTGGTGGCAGTATT…
RPS23B	S_Mikatae	1.53505	0.0786676	TTTTGAGTCCACTTATCCCCTTGCCATATATATTCTTGACGACTACAATCGTTAGTGTAATGCACTATTGTGTTGTAAAGTTTGTTCGATATTAATATGATGTGAAATTGGAAAAAAGAGTAGACACGCCGAAGATAACATCCGAACATTCAACCAAACCCATACATATTAGTATCTCTCTCTAAAAAAAAAGTATTTTCTCTTTTCAGTGCTTATCCAGATGTTTCCGTCGCTAGCCGTCCGCGCACAGACCGGCAGCCTGGCATCTATGAACGACCTTCCATCCTGTGCTGTGCAGAGGGGATCCTGCTAAGCAGTACTGCTTTGGAAGGACTGTGATTGTCAGAGCACCTTGTCACTGCCCCTTCGTAGTTTTCAAGATAGAGATACTATTAGTGG…	TTTTGAGTCCACTTATCCCCTTGCCATATATATTCTTGACGACTACAATCGTTAGTGTAATGCACTATTGTGTTGTAAAGTTTGTTCGATATTAATATGATGTGAAATTGGAAAAAAGAGTAGACACGCCGAAGATAACATCCGAACATTCAACCAAACCCATACATATTAGTATCTCTCTCTAAAAAAAAAGTATTTTCTCTTTTCAGTGCTTATCCAGATGTTTCCGTCGCTAGCCGTCCGCGCACAGACCGGCAGCCTGGCATCTATGAACGACCTTCCATCCTGTGCTGTGCAGAGGGGATCCTGCTAAGCAGTACTGCTTTGGAAGGACTGTGATTGTCAGAGCACCTTGTCACTGCCCCTTCGTAGTTTTCAAGATAGAGATACTATTAGTGG…
RPS23B	S_Bayanus	1.71628	0.0335522	TTTCACCGCCTTCGTATTCTTAACATACTATTGACAATGCAATCCTCAGCACTACGGCTCATGCCAATATCTTAGATTTAATGTTTTCTTATTGCTCGAAACTAACCTCACGTTGCATATTGAGAAAAAGGAAGCCATGTTACAATTAACATCCGGACATTCTTTGAAACTTCAAACAACCCATACATATTACTACAGGCCTGTTTTTTTTTTAGGAATGGTAAAAAGATTTTCCCCCAAAAAGAAAACCAGTGCGGGCTCTGCCCGTTTCCTTCCGCACGTTAGCTGGTGGGCTGCCGCGCTTCACGCCAAAGTCCTCCCTGGACGCATTACCAAGCCTTACTGGAGCTTCGTCATGGGAATTGCTGTGATCGTAGGAGCTTCTTGTCACTGCGCTTT…	TTTCACCGCCTTCGTATTCTTAACATACTATTGACAATGCAATCCTCAGCACTACGGCTCATGCCAATATCTTAGATTTAATGTTTTCTTATTGCTCGAAACTAACCTCACGTTGCATATTGAGAAAAAGGAAGCCATGTTACAATTAACATCCGGACATTCTTTGAAACTTCAAACAACCCATACATATTACTACAGGCCTGTTTTTTTTTTAGGAATGGTAAAAAGATTTTCCCCCAAAAAGAAAACCAGTGCGGGCTCTGCCCGTTTCCTTCCGCACGTTAGCTGGTGGGCTGCCGCGCTTCACGCCAAAGTCCTCCCTGGACGCATTACCAAGCCTTACTGGAGCTTCGTCATGGGAATTGCTGTGATCGTAGGAGCTTCTTGTCACTGCGCTTT…
RPS24	S_Kluyveri	1.1751	0.0419537	ACTTTTCAGTTTTTAAAGACAATTAATTATTCACGACAGCTTGTATAATAGAATAGCAATAAAAAGAACAACATTCTTATGATTAGTATCACACCATTTTTTATTTAGCACTAAGCTACTAGTGTTTCATGAAAAGATTTGCCCACATGCTAAATTCATGGAATATTAAAAGCTCATACACTATGGATCCCCACCTGCTAACCTCTGTACGATCGCAAGGGTGACAGGTTTTCTGTTTTCTTTTTTCTCGCAGGCCTGAGCTATATATTTGCAATCTTGTAAATCCACACTCACGTATATCGCATGATGCGTGACTTGTTAACCCATACATATGAAAGTAGTATTTCACCAAACTCCGTACACCGAGAATTTTTAGAGACGGAAAACGCAAGGAGGACT…	-
RPS24A	S_Cerevisiae	1.46063	0.0398913	TCAGGCCCGAGTTGACTGCTCATTGAAGGTATGTATGATAAACATTATAGAATAATGAAAAATGCCTCGTGACATACAGATAAAATCTAACAAGGATATATTCAAAAAAAAAAAACAAAACAAAAAAATAATAACGTGATAAACATTAATGAACAATGTATTTACATTCTTAAGCATAGGTGAGAAATTACCTTCTTTACTTTTTTTTTTTTTTTTGGTGATATTGTATATTAAAATATATAGTAATCAAATTCGTTTCATTGATCAAATTGCTCACTAGTTCTTTTTTCAAAAATTTCATCTTTATAGGTAGATACAAGTGCCAGAGAGATATATAAACAGAAAACTCTATCGATGTGATAATGTATGCCATTATCGGGACTGTACACCCACACATTT…	TCAGGCCCGAGTTGACTGCTCATTGAAGGTATGTATGATAAACATTATAGAATAATGAAAAATGCCTCGTGACATACAGATAAAATCTAACAAGGATATATTCAAAAAAAAAAAACAAAACAAAAAAATAATAACGTGATAAACATTAATGAACAATGTATTTACATTCTTAAGCATAGGTGAGAAATTACCTTCTTTACTTTTTTTTTTTTTTTTGGTGATATTGTATATTGAAATATATAGTAATCAAATTCGTTTCATTGATCAAATTGCTCACTAGTTCTGTTTTTCAAAATTTCATCTTTATAGGTAGATACAAGTGCCAGAGAGATATATAAACAGAAAACTCTATCGATGTGATAATGTATGCCAATATCGGGACTGTACACCCACACATTT…
RPS24A	S_Paradoxus	1.50619	0.0560449	TCAGGCCCGCATTGACTGCTCATTGAAGGCATGTATGATAAACATTATAGAATAATGAAGAATGCCTCGTGACATACAAAGAAAACCAAGCAAGGATATATTTTTAAAAAAGAAAACAGAAAAAAATAACGTGATAAACATTAATGAACAATGTATTTACATTCTTAAGCATAGGTGAGAAACTACCTTCTTTACAATTTTTTTTTTTTTTTTTTGTTGATAATGTATATTAGAGAACACATAGTAATCAAATTCGTTTCATTTATCAAACTGCTTACTAGTTGCTGTCTTGTTCGTCAAACTTTCAACTATATAGATATATGCAACTGTCCAAGAGATTAATAATACAAAAGACACCGTATGAGTGCGGCAATATTATCCGACACCTTACTGTAAACC…	TCAGGCCCGCATTGACTGCTCATTGAAGGCATGTATGATAAACATTATAGAATAATGAAGAATGCCTCGTGACATACAAAGAAAACCAAGCAAGGATATATTTTTAAAAAAGAAAACAGAAAAAAATAACGTGATAAACATTAATGAACAATGTATTTACATTCTTAAGCATAGGTGAGAAACTACCTTCTTTACAATTTTTTTTTTTTTTTTTTGTTGATAATGTATATTAGAGAACACATAGTAATCAAATTCGTTTCATTTATCAAACTGCTTACTAGTTGCTGTCTTGTTCGTCAAACTTTCAACTATATAGATATATGCAACTGTCCAAGAGATTAATAATACAAAAGACACCGTATGAGTGCGGCAATATTATCCGACACCTTACTGTAAACC…
RPS24A	S_Mikatae	1.70039	0.119739	TCAGACTCGCATTACCTGCTAATTTGAAGGCATGTATGATAAACATTATAGAATAATGAAAGATGCTTCGTGACATGCAGGGGAAATCAAACAAGGATATTTTAAAAATAATAAAACAAAAAAAAACAACGTGATAAACATTAATGAACAATGTATTTACATTCTTAAGCATAGGTGGGAGACTGCCTTCTTTACATTTTTTTTTTTTTTTTTTTGACAATTTATATGTGATAATATATATTAATCAAGAACGTTTCATTTGTCAGACTGTTCAGTAATTGTTCTCATCTTCGTTAAACTTTTAGCTTCATATATGCATTTTCAAGAGATTAATTAAGAAGCACTTCATGACTACCGCCAATACTGTCCGATACTTTGACAATAAACCCATACATTTTG…	TCAGACTCGCATTACCTGCTAATTTGAAGGCATGTATGATAAACATTATAGAATAATGAAAGATGCTTCGTGACATGCAGGGGAAATCAAACAAGGATATTTTAAAAATAATAAAACAAAAAAAAACAACGTGATAAACATTAATGAACAATGTATTTACATTCTTAAGCATAGGTGGGAGACTGCCTTCTTTACATTTTTTTTTTTTTTTTTTGACAATTTATATGTGATAATATATATTAATCAAGAACGTTTCATTTGTCAGACTGTTCAGTAATTGTTCTCATCTTCGTTAAACTTTTAGCTTCATATATGCATTTTCAAGAGATTAATTAAAAAGCACTTCATGACTACCGCCAATACTGTCCGATACTTTGACAATAAACCCATACATTTGGA…
RPS24A	S_Bayanus	1.45438	0.0406527	TAGAACTGCATTAACTGCTTAACGAAGATGTGTATGATAAACATTATAGAATAATGAAAACCATCTCGTGACATGCAGACAAGACAAAACAGAGCAACGAATATAAAAAAAGAAATCAAAAACAAAAAAAAAAACGTAACGTGATAAACATTAATGAACAATGTATTTACATTCTTAAGCATAGGCAAGACACTGCCTTCTTTTATACCTTTTTTTCCTTTCCTTTCAAGATAATGTATATGTAAAAATTATATACTAATAGAAAACATTTCATTTATCTAGCCATGAACTAATTGTCTTTCTTCTCTTTGAACCTCGACTTTGATCCAGTCAGGAAAGGAACAACACATATCATTACTGTTCCAAAGATTTCAAAATGATCGATTATACACCCATACA…	TAGAACTGCATTAACTGCTTAACGAAGATGTGTATGATAAACATTATAGAATAATGAAAACCATCTCGTGACATGCAGACAAGACAAAACAGAGCAACGAATATAAAAAAAGAAATCAAAAACAAAAAAAAAAACGTAACGTGATAAACATTAATGAACAATGTATTTACATTCTTAAGCATAGGCAAGACACTGCCTTCTTTTATACCTTTTTTTCCTTTCCTTTCAAGATAATGTATATGTAAAAATTATATACTAATAGAAAACATTTCATTTATCTAGCCATGAACTAATTGTCTTTCTTCTCTTTGAACCTCGACTTTGATCCAGTCAGGAAAGGAACAACACATATCATTACTGTTCCAAAGATTTCAAAATGATCGATTATACACCCATACA…
RPS24B	S_Cerevisiae	0.906735	0.0378335	CGATATACAAGAAAAAAAAAAAGTTCACTGATTACATATAACATAGTATAGTTTTCCCTTCATTCGTGTATTGTTATTATTTAACAATCTTATGAATATCACTGCTGTTGACAGTTGATTAAATCTGCTAAAGCATCAGCAATAAATAAGGTACTAGCTGTGCCTTCAGTAGGAATGATGTCCATAGACTTTTTTTTGATCAACTACATCTGTACATATTTTATTCCTTTTTCGGGAAACTGAATAACTAAAATTCGAAACTTTCTCTTCCGAAAAAATTTCCAGGCAGTATTCCCGTCTAGTTAATCACTCGGAAGGAAACAACGAGTGAGGTTTCGTGTCATTCTCTAGACGGAGCCCAGTGAGTCTACGTCCGTTTGGGCAGCCTGATCCTTTTGT…	CGATATACAAGAAAAAAAAAAAGTTCACTGATTACATATAACATAGTATAGTTTTCCCTTCATTCGTGTATTGTTATTATTTAACAATCTTATGAATATCACTGCTGTTGACAGTTGATTAAATCTGCTAAAGCATCAGCAATAAATAAGGTACTAGCTGTGCCTTCAGTAGGAATGATGTCCATAGACTTTTTTTTGATCAACTACATCTGTACATATTTTATTCCTTTTTCGGGAAACTGAATAACTAAAATTCGAAACTTTCTCTTCCGAAAAAATTTCCAGGCAGTATTCCCGTCTAGTTAATCACTCGGAAGGAAACAACGAGTGAGGTTTCGTGTCATTCTCTAGACGGAGCCCAGTGAGTCTACGTCCGTTTGGGCAGCCTGATCCTTTTGT…
RPS24B	S_Paradoxus	0.91109	0.0172217	GAATATATAAGAGAAGGAGAAAGTTCACTGGTTACATCCAATATAGTATAATTTTCTTCTCATTCGTGTATTGTTAATATATAACAGTATTATGAATATTATGCTTTTACATAGTTGATTGAACCTGACAAAAGCATCAGTAACAAGGTGCCGTTGATGGAAATATGTACAGCGACTTTTTTAGTTCGACTACATCTGTACATATTTCATTCCTTTTTCGGGAAACTACATAGCGGGAATCTCGAAACTTTTTCCTCACCAAAAATTTCCAGGCCGTAACACCCTGTTTAGCAAACCACCTGGAAGGAAACAATGCCGAAATCTCTTGTCACCGCCTAGACGGAGCCAAAAGAGTCTAGGCCAGTTTGGATGGCCTGGTTTCTTTGTTGGCTAGTTAGC…	GAATATATAAGAGAAGGAGAAAGTTCACTGGTTACATCCAATATAGTATAATTTTCTCCTCATTCGTGTATTGTTAATATATAATAGTATTATGAATATTATGCTTTTACATAGTTGATTGAACCTGACAAAAGCATCAGTAACAAGGTGCCGTTGATGGAAATATGTACAGCGACTTTTTTAGTTCGACTACATCTGTACATATTTCATTCCTTTTTCGGGAAACTACATAGCGGGAATCTCGAAACTTTTTCCTCACCAAAAATTTCCAGGCCGTAACACCCTGTTTAGCAAACCACCTGGAAGGAAACAATGCCGAAATCTCTTGTCACCGCCTAGACGGAGCCAAAAGAGTCTAGGCCAGTTTGGATGGCCTGGTTTCTTTGTTGGCTAGGTAGC…
RPS24B	S_Mikatae	1.12553	0.0296381	AGAATTCGAGAAGTAATAAGAGTACAGTGCAGGAGAAGGAAAACATACACTGATCATATATAATGCAATTTTTGTCTTCTTTTTATTCATACATTATTTTTTAACTGTTTTATTGAATTATATTTCTCAGCAGCCAACAGACAGTCATTGCCTCGTAATATACAACCGACTTTTTCAAAGATATTACATCTGTACATATTTTGATTCCTTTTTCGGGAAATTAAAGGCCGGCGAACTTCAAAATATTCTTATGCTGAAAAATTCTAGGCAGTAACATTCTGTTCGGGCGACTGCTTGGAAGGAAGCAATGTCGGTAGATTGCTAGTAATTCCCTAGGCAGGGCCCAAAGGATCAGAGGAGTCTGGACGGTATGCTCTCTTTATTGCCTTGGTAGCACTC…	AGAATTCGAGAAGTAATAAGAGTACAGTGCAGGAGAAGGAAAACATACACTGATCATATATAATGCAATTTTTGTCTTCTTTTTATTCATACATTATTTTTTAACTGTTTTATTGAATTATATTTCTCAGCAGCCAACAGACAGTCATTGCCTCGTAATATACAACCGACTTTTTCAAAGATATTACATCTGTACATATTTTGATTCCTTTTTCGGGAAATTAAAGGCCGGCGAACTTCAAAATATTCTTATGCTGAAAAATTCTAGGCAGTAACATTCTGTTCGGGCGACTGCTTGGAAGGAAGCAATGTCGGTAGATTGCTAGTAATTCCCTAGGCAGGGCCCAAAGGATCAGAGGAGTCTGGACGGTATGCTCTCTTTATTGCCTTGGTAGCACTC…
RPS24B	S_Bayanus	1.20243	0.0458476	AAAGATAGAAGAAAAAGAAAACAACCAGTTATATATGATACAGTATAGGTTTCTCCTTATTTATACATTATTATAACTATCTAACAAATTATGAACATTATGCCCTTTGTGTTTAGCTTAGCCTAATAAAACATATATCATGGGATCGGATGCCTTGCCTTATTGACATTTTGATTAATTTATTTTCAGAGACCGCTACATCTGTACATATTTTAAATCCTCTTTTGAAAAACTACAAAGTTGGAATCTTGAAACATTTTTGATTGAAAAATCCGGAGCGGAAGAAATCCTCACCGGCAGCCCTCCCCCCGGAAGGAAACGGCACCGAGGGGGGCTTGGTAGTTCTCTAGGCAGAGGACCAGTTATCCTAGGCGGATCTGGTCACCAGACCACCCCACC…	AAAGATAGAAGAAAAAGAAAACAACCAGTTATATATGATACAGTATAGGTTTCTCCTTATTTATACATTATTATAACTATCTAACAAATTATGAACATTATGCCCTTTGTGTTTAGCTTAGCCTAATAAAACATATATCATGGGATCGGATGCCTTGCCTTATTGACATTTTGATTAATTTATTTTCAGAGACCGCTACATCTGTACATATTTTAAATCCTCTTTTGAAAAACTACAAAGTTGGAATCTTGAAACATTTTTGATTGAAAAATCCGGAGCGGAAGAAATCCTCACCGGCAGCCCTCCCCCCGGAAGGAAACGGCACCGAGGGGGGCTTGGTAGTTCTCTAGGCAGAGGACCAGTTATCCTAGGCGGATCTGGTCACCAGACCACCCCACC…
RPS25	S_Kluyveri	0.64139	0.0124365	TTCATTATATAAGCTAGATTGGCTCATTCAGTATGGTTTATTTATTTATTTATTGATGCCCTGACATTCCTAGCGCTGCTATCTATATTCCAGGCAACACACGTATATTCCCGTAACTGTTTTCTTGAAAGAAAAAATGAAACCTAGCCGGGAAGTTGAATACTCGCCCAATTCGCTTGGAATACCTTGTATTACAGTTGATCCTAGTATATAGACATCAATTGGTTGTGTAACCACGCGCTGCGTTGGAAGGATAAGTCTGTGCACTTGATCTATCCTCTGTAATAATTGTGACGGTGAATATTATACACCCATACATGATAAAAACCCATGGATTTTTTGTATGAAAGTATAGCACCCATACACTAATTTTACTGAAATGTCTTTTTTTTCGCCTTT…	-
RPS25	K_Lactis	0.703077	0.00587118	TAGGACTTGTTGGTGTAAAACTTGCTAATCTATCAGATGAAACATCTGTTTTATAGCGCTCTTATTTTTAATGTTGTATTACGGGACTGTTTTGTTGGATCCAGACACCACGTTATATATCCGAAAGTTGAACTTTGTATATTTTCTCATGCGTTATTTCCTTCCTAAAGAGGAAATTATCTCCTTTCCAAAATGAGTCCATTTGTCGCAATCCTCGTTATCCTGCTTCACTTTCTCTGCTTCTCCGGTAGGAAGAGGAATACTTTGCGTCCTGGACAAACTCACTTCGGATTGAATATTCATTTTTTGATTTACATTGAATTGCAACTTAGAGATATTAACAAGTTGTTTAAAGTAGCACCTTGATTATTATAGGGTTATTTACTTTTGAGTTCATTC…	-
RPS25A	S_Paradoxus	1.4762	0.0279273	AGTAATTCACAAAACTGCTGGCTTTGTCAGACTTCTTGGTGAATTTAGGATGATAGCTGAATCAAAAGTTTCCTTTAGAAATGCCCGGCGGTAATGAATTATATTGAAATGGAAACCAATTATCGTCTATTGATTAGTACTTGCAATGTTAGTGAGAAGTGAGTGAATATTAAGATAATTGTTGGGATTTCATCATTTCATGAGATACCAAGACTAAACATTCTGAACATACTAGAAGTTCTTCTCAAGGAAAAAAAGAATGAAATCGAAACTAACCAATGCACCACTCGAAAAACCTTATAAAAATGATTGCACGAGCCAAATAGTTGCACATCTTCACTTCAACGTAATGAATAGAGTGTTGTACACTGGATGCAGTCCTAGTAGGCTTAGGGTTTA…	-
RPS25A	S_Bayanus	1.68537	0.034524	AATAAAACTTAGCACTAGCTATCTAAACCTACTAAGCTATACCTCACACATTTTTTTCCTATGCCTGAAACTGACTTTTGAGCCGGTACCATTTACATTATTTATGGACAGGACATGTAAGCTCCTCATGCAGAGAAAGCGTTTCACAAATACAAACACCCTTCCGCCAGGCTATTTGACTCTCAAAAATACTCTTGAATCATCAGTACACAAATACCAATGTTACGACGTTTTTAGTGCTTCTATATTAAATAGTTTACGGTACAGTGTATATCGTTTTGGGGGGATCTTCACTCCATGCTAAAGGCGAGGAGGCATAGTAAGATTTTGTTCTTAAAGTACTGAAGGATGAGAAGGCAACAATATATTTGCCTTTCTCGCTAACATTGACCCACCTAC…	-
RPS25B	S_Paradoxus	0.861389	0.0124052	AATATCAACATTCTTGATTACCTGATATTGAAAGGCAGCCAAGATATTAGATTATGCTCACTATTGGATTTCATTCCAATTACGTTTCTGAGGCGGGCATAAACTAGACCTTCTCGACAAGATTTCCCCCTGAAGGGACAACATTTTACAATCACGGGCAACTGCTACGTGAAAATGGGTATGAACACGTAATTAATTACGTAAGAACCCAACTGGTATTGATGCAGTTTTATCACCTTCTGAATTCCGGAGAAATTAATTCCTCCTTCCCTTTGCCTCCGTGCCTCCCGAAAAAATTAAACTGAATCCTTGCACCTCAAAAATATTTTGCAGAGCTTTTTTTTCGGCTCCTTGTCCTGGTGCCGTTAATAATGTACGCCAGAAGTTTCACAGATGTGC…	-
RPS25B	S_Mikatae	0.972469	0.0216867	GGATCAATAGACAGGGCTAACAATTGGATTTCATTCTTTACCGTGTTGCCAATATGGCATGAAGTCGGTTTTCCCAGTAAAGTTTTCTCTTGAGGTACTATCTTGCAAGAAACAACTACTGATGAATGGTCGACAATTGCTACACAAAGAGTACTTCTTTGATATACCAAAAAAAGTACTCCTTCACATAGGACAAAATTGATATAGAGGCATTCTGGTTCATAAGGGTTAATTGGCCTCCCAGCTTTTGATGGTATTTATTCCTTCTGTGATTTTGCCTCCGTGCCTCACTGGATTAAAATATTAATCCTTACACCTCTAGTATTAAACTTTTTCCAGCTGCATGTCCGGGTGCTTGTCGGATGCACAGAAAATATCAGCGGCGTGTTCATGACAGTC…	-
RPS25B	S_Bayanus	0.95999	0.0129986	AGGCAAGAAAGCTAACTCGCTGTAGCTAGTCATAATTTGGTTCGTGATACGGACTTTGTGATTACCTCCGCTTAATCATGGGGTTCTTTCTCAAAAGAACAGCCGTCAACAAACCACACTCAATCGCTATATGAACATCATTCCTGAGTTGAGACCATACCCAACCGGTTTGTACAAGTCTGACAGACATTGGTACAACAATGTTACTGGAACATAGAATTAATATTGTTTGGCTTTCAGGTAAAGTATTCCTACATTGTCTTTACACCCGTGCCTCATCAAACAAAATATTCCATCCTTGCACCCCTTAGTGTGCCTATAAGCACTTATATCGTCGATTCATCATCTTGGTTTGGCTCGCGAAAACGCAGAAAGGTCCCAAAGGAGTGGATGGAAATC…	-
RPS26	S_Kluyveri	1.01903	0.0245663	TAGAGTATTATCCCCGATTGTGAAACATTCACTTTAAAAGTCCCTGCGGAGGCCTTTCGGCTCGGGTCGGAGTTCCATTTTACGGCACGTGACACTTAAATCTCGGAAGCCTCCCCTCTCCCCTCCCCTCGTATCATCACGTAAAGCCGGTAATAGACTATCGCATGACTGTTTTAAACCCATACACGTACAATTTTTGTTTTACGTTTGACACCCATACTTTTATTTTTACGAGGGCTGGAATCACGTGAACGAAACGAGCTGATCGCTTGCGAAATGTCACCTCTTTTCATAGTATCCAACCTATCGTATTCTCCTTTCGTACGGAATCGCGTCTCTCGCAGCGATCTCTGTGTGTGCTTTCCACCAGCCTCTCGGTACACACCACCCCAGTTCAGC…	-
RPS26	K_Lactis	0.433558	0.0113214	GGAAATTCCAAATTTACCAATTTATCTAGGGAATACTCCGCTCCTGTCTGGGAATGGCCCCTTCTAGAGACATACATGCCTGTGTAGGAAGAAGGGGTAGGCTCCATCTCTGCCTGCCAATTGGAACCGCACGGGAAGCTAGTCCCAATCCATTGGTGTAGGTCCTACCATACCTCCGCCCAATTCCTCACTCTTCGCCTCAGCTCTCCCTCAACCCTCTGCCGTAAGCCACTGGTCCTTGCCAAATGGTATCGTTTGCACTTCCTTCGCCGTAGCGTCTAGGGTTAGCCCGTATTTTGTATGGTGAAATGCTCTTCCTAAATCACAGCTCTGGTATACTGAAAAATTTAAAGATAAGTTTTGTAATATATTAGAGAACTGTTTATTAGAGAGAGAGAC…	-
RPS27	S_Kluyveri	1.25394	0.0249514	GGCATTGTCCTTAGCAAGATGGCCCTGCGTCACGTTGCGCATGATACATAAGATAAAGATACAAGCAAAAAAGAAGGAAGAATAGTGAAAAAAAAGTGACTAATTAGTATGATCACCTGTAAATAGGTTTATAGATAGATTGTTTTTTTTAAAAAAAAAATTGATAGACGGGATTTAGCCGATTACTTTTGATCTCATATCACATCTTCCGATTCTGTGGACAGTTTTTATTCTGCTTGTTTCTGTTTTTCTTTTTTGGACCGAATCTCGTCGTTGTAAGCGATGCCCAAACGTCAGTTTTTTATGATGCGACTATTTTTCATGATTCACCCATACATATGATGTTTTGTAAATTTTTTTGTGTTTTTTGTAGACCCATGCACTTTGTGTACTAGCTAC…	-
RPS27	K_Lactis	1.58335	0.0269376	ATAATAAAACAGATGGAAACCTTCATCATTTTAGCATCATTACGACCAAAGACCCCTGTTTTCAATGACCTGTTTTTAGATAGAGAGATAGATCCGTAGATAGAATTATAATAGACACATACAATAGCACTTTTGAGCTTTAGCCATGGAATCGAATATGTGAAATGAGATGAGATGGACTTATGACAACGGACTGTCATCTCGTGACATCCGCACATCCTGTCTTTATTCACATCCTTCTCAGCACCCGTACATTATGAAATTTAACAAAAATTGTCATTTCTGCATTTGGAAAATCGTTTTGTTTGCTACCCGGATATTCATCGGTACACCACATACATAACTCCAGATTGTCAAAATGATCTCCACAGAAACACTCGCACAGCTTGCGATAACTTC…	-
RPS27	Y_Lipolytica	0.0676933	0.00404623	GTAGCTACCAAGAGAGGCAGTTATGGACACAGATTCAAGCAGCCTAGCCGTCCACTTCACGAGCTGTCCAAAACTGAGTTCCACTCACACACATGAACCAGGCATGGCCGCTCGTGATTGTCGTAAAAAGTGCACAGACAAGGTTGGGGGGAGGGGGGGGGCGCGGATGTGATTAGATGGGGCGTGTGAAGTGAACTGGTTTTCTTGTGGGAGACGATCGGAGGTTATTGGAGGATATGGGCGGCTGTAGAAGGGGGTTACGTACATATCTTTAGGTTGCTCCGCATTAATTTCATTTCCTCGATCTACGAATACGGCCGATCACGACTGTAGAACTTGTCACCACTATGTACATACGATTGATGGTTAGTAGCATATACACAGCCAACGGGCATCAGG…	-
RPS27	S_Pombe	0.0165096	0.00727964	ACATGAGGCTATTCATATACTGAATCAAAACCGATTTGTGTGAAATATCATTTTGTGATGCTTTTGGCATTATAAAATATTTTGAATTTGTAAGGTTGAGCATTGTAAGTAGCTATTGAATTTGTAAACAGTTGCAATTTGAGCATGTAAAAAAAGCGTAACTTGGTATGAAAGCAGTGTATTTATTTTCATATGATTGTGGATTGCGAATTGTTATTCGCATAATTAATTTGTAGCTGATTGTGCGTGTGATTACTGGTAATTAAAGTGTTTTCTGGCTGAAATGTTTATTTGGGCGGTGCTGAAGCACCAAGAATATAAAGAGGGGAGTAAAGCATAGAATTGTTGCACAAGCCTGAAATGCTAAAAAAAACTAAATTAATATAAAATGTGTCAAAT…	-
RPS27_v2ha	D_Hansenii	0.184082	0.00920983	TTTGTCAACCATATTCTTCCCCCATCTCCTATTTTTGTTTGTTGAAATGCTATATCGCTTTCTAAAATTTTTATACAACCCAAGTTATAATTCAATTTCAATAATGTCTTTGGTATCTTCTCTCCAATTATCTTGCCCTATCTTATGGTCCTGGTGAAATCGATGAACATTAATATTCTACCACGACATAAGATTCAGGTATCCCTTTGTTACATAGACTTCAGAATTTTATATCGCATATAGTTTGTTTTATATACCTACTTCCTTGCAAAAAAAGGCGGTATCTATAGTTTAAGAAATTGTTACAGAAGATCGATATATCATTGAATTGATGTTGCTGGATGTCCGGCTGCTGCTCCTACTGTTGCTGTTTTCGCTGCTCCTGCTTCGACCTTGAGT…	-
RPS27A	S_Cerevisiae	1.15532	0.019857	CAGAGACCGTGATGTCGTCAACAAGTATTTGAAGGAAAATGGTTACTATTAAGAAAAAATCTCTTTTCTAGCCATTTTGCCTTTTTATATAGTCAAGTATCTATATGTGACAAATACTTCTTCTAAGCTTGGCCTTCTGATAGGCTTAGCTTGCAGTGGTTGCAAACATACATAAATCAACAAAAAAGTACGGCTTAAAATTTTGGTATTCATTTATTTCAACCCGTGCACACTGGAAATAAATCTGTACATAACAGCATATTTTGTTTTTGAAAAAATTTCTGTGTTCCTCCGATGTGGGAAGAATTTTAGGATCGGCTAAATTTCGTAAAGTATCAGTAACTTGGTATCTCTGTATAAGCGGAGTCTAATTTCGATAACAAGCAACTTCATCGTAAC…	CAGAGACCGTGATGTCGTCAACAAGTATTTGAAGGAAAATGGTTACTATTAAGAAAAAATCTCTTTTCTAGCCATTTTGCCTTTTTATATAGTCAAGTATCTATATGTGACAAATACTTCTTCTAAGCTTGGCCTTCTGATAGGCTTAGCTTGCAGTGGTTGCAAACATACATAAATCAACAAAAAAGTACGGCTTAAAATTTTGGTATTCATTTATTTCAACCCGTGCACACTGGAAATAAATCTGTACATAACAGCATATTTTGTTTTTGAAAAAATTTCTGTGTTCCTCCGATGTGGGAAGAATTTTAGGATCGGCTAAATTTCGTAAAGTATCAGTAACTTGGTATCTCTGTATAAGCGGAGTCTAATTTCGATAACAAGCAACTTCATCGTAAC…
RPS27A	S_Paradoxus	1.05315	0.013003	CAGAGACCGTGACGTGGTAAGCAAGTACTTGAAGGAAAATGGTTACTTTTAATTAAAAACCGATTTTTTTAACCATTTTATCTTTTAGTATAGTAAAGTATCTACAAATGATAAATACTTCTTTTAAGGTTGGTCTTGGAATGAATGAGCTTAGCTTGCAAAGACCGCGAACATAAAAAAATCAACGAAATATACGGCTTTCGGATTTTGGTGTTCATCCATTTCAACCCATCCACTCCTTAAATAAATCTGTACATAACATCAAATGTTGTTTTTGAAAAAATTTCAGTAGTTTTTTCCCCGAGGTGGGAAGAATTTTAGGACCAGTTCTTTTAAATATGAAAAGTATCACTAACTTGCTATCTGTACAAGCGGAATAGAATTTCGATAACAAATCAC…	-
RPS27A	S_Mikatae	0.843193	0.00424552	AGATCGTGATGTAATCAACAAGTACCTAAAAGATAACGGGTACTTCTAGAAAAACTGAACCTTTTCGAAATATTTTTTATCTTTTATAATAGATAAGTATATATCATTGAATAAATACTTATTTAAGCTTATTCTTTATCTTAATATGCTTGCAAAGGTTACTACTACAAATGAATGAAAAGTATGGCCTCAGGATTAATTCATTATTCGTTTAAACCCATGAACCCGGAATAAATCTGTACATAACACCAAACATTTATTCCCAAAGATATTGTGTTGTTTTTCATCGAAGCGGGTGAGGAATTCTTAGGGCCCGGTTCTTCAAATTTTGAAAAGTAACAATAATATGCTATCTATGTATAAACTCAATAGAGTCTTGATAACAATAAAACTTTCACA…	-
RPS27A	S_Bayanus	1.3564	0.0473546	AGCAGCTGTTGTTTTTTTACTTGTTTATCTATATAAGTAGTTTATTTCTTCAATGAAAGTTGCTTCCTTTAACCTCAGTTATTAATAAAAGTCCTGAAGAAAGTGCTGTAGCTTTCTAAAGCCCAGTACTATAAGCGAATGCTAAAATGTAGAACCTTTTCAAATTTTGTTGCTAATTCATTTCCACCCATGCCTCTGATAAATAAATCTGTACATACCACCAAAATGATTCTGAAAACTCTCCGGAATTTTCGATGAGGCGGACAGGGGTTTTTCAAAACCGGTTCTTTGGAAATTGAAAAGAATCAGTATGTGGTAACTATGTATAAACTGAATAGAATTTTAGTAATAGTACAACCCTTCATACTTCAATAACAAAAAAAACAAACAGAAACATCC…	-
RPS27B	S_Cerevisiae	1.50038	0.016216	TGTGACAGCTATCTACTTATTATCTATTTTATAAATCCCATAAATTCTTTCCATATTACTTACGTCTATTATAACCTTCCGCGTAAAAAAGAAATATTGACATCCTTTCTTGTATTTAGCCCATACATTTTCACCCATGCACCATTGGATTATAAAGAAAAAAATTTAATAAAAATCTGCCGGGGAAATTTCAGAAGAAAAAAGGAAGGTGTGTTCGCATTTAACACGGGCCACCATAAACTTTTGTTTGCCACCCATCTAGACGGGATCCGCCCCGCCCAAGGCTCTCTTCCTCTAGCTAGGCAATGTGGCTCTCGGAAAGGAAACTCCCACCAGGACGTGGTGGGAAATGCAGCAATTCCCCTCTGCTTCCCGCTGACCTTTCTTGGGCCCAGTTTA…	TGTGACAGCTATCTACTTATTATCTATTTTATAAATCCCATAAATTCTTTCCATATTACTTACGTCTATTATAACCTTCCGCGTAAAAAAGAAATATTGACATCCTTTCTTGTATTTAGCCCATACATTTTCACCCATGCACCATTGGATTATAAAGAAAAAAATTTAATAAAAATCTGCCGGGGAAATTTCAGAAGAAAAAAGGAAGGTGTGTTCGCATTTAACACGGGCCACCATAAACTTTTGTTTGCCACCCATCTAGACGGGATCCGCCCCGCCCAAGGCTCTCTTCCTCTAGCTAGGCAATGTGGCTCTCGGAAAGGAAACTCCCACCAGGACGTGGTGGGAAATGCAGCAATTCCCCTCTGCTTCCCGCTGACCTTTCTTGGGCCCAGTTTA…
RPS27B	S_Paradoxus	1.55125	0.0138495	GACAATTGCTGGCTAATTATTATCTTTTTTGATTACCAAAACTCTTTACGTATGACTTAAAGTATATTTTAACCACCCATGGGAGAAAAAAAAAATTGGCTATTTTTTCTTGTATTTAGCCCATACATTTTCACCCATGCACCAATAAATTATAAAAAAAGATCAAGCAAAAATAGTGTTAGTGAAATTTCTGGAGAAAAAAAGGAAAGTGATGGCATTTAGCACGGACGGCCATAAACTTCGTTTGCCACCCATTCAGAGAGGATTCGCCCAGCCCACGTCTCTCTTTCTCCAGGTAGATATTGTGGTTTACGGGGAGGAAATTCTCACCAGGACGTGGTGGGAAATGGTGCGATCCCTCCCTCTGGCTCCCGCTGACATTTCTTGGGCCCAGTTTAG…	-
RPS27B	S_Mikatae	1.70348	0.0354443	TGTCGATTCCTATTTACTTTTTATGTATGTGTCATATAAGGAATGATATCTTTATTCTCCCAATACAGGAAAATTTAAAAGTGGACGGTATTATACATATGAACCCATACACATATGAACCCCGTACATCTTTTGTCTTAGAAAAAAAGAACGGAAAAATTATCAGTAGTGAAATTTTCCTAAAGAAAAATGAAAAGCGCAGTGACATTCAACCCAGACCACTGTAGGTTTTGTTTGCCTCCCATTTCGAGGGAGTCTGCCTAACTAATGCCCCCCATTCTCCAGGTAGGTTGTGTCGCTTCTGGGAGGAAACTCTCTCTAGGCGCGGTGGATAGTAGGAAACAGTGCGATCCTCTCCTTGGATCCGCTCACCTTTCTCGGCCCTTGCTTTAGTAGGTT…	-
RPS27B	S_Bayanus	1.54415	0.0550866	GCAACAATCTCTATATAAAGGTGAGACAACAATGTAGAATATTATATATGCGCAATATATGGAGGGAAAGGGAAACCTGATATAATTTCCTTTCCCATTTTAGACCCATACATTACTTCAATCATCATTTTACGCCCATACATATGCACCTGTTAAAAAAACCGAGTAAGTAAGCGGGCACTGAAATATCTCAAAAAAGTGAAAGGCGCGATCGCATCCAGTACAGGTTGCCGTTGTAACTTTCAATTGCCACCAGCTTGCAAGGAATCTGCTAGGCTCATGTCTCCCCTCCCGAGGTGGTTTGGATTTTCTCTGGAAAGAGCACTCTTTCCAGAGCGTAGTGGGAAGCAGCACTTCCCTTCAGACCCCTCTGAGCTCCCGCCGACCTTTCTCTGGTGT…	-
RPS28	S_Kluyveri	1.21823	0.0174053	TTTACCGTATATAAATGTTTTTATGGCTGCGAAATAGTGCTTAGAAATAAAGAAACCAGACCCTTTTGAAATTTGCAGTAAATAAGAACCATAGGCTCTGAAAACGTCTGTTTCATGCTTTTGCACTTACCCAATTACACGCATTCACACAGAAACAGGGCCAAGATTAACAGCTTAAAGCCATGCGTAAAGTCCTCAGTGCCATTTGCTGGACATTTCTCAAGTAGCTAGCCACATTTATGAACCACGGCGTCCATTGAAGCAGTGATCCAGCAAAGTCACAACACAAATGTACACATGTATATCGTGAAATCTGTATCAGGAACCATTGTATGTAGGGTATGAGGAATGAAGTATTTAGTCTTGACAAACCTAGAGCCTCTGGCTAAAAAACGTCTA…	-
RPS28	K_Lactis	0.48886	0.0326587	TCTCCTTGCAGAATGGCCTTAAATATATTTCACATGTGTCTCTCCTCACTTTCAACATTCACCTAAATAGCTAATAAATATAGTTCAGACCATGAATAAGTCTTTACATGTATATAAACTCTCACCTAGCTTTGTCCTTCATAGTGTCAGACTGGAGCGACGGTGGCTTTAGGAATTCCGTATAATATGACCTTGTCCAAACCTACCCAAGCGACATTTCCATTTTTTCAGTTTTTTTTTCATTTTTTGTATGTGTCTCATCGAAAACTTTTCAATGAAGAAAAAAAAGCTTCCAATGAAATATTTAGCACATTCAACATCACTTCTGTACAATTGAATAGTATATTTATTGTTTTAGTTAGTGTTAGTATTGTTACCGGAAGAACCATCAAGCAACA	-
RPS28A	S_Cerevisiae	1.34151	0.0332454	TGACGTTATTATACTCCTGATATTTTTTTCTCATTAAAACAAGCATCAAATCCCTTTTAAGCATATCAATCCCAATCTTTATACCCTGCGATGTCAAATTTTTCATTTGTACAGACGCGGCCGTCTAGAGTGACCACGCACTTTTTTGATAAATTTTTTTTTTCTTGGTCGTTGAACTACTTGGAATAAAGAAAATGAAATTTCAGTCTAATAGATGATTTATTGTAAATTACAGTTGTGTTCGTTTTCGATTCTTCTCAAAAGCAGAAAACCAAGCTAGCAATC	TGACGTTATTATACTCCTGATATTTTTTTCTCATTAAAACAAGCATCAAATCCCTTTTAAGCATATCAATCCCAATCTTTATACCCTGCGATGTCAAATTTTTCATTTGTACAGACGCGGCCGTCTAGAGTGACCACGCACTTTTTTGATAAATTTTTTTTTTCTTGGTCGTTGAACTACTTGGAATAAAGAAAATGAAATTTCAGTCTAATAGATGATTTATTGTAAATTACAGTTGTGTTCGTTTTCGATTCTTCTCAAAAGCAGAAAACCAAGCTAGCAATC
RPS28A	S_Paradoxus	1.2694	0.012441	TGACGTTGCTATACTCCTGGTACTCTCCTATCAGAACAATAACCAAATCCCTTTTAAGCATATCAATCCCAATCTTTATACCCAGCGATGACAAATTTTTCATTTGCACAGACGCTGCCGTGTAGAGTGACCACGCACTTTTTTTGATAAATTTTTTTTCTTGGTCGTTGAACTATTTGGAATGAAAAATGAAATTTTAGTCTAATTGATGATTTATTATCAGTTACAGGTGCGTTCGATTTCACTTTGCTTCAAACCTAGAAACCAAGCTAGCAATC	TGACGTTGCTATACTCCTGGTACTCTCCTATCAGAACAATAACCAAATCCCTTTTAAGCATATCAATCCCAATCTTTATACCCAGCGATGACAAATTTTTCATTTGCACAGACGCTGCCGTGTAGAGTGACCACGCACTTTTTTTGATAAATTTTTTTTCTTGGTCGTTGAACTATTTGGAATGAAAAATGAAATTTTAGTCTAATTGATGATTTATTATCAGTTACAGTTGCGTTCGATTTCACTTTGCTTCAAACCTAGAAACCAAGCTAGCAATC
RPS28A	S_Mikatae	1.30844	0.0272712	CGGTGTTGCTCTACTTCTGTAATTCTCCTAGTAGATCACTAATCTTATCCCCTTTTAAACTGCCAATCTCAATCTTTTTATCTCAGCGATGACAAATTTTTCATTTACACAGACGCAGCCGTGTATAATGACCACGCACTTTTTTTTTGACAAAATTTTTTTCTGGTCGTTGAACTATTTGTATTAAAAAATGAAATTTCAATCTAATTATTGACTTATTGCCAGTTGTGACTACTATCTATTTTATTTTGTTTCAAAGCCAGGAAACCAAGCCAGCAATC	CGGTGTTGCTCTACTTCTGTAATTCTCCTAGTAGATCACTAATCTTATCCCCTTTTAAACTGCCAATCTCAATCTTTTTATCTCAGCGATGACAAATTTTTCATTTACACAGACGCAGCCGTGTATAATGACCACGCACTTTTTTTTTGACAAAATTTTTTTCTGGTCGTTGAACTATTTGTATTAAAAAATGAAATTTCAATCTAATTATTGACTTATTGCCAGTTGTGACTACTATCTATTTTATTTTGTTTCAAAGCCAGGAAACCAAGCCAGCAATC
RPS28A	S_Bayanus	1.34015	0.0129291	TAACGTTATGAACACCTGGTATGCTTTTGTTGCACTCAAAACATGTCCCCCTTCCACCACATCGATATTAGCCTGTTTATCTTTAACGATGACAAATTTTTCATTCTCGCAGACGCAGCCGTGCCGAGTGACCGACGCACTTTTTGTTATTTTTTTTTTGTCGTTGAACTATTTGCAAAAAAATGAAATTTCAGTCTGATTGATGATTTATTATCTCCAGTTACAATTCTTTTTACTTCAATTCAAAACCAGGAAACCAAGCTAGCAAAC	TAACGTTATGAACACCTGGTATGCTTTTGTTGCACTCAAAACATGTCCCCCTTCCACCACATCGATATTAGCCTGTTTATCTTTAACGATGACAAATTTTTCATTCTCGCAGACGCAGCCGTGCCGAGTGACCGACGCACTTTTTGTTATTTTTTTTTTGTCGTTGAACTATTTGCAAAAAAATGAAATTTCAGTCTGATTGATGATTTATTATCTCCAGTTACAATTCTTTTTACTTCAATTCAAAACCAGGAAACCAAGCTAGCAAAC
RPS28B	S_Cerevisiae	1.45163	0.018394	ACGCAATTCTTTTTAGATTTAAGATGGCTAATAAAAGTAATATAGGCAAGCTTATTCATGTTCGAATCTTTTTTTTCTCGCAGAGCTAGTACTCTGGCAATCGACACTTATTTCGTACAAAATGATCACGCAACTTTTGACAATTTTTTTTTTTTCATCTGTTTTCCAGGAAACTTGGATCTTTTTTGCTCCATAGCACTTTTGGTCTTCCTCAATTAAATATTTCTAGATCCCGGTAGTTCTTCTTCTTTGATCATTAATAAAAAATAAGCAAAGCATAAAAGAGCAGCAAAA	ACGCAATTCTTTTTAGATTTAAGATGGCTAATAAAAGTAATATAGGCAAGCTTATTCATGTTCGAATCTTTTTTTTCTCGCAGAGCTAGTACTCTGGCAATCGACACTTATTTCGTACAAAATGATCACGCAACTTTTGACAATTTTTTTTTTTTCATCTGTTTTCCAGGAAACTTGGATCTTTTTTGCTCCATAGCACTTTTGGTCTTCCTCAATTAAATATTTCTAGATCCCGGTAGTTCTTCTTCTTTGATCATTAATAAAAAATAAGCAAAGCATAAAAGAGCAGCAAAA
RPS28B	S_Paradoxus	1.23909	0.014716	CCACAATTATTTTTAGATTTAAGTTGGCTAACAAAAGCAATATACAAAAGCTTATACGTGTTTGATTTTTTTCCCTCATCGCTTGCACTCTGTCAATCAGAGCGCCAATACGTATAAAATGATCACGCAACTTTTTTTGACAATTTTTTTTTCATTTGTTTCGAAGAAACTAAGATCTTTTCTGCTTCATTAGCATTTTTGGTCTTCCTCCATTTGACATTTTTCAGATCCCGGTATTTCTTCTTTTCTCTTAATGAATAGAAATAATAAACAAGGCAAAAAAGAGCAGCAAAA	-
RPS28B	S_Mikatae	1.26754	0.031622	TCTACAAATTTTTTAGTTCAAAGTTAGCTACGAAACTACACACGCATTTAAATGTACTCAATTATTTTTCCTTAATGGCAGTCGTTTTCTGCCCATCATTACTTATATTCGTAAAACATGATCACGCAACTTTTTTTGTCAATTTTTTTTTCATCCGTTTTTCGAAGATACTTAGACCATTTCTGCCTCCATTAACATTTATTGGTAACTCTCGATCGACTTTTTTTTAGATCCCAGTAGTTGTTTTCCTGTTCTTTATTAAAAAAACAAAGCAACCAAGAGCAGCAGAA	-
RPS29	S_Kluyveri	1.48834	0.0223651	GCTGCTGGTTTACTTTTGGACACACTTTATTATTGGCTAATGAGATGAGATGACCTTGATATTCCGGAAAAATTTTCAGATGTTGGCGAAAAAGAAATTAGAACCATGTTTTTAGGGTTTCTGAATATACATCCTATATTATGACTTTTTACTCTATTACATCCGTACATTTGTTTTTTCTTTGACACCCATTCACCACTGTCAACTTTGTGTATTTGTTATTTAAAGGTTGTTCAGAAAAAAGTGCACAATCCAGCAATCCAGCGACGCGCACCATTCGTCGCACCTGCACAGGCTCCAGGATTCTCACCAACTTCCATCATCAAGGTATTAATCAACGGATTGAACAATATTGAAGACATTTGAAGATAAATTACCAAGATACTATAGATTAATGTA…	-
RPS29	K_Lactis	0.993237	0.0142839	TTAACCTGTTCAGCATTTTGTGATGAGCTTAGATGAGATGAGCTTCACTATTAAAATTTTCAATGTACAACTTGTTACGAAGAAAATCGTCAACAAAGAAGACAGACAACAAAAAAAAAAGAAATGTGAAGCCTGTGACTGTTTTGGAGGCAATACATCCGTGCATCTTTTTTATTCTTTTCTGTTTCTTTTCTGTTGAAGATAGATTTTCATTCGTGGTAAGAAAATTCCTTATATGGTAAAACATTTTTGTTACTATCCGTCTTGGTGATGGAATTTGCCAGGTTAGAGCAAGTTTCACCAAACTCAGGTTCTTCAATATTAACAAACTTAAGATTGATTAACTGTACCAAATGATATAGGCAATTAATACTCATTTAAGAGCTAAAGAAAGCATAC…	-
RPS3	S_Cerevisiae	2.27621	0.030449	TCTGCTACTTTCCATTATCTGGTCATCACTTACCGATGTGGAGAGCCTTGCCCTTGAAAAATAAGATAAGACCTCCGATTAGGGTATTTGAAATTAACCGCTGTAGAATGAAATAAGGACGCTTGTTTGACATTTTTTAGTTGCTTTCTCTATCTACCACCATTTGCATCTTGATTTATGTCTTGTTTGAGGAGATTTCGGATAAATATTCTTCGAGGGGAAAATGTCGTAAAAATAAAAACAATAAAGAAACAAAACGATTAAAAGAAAAACTCAACCATCCTCAAAAGTCCTCCTCTTTTTTTTCACGTGCTGCGCTGATGTAAGCAGCAGGACATGGCAGGAAGAAAATCGGAGAATTGTGGCCGCGACACCTGACAAACAATCCTCAGGCAAATG…	TCTGCTACTTTCCATTATCTGGTCATCACTTACCGATGTGGAGAGCCTTGCCCTTGAAAAATAAGATAAGACCTCCGATTAGGGTATTTGAAATTAACCGCTGTAGAATGAAATAAGGACGCTTGTTTGACATTTTTTAGTTGCTTTCTCTATCTACCACCATTTGCATCTTGATTTATGTCTTGTTTGAGGAGATTTCGGATAAATATTCTTCGAGGGGAAAATGTCGTAAAAATAAAAACAATAAAGAAACAAAACGATTAAAAGAAAAACTCAACCATCCTCAAAAGTCCTCCTCTTTTTTTTCACGTGCTGCGCTGATGTAAGCAGCAGGACATGGCAGGAAGAAAATCGGAGAATTGTGGCCGCGACACCTGACAAACAATCCTCAGGCAAATG…
RPS3	S_Paradoxus	2.19803	0.0195773	CTGCTGTTTTCCATTATCTGGTCATCATTCACCAATGTAGAGAGCCTAGCCCTTGAGAAATAAGATAAGGCCTTTGGTTAGCGTATTCGAAATTGAGCGCTGTGAAATGAAAAGCGCTTGTTTGACATCTTTACGTTGCTGCCTATCTACTACCATTTGCATCTTGATCTATGTCTTGTTTAAGGAAACTTCGGATAATTATTCTTCAAGGAGCAGATGCTGGAAAAATGAAATCAAAGAAAAAATATAATGAAACTCAACCATCCTCGAAAGTCTTTCCTTCTTTTTTCACGTGCTGCGCTGAGGTAAGCAGCAGTACATGGCAGGAAGAAAATCGGAGAGTTGTGGCCGCGACATCTGACAAACAATCCTCAGGCAAATGTAGGACTGTACATGAAA…	-
RPS3	S_Mikatae	2.44947	0.0245707	TCTGCTGCCTTCCATTAACTAGTCGTTATTCACCGGCGCGGAGAGCCTAGCCCTTGCGGAAAGAGATAGGTCCTTCTATTAACGCAATTGAATTGAGAACTGCAAAAGAGAAAAAAGGATGCTTGTTCCACCTTTTTCGATTGCAGTTAACTTACTACTATTTGCGTCACCATCTATATCTTGTATAAGGAGACTTCGGATAATTCGTCCCAGAAGGTGTTGGAAAAAAAAAAGAAACAAAGAAGAAAAAGAAGTGCAAAAAGGAAAGCTCAACCATCCTCGAACATCTTTCCTTTTTTCTTCACGTGCTTTGCTGATGTAAGCAGCAGGACATGGCGGACAGAAATCGGAGAGATGTGACGGCGACTCCTGACAGACAACGTCAGGCAAATGTAAAAT…	-
RPS3	S_Bayanus	2.45578	0.0535214	GTAAGACAAGAATGAAGATAGTGTCTATATGAGGTTTTTTCCCTTCGATATATGCAATGCTATTTTGGTAGTTCATGTATATGCTTTACCCTGCATAGCTCAGAGAGCCTCTCTATACAATTTGAGGAGAAAATGTCGGCAAAATTGGAAAGATACAGAGAGCAAAAAATGGAAAAAAGGAAAAACTCAACGGTCCTCGAACGGCGGTCCTCCTTTTTTCACGTGTCGTGCTGATGTAAGCGGCAGAACAAAGAAGGAGGAAAAACTAGAGAAGTATTGCCGTTACTCCTGCGAAACAGCCCTCAGGCAAATGTAAAATAGTACATGGAAGGCTGCATAAAACAACCTCATCATAGGCCGGCCCACATAAAGACTCGGAGGGTTAAGCAAGCTGGAAGA…	-
RPS3	S_Kluyveri	0.618019	0.00599434	GTTTCAATGTTCTTCGTGTTTGCTCTTGCTAGACCTTGCTCTGCCATAAGATCCGATCTAGCGGAGGATGCCGTCATCAACGGTTTATATAGGAGGTTCCTACCTCGAAGTCAAATGGTTGCGTCACTGTGAGTGTTGCAGGGCTACACCCACAACTTTTGTTCAAAGACGGCCAGCAGACTAGGAAAAGATGTTATACGGCGTGGGCGAGCGAGGCGGACGATCTCGTGCACAAGATCCTAAGAGCATGAAGAGTCAGCGAATCTGTTTATAACAGGGCAGAAGAATGAGAAGAGTGAGCAAAGACATTCCCATCCACACAGCTCAGTATGTCCCGCTGATTCTTGTGGCTACAATACTATAGCAAAAACTATATATGTACATTCCCCTCGTAGCACA…	-
RPS3	D_Hansenii	0.150335	0.00442466	TTTGTGTATATTAAAATATTGATTCCATAGAAAATTGTTTAATTAAATACGTAGCATTTATGAAACTTCACATCATGTAGGCACTTCGTTCATTGGTAGAGAGTCATTAACCATAAGTATAGTACTACAACTGACTTGTGCAGCATTTACTGGTAAAAAATTATTACATAACACGAACAAGACGATTACATAAACAAGATTGATTCAGAATTTTGGGGTCGTGGATCGTACCGAACATTTTTTTTCAGTTCACCAGGACGAAAAATTTTTCACATATAGGTGAAAATTATAGTTAAACTTCTTCTTGTTATATACAACAAATCATAAATATACAAA	-
RPS3	Y_Lipolytica	0.0151012	0.00734234	ACTCAACAACATTCTGGGGTTAGATCTGTGTCTGGGGGTTGGGGGAGGTTAATTTTTTTGCTAACGGCGCTTGTGGGGCTATACTTGATTACGTAACCGAGTTTTGGGCTTACTTTTGCCATCATCCCGGGGCCGTCTTGATGCGAGTTGATGCGAGTTGTCGCGAGTTGTTCCTATCTTCGGAGAGTTGCACACGGCCTCAAGGGGAGTTGCAAACGGCGTCATGTGGGTGTCATGGTGATGGTGGACGATAAAGGCAATAGAATGGTTATATTGGTGATTTGTGTCTAATTTAATCATTTCTAGCGTCCTCTAGCGTCCTCTAGCGTCCTCCAGCGTCTTCCAGCGCCCTACAAAGTCCCCCTTTCTTCCTCATTTTCAACAAAACTCCCAACTAAT…	-
RPS3	S_Pombe	0.0106295	0.00483443	ATGCGCATTCTTGGATAAAGACATTATGCTCTTTCATCACAATTATTGCTAATGAAATTTTGGAATTGTTCGTTTCCGTTAACTTGCGAAAGTTTTCCTGTTAAGGGAGATTTTAACCTAATAATTAAGGTTATACGGTTGCTATATAATCATCAAACGTTGACAACAATACTACTGACAAAGGATAAATGCCAGTTGGATTGCTTCTGGAGCTCTCAAGGATTAATCGAAATAAGCTGTATGTTTTTTCTGATTTACTTGCCTCACAAAAGGTCGATCCTTTAATAATACACTTTATTTTCGATAACAGTCGAGAAGACACTTCTATATGAAGAAAAAACTATTATTCATTTTGCATGTCCCTGGTCGGACCTGTATTTGCATACAAATTTACTTCAC…	-
RPS30	S_Kluyveri	0.568631	0.0200431	TTTTCTTTATAATCTGAATTGGGCCAAGTAGATACTGATAGACAGGGAGAAAAAAAGGGTTGACAAAGGTGCCGTCAGTTTAATCAACCTGTGTTATTATATGCATATATATTTCCTTCGGGACAGATGACTCTACCTCGCATTTTTGTCACCACAAATTAAAACTTGGAATTAAATTGGAAAATTTTCGCGAATGCCACAGCTGAAAAGCATGACCATAGGGCTCTATCAACCATCCTTTAGGGTACTAGTTGATGGTGTGACTGCTTTGTAAACACCCGTACCTTTTTATCTGTTTATCTTTTGTGTACGGGTTTTAAACTTTTTTTTCGCTTTTTTTTTTTACTGTCTTATTATCATCGCCTCATTGGAATTAGTGATACCCGAATCTGAGAGACC…	-
RPS30	K_Lactis	1.53188	0.0238228	TGGTAATATAATGTGAGTTTCACGGACTGGCGGCCTTGTAATATACTGCTAAGGTCTTAAATCTGTTAAATTGCAGTCAACAAGACGGCAACTTGCTTGATCCATCGTTTAATCATTTCATTTAAATATTTAATATTCGTATTGACTAATTATTACTTGTAATACAAATGATGATCCCCAAGTCTAAGTCACGTGAAATGGCATGGATCATTCTTTTGGAACATACAGAGGACTGTCTTCGATCCCAACAAACATCCATACACCATTATAATTCTCTTCATGAAATACATCCAGACATCCAACGTCATATTACACAAAAATATCTGAAACACCCGAAATATCCCTAAACGGGAAATTATTGGCTGTATATTTTAGAAAAGTTTCAGCAGTTTGTGAGGA…	-
RPS30A	S_Cerevisiae	1.85965	0.043721	ACCCTACAGCGGTACATTTCTTTGCTACGTTGCTAAGGAAACTCTTTAAATCTGACATGGCTGAGAACTGCAGAGTTGCAGAGTTGCAGACTATCACATCCGTACATATGTATAAAAAAATCCGTGCTTTACATACTAACTGCTTTTCTTTTTTCCGTTCGAAAAAAAAAAATGTCGTGAGGTTGTCGGAAACCTCAGAAAAAATAGATAGAACAAAACAGCCTTACGAACGGTATGTTGCATTTTAAAGGCTACATGAACTGCACATTAAATTTGCCACTGTAATAATCTTCCATATCCCCATACAAAAACTACGCAAAT	ACCCTACAGCGGTACATTTCTTTGCTACGTTGCTAAGGAAACTCTTTAAATCTGACATGGCTGAGAACTGCAGAGTTGCAGAGTTGCAGACTATCACATCCGTACATATGTATAAAAAAATCCGTGCTTTACATACTAACTGCTTTTCTTTTTTCCGTTCGAAAAAAAAAAATGTCGTGAGGTTGTCGGAAACCTCAGAAAAAATAGATAGAACAAAACAGCCTTACGAACGGTATGTTGCATTTTAAAGGCTACATGAACTGCACATTAAATTTGCCACTGTAATAATCTTCCATATCCCCATACAAAAACTACGCAAAT
RPS31	S_Kluyveri	0.689727	0.0079402	CTGCTATAACTCGCTACATCCGTACATAAACGTGTATATTCTGAATATTTTCTCTTTCTCCTGAACATAGCTACGATAAAAGTGAGGTGGATGGGTTCTACAGTACGATTCGAAAATGCACACGCGCAGTCTTTCGGGTTAACTATGCAAGTCACATATTTTTAATCACTATAAACGAAAGACTACTTTCCTTCTCCGTGCGAAGCAAAGCTCGGAAAATTTTTTGCAGTAAGTTCAAAGTGGACTGGAGCATCTGACTACCTTTTCAATTTACTTTCTCCTTTACATTAATCAGTCAACCTACTTGGTAAGAAAGAAGCACATATTTGCCGACAAGCCAAG	-
RPS31	K_Lactis	0.40515	0.0205782	AACAACAGATAGCGAACGGTTTTTTATCGTCCCCTATGGGGACTTAGTTACAGACCAATCGAAATGCAAATCCAGCAGTCCCAATTACGTCAGGAACCACACGAACCACTAAAATTACGGGACTGCTATTATTACCAAAACCCTGACACGACAATAAACATCCTTACACCCACGTTAGAATAGAAAAGTTTCAGTATTTCCCAAAAAAGGAAACACGTACCTCATATGACACTTTCACCACTTCCAAATTGGGTAAGAATAATGGAACCAAACTACTATGGCTGCATTCATTGGGACTTGTTTCTGGTATTCCTAACAAGTCGGGCAGCCAAATGTAAGTCGTTTGAAACGACTTCGGACTGCTCCCAATTTTTCGTCATCTGAAAAATTTCAAGAAAT…	-
RPS4	S_Kluyveri	1.3081	0.0238676	TCCCTGTATGTTTTTGCTCTTCTATCCACAATGTTGGTATATTTCTGGTAATTTTTCGTTGGATTAGATGATCCACCGATATCAAAATCAAGACAAGAAAACAAAATACGCCAAGAAAATATATAAGGAGTTATACAGCGGAAAGAACAAATACAGTTCAAGACTCAATATTTGATCAAAAACTCCAAACCAAAAGAACCCTCGCCTCGTAGTGCAAGAGAGAATGAGTAGGAGGATGCAAGTCTTGCGATATTAGAGTCTAGTTGTTCAGTTCCTAGGGGATATTAAGGGGGGGGGGGAACATAAAAATAAAGTTGCAACTGAATGAAGTTGTATCAACCAGAATCCTTCTTTGTTTTGAGTATCGTGTTTCACCTAAAACTCATGATATTCGTAGAA…	-
RPS4	K_Lactis	1.7383	0.0609555	AACATGTATGCTCAAATTGTTACCAATTGGGCAATACAGTATTAGAATCTAAACAACTTGAAAACCTCGCTTGAAGGTATATATGGGTCCTTCGGCTCATAATCATCGACTGGAAACATTCAGAGATCTTCAAAAGGATGATATTTACATTTTCTAATCAATGCCAAATGCATACGCTAAGTACAATATAATGAACCCTGTTCGATTGTCATTTTGTAGTAATGTGGGACTGTTGTTCTACATCCTTACCCCTTGAAATGTGTCAAGAGTTTCAACACCCAGACATACATTCTATATTTTACAGAAATTTTAAACTTCCGAATATAGTGTTTATAGTCACGTTTTTTCCCTTCGCTGATATTCCGAAATGGAAAATAGACAGCTCAACACCGCCAGCCA…	-
RPS4A	S_Cerevisiae	1.74986	0.030083	ACACACTTGGCGACTGCCCTGACTGGCAATATATACAGTCCGCAAATGTCGCGGACTGATGCGTCCACTTACTCTTCCTATATACCACCTGGGTGAAGAGGAGAAGTGAGCCCGTTCTGGAGATATATGTCCAAATATTTGCAGATCCAGTTTTGTCATTATAATGAGATGCCTTTTGGGCGACAAAGTTCGGGTAAAAGAAGGACGGGTCCAGGAAGGCCGTGGCCACAGAACAATGCGCAGAGAAGATTTCCGGTTTCTTTTTGGCTTTTCCGACTTTCATCTTTTAGAACTAAAGATTTCCTGCATCGGTAAACCTTAGCAATGTTTCTCTAGAGGGTTTTTGCACACCAGACACGTCGCACGTGCTCTTGCAGAGACTGCTGCGCTTTCGTTTAC…	ACACACTTGGCGACTGCCCTGACTGGCAATATATACAGTCCGCAAATGTCGCGGACTGATGCGTCCACTTACTCTTCCTATATACCACCTGGGTGAAGAGGAGAAGTGAGCCCGTTCTGGAGATATATGTCCAAATATTTGCAGATCCAGTTTTGTCATTATAATGAGATGCCTTTTGGGCGACAAAGTTCGGGTAAAAGAAGGACGGGTCCAGGAAGGCCGTGGCCACAGAACAATGCGCAGAGAAGATTTCCGGTTTCTTTTTGGCTTTTCCGACTTTCATCTTTTAGAACTAAAGATTTCCTGCATCGGTAAACCTTAGCAATGTTTCTCTAGAGGGTTTTTGCACACCAGACACGTCGCACGTGCTCTTGCAGAGACTGCTGCGCTTTCGTTTAC…
RPS4A	S_Paradoxus	1.74249	0.0445265	ACACACTTGGGGACCGCCCTGAATGGTAATATATACAGTGTGTAAATATCACGCACTGATGCGTCCACTTACTCGTCCTATATATTCCATCTGGGTAAAGAGAAGAAGTGAGCCCGCTCTGGAGATATATGTCCAAATGTTTGTAGATCCAGTTTTGTCATTTTTGTCATTATAATGAGATGCCTTTTAGGCGACAAAGTTTGGGTAGAAGAGGACGGGTCCGGGAAGGCCGTAGCCATAGAAAATGCGCAGAGGCCATTTCCGGTTTCTTTTTGACTTTTGCAACTTTCATCTTTTAGAACTAAGATTTCCTGCATCGGTAAACCCAGGCAAGTTTTCTCTGGAGAGTTTTGCACGCCAACACCTTGCACGTGCTCTTAAACAAAGACTGCTGCGCTT…	-
RPS4A	S_Mikatae	1.73502	0.0376745	AAACTCTTGGTCACCGGATTGACTGGCAATATATACAGCCCGCGGCATCCGTGGAATTATGACGGCCACTTAGTCATCCTTTATACCACCTGGTCGAAGAGGAGAGGAGAACCCGTTCTGGAGATATATGTCCAAATATTTGCAGATCCAGTCTTGTCATTTTTATGATTATAAAGAGATGCCTTTTAAGCGACAAACCTCGGGTCCGAGCAGATGGGTCGGGGAAGGCCGTGGCCAAAGAAACACGCGCAGGCCTCGATTTCCGGTTTCTTTTTGACTTTTCAACTTTTATCTTCTGGAACTCTAGCTTTCCTGCATCGGCAAGCTTACTCTATGTTTCTTAAGAGGCTTTTCGCAGGCCTACGTGGCACGTGCTCTAGTAGAAACTGCTGCGCATTC…	-
RPS4A	S_Bayanus	2.12214	0.0249828	CTGCCAATATATACAAACCGCGCATGTTCGCGGACCGTCAGCGCTGACCTGCCTGTCCTATATACTTCCCACGCGAAGAGGAGAACAGAACCCGTTCTAGAGATATATGTCCCAAGATTTGCAGATCCAGCTTTGACATTGTGTTGTGTGACGCCTTTTTCAGCGACAAAGTTTGGGCTGGAGAAGTCGAACAAACACCAAAGCATGCGCGGCTCCGGACGGGCCGTAGCTTACAAATGCCTGCACCACCCGTTTTCCGGTTTTTTTTACGCTTTTTTCCCACCCTCTTCTCTGTTGCGAAGCTTTTTGGGCCACTGTTCTTCTGTTCTGCATCGGGCGACAGACAGGTCCCAATCCTCGAGCAAGAGACTCGCTGCAGGCCGCGTTCTGCACTTGTTG…	-
RPS4B	S_Cerevisiae	1.21778	0.0231556	TCCCTGAATGTAACCAATCCATGGAAATATGAAATTATCATGGTTACTCTTGACCCATTAATACATATTCAAAAACGCGTCCTTCTTTATTGCTTATTATTAATAGTCGCTGAAACACGCCAGAAATAAATCGTTACCCGTCGTTAAAGCACAACGGAAACCTATCAGTCTATACCAAATGTACTAATAGTGTAACCATGGTGAGATAGAGTCGCCAGTGAAACTAACATTGAGCAGTGCTTGCTTTTCAGCCTGTTTTATGGTTATTCTCTTTAAACAATTATTTTCGAGACAATTATGCATCCATACATTTCACCCAGACATTTTGTGTGCGCGTTATTGCGCTTTTTGCAGGGCGCATCTCCTTTTTTTCTATTTTTTCAGGCTAGTCAGTGTCAC…	TCCCTGAATGTAACCAATCCATGGAAATATGAAATTATCATGGTTACTCTTGACCCATTAATACATATTCAAAAACGCGTCCTTCTTTATTGCTTATTATTAATAGTCGCTGAAACACGCCAGAAATAAATCGTTACCCGTCGTTAAAGCACAACGGAAACCTATCAGTCTATACCAAATGTACTAATAGTGTAACCATGGTGAGATAGAGTCGCCAGTGAAACTAACATTGAGCAGTGCTTGCTTTTCAGCCTGTTTTATGGTTATTCTCTTTAAACAATTATTTTCGAGACAATTATGCATCCATACATTTCACCCAGACATTTTGTGTGCGCGTTATTGCGCTTTTTGCAGGGCGCATCTCCTTTTTTTCTATTTTTTCAGGCTAGTCAGTGTCAC…
RPS4B	S_Paradoxus	1.3217	0.0372648	TCCTCAAACGTTGAGCAATTCATGGAAATACGACCTTAACATGGTTACTCTTGATCCATTAACATACATCTCATCAAAAACGCGTCCTGCTTTATTGCTTATTATTTAATAGTCGCTGAAACATGCCATTAAGAAGTGGTTACCCGTCTTCAAAACACAGCGGAGGCCATAAGTCTATAACAAATGTACTAATAGTGTAACTATGCTGAGGTAGGATGGTTAGTATATCCAACAATGGACTGTGTTTACTCTTCAGCCTCTTTGGTGGTTATTCTCTCATAATCATTATTTTCGAGACAACTATACATCCACACATTTCACCCAAACATGTTTTGTGTTGCGCCATTTTTCTTCTTTGCAGCGGAGTATCTCCTTGTTCGATTCTTCGCGCTAGTCTAG…	TCCTCAAACGTTGAGCAATTCATGGAAATACGACCTTAACATGGTTACTCTTGATCCATTAACATACATCTCATCAAAAACGCGTCCTGCTTTATTGCTTATTATTTAATAGTCGCTGAAACATGCCATTAAGAAGTGGTTACCCGTCTTCAAAACACAGCGGAGGCCATAAGTCTATAACAAATGTACTAATAGTGTAACTATGCTGAGGTAGGATGGTTAGTATATCCAACAATGGACTGTGTTTACTCTTCAGCCTCTTTGGTGGTTATTCTCTCATAATCATTATTTTCGAGACAACTATACATCCACACATTTCACCCAAACATGTTTTGTGTTGCGCCATTTTTCTTCTTTGCAGCGGAGTATCTCCTTGTTCGATTCTTCGCGCTAGTCTAG…
RPS4B	S_Mikatae	1.51308	0.0284311	TCCTCGAACGTAATCGATTCATGGAATTGTGAACTTGTCATTGTTGCTCTTGATTCATTTACATTCACGCCATCAAAAACGCGTCCTTCTCTACTGCTTAACATTAATAGTTAATAAAACATGCCCATCGCCGACAATTACCCGTCTTCGCGACACAGCTAAGGTCTAAAAGACTTTAGCAAATGAATCAATCTTGCAACTGTGTTAAAATAGTATAAACGGTGAAAGCAATATTGTACTGAATTTATCTTTCAAACTGTTGTGTGGGTATTCTCTTCTGGCATCATCCTTTTTGAGACTGTTGTACATCCACACATTTCCCCCCAGACATTCTTTTTTTAGTGAAACATAATCGCCCTCTTTACAACGCGAAGGCCCTTTGCCCTCTTTTTCCGCCGA…	TCCTCGAACGTAATCGATTCATGGAATTGTGAGCTTGTCATTGTTGCTCTTGATTCGTTTACATTCACGCCATCAAAAACGCGTCCTTCTCTACTGCTTAACATTAATAGTTAATAAAACATGCCCATCGCCGACAATTACCCGTCTTCGCGACACAGCTAAGGTCTAAAAGACTTTAGCAAATGAATCAATCTTGCAACTGTGTTAAAATAGTATAAACGGTGAAAGCAATATTGTACTGAATTTATCTTTCAAACTGTTGTGTGGATATTCTCTTCTGGCATCATCCTTTTTGAGACTGTTGTACATCCACACATTTCCCCCCAGACATTCTTTTTTTAGTGAAACATAATCGCCCTCTTTACAACGCGAAGGCCCTTTGCCCTCTTTTTCCGCCGA…
RPS4B	S_Bayanus	1.28734	0.0238699	TCCTAAAGAAGCCAGTTCATGGGAATGCAAACTCATTTTTACTGTTCTTGATCCATGAACACACGTCATCAAAAACGCGTCCTTCCTTATGGCTTACCACTAATAGTTGCCAAGACAAGCCAAATTATAGGCCGTTACCCGCCCTCACAACACTATAGAGAACCAAAGTTGGCCTTGTACTAATTCGCAACTATCTCGCCAGTCCTGAGCTGGTATAGCATTATCTTACAGGTCTATTGATATTTGGGCCAACTTCTATAACCACCTTAAGGTGATCTCTCTCTCTCTCTCTCTCTAAAAATATATCTTCGAGACTGCATGTACATCCACACATTTTCACCCAGACATATTTTTTCCAAAGTTGTGTTTTTCTTATTTTTTCACCACGCCAAAAGAGAG…	TCCTAAAGAAGCCAGTTCATGGGAATGCAAACTCATTTTTACTGTTCTTGATCCATGAACACACGTCATCAAAAACGCGTCCTTCCTTATGGCTTACCACTAATAGTTGCCAAGACAAGCCAAATTATAGGCCGTTACCCGCCCTCACAACACTATAGAGAACCAAAGTTGGCCTTGTACTAATTCGCAACTATCTCGCCAGTCCTGAGCTGGTATAGCATTATCTTACAGGTCTATTGATATTTGGGCCAACTTCTATAACCACCTTAAGGTGATCTCTCTCTCTCTCTCTCTAAAAATATATCTTCGAGACTGCATGTACATCCACACATTTTCACCCAGACATATTTTTTCCAAAGTTGTGTTTTTCTTATTTTTTCACCACGCCAAAAGAGAGGA…
RPS5	S_Cerevisiae	1.8846	0.0255493	TCACGAAAACACCTTGTAAATACTACTTGTGAATATGCAAATAGGAAATAGATATATGCATACAAATAAGAAACAATGAACAGCCTTGAGTTCTCAAATTTGCATATCATTTGTTACGTAATTCCTTATCAAGACCTTTTATACAACAACACCCATATACCCATAATTATTCTTAACCCATACATATTTGTCTCAAGTTTATTTTTCAGATGAGAATGGCCCTGCATCAGTTTTTTTCCAGAAACTAATTCATGGTAACAAACATTTCGCGCCCTGCTACGGGGAAGGAGAATTCTTTTTCTCCCGCCCAGAACGTAAAGCCTTGTTTCTTTCTACCGTACTGGGCCCGTCTAATTCTGCCCCTTTGCTGGGAAATCTCCTTTGCAAGCTCCCCTACCT…	TCACGAAAACACCTTGTAAATACTACTTGTGAATATGCAAATAGGAAATAGATATATGCATACAAATAAGAAACAATGAACAGCCTTGAGTTCTCAAATTTGCATATCATTTGTTACGTAATTCCTTATCAAGACCTTTTATACAACAACACCCATATACCCATAATTATTCTTAACCCATACATATTTGTCTCAAGTTTATTTTTCAGATGAGAATGGCCCTGCATCAGTTTTTTTCCAGAAACTAATTCATGGTAACAAACATTTCGCGCCCTGCTACGGGGAAGGAGAATTCTTTTTCTCCCGCCCAGAACGTAAAGCCTTGTTTCTTTCTACCGTACTGGGCCCGTCTAATTCTGCCCCTTTGCTGGGAAATCTCCTTTGCAAGCTCCCCTACCT…
RPS5	S_Paradoxus	1.93665	0.035451	TACGAAAGCACCTTGTAAATACTACATGTGAGTATGCGTATAGGCATGTGCATATATATATATATATATGTATATATTATATGCACATGAACAGAAAAAAAAGAAAGCTTGCATTTTCAATTTTATATCATTTGTTACGTTCCGCACTCACCAAGACTACTTTATATAACACCCATCTACCCATTCCTTTTTTAACCCACACATATTTTGTCCAAGTTTATTTTTCAGATGAAGAATGCTCTGCATCTATTTTTTGCCTGGAACACATCCTTCGTAATAAACATTGTGCGCGCTGCTACGGGGAAAGAACTCTTTTTTCTCCCCCCAAGACGTATGGCCTTGTTTCATTCTGTTGCACTGGGCCCCTTCTAATTATGCTCTTTCGTTGGGAAGCTCCTT…	TACGAAAGCACCTTGTAAATACTACATGTGAGTATGCGTATAGGCATGTGCATATATATATATATATATGTATATATTATATGCACATGAACAGAAAAAAAAGAAAGCTTGCATTTTCAATTTTATATCATTTGTTACGTTCCTCACTCACCAAGACTACTTTATATAACACCCATCTACCCATTCCTTTTTTAACCCACACATATTTTGTCCAAGTTTATTTTTCAGATGAAGAATGCTCTGCATCTATTTTTTGCCTGGAACACATCCTTCGTAATAAACATTGTGCGCGCTGCTACGGGGAAAGAACTCTTTTTTCTCCCCCCAAGACGTATGGCCTTGTTTCATTCTGTTGCACTGGGCCCCTTCTAATTATGCTCTTTCGTTGGGAAGCTCCTT…
RPS5	S_Mikatae	1.84758	0.0222151	TATCTAATACGCCTTGTAAATACTATTTTGCGTATGTATATATTAAGTGAATGCGAGGACATAAGTTGAGAAAGAATGCCCCAATTAAACTATATATCATCTTCCACGGATTCTGTTTTTCTAGGACACCTTTTTGTGAACACCCATTGACCCATATAGCTCTAAACCCATACAGTCTTATACTCCTATTTATTTTTTTAATGTATCGAAGGTCCACATCCTTTTTCCGGAATTTGTCCTTCCAGACAAGGGCGCCCGGCTACGGGAGGAATCTTCCTCACTCCTACCAGAACGCAAAGTGTCGTTTCAATCTGTGCCACTGTGTCCCCCCAGTATGTTCTTCGTTGGGAGGCCTCCTTTGCAATCTCCCTTAGTTTTACCACTGGCCAGTGGAAGGCT…	TATCTAATACGCCTTGTAAATACTATTTTGCGTATGTATATATTAAGTGAATGCGAGGACATAAGTTGAGAAAGAATGCCCCAATTAAACTATATATCATCTTCCACGGATTCTGTTTTTCTAGGACACCTTTTTGTGAACACCCATTGACCCATGTAGCTCTAAACCCATACAGTCTTATACTCCTATTTATTTTTTTAATGTATCGAAGGTCCACATCCTTTTTCCGGAATTTGTCCTTCCAGACAAGGGCGCCCGGCTACGGGAGGAATCTTCCTCACTCCTACCAGAACGCAAAGTGTCGTTTCAATCTGTGCCACTGTGTCCCCCCAGTATGTTCTTCGTTGGGAGGCCTCCTTTGCAATCTCCCTTAGTTTTACCACTGGCCAGTGGAAGGCT…
RPS5	S_Bayanus	1.95064	0.0405295	AGACAAAATACACTGTTAATAACACTAGTGCATATTCATATATACATATATATATATATATAAACAAGAAAAAGCCTGCATTTTCATTTCAATATCGTTTCTCATCTTACCCATTTTTCCAAGACTTATTCCCCCGCAGTACACCCATCACCCATCATTTTCATCCACAGTTCATCACCCGTACACCATTTTTCAGGATGTATAATTTACAAAACGAGAAACGCTTCGCATTATTTTTTCTGAATTTATCCTTCGTGACAAACAGGCGCCCAGTGCCACGCGGGCGGAAAAAGGATGATTCCTTCCGCCAGAAGGGGCAAAGCTTCGTTCCGTCTTGTGGCGGCGCCTCCTTTCTAGGCAGGCATCTTGTGAGGAAAGTTCCTTCGCAAGCTCCCCAAG…	AGACAAAATACACTGTTAATAACACTAGTGCATATTCATATATACATATATATATATATATAAACAAGAAAAAGCCTGCATTTTCATTTCAATATCGTTTCTCATCTTACCCATTTTTCCAAGACTTATTCCCCCGCAGTACACCCATCACCCATCATTTTCATCCACAGTTCATCACCCGTACACCATTTTTCAGGATGTATAATTTACAAAACGAGAAACGCTTCGCATTATTTTTTCTGAATTTATCCTTCGTGACAAACAGGCGCCCAGTGCCACGCGGGCGGAAAAAGGATGATTCCTTCCGCCAGAAGGGGCAAAGCTTCGTTCCGTCTTGTGGCGGCGCCTCCTTTCTAGGCAGGCATCTTGTGAGGAAAGTTCCTTCGCAAGCTCCCCAAG…
RPS5	S_Kluyveri	1.25602	0.0233638	ATTATAGCGCCGTGTAAGCTAAAATCTTGTAAATACTATAGTAATAATGCATGCTGATAACATTCATACGACTTCACGAAAACATCTGGGGAAACGTATGTTTCCGTAAGAAATGCTTAGAAACAAGGACTGCACACCAGGGAAACCCATACATCTAAAAAAGAAATTGTCCAGCTTTAACATCAGAACACCACGATACGAGGCTCAGAAAACTCACAAACTGGAAAAAAAGAGCTCCTAGGTTGGCCCCGTACTGGTAAAAAAGTTCCAGATGCTCCCCGGGCTGAGCTCCACGAGATGCCTCACCAAACCACCGCATACGCGTTGTCCCTCACAGAGTCTGTCCCCTTGCTACCGGCGGGGGAAGCACCTCTGTCCTTGCCAGCCCCCCTGCCTAGC…	-
RPS5	K_Lactis	1.2806	0.0241811	CACAGAGTCTGAAAAGAATATATACACTGAGCGTCCACCAATACTACATGACATTCCATCATACCTATTTATACGTAATATTATAGAAATCAATTACACGTACCAATGCATCTTTTAATCGTTAAGAACATCGATAGAATCGGAATGATTCGTCGGCCTTTCCAGGAAATGAAGATGCGCCATTATTGTGCAGTCATAGATAGTACCTTAAAAAACATGATAGGAAGACAGAATGTTGGACTGTTTCAACACCCACACACCAACATTCAATATGAAAAATTAAGAAAGTTTATCCAAAATTGATATTCCTGATTTGGTATTTTGAAAACTGCGAACCATTCTAACACCAAATTTCGATGTGGGAGGCGAGTAACACATACTGAATTTGTACAGGGAGCA…	-
RPS6	S_Kluyveri	1.4165	0.0212948	TCAATTGTATATTAGTGGGGGAAGTTTTCGTTGCATATCCAATTCATTCATTTAATTACCCATCCCTGGATCCATTCATTCATTCATTCATTCATGCATTCATTCATTCATTCATTCATTCATTTATTTCGCCTAAATTTAATTTATCTCATAATAACTGACTTTCATGCTCCCACAATCGCTCCTAAATTTACATCTACATATCCCTTTATTTTTTTAGTTTAACAATTGACAATCTACTCTAGCTCTTTGGTATATGGGCTCTTACCAGCTACTTCGAAAAGTGGTGCCGTATTAAATTATCTAGTGATACATGGTATGTGACTTCGCTTTGTGTGTGCATCCGTACATCATACAAATCATTTTACTTGTAACCCATACATTCTGCAATATAAGTTA…	-
RPS6	K_Lactis	1.28013	0.0460715	GTTATTTATATTCCGCTTTTATTTGTAACACTAAACCAACATTCCTGTAATAAACACTGTAAAAGACGCTTGTGTATATACTATGAAGATGACACTAAAGTTGTAACATTAATTTGTGTGAATTATGCGCAAGATTATATATCTGGTATACAGATAAATCAATTGCAAACTCTACCATATTACAATATAACAAGAATGCGCAGTTATGTTTCATATCAATCACAACAAGAAACAGAAGATGTTATAGTCTAAAGCTTAGTTATTGAATTTCAACAAATTCCTCTACATTCCTCTACGTTCCTCTACATGTTGCTCACGAATAACGAGTTAGACACCAGTACGAAGACAATGACGAAGATACTTGAAAAATGAAAGTTAGGGAAGTTTTGATCACGTGCT…	-
RPS6A	S_Cerevisiae	1.03926	0.0554717	ACCAAAAAATTTGACCAGTATGAATATTCCAAGCATAAGAAACTTCTTTTCATTTAAAAAATTTATATTTATATTATTGTAAATGCACATATTTACGTAGTGAATAACCCAAACAAGGAAGAAAAACGAAAAACTCAATTGCATTTTCTGAATAATGATAGTATTTAAGTACTCTTTTGTGCATTAGCAACTAAAATGAATTGCCGCCTGGCCTGGAGTTTGATGTAAGCAGAAGCCGGAAGAAGACAAGAGGTTCATTCAGAGAAAACATCCGTACATTCGAGTTCTCATTGAACCCATACATTTCAACTATTTTTACATAGTTCGTTTTTCATGTGTAAAATTGTCATCGACGCGCCGGAGCATCGGAAAGTTGGAACGTGCGCGATTGCACCAATC…	ACCAAAAAATTTGACCAGTATGAATATTCCAAGCATAAGAAACTTCTTTTCATTTAAAAAATTTATATTTATATTATTGTAAATGCACATATTTACGTAGTGAATAACCCAAACAAGGAAGAAAAACGAAAAACTCAATTGCATTTTCTGAATAATGATAGTATTTAAGTACTCTTTTGTGCATTAGCAACTAAAATGAATTGCCGCCTGGCCTGGAGTTTGATGTAAGCAGAAGCCGGAAGAAGACAAGAGGTTCATTCAGAGAAAACATCCGTACATTCGAGTTCTCATTGAACCCATACATTTCAACTATTTTTACATAGTTCGTTTTTCATGTGTAAAATTGTCATCGACGCGCCGGAGCATCGGAAAGTTGGAACGTGCGCGATTGCACCAATC…
RPS6A	S_Paradoxus	1.44525	0.0362459	ACTAAAATGATTGATTAGTACAAATATTCCAAAGCATAAGAAATTTCTTTTCGTGAGAATAAAGAAATACATTATTTTATTTACATTAATATTAATTCACATACTTACGTAATGAATTACCCAAAAAAGGAGAAAATATCATAAAAATCAATTGCATCCTCCTCTGAATACTGGCAGTTTCAAATAACTTTTTATACATCAGCAACCGAGCATATTTGCCGCCTTGTGTGTAAAAATATAAAGTGTAAAACGGCTGAAGCCGGGAGAAGCCGAAATATTCCTTGGTGGTATAACTCCGTACATTCGAGGTTTAATTTAAACCCATACATTGTCACAATTTTCACACTGCTTTTTTTTTCTGCGCGTGAAATTCTAATTGACAGACGGAGGCATCAGACA…	ACTAAAATGATTGATTAGTACAAATATTCCAAAGCATAAGAAATTTCTTTTCGTGAGAATAAAGAAATACATTATTTTATTTACATTAATATTAATTCACATACTTACGTAATGAATTACCCAAAAAAGGAGAAAATATCATAAAAATCAATTGCATCCTCCTCTGAATACTGGCAGTTTCAAATAACTTTTTATACATCAGCAACCGAGCATATTTGCCGCCTTGTGTGTAAAAATATAAAGTGTAAAACGGCTGAAGCCGGGAGAAGCCGAAATATTCCTTGGTGGTATAACTCCGTACATTCGAGGTTTAATTTAAACCCATACATTGTCACAATTTTCACACTGCTTTTTTTTTCTGCGCGTGAAATTCTAATTGACAGACGGAGGCATCAGACA…
RPS6A	S_Mikatae	1.02859	0.0481361	ACTCATAGATTTGCACTAATATCACAAGCATAAGAAATTTCTTTTTACAAAATAATCACTTTCCTTCCCTTTTCATTTACTTAAGTATTGATACACATATTTACGTAATAAGCGCCCAAGAAGAAGAAAATATCTAAAAACGTTTATTGCATTGGCAGTTATTTTTTTTTTCACTGTCCACTGGCCATATTTGTCTCTTGGTGTTAGTAAGTATCGACATAAAACAGCGAAAGATAAAAAAGTAGGTTCTTCTTTATGTTATACATCCGTACATTCACTACCCTTTGTTGGACCCATACATTGTATTGTTTTTGCAACAGTTTGTGGAAATGAATTCTGCGCGAAGTATTTACCGATATTCGGACATATCAAATAAAAAACAGCTTACGGGATCATCGT…	ACTCATAGATTTGCACTAATATCACAAGCATAAGAAATTTCTTTTTACAAAATAATCACTTTCCTTCCCTTTTCATTTACTTAAGTATTGATACACATATTTACGTAATAAGCGCCCAAGAAGAAGAAAATATCTAAAAACGTTTATTGCATTGGCAGTTATTTTTTTTACACTGTCCACTGGCCATATTTGTCTCTTGGTGTTAGTAAGTATCGACATAAAACAGCGAAAGATAAAAAAGTAGGTTCTTCTTTATGTTATACATCCGTACATTCACTACCCTTTGTTGGACCCATACATTGTATTGTTTTTGCAACAGTTTGTGGAAATGAATTCTGCGCGAAGTATTTACCGATATTCGGACATATCAAATAAAAAACAGCTTACGGGATCATCGTC…
RPS6A	S_Bayanus	1.10267	0.0603084	ACAACGTTCAGTGACTAGTACGAATATTCTAAAGCATAAGTGACCTCTTTTTATCAAGAAACCACCTTCTTCTATTTTTACCAAGATATAACACACATATTTATGTAACCAAATACCTGAAAAATAAACAAAACAAAATCCATCGCATCAAAATCGCAATAGTGCCAGTTTCTATTTGCTTTCTCTCCTACATTATTTGCAGTATCGATATATGTATATTATAAAGGAGCGAAAAAGCGAAAAAAAAAAAAAAAAAAAGAACCATTTAATTCTTCTAACATCCGTACATTTATGTTATCAAATAGACCCATACATTTACATTACTTCTACAAAAGGTCGGTCTATCACGAGTGAAAAACTCAACGGTTATGGGGCGCATCGGATCGTCAAGGATTGTAC…	ACAACGTTCAGTGACTAGTACGAATATTCTAAAGCATAAGTGACCTCTTTTTATCAAGAAACCACCTTCTTCTATTTTTACCAAGATATAACACACATATTTATGTAACCAAATACCTGAAAAATAAACAAAACAAAATCCATCGCATCAAAATCGCAATAGTGCCAGTTTCTATTTGCTTTCTCTCCTACATTATTTGCAGTATCGATATATGTATATTATAAAGGAGCGAAAAAGCGAAAAAAAAAAAAAAAAAAAGAACCATTTAATTCTTCTAACATCCGTACATTTATGTTATCAAATAGACCCATACATTTACATTACTTCTACAAAAGGTCGGTCTATCACGAGTGAAAAACTCAACGGTTATGGGGCGCATCGGATCGTCAAGGATTGTAC…
RPS6B	S_Cerevisiae	1.13031	0.0365281	ACTTTTTACTACAAGAAAGCATTCGCTTAAAATTAAGAGTGTATGTTGGCGCATTTAGGCAAACGTCTTCTAAATTAGGGCTATAGACAATTATGTCGCTCGTACATTTTTCAGATGTAGTGACGCAAATTTCTAGCAATTTGCAGGTAGTGCTCCACGGCCCCCTTCCAATTTTTGTGCACTCAATCGATCAAAACAATAGAGACTGCCCTGTTAACTTCTCAACATAATTATGTAAAAAATTATCTCATTAAGCCAGATAGCAAATATATCACATATTGCATTGATTAATTTGAGAAAAATATACATGTATCTTTTCAGTTAATTTTATTAAAAATAAATTATTTCCTTACTTTTTTTTCTACAGTTTGCACCATTAACCTCTTTTCTTGCATCCAT…	ACTTTTTACTAAAGAAAGCATTCGCTTAAAATTAAGAGTGTATGTTGGCGCATTTAGGCAAACGTCTTCTAAATTAGGGCTATAGACAATTATGTCGCTCGTACATTTTTCAGATGTAGTGACGCAAATTTCTAGCAATTTGCAGGTAGTGCTCCACGGCCCCCTTCCAATTTTTGTGCACTCAATCGATCAAAACAATAGAGACTGCCCTGTTAACTTCTCAACATAATTATGTAAAAAATTATCTCATTAAGCCAGATAGCAAATATATCACATATTGCATTGATTAATTTGAGAAAAATATACATGTATCTTTTCAGTTAATTTTATTAAAAATAAATTATTTCCTTACTTTTTTTTCTACAGTTTGCACCATTAACCTCTTTTCTTGCATCCATA…
RPS6B	S_Paradoxus	1.0645	0.0283886	ACGGTTTTCTATTACCGGAAGTATTCACCTGATTATATATGTTTGCATATTCAAGGAAACATCTTTCAAGTTGGGAATGTAGACACTAATGCCGCTCACACATACTTCAGATGCAGTGACACATATTCCTAGCAATCTACTGCAGTATTCTACGGCCCCATCCCAATACTGCTGCTGTCAACTTCTCACTCTAATTATGTAAAAAAACATTTCAATAAGCTAGGTAGCAAATATAGCAAATATTGCTTTGATTTGAGAAAATTTAGAGGTATCCTTACAGTTAGTTTTAACAAGAATAAATCATTTCCTTACTTTTCTAGAGCCTGCCCTTTATTTATTTTTCTTCTTGCATCCATACATCTTAGAAATCCGTACCTCTTACATTTTCTTTTCTTTTCA…	ACGGTTTTCTATTACCGGAAGTATTCACCTGATTATATATGTTTGCATATTCAAGGAAACATCTTTCAAGTTGGGAATGTAGACACTAATGCCGCTCACACATACTTCAGATGCAGTGACACATATTCCTAGCAATCTACTGCAGTATTCTACGGCCCCATCCCAATACTGCTGCTGTCAACTTCTCACTCTAATTATGTAAAAAAACATTTCAATAAGCTAGGTAGCAAATATAGCAAATATTGCTTTGATTTGAGAAAATTTAGAGGTATCCTTACAGTTAGTTTTAACAAGAATAAATCATTTCCTTACTTTTCTAGAGCCTGCCCTTTATTTATTTTTCTTCTTGCATCCATACATCTTAGAAATCCGTACCTCTTACATTTTCTTTTCTTTTCA…
RPS6B	S_Mikatae	1.0736	0.0437652	CCTGTTTCCTTTATAGGGGATTATTCACTAGATTATTTATGTTGATAAATCCTAGTAGATGTTTTTTTATTGAAAAATAAAAAACCAATCTCACTAGCAAACATTTTAGATATAAGTTTCCAATCATCAATCGGTTGTGCTGTTATGCGACCCATCGCCGATATTTGGGAACTCAAGCAATCAAAACAAAAGAAACTTCTTTCACCAACTCCTCAACAAAAAAGTGTAACAATCCTCTGAAGAAATTAGATAGCATATATACGACGTATTCCATTGATCTAAGATAATTTAAAGGCACCTTGCGGTCAGTGGAGAGTGCTTGTGGATAGCTTTCCTCCTCTTTTAATATAAACCGCCCAATTTATTCCAAATAATTACATCCGTACACCTGTAAAATCC…	CCTGTTTCCTTTATAGGGGATTATTCACTAGATTATTTATGTTGATAAATCCTAGTAGATGTTTTTTTATTGAAAAATAAAAAACCAATCTCACTAGCAAACATTTTAGATATAAGTTTCCAATCATCAATCGGTTGTGCTGTTATGCGACCCATCGCCGATATTTGGGAACTCAAGCAATCAAAACAAAAGAAACTTCTTTCACCAACTCCTCAACAAAAAAGTGTAACAATCCTCTGAAGAAATTAGATAGCATATATACGACGTATTCCATTGATCTAAGATAATTTAAAGGCACCTTGCGGTCAGTGGAGAGTGCTTGTGGATAGCTTTCCTCCTCTTTTAATATAAACCGCCCAATTTATTCCAAATAATTACATCCGTACACCTGTAAAATCC…
RPS6B	S_Bayanus	1.07732	0.0115296	AGTTTTTACCAAGGAGTATTTTACTTTATTATATATGCAGATATATTCGAGTTAGTGTATTTTAGTACGGAAATAAAGGCATTTTTCGGGGCAGTATTCCAGTAATTAATACAAGTAATCAGTGGCCCATTCTATTACTATGTAACCCTTTTCTGTCTTTTGTGTATTAAGGTAATCAAACTGTCAGCCGTTCATCGAAATAATGTAATGGATTTCAAATAGGCCAGATGTTGAAACATATATATCATGTCTACTTTAGTTTGAGAAGATTCTAAGAAGTACAATGACGACTTTTGTGCCTTTATCAACAAAAAGGGTAGTTTATCACACAGGGCTGAAATTCGCAGTATGTTGTCTTGTTTACATCCGTACATTTGTAAACATCTATACCTCTCTTAC…	AGTTTTTACCAAGGAGTATTTTACTTTATTATATATGCAGATATATTCGAGTTAGTGTATTTTAGTACGGAAATAAAGGCATTTTTCGGGGCAGTATTCCAGTAATTAATACAAGTAATCAGTGGCCCATTCTATTACTATGTAACCCTTTTCTGTCTTTTGTGTATTAAGGTAATCAAACTGTCAGCCGTTCATCGAAATAATGTAATGGATTTCAAATAGGCCAGATGTTGAAACATATATATCATGTCTACTTTAGTTTGAGAAGATTCTAAGAAGTACAATGACGACTTTTGTGCCTTTATCAACAAAAAGGGTAGTTTATCACACAGGGCTGAAATTCGCAGTATGTTGTCTTGTTTACATCCGTACATTTGTAAACATCTATACCTCTCTTAC…
RPS7	S_Kluyveri	0.950095	0.025809	CAAAGACAGGTTTTTCCCACGTTGCTGTGAGTTCTGTTAACGTGATCGGACAGCTGTAGTCTATACTTGGCTGGCAATGCATAAATAATATGTTGCACCTACAAGCAGAGTAAAAAAGTGCCGGTGCAGTTTGCCGTATCGTAATATTCTTAATTGCCTCTCAAGGTTGAAGTTCCTCTATCAGCCTTTAGAAACTCACGACGAAGCCGATTGTCTCTTTTAGCCCAGCAAAACATTTGTGTCCTTTTCCAGATCATGCAATTAGACAACATCAGGTTCTAGAAATGGATTGTACGTAATGTAGACGTTTCCAATGGAATAAAAAAGGGTTACATTCGATTAGTTTCAACATAAGAGCAATAGGTTAATTGAAACTCTATTTTGGATGTAAAGTAAACA…	-
RPS7	K_Lactis	1.1879	0.0261225	ATATATAAACTTTGGTAAATGAGCGCTACATATTTCAGCCAACTAAATTCCATCTCACATTGACATTAATGTGAGCCATCAGAAAAACTAGGAAAAAAAAGAAAAAAAGAACAAAAAACGATCAAAGCGAATGCTGAGATATTACGGGAGGAATGGGAAGTAGTTCCAGTTGGAGATCTCGAAGCGGAGCTTGACGCATTATATCAACGTTGGGCAAGGAAATACTTATCAATGCATTAATATTCTTCCCGGGTAATTTTTTCTTGTGCTAAAGGACGTTCGTTGTTCATAAATGCTTAAAACATACACTACTATGTCATAAAAACGTGACTCTTTGGGATGGTAACTGCTTGATGCTTTCTCTTTCATCTCTTTCTCACAAAAAAAACACCTGGAGAA…	-
RPS7	D_Hansenii	0.231312	0.00274302	ATATACGGCTCCTTCTGGCTCGTAAATACTGGCCAGTATATTATGGCTGAACACTAGCTACGACTGGCGGGATGAGAATCATGGAAATTCATATTCCTGCAGATAATCTCTCAGTAATAATTTGGTGCATTGATCTAATGAGTGGTAGGATGTAACCCCGGAATTATGGCTTGGTTCAGCTAACCCCCGCCATACTGCAGACAACCTCGAATCAAATAGCAGTCACAACCTTCACATGATATACTGTCCGTTTTGGTGCTCATCGCGCCAAATTTGACCATTCGACACGATAATATTGTTTTGTGTAATTTTTCACCAAGCGGTGCGAAATTTGGAAAATTTTCTCAATACACTGTGAGTAGGCTCGATTGGGTTACACCAACTGTCTGGAGCAAATTG…	-
RPS7	Y_Lipolytica	0.0237042	0.00497326	ACGAACTGTGTAGGAATGAAACAACAACATAGACTCGCTAATACTGATCTCACAGTAACAAAAGTAGTCTTATTTTGAATCTGGAATCTCACTGAGTCTTTGAGGCACTTTTACTCCCATTGGTCCTCACATTTCACGACTTGTAAAGACAAAAGTTTTTCTATCGTAACGCAGGGAAGAAGCGACCTTAGCGTCCGATACTAACATGGACGAAATACTTGTAAGGATACTTGCAACGTACTTGTACTTGTACAACCCAACCCTTTCCAATTGGATATGCGCAAACACAGTGGACATCATTCCACCAGATGCGGCACCAGACTCGTATCGGCAGCACCATTGTCCTCGTGACTTTTGCGCTAACGAAACACTATTTGGTCTCTAACCCCACAGTGTGGA…	-
RPS7	S_Pombe	0.0103765	0.00768717	ATTTTCTATAAATTATTTCTGATTTTAAACAAGTAGAAGTTATGTAAACAAATCTTTAATGGGTATTATAACTGAAAATTTACATGTATTCCGGAATATTCGTTGCAAACATTAAAATAACTATCTCTCAATTAGTTTTTTTTTTATTTACTAAAGAAGTAGGCTGGATGTTGAAATTAAAAGCAGAAAAGATTGGGATAAACCTGATTTAATTAATCAATTAAACAACATTTTTAAAGGCAGAATTTGAAAGATGCACTATGTGATGCCTAAACAATAAATCGGAGAAAAACAGTTACAAATAAATGAAATAGACAAAAAATTTGGACTTGGTATAATCTTAGAAACGTAAAATAATTTGATTAGTTTTTACATCTAAATTCATAAACCGATGTATGT…	-
RPS7A	S_Cerevisiae	1.27666	0.0282	TCACTGCCTCGGCCACAAGCAATCTGGGCCATGCCATTACTCCCATTAGCCCGAAAAAAAGAGGGGGTATGAAGCTAGTACATCATTATAACAAGTACTAAACTCAATTAATTCACTTACGAGACTTATACCAACGCTGGTTGATATACCACATTTGGCAGCATCCAAGGTTTCTCGTAAAATAGCTATAGTGTGGCGGACTTACCGGATGTCATTGTATAATCTTTTATAGAAAAAGGCTTTCTGAAATTTGAACATGACTAATTAACGCATATCAGGTGGGTAATCTTTCCGCAATACTATAACTTTGCTAGAAGTTATGTAAACGTTTTAGTTTACAAGAGAAAGTTTTGTGAACATTATCAGTGCCAAAACAGAAGCGGTATTACGATCGAAAAT…	TCACTGCCTCGGCCACAAGCAATCTGGGCCATGCCATTACTCCCATTAGCCCGAAAAAAAGAGGGGGTATGAAGCTAGTACATCATTATAACAAGTACTAAACTCAATTAATTCACTTACGAGACTTATACCAACGCTGGTTGATATACCACATTTGGCAGCATCCAAGGTTTCTCGTAAAATAGCTATAGTGTGGCGGACTTACCGGATGTCATTGTATAATCTTTTATAGAAAAAGGCTTTCTGAAATTTGAACATGACTAATTAACGCATATCAGGTGGGTAATCTTTCCGCAATACTATAACTTTGCTAGAAGTTATGTAAACGTTTTAGTTTACAAGAGAAAGTTTTGTGAACATTATCAGTGCCAAAACAGAAGCGGTATTACGATCGAAAAT…
RPS7A	S_Paradoxus	1.26108	0.0130277	TCGCCCGCCTCGGCCATAAGCCATCTCTGCCCACCACATACCATTCTTCCCATTTGCCCGAGGAAACAGGGGCGGCACTCACAAATGTGAATGGTAGCATGATTCTAACAAATACCAAGAAGCATTAGACTCATTAACGGAACTGATGTCAAACAATGGTTGATATACCGCATTTGACAGCACTAATTTGTGCGAGCGTTCTATTATGACGGACTTACCGAATGTCATTTTGAGATCTCTTTAGAACAGGGTTCTTGAAAAAGAAGGATGAATAATTAACACATATTAGATGGGTAATTTTCCGATAATAATATAGCTTTGCTAGAAGTAAGGTAAATGCTTTAGTTTGCAGCAAAAGTTTCGTGAAAAGTATGAGAGTCAAAAGAAGACCGGCATTAC…	-
[truncated: 18 more rows]

## Sheet: Supplementary Table S2
Name	Gene	Supp_Figure	PromoterActivity_Mean	PromoterActivity_SE	PromoterActivity_Mean_RelativeDiffFromWT	DesignedPromoter	ActualPromoter	NumMismatchesInActualPromoter	Comment
[truncated: 106 more rows]

## Sheet: Supplementary Table S3
Gene	PromoterActivity_Native	PromoterActivity_Mutated	Promoter_Native	Promoter_Mutated	NumMismatches
[truncated: 5 more rows]
